# Supplementary material for: 3-[N,N-Bis(sulfonyl)amino]isoxazolines with Spiro-Annulated or 1,2-Annulated Cyclooctane Rings Inhibit Reproduction of Tick-Borne Encephalitis, Yellow Fever, and West Nile Viruses
Source: MDPI journal article supplement (doi:10.3390/ijms241310758), 2023-06-28

# 3-[N,N-Bis(sulfonyl)amino]isoxazolines with spiro-annulated or 1,2-annulated cyclooctane rings inhibit reproduction of tick-borne encephalitis, yellow fever, and West Nile viruses

Kseniya N. Sedenkova <sup>1</sup>, Artem S. Sazonov <sup>1</sup>, Dmitry A. Vasilenko <sup>1</sup>, Kristian S. Andriasov <sup>1</sup>, Marina G. Eremenko <sup>1</sup>, Yuri K. Grishin <sup>1</sup>, Evgeny V. Khvatov <sup>2</sup>, Alexander S. Goryashchenko <sup>2</sup>, Victoria I. Uvarova <sup>2</sup>, Aydar A. Ishmukhametov <sup>2,3</sup>, Dmitry I. Osolodkin <sup>2,3</sup> and Elena B. Averina <sup>1,\*</sup>

<sup>1</sup> Department of Chemistry, Lomonosov Moscow State University, Moscow, Russia

<sup>2</sup> FSASI "Chumakov FSC R&D IBP RAS" (Institute of Poliomyelitis), Moscow, Russia

<sup>3</sup> Institute of Translational Medicine and Biotechnology, Sechenov Moscow State Medical University, Moscow, Russia

\* Correspondence: elaver@med.chem.msu.ru

## Supplementary materials

|                                         |   |
|-----------------------------------------|---|
| 1. Acute toxicity of compounds 3-5..... | 2 |
| 2. Copies of NMR spectra.....           | 3 |

**Table S1.** Acute toxicity of compounds **3-5**.

| <b>Compound</b>    | <b>CC<sub>50</sub> Vero 24h, <math>\mu</math>M</b> | <b>CC<sub>50</sub> PEK 24h, <math>\mu</math>M</b> |
|--------------------|----------------------------------------------------|---------------------------------------------------|
| <b>6</b>           | >100                                               | >100                                              |
| <b>Favipiravir</b> | >1000                                              | >1000                                             |
| <b>3a</b>          | >50                                                | >50                                               |
| <b>3b</b>          | >50                                                | >50                                               |
| <b>3c</b>          | >50                                                | >50                                               |
| <b>3d</b>          | >50                                                | >50                                               |
| <b>3e</b>          | >50                                                | >50                                               |
| <b>3f</b>          | >50                                                | >50                                               |
| <b>3g</b>          | >50                                                | >50                                               |
| <b>3h</b>          | >50                                                | >50                                               |
| <b>3j</b>          | 40 $\pm$ 3                                         | >50                                               |
| <b>3k</b>          | >50                                                | >50                                               |
| <b>3l</b>          | >50                                                | >50                                               |
| <b>4a</b>          | >50                                                | >50                                               |
| <b>4b</b>          | >50                                                | >50                                               |
| <b>4c</b>          | >50                                                | >50                                               |
| <b>4d</b>          | >50                                                | >50                                               |
| <b>4e</b>          | >50                                                | >50                                               |
| <b>4f</b>          | >50                                                | >50                                               |
| <b>4g</b>          | >50                                                | >50                                               |
| <b>4h</b>          | >50                                                | >50                                               |
| <b>4i</b>          | 35 $\pm$ 4                                         | >50                                               |
| <b>4j</b>          | >50                                                | >50                                               |
| <b>4k</b>          | >50                                                | >50                                               |
| <b>4l</b>          | >50                                                | >50                                               |
| <b>5b</b>          | >50                                                | >50                                               |
| <b>5c</b>          | >50                                                | >50                                               |
| <b>5d</b>          | >50                                                | >50                                               |
| <b>5e</b>          | >50                                                | >50                                               |
| <b>5f</b>          | >50                                                | >50                                               |
| <b>5g</b>          | >50                                                | >50                                               |
| <b>5h</b>          | 39 $\pm$ 8                                         | >50                                               |
| <b>5i</b>          | >50                                                | >50                                               |
| <b>5j</b>          | >50                                                | >50                                               |
| <b>5k</b>          | 14.9 $\pm$ 1.5                                     | >50                                               |
| <b>5l</b>          | >50                                                | >50                                               |

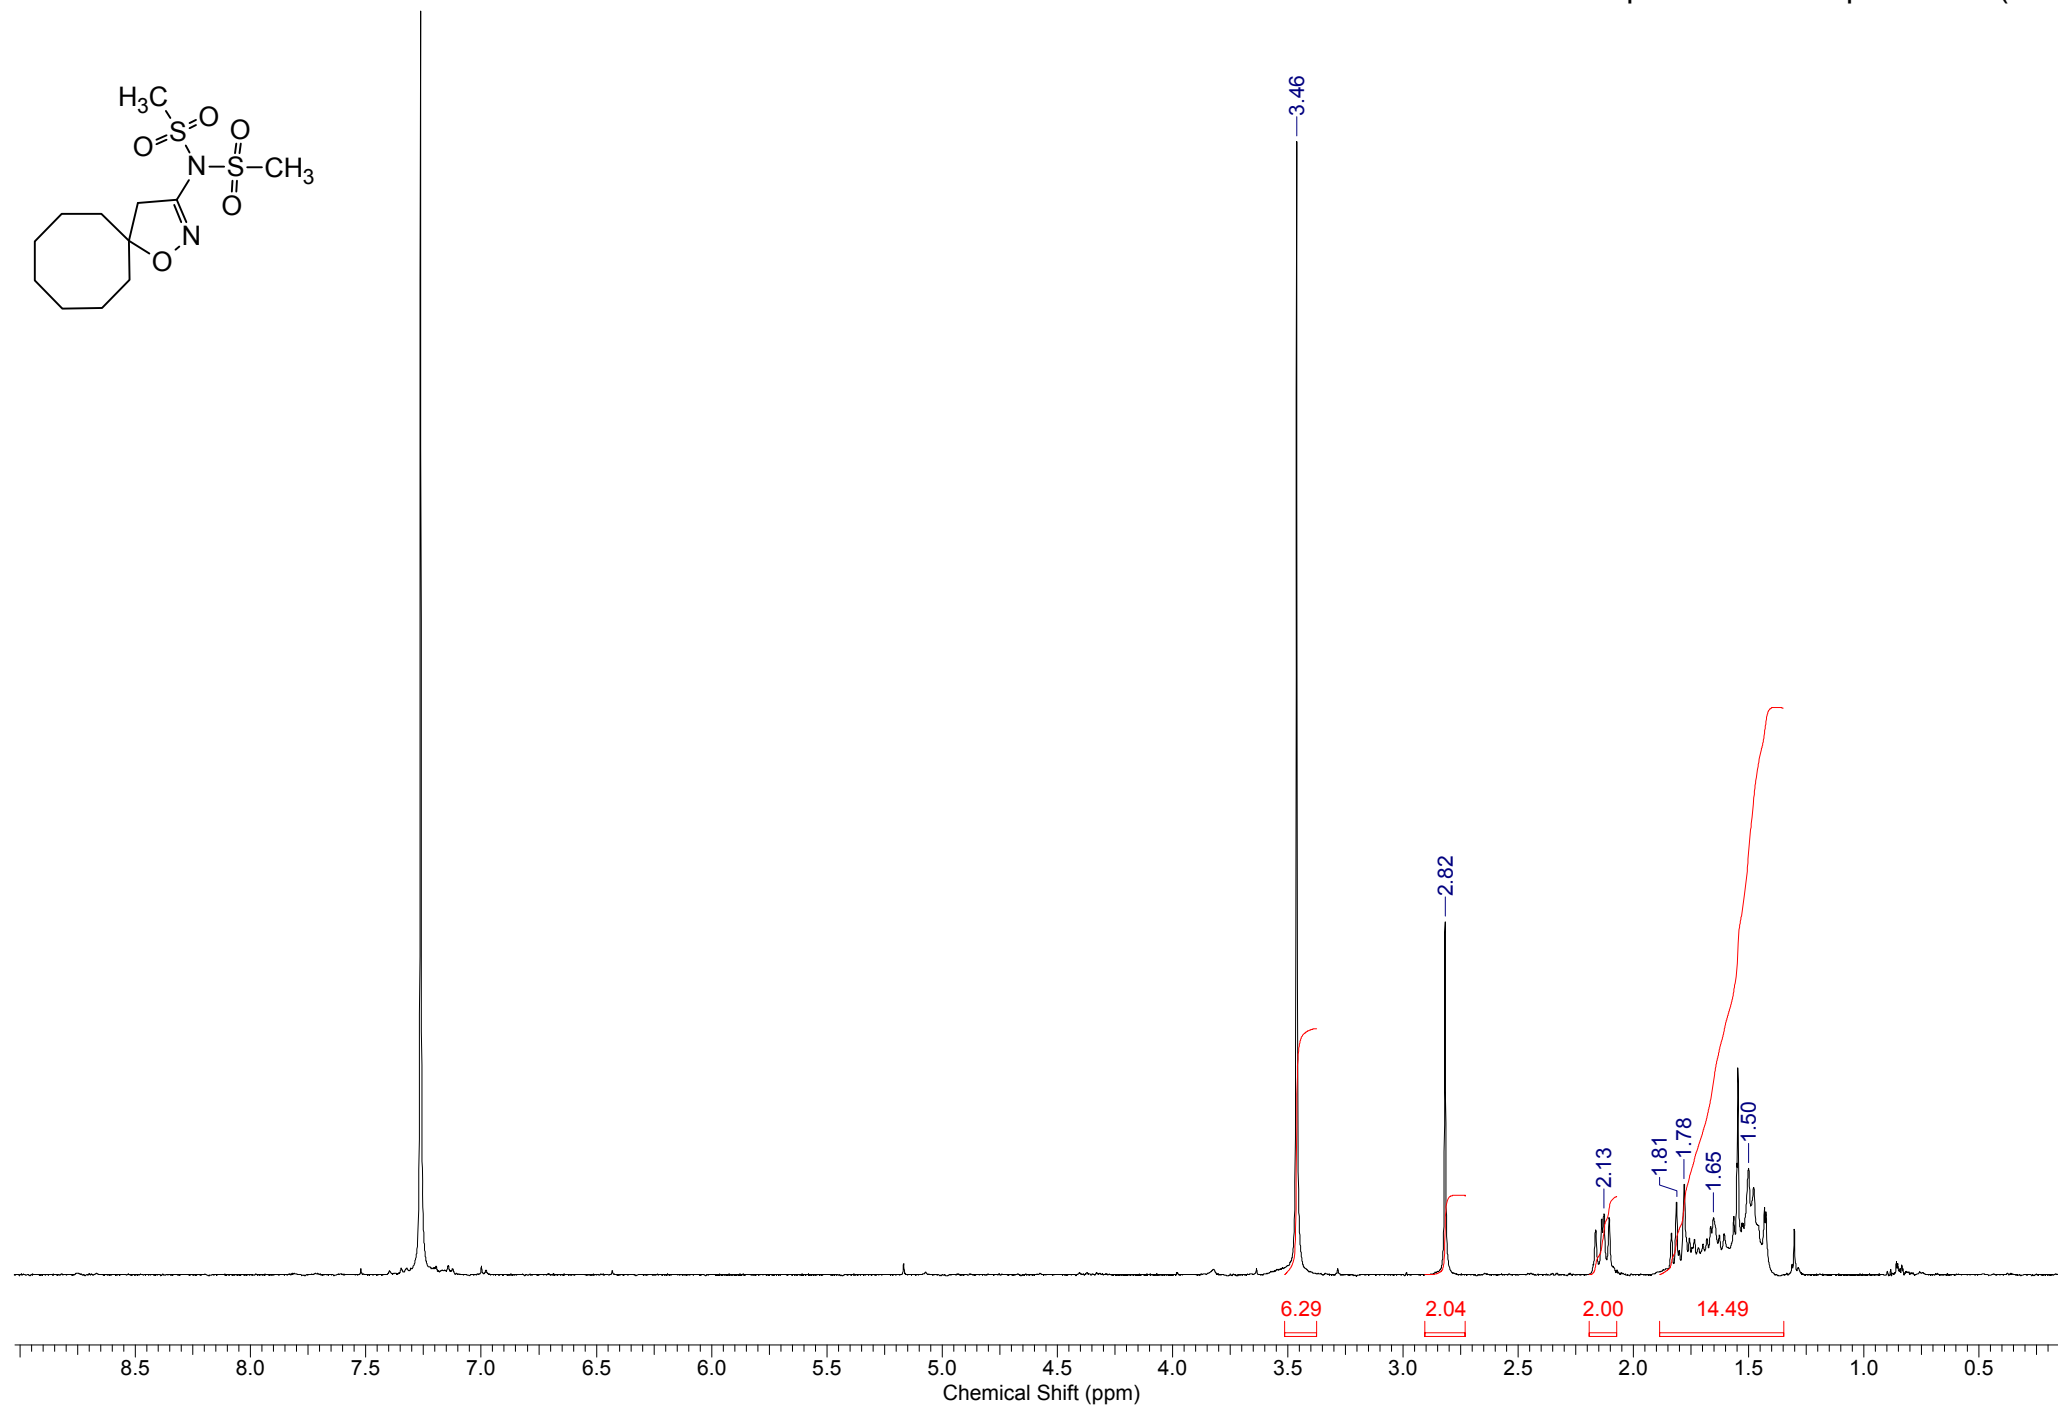

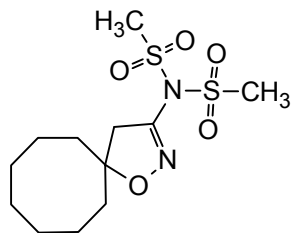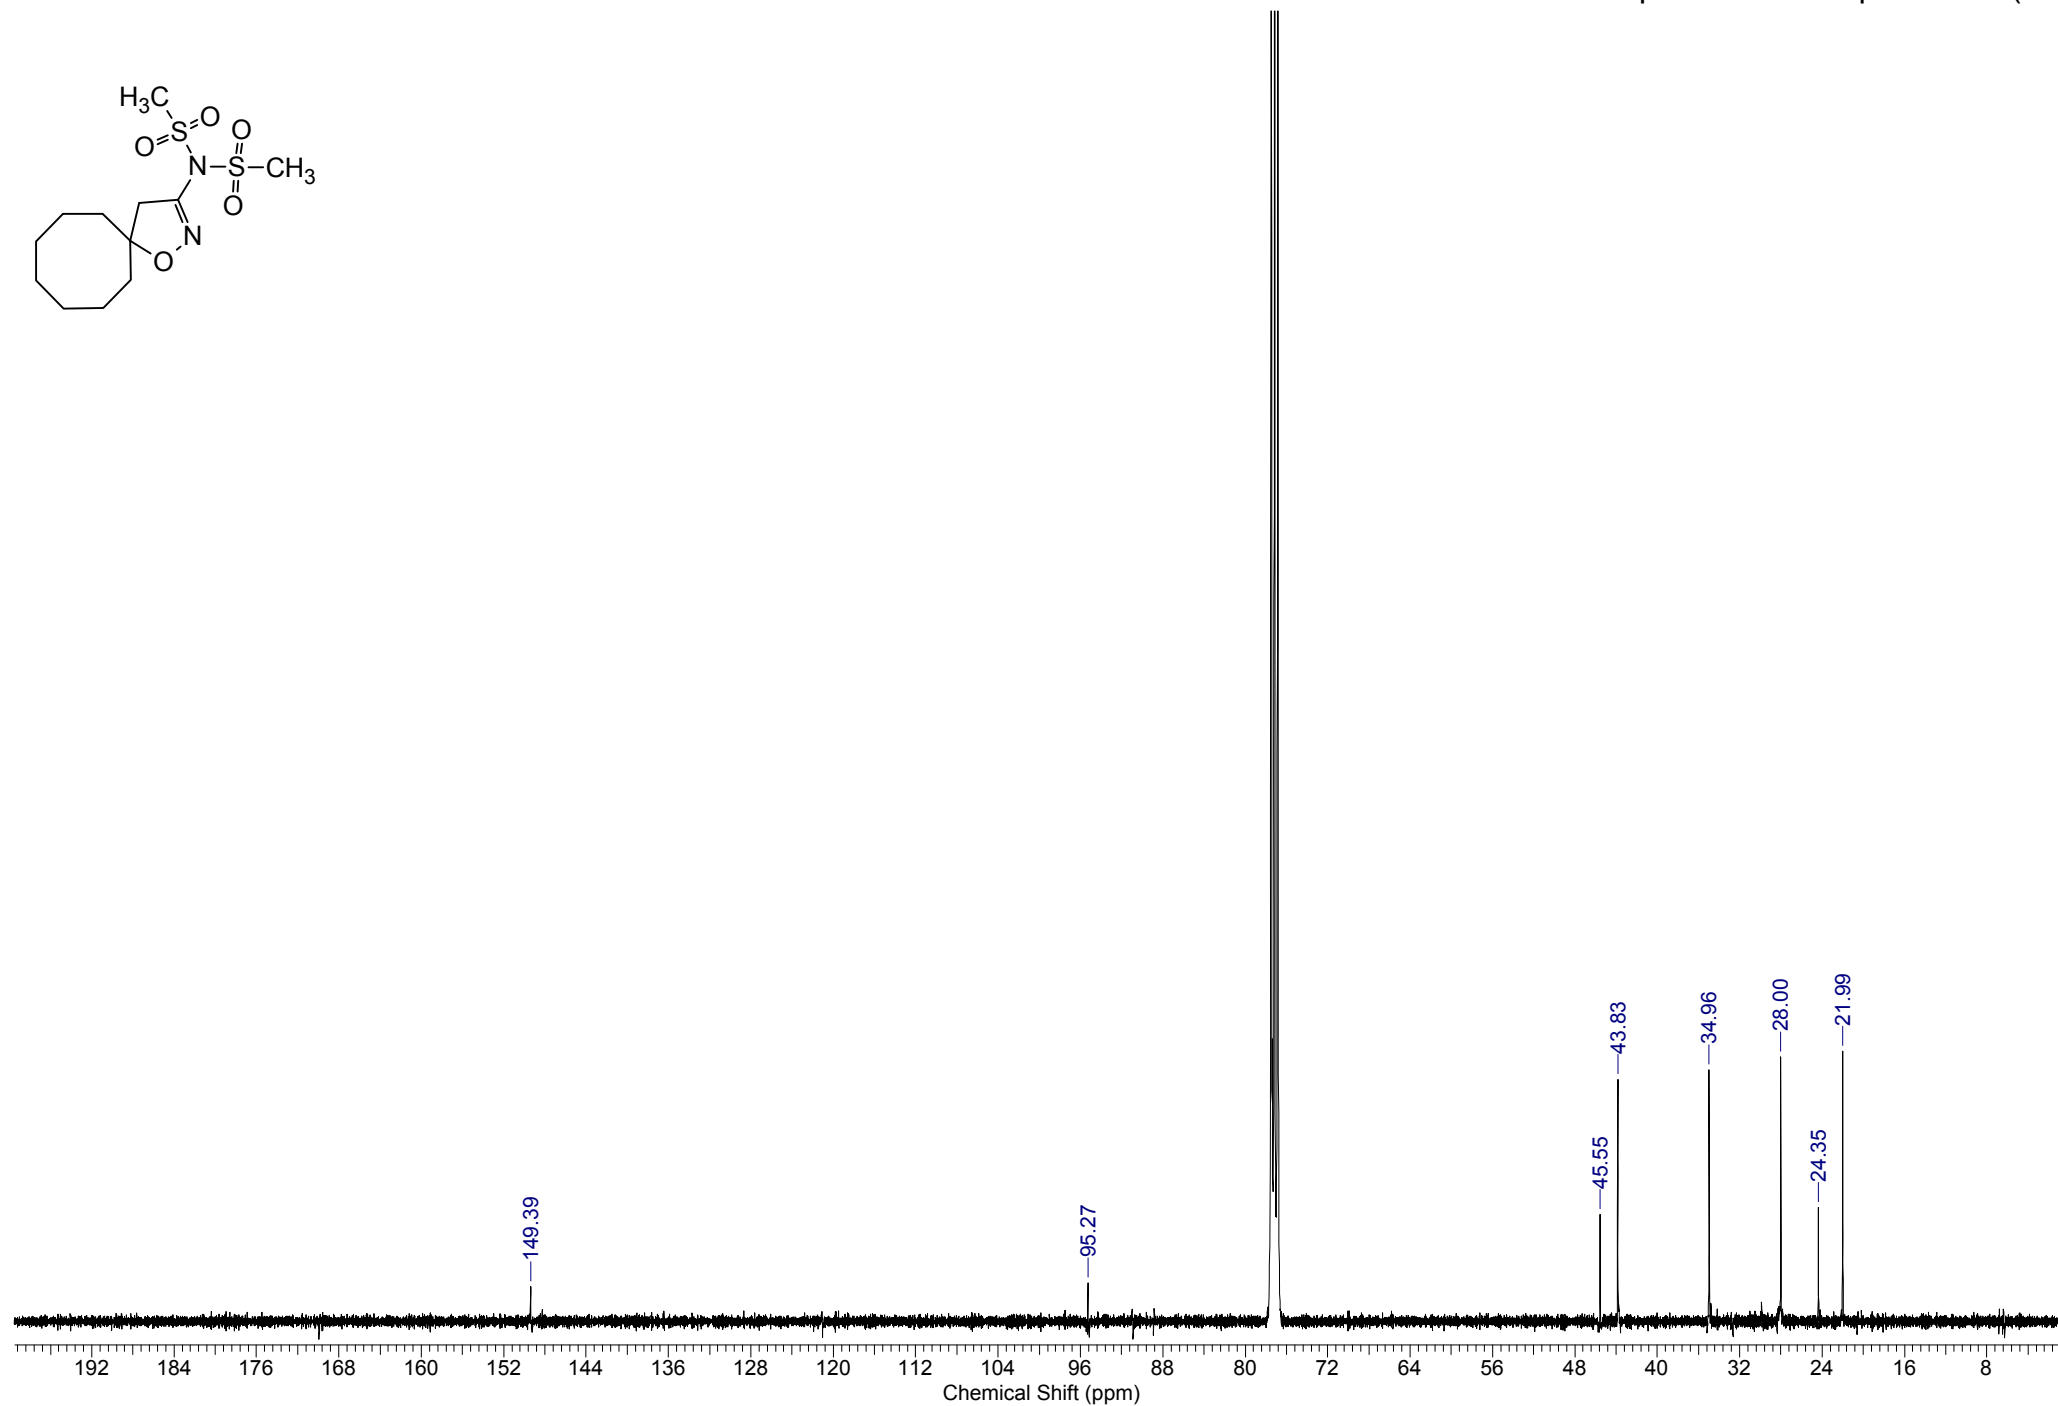



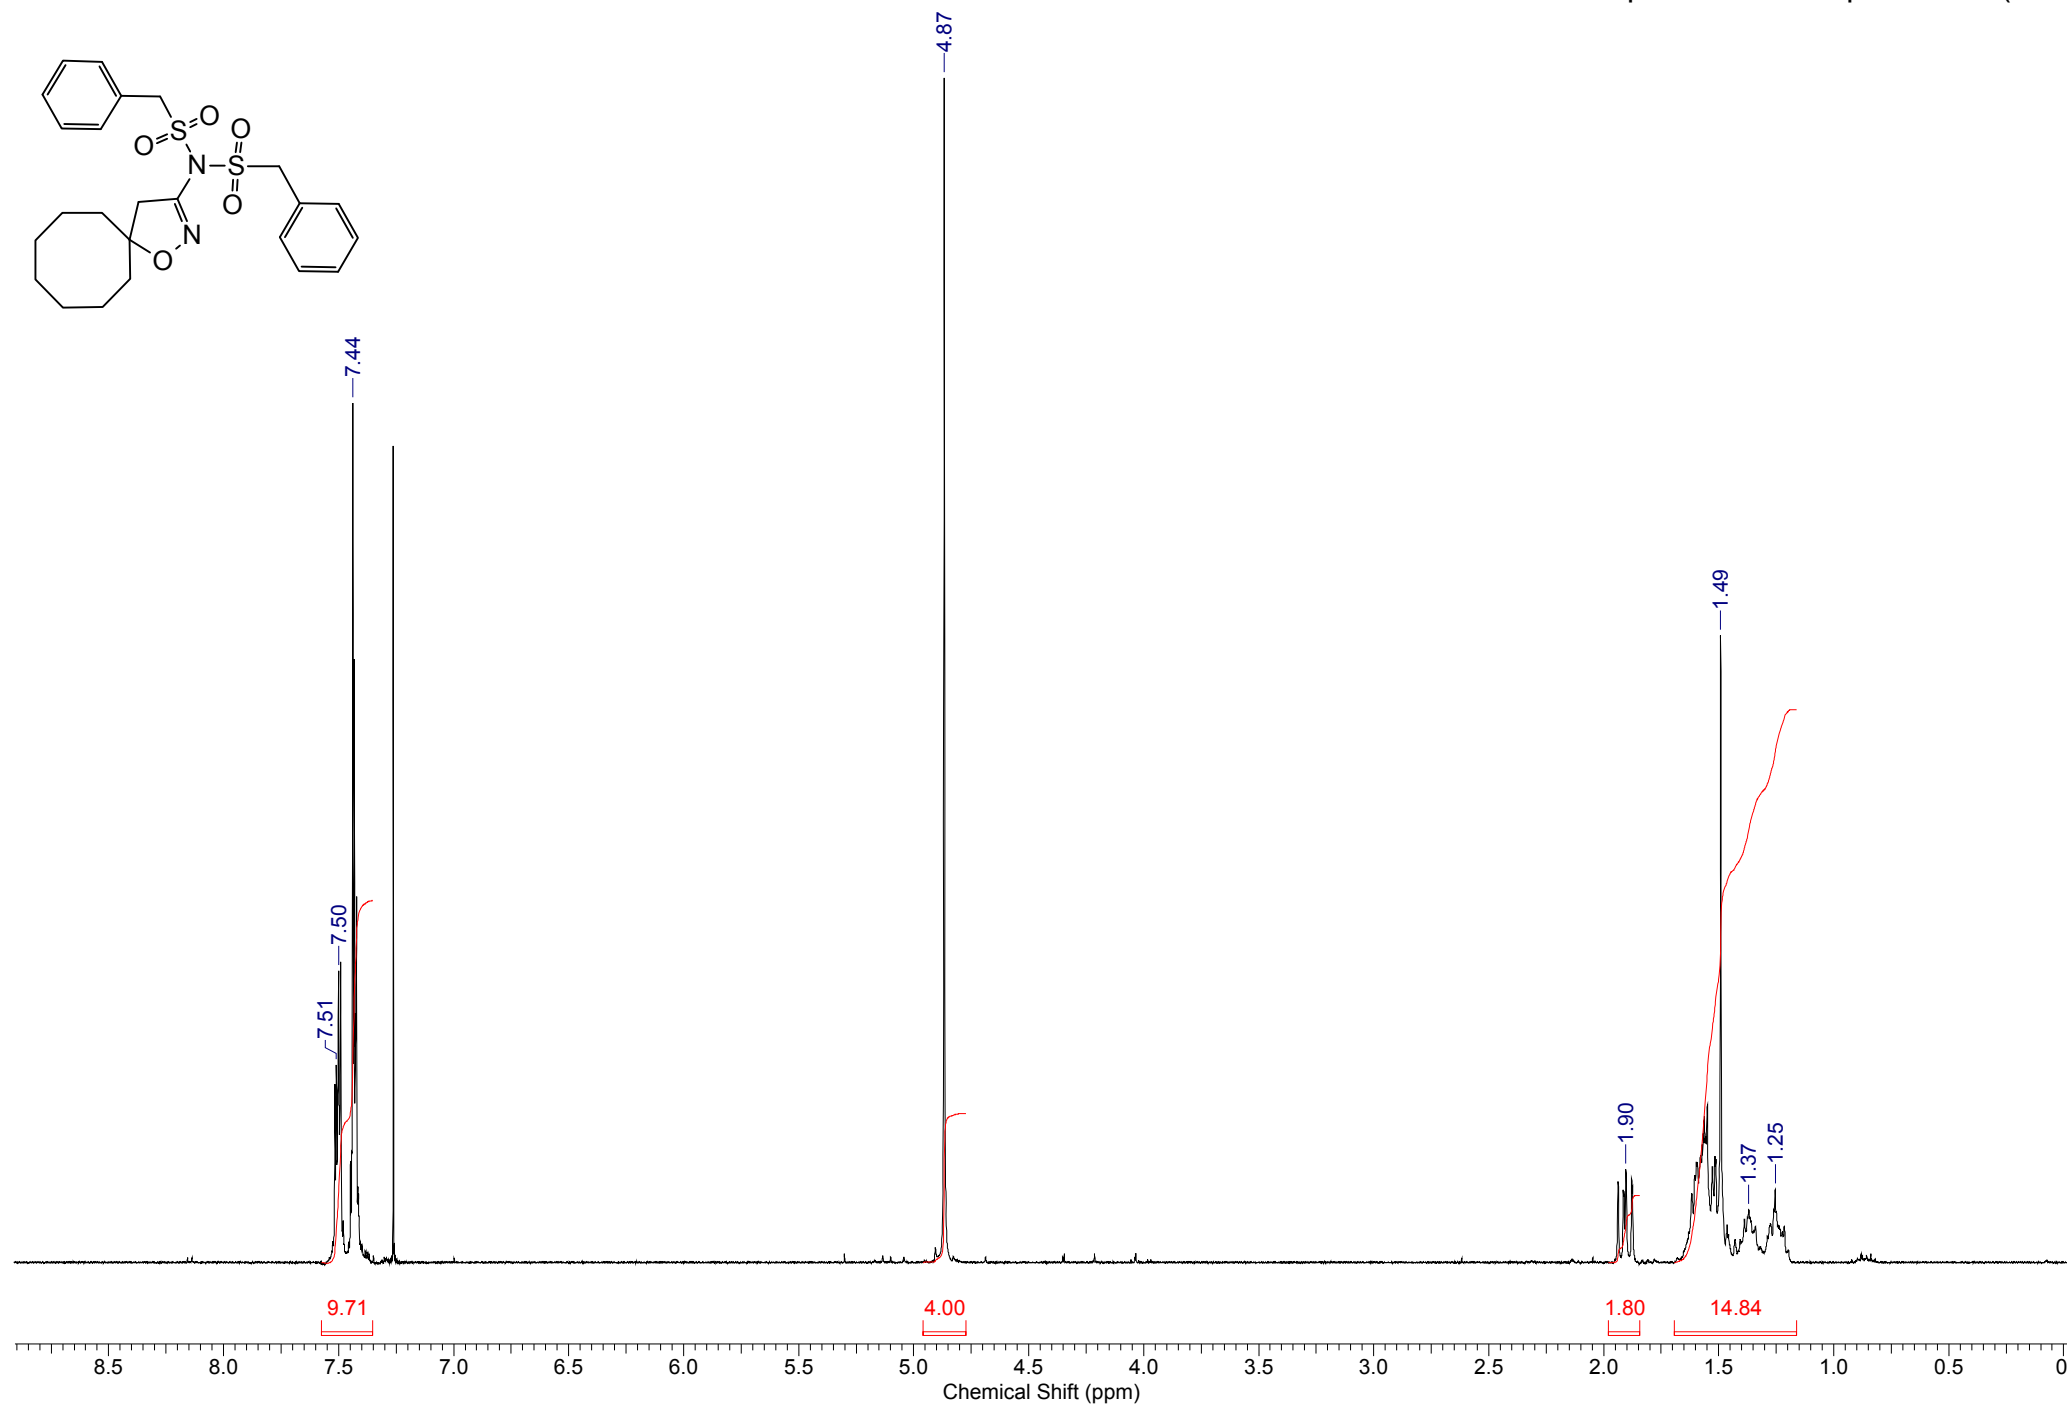

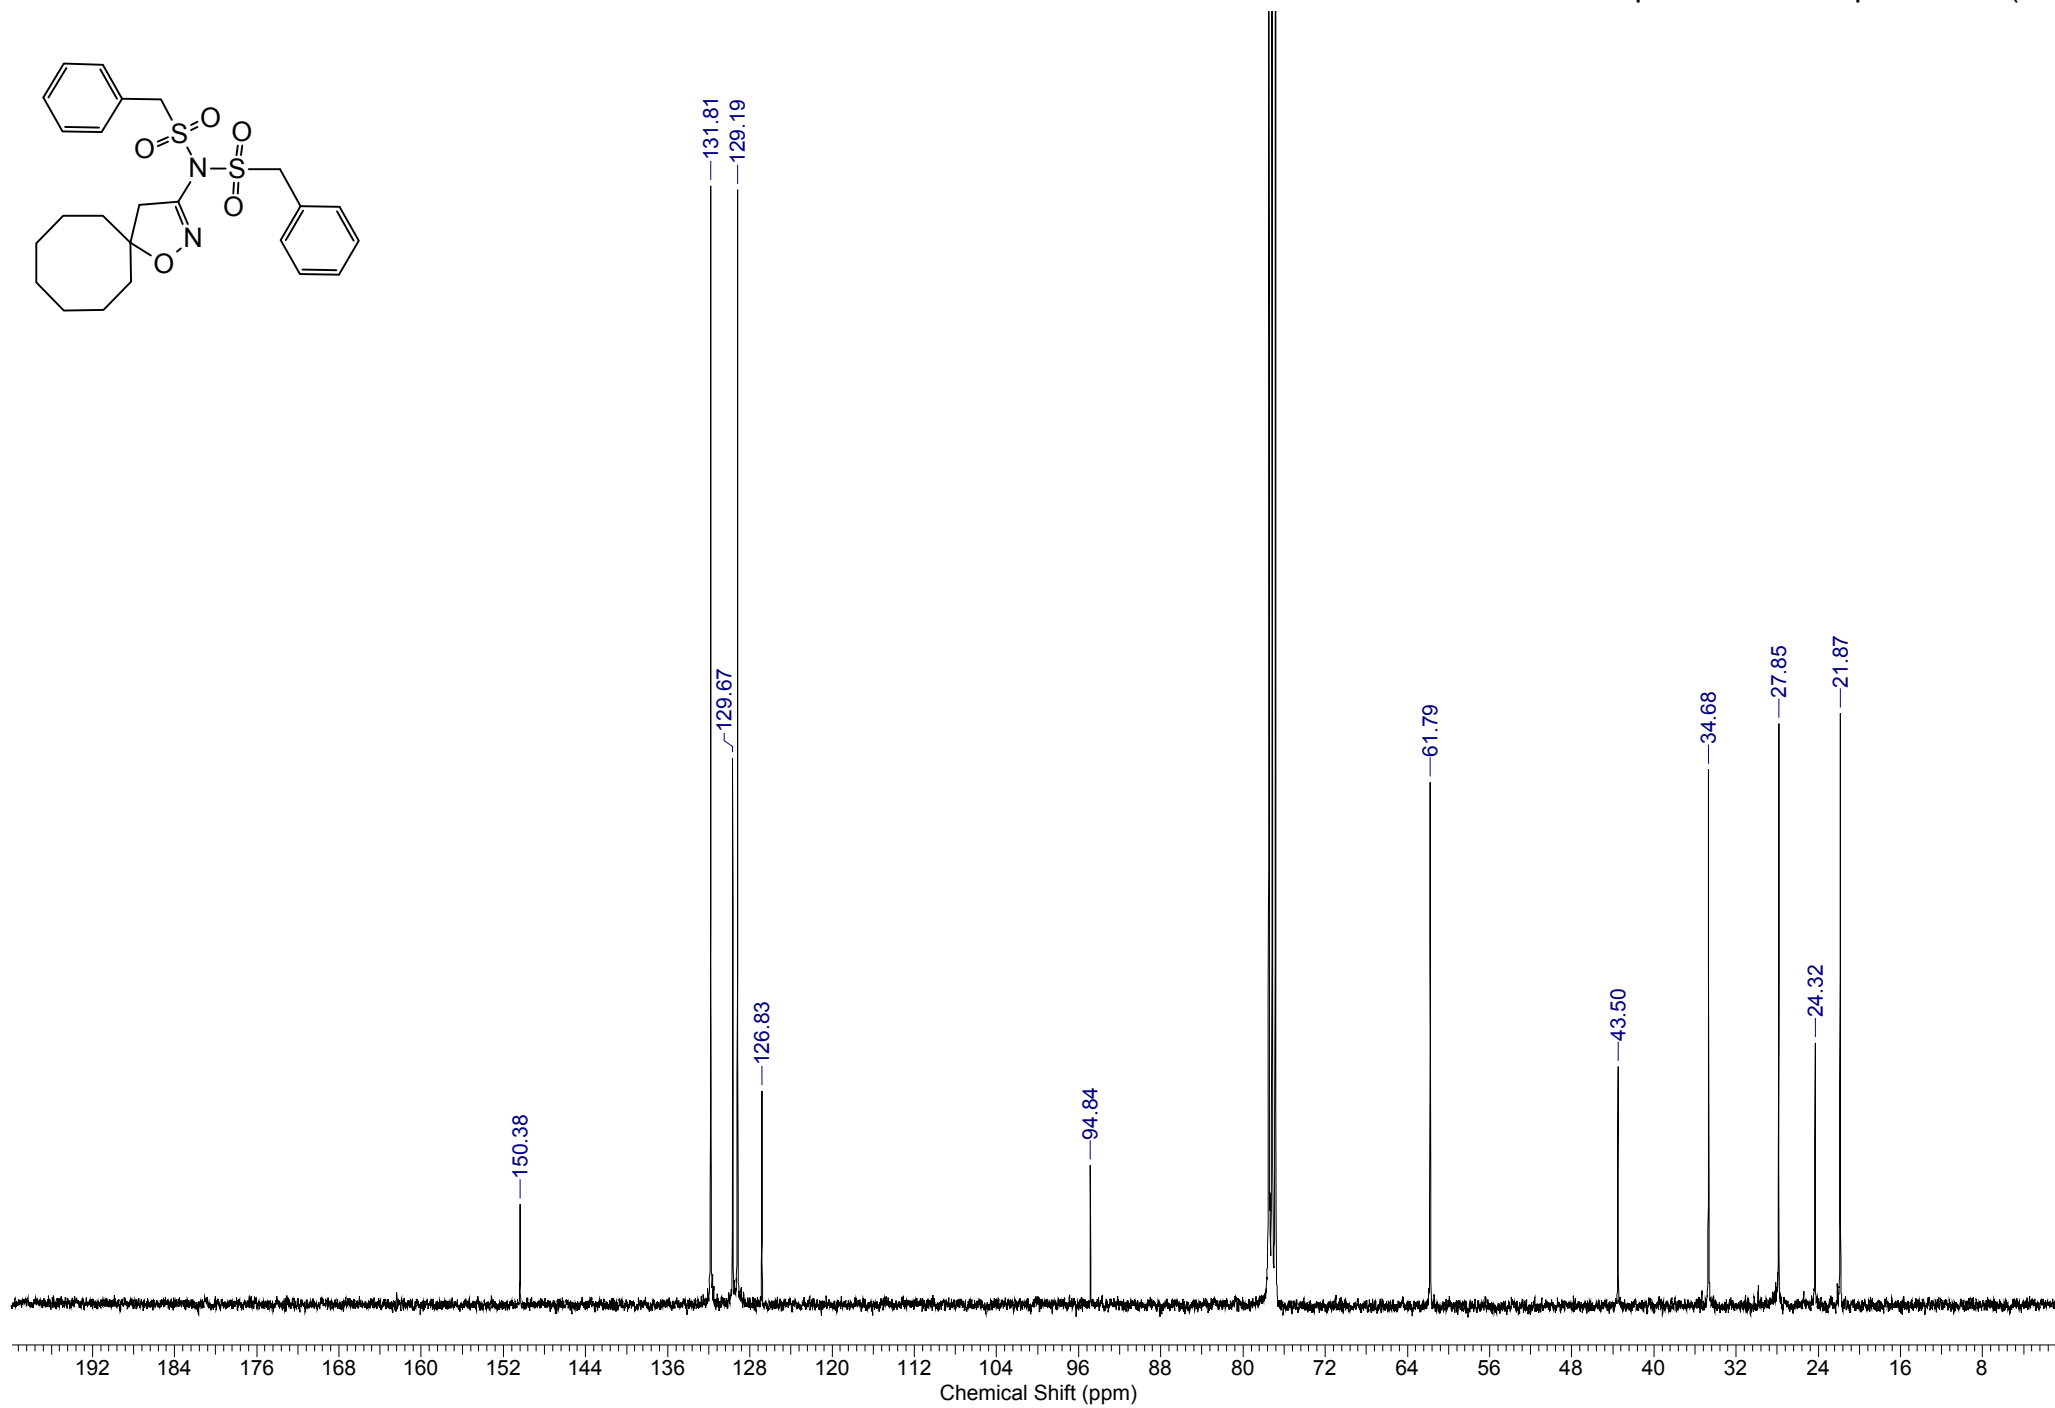

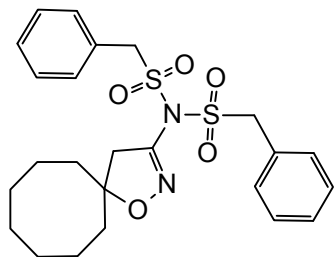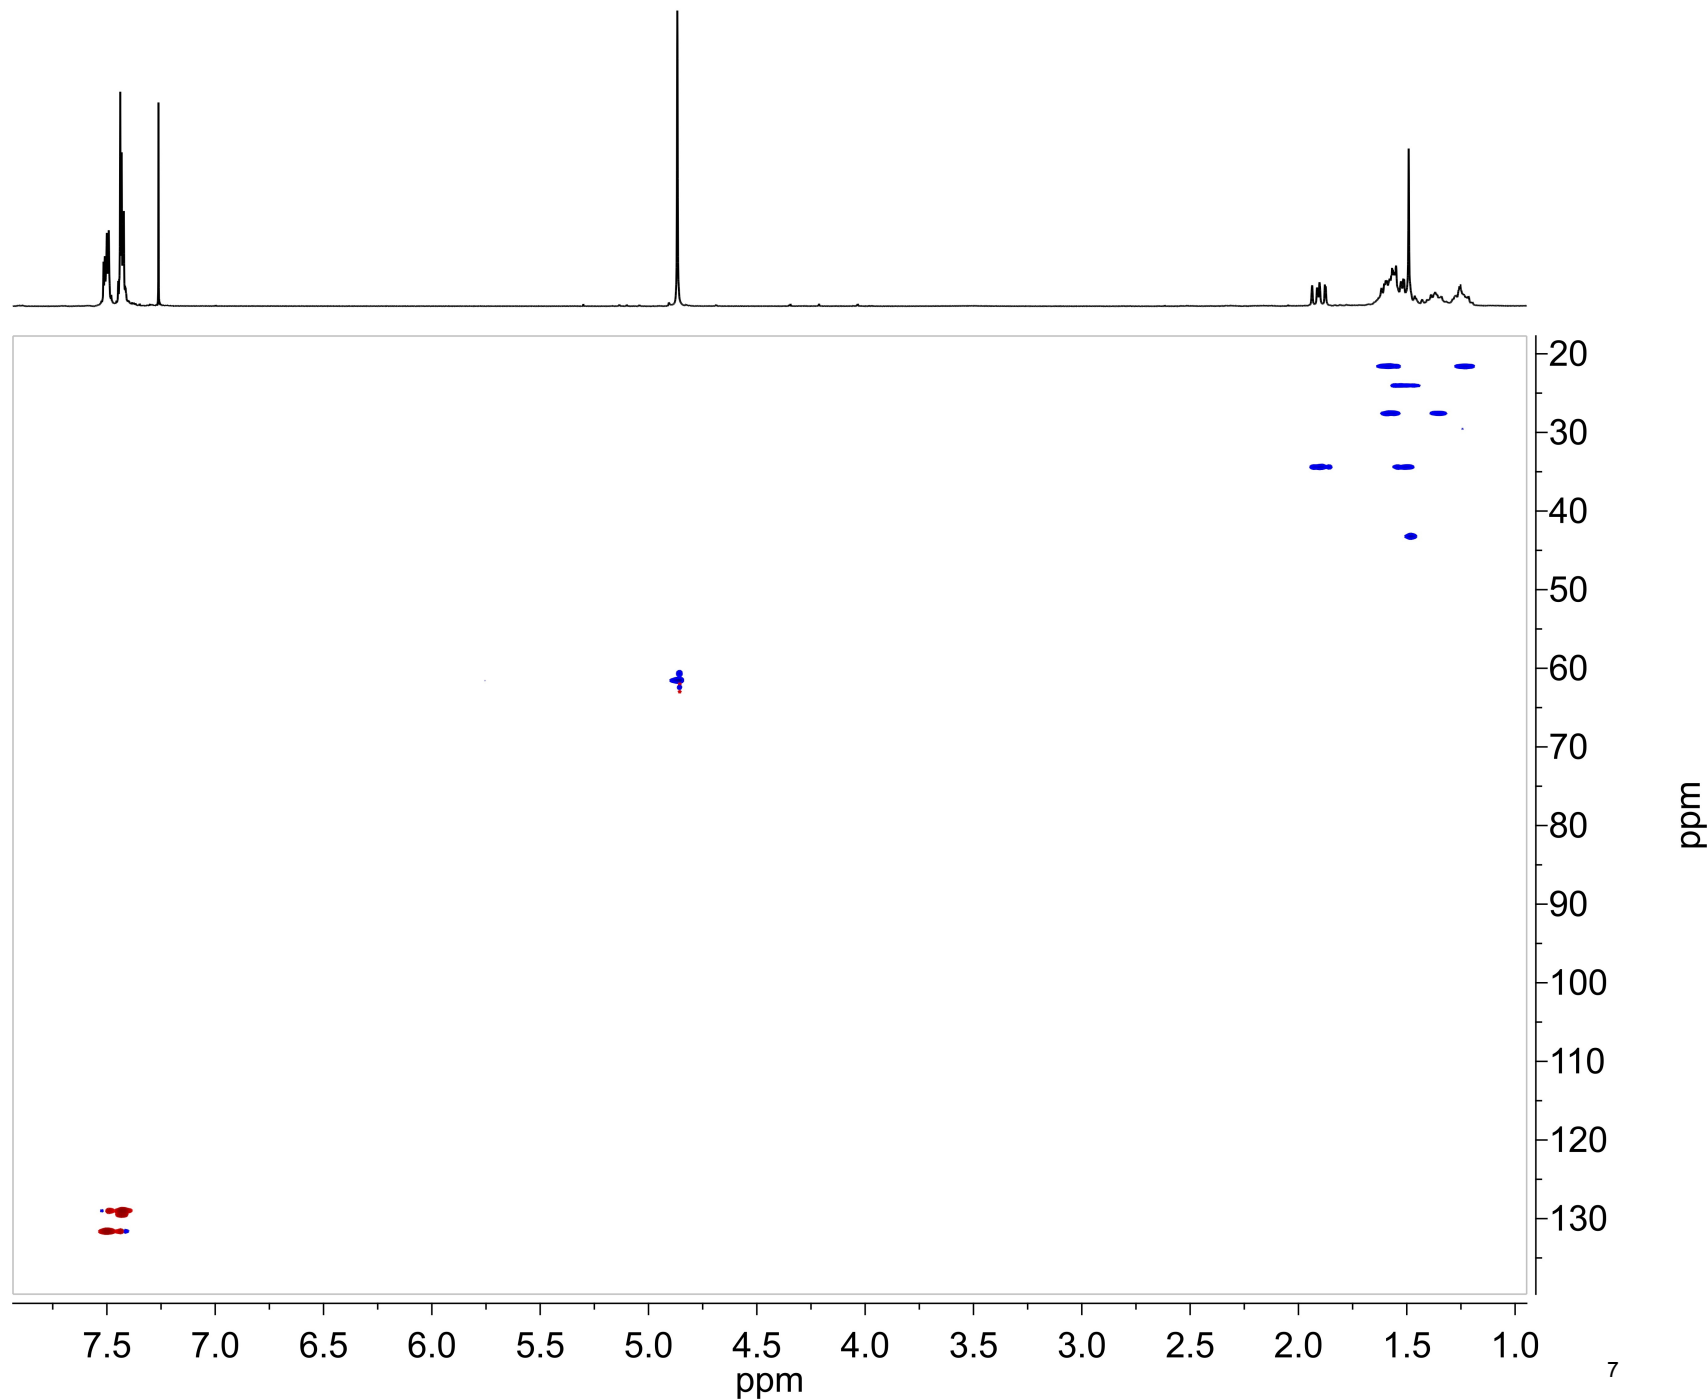

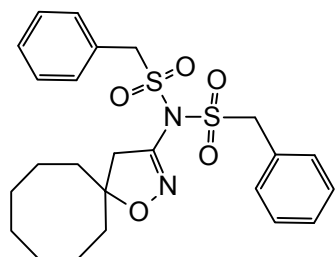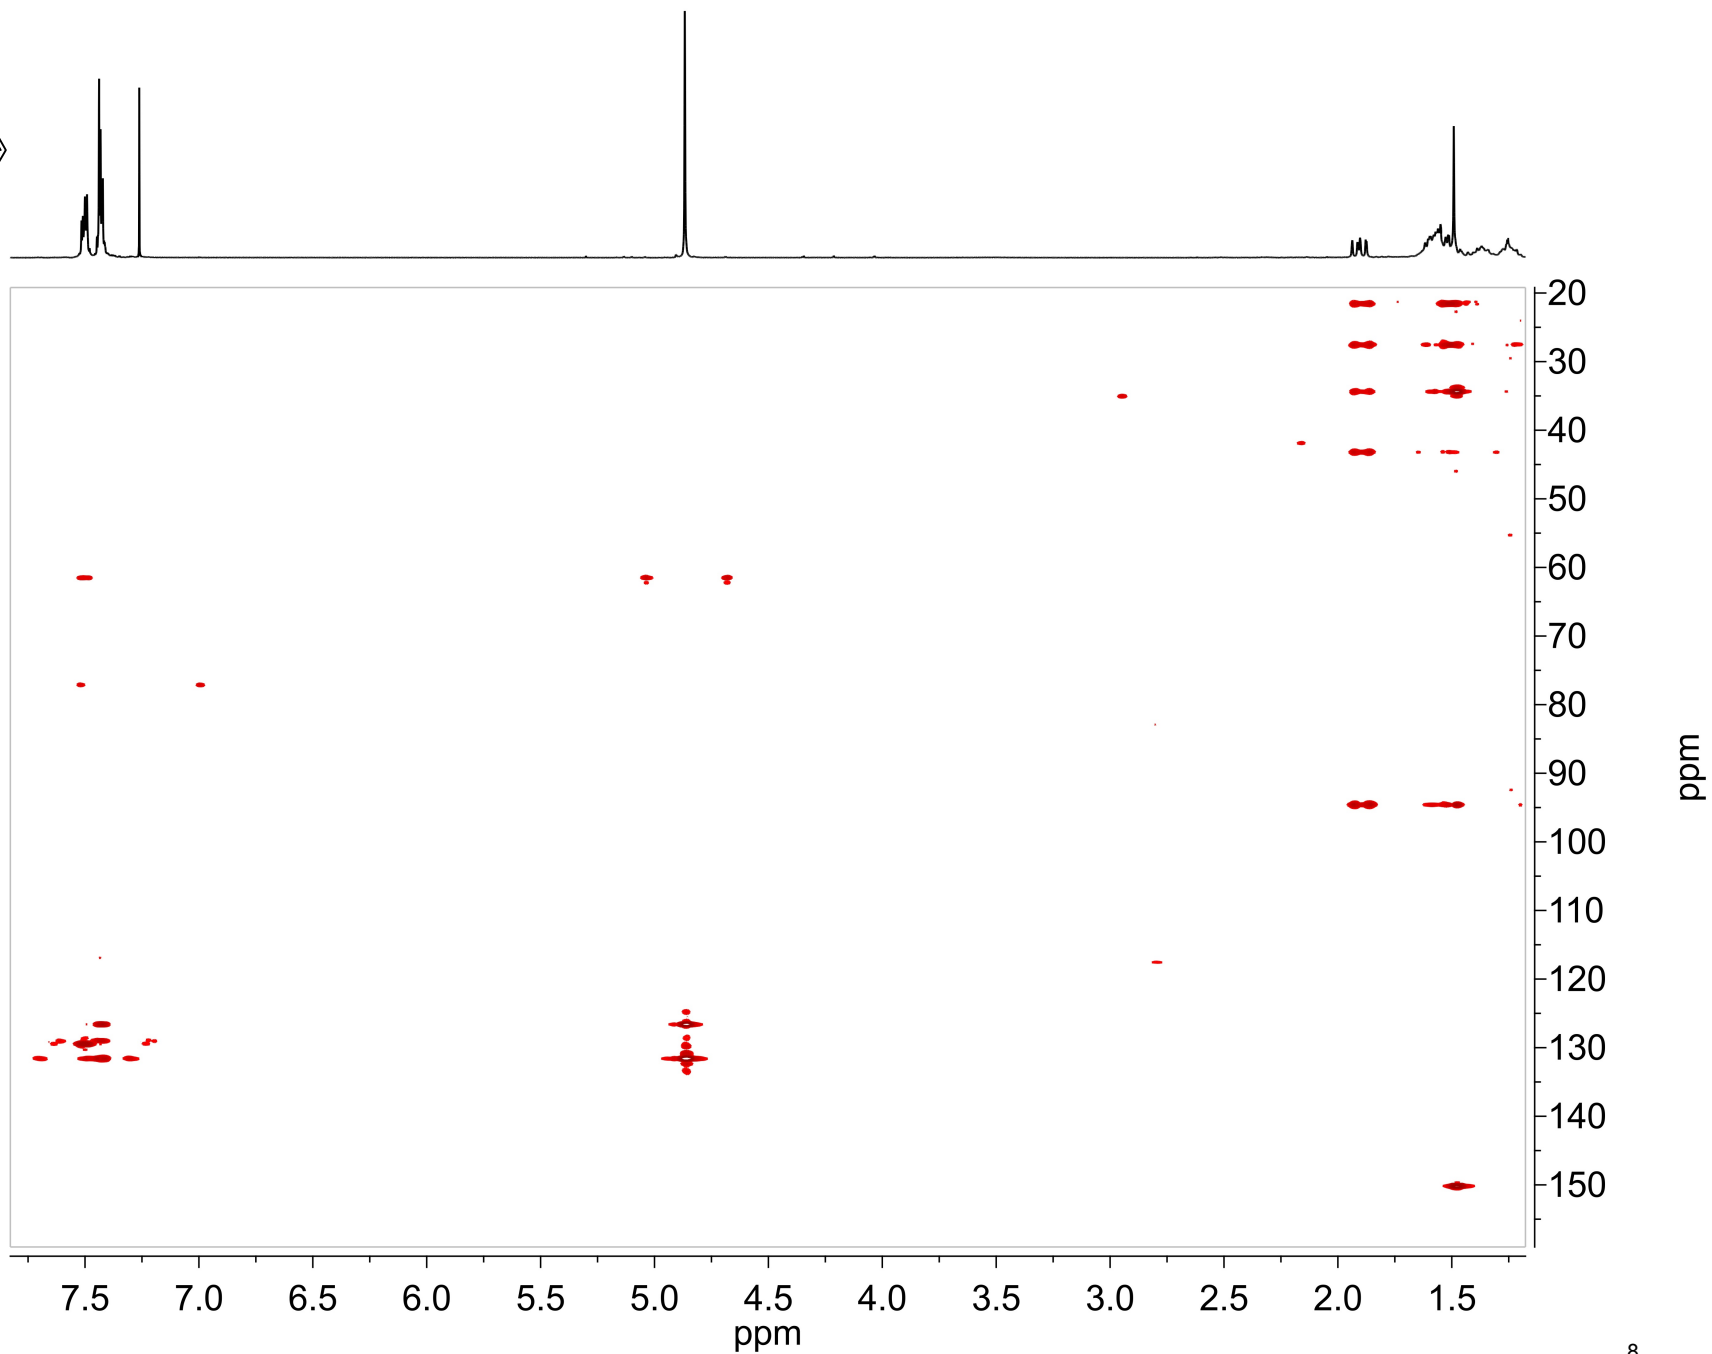

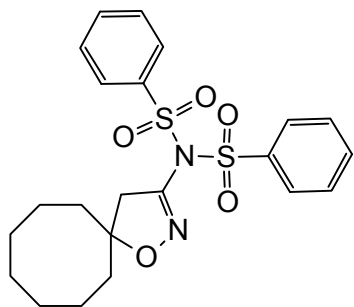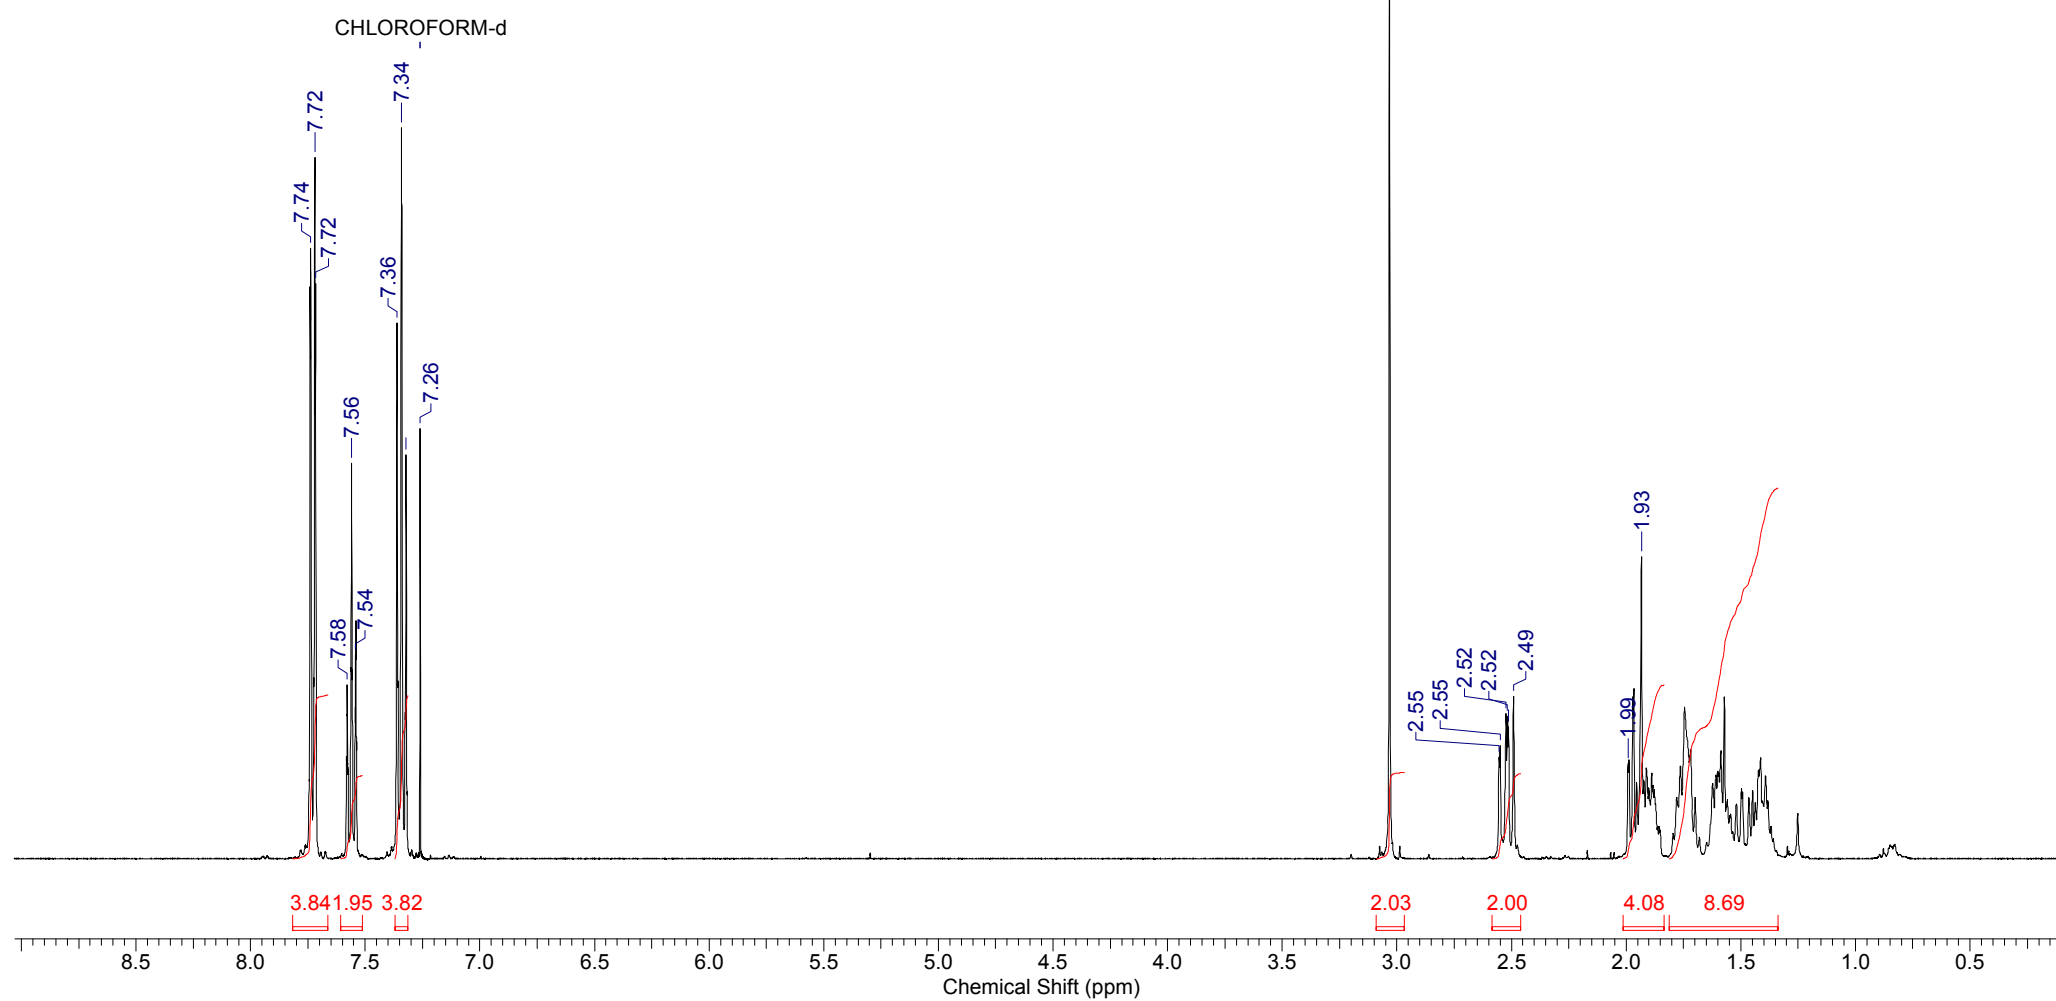

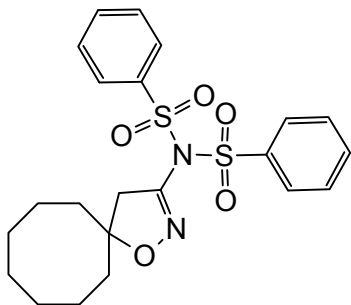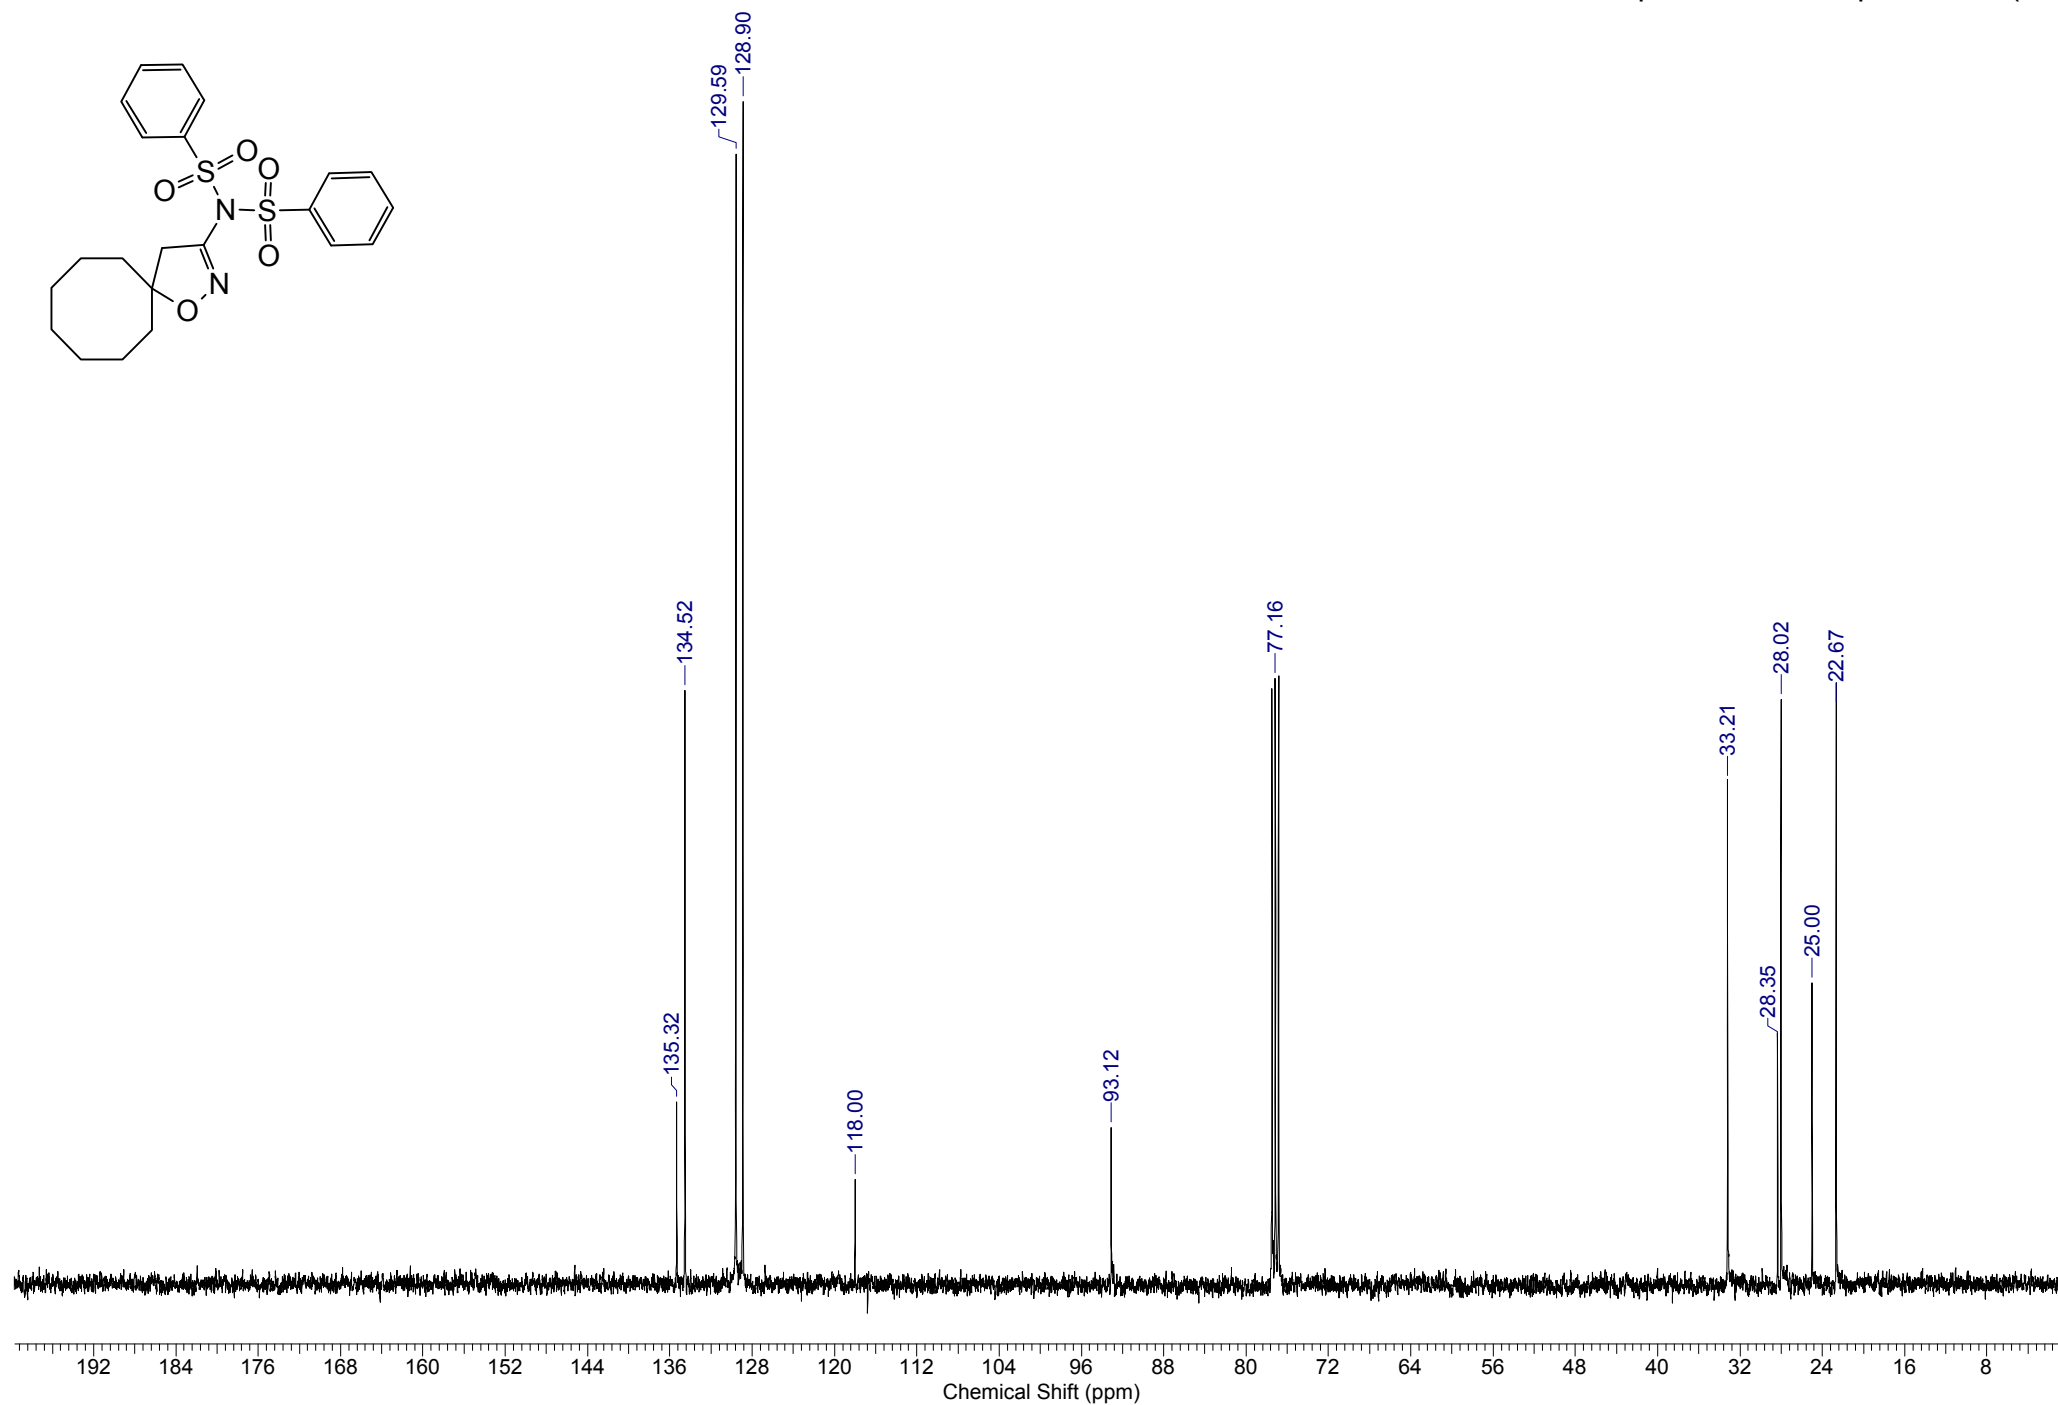

<sup>1</sup>H NMR spectrum of compound **4d** (CDCl<sub>3</sub>)

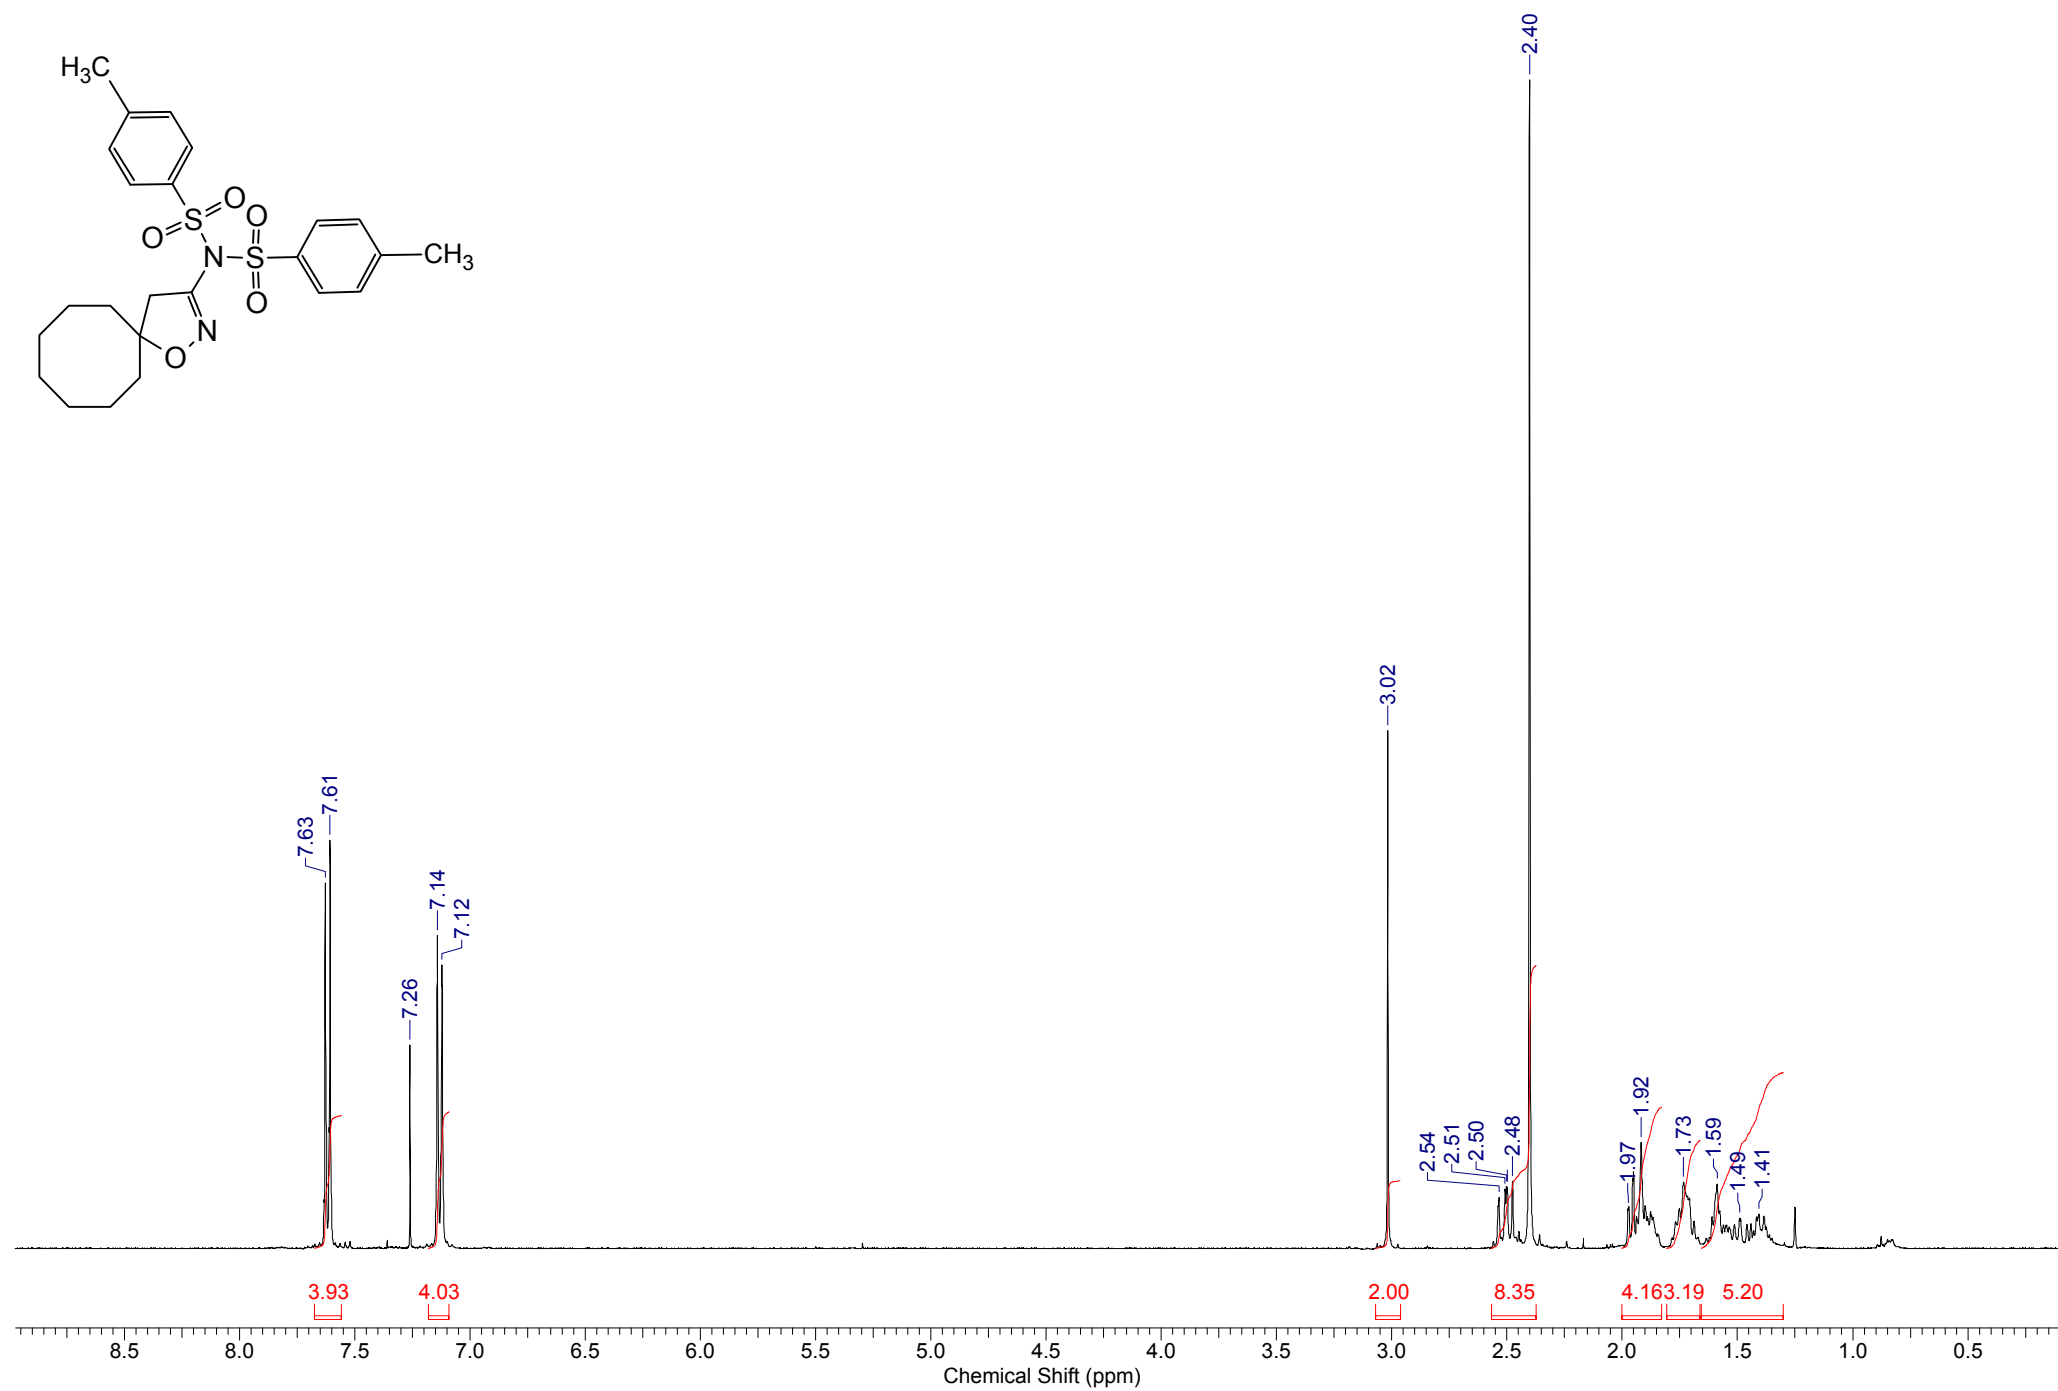

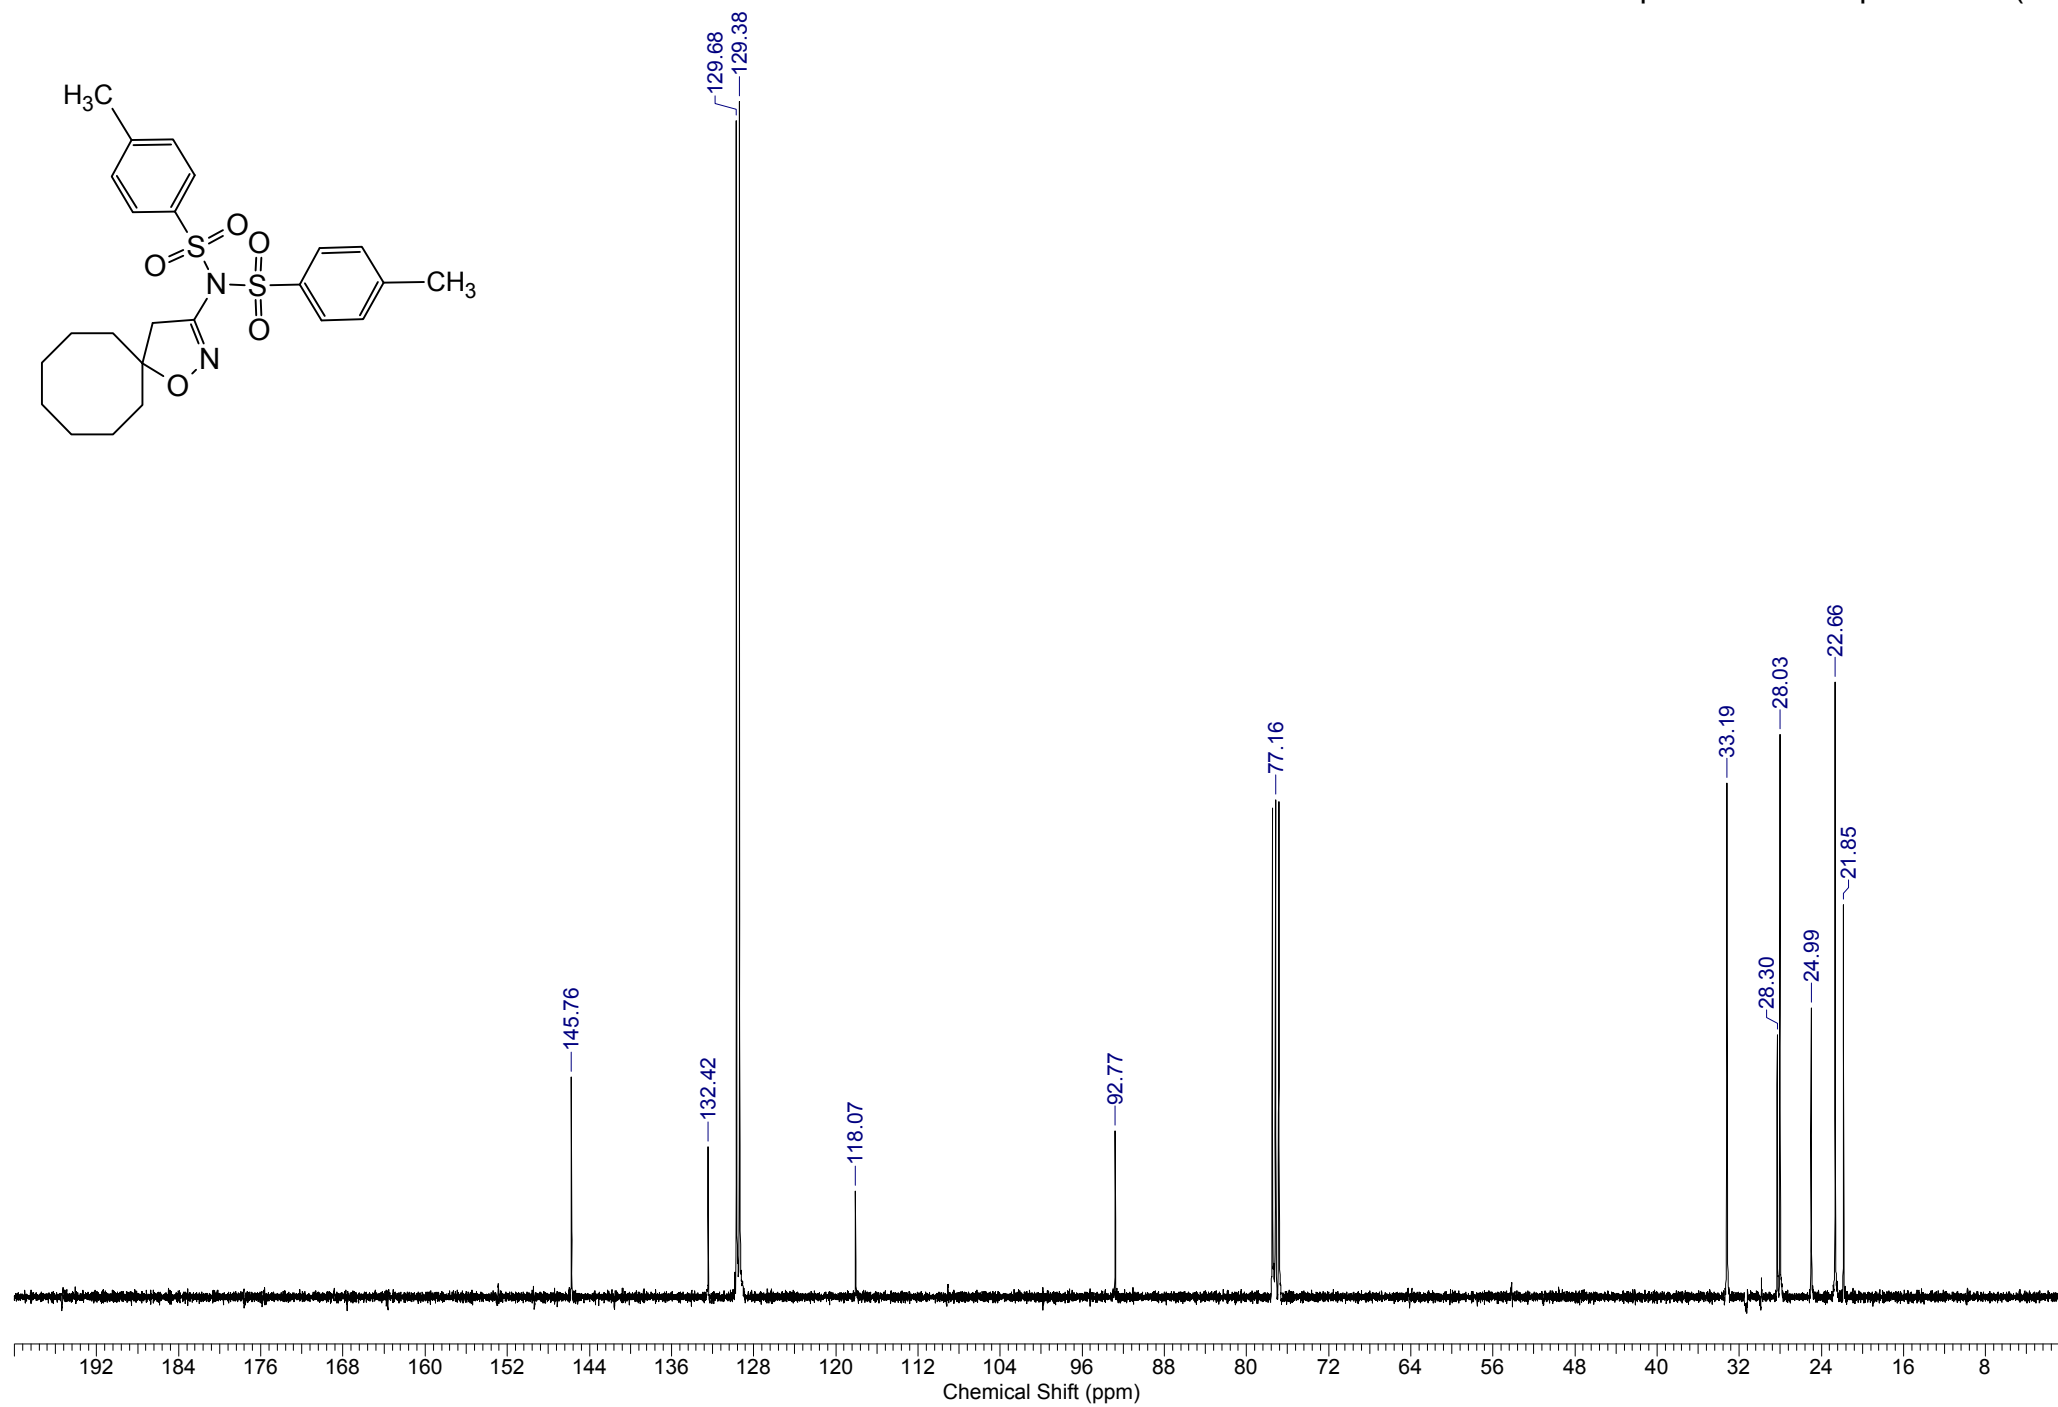



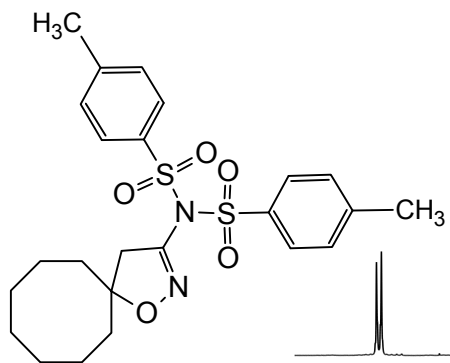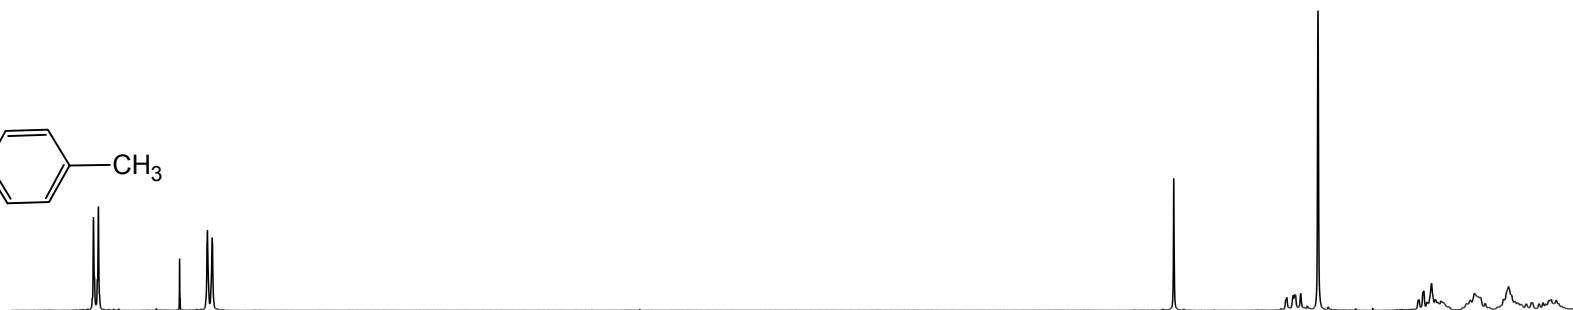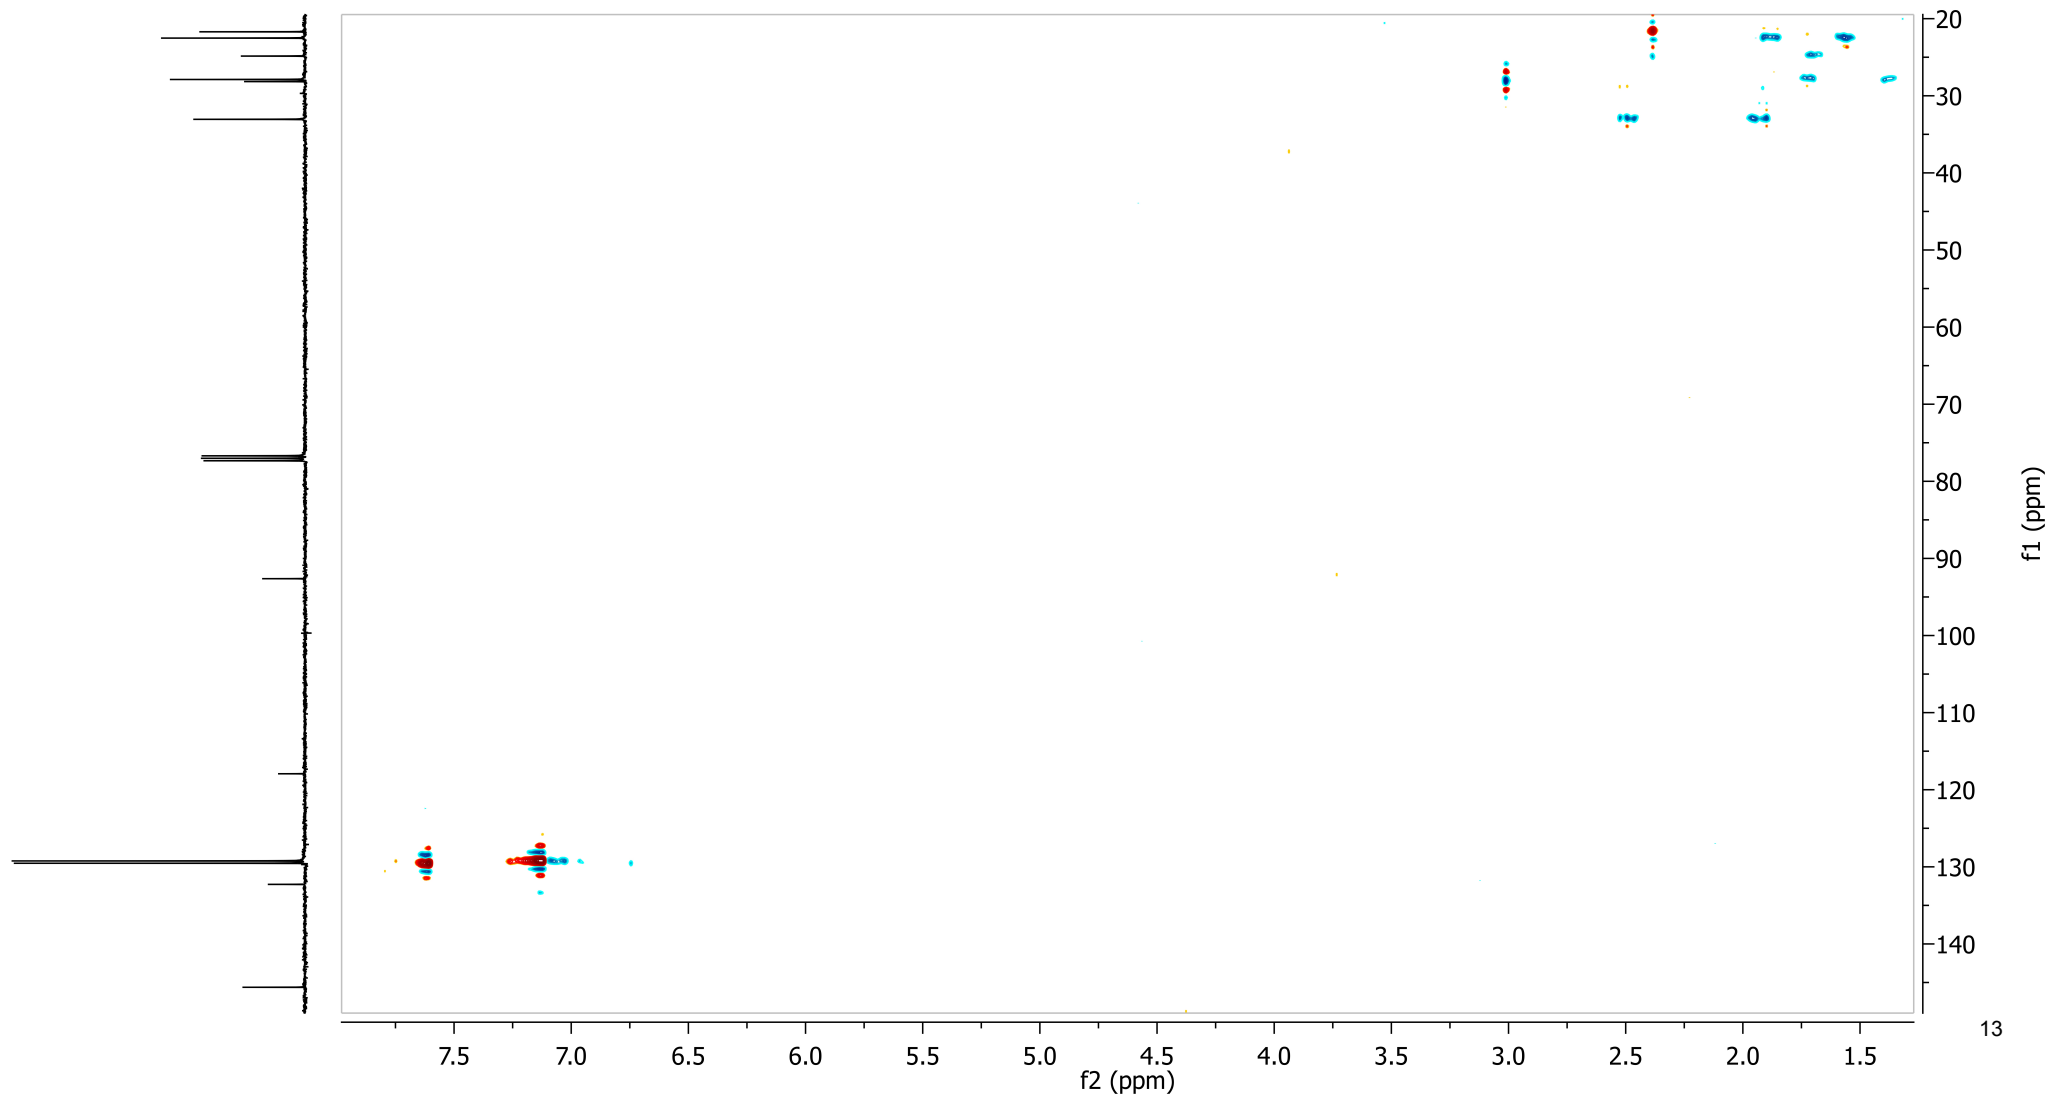

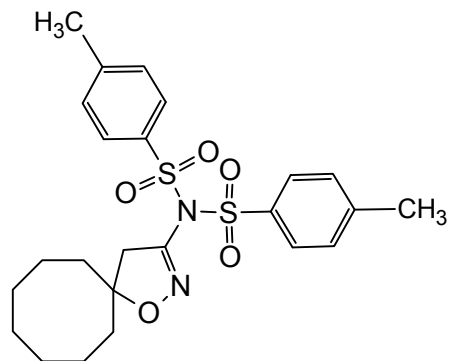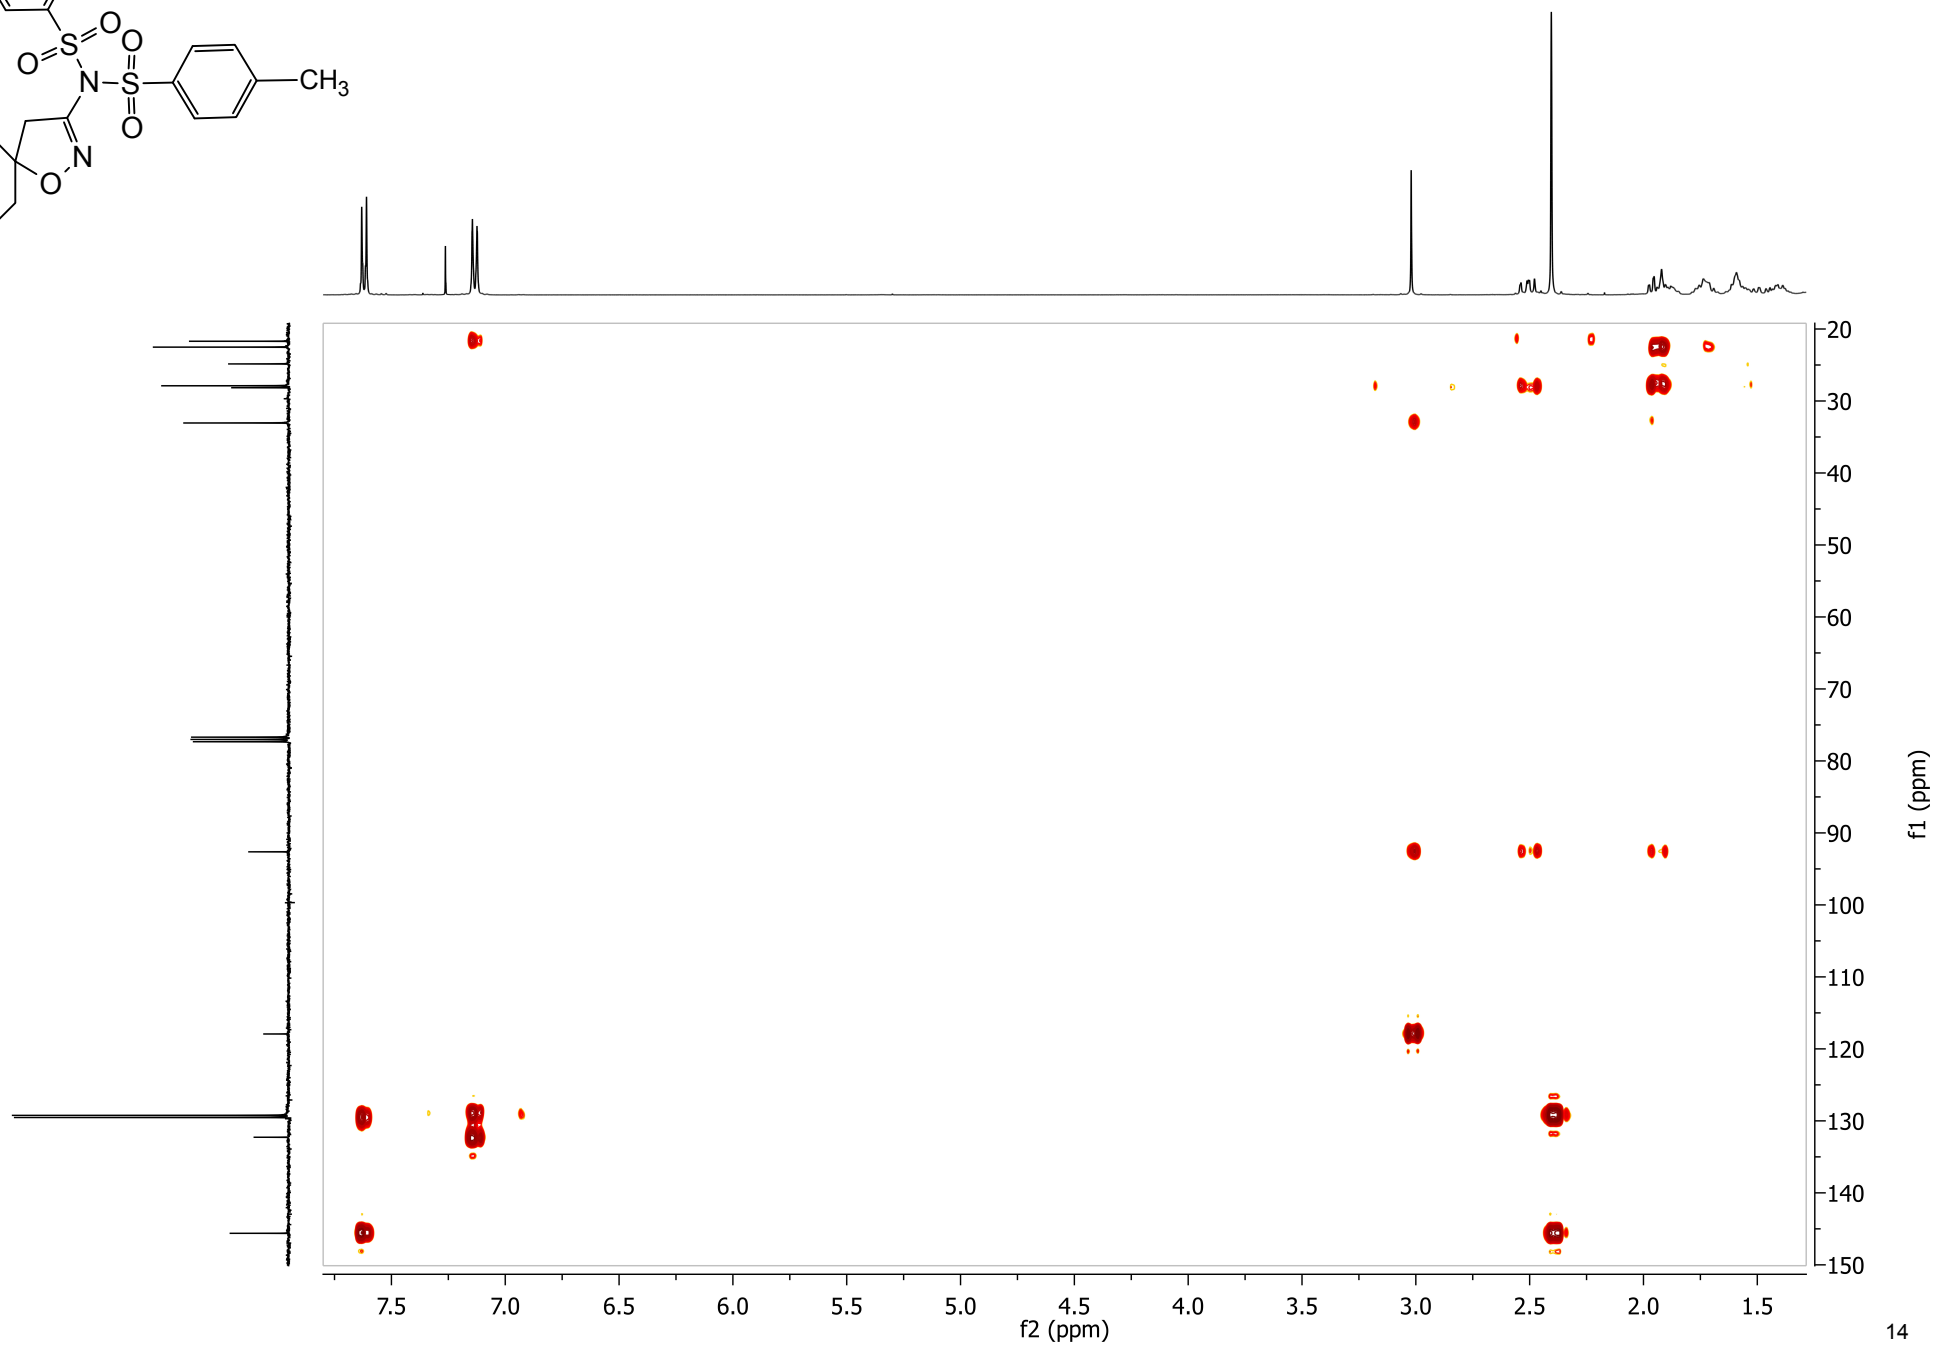

<sup>1</sup>H NMR spectrum of compound **4e** (CDCl<sub>3</sub>)

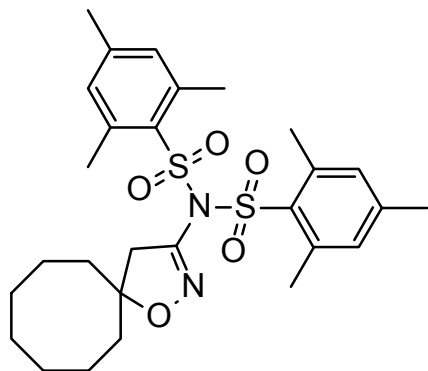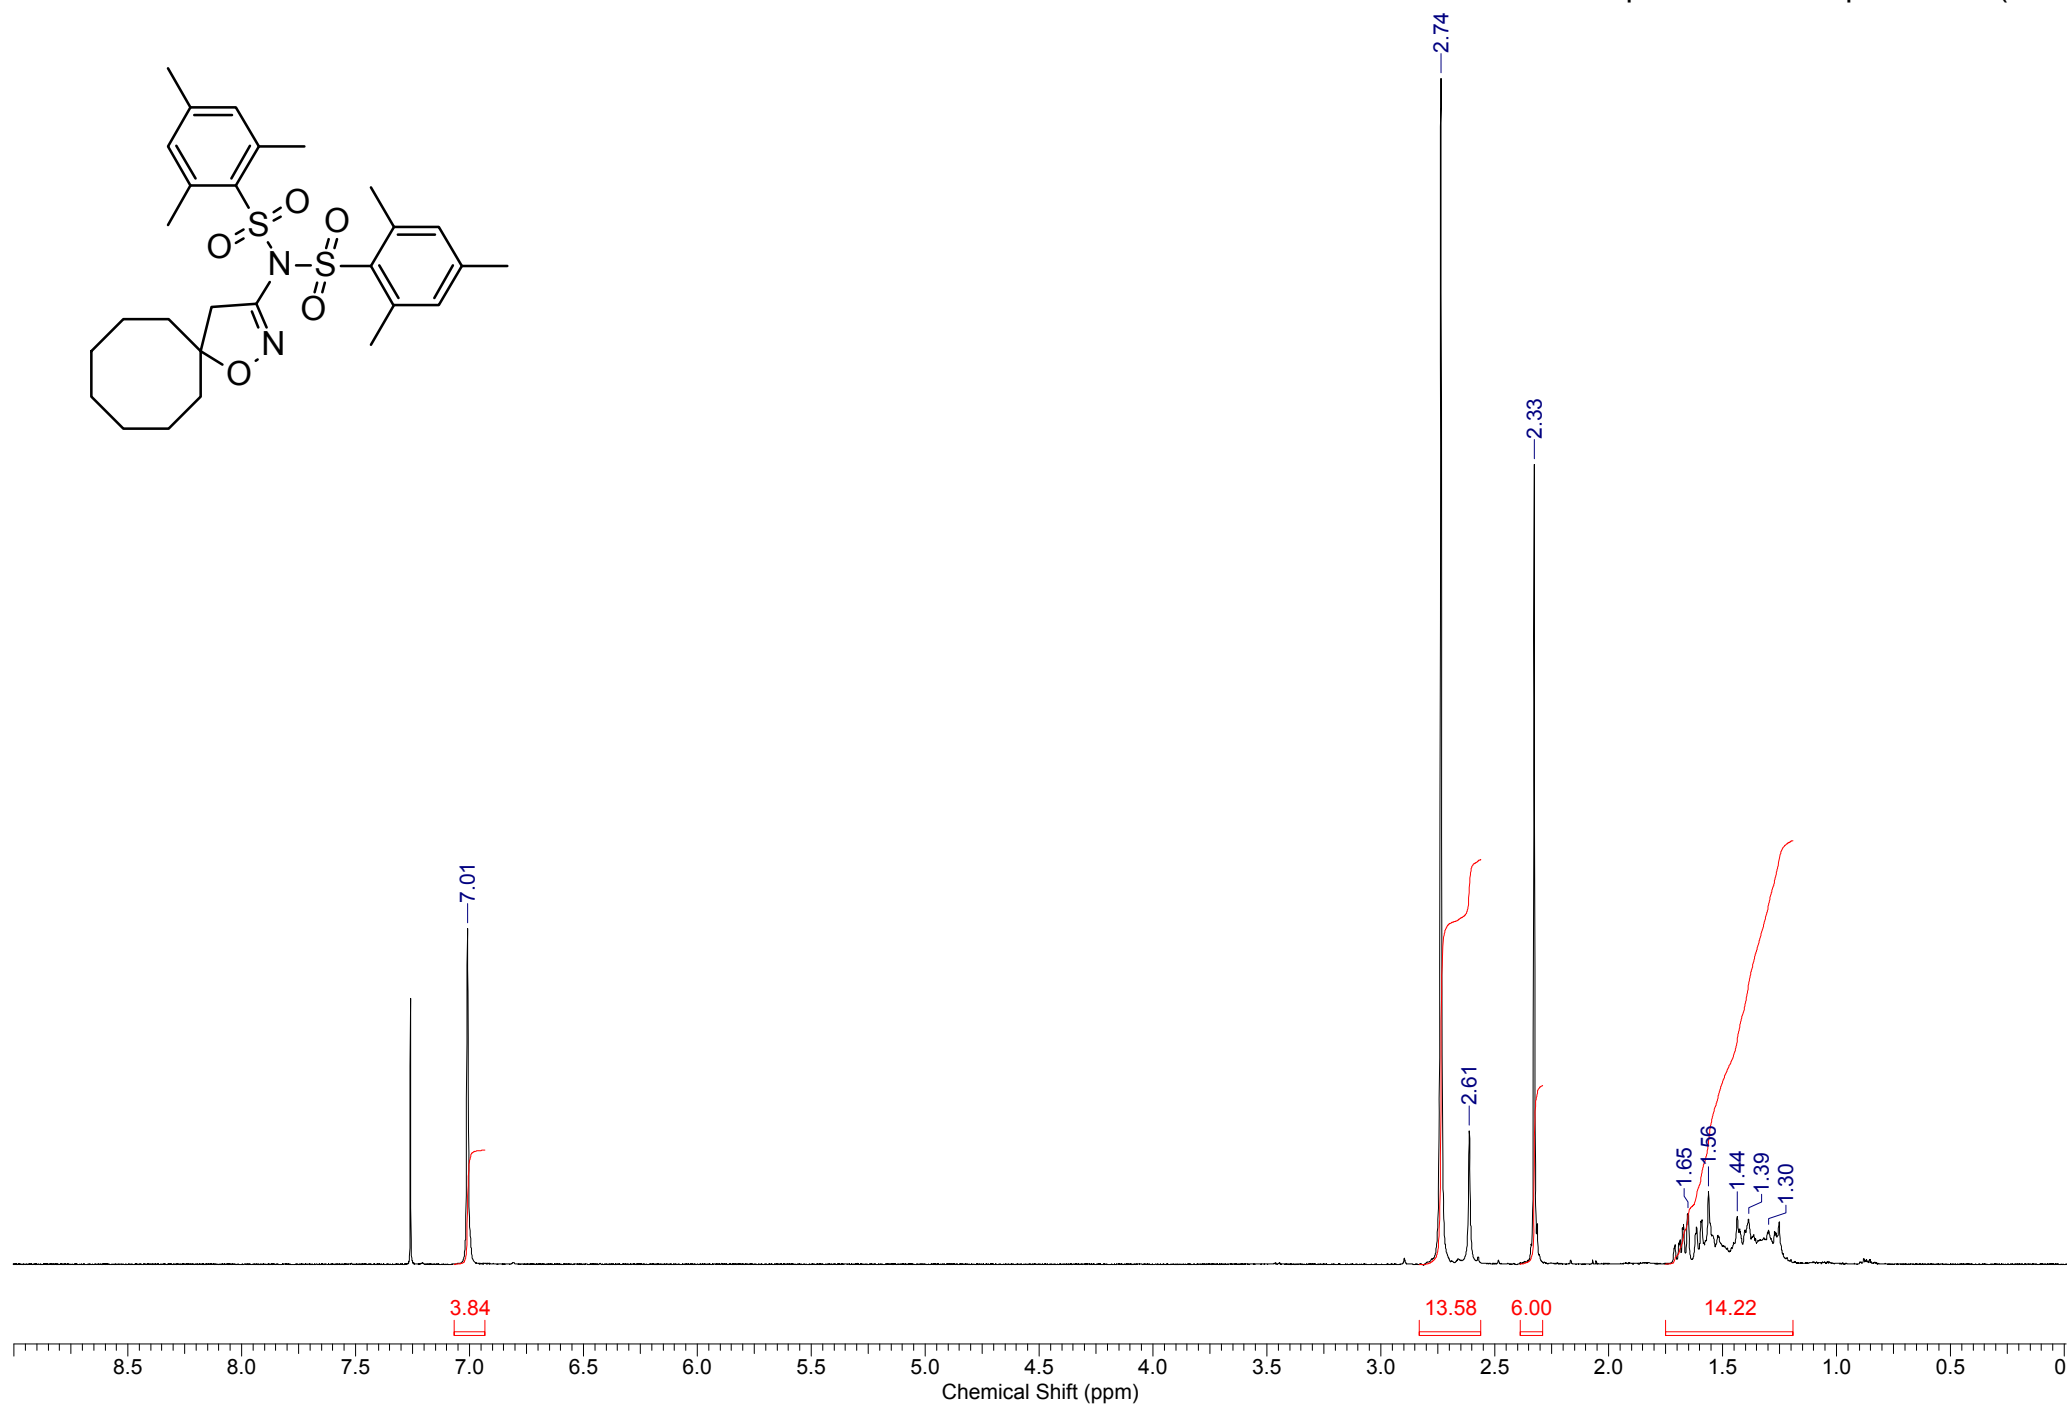

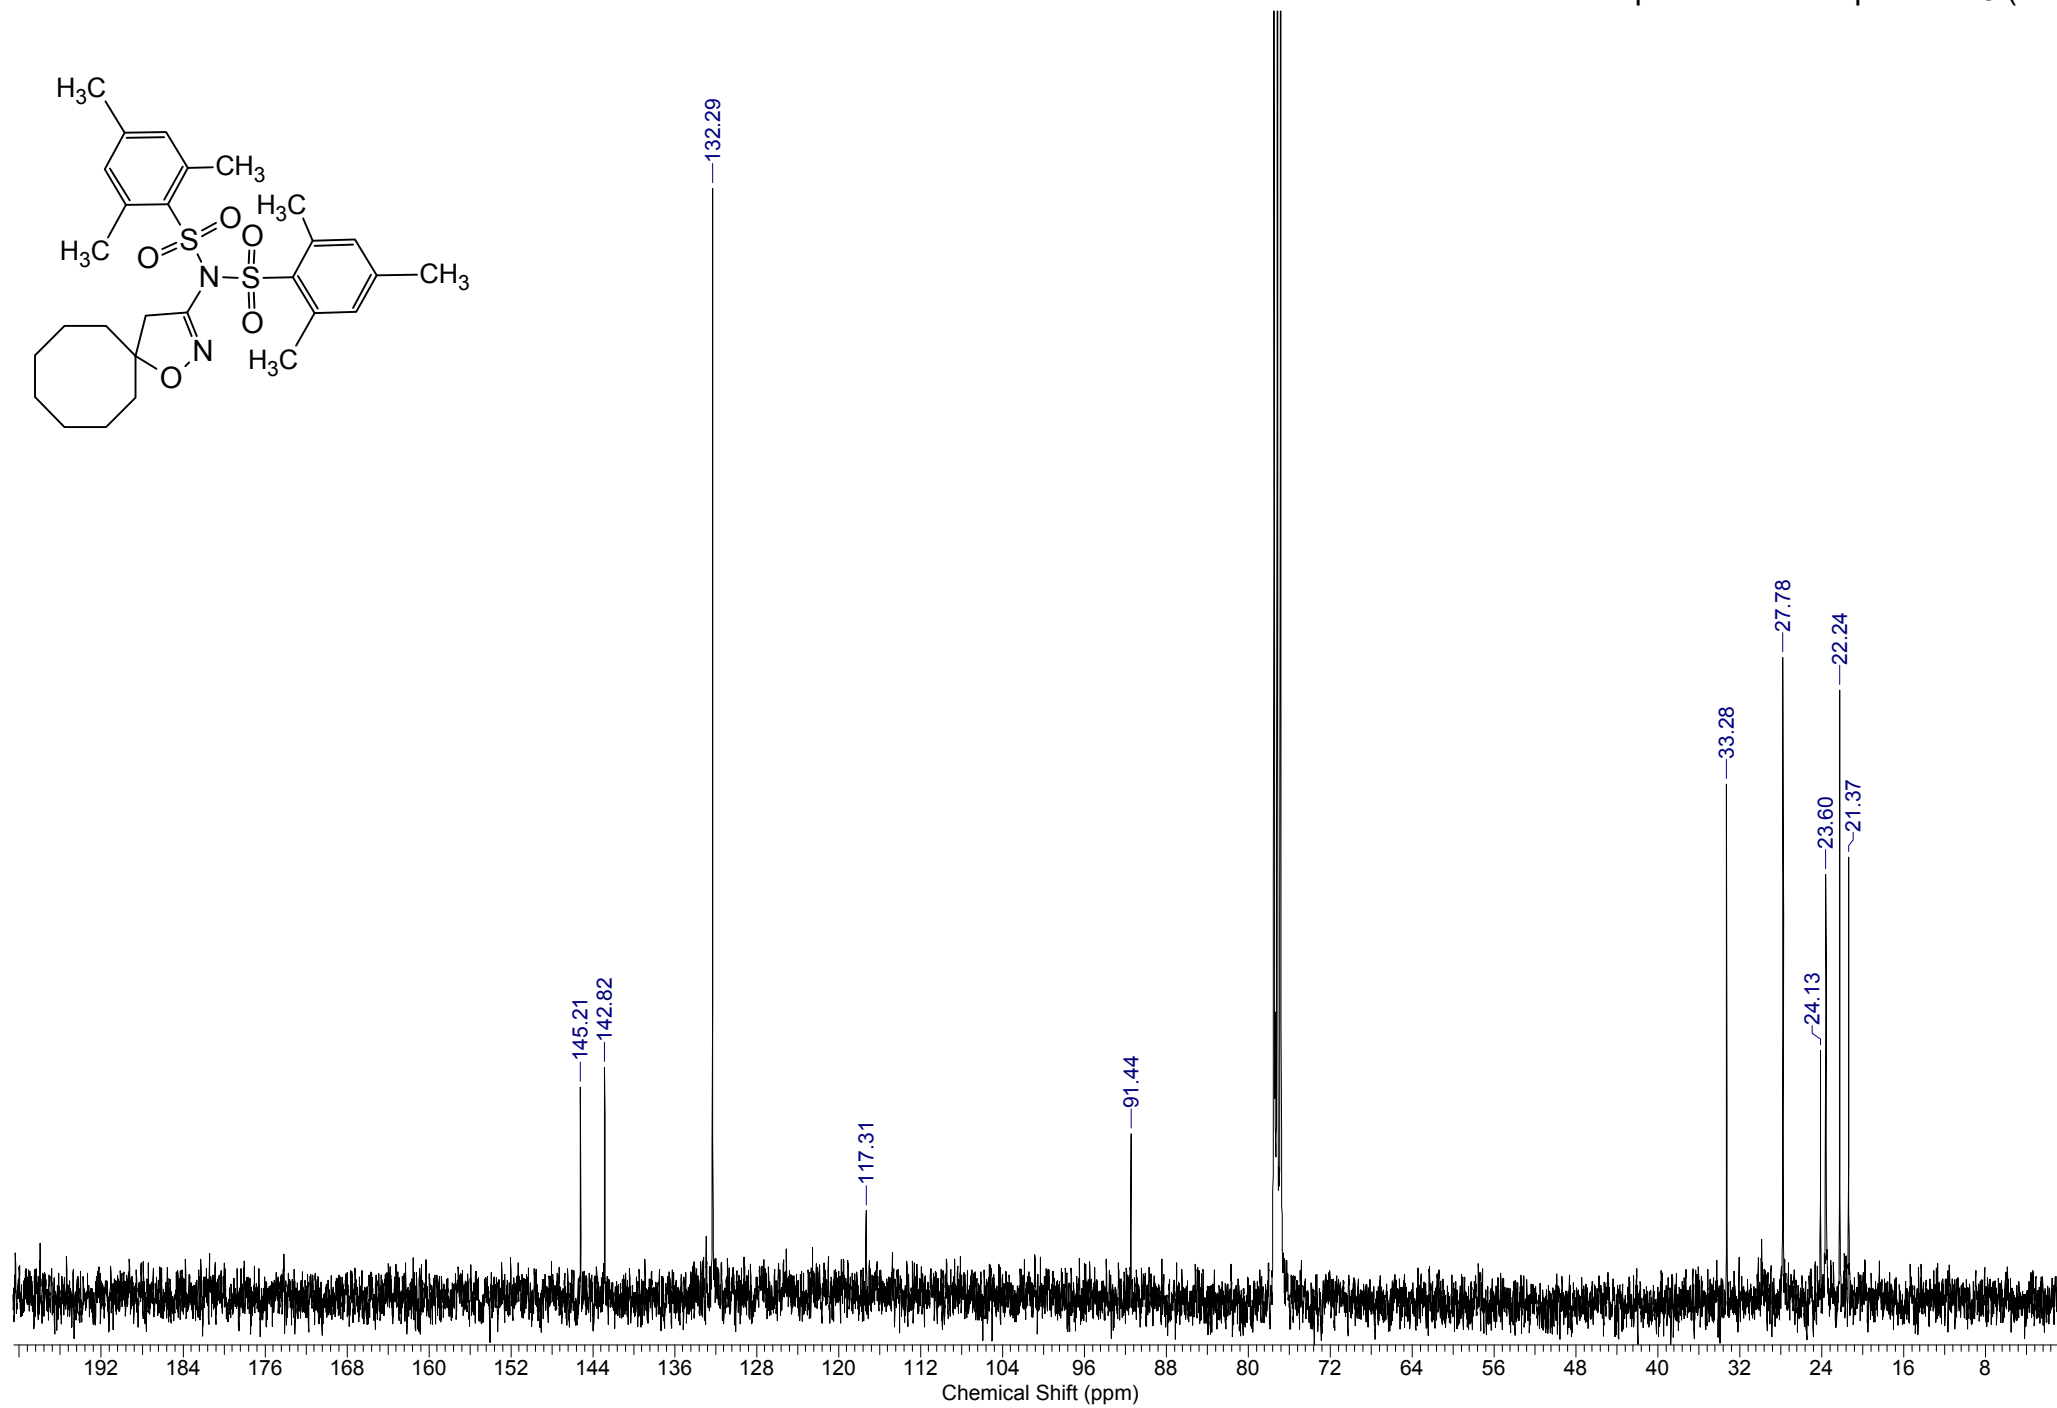

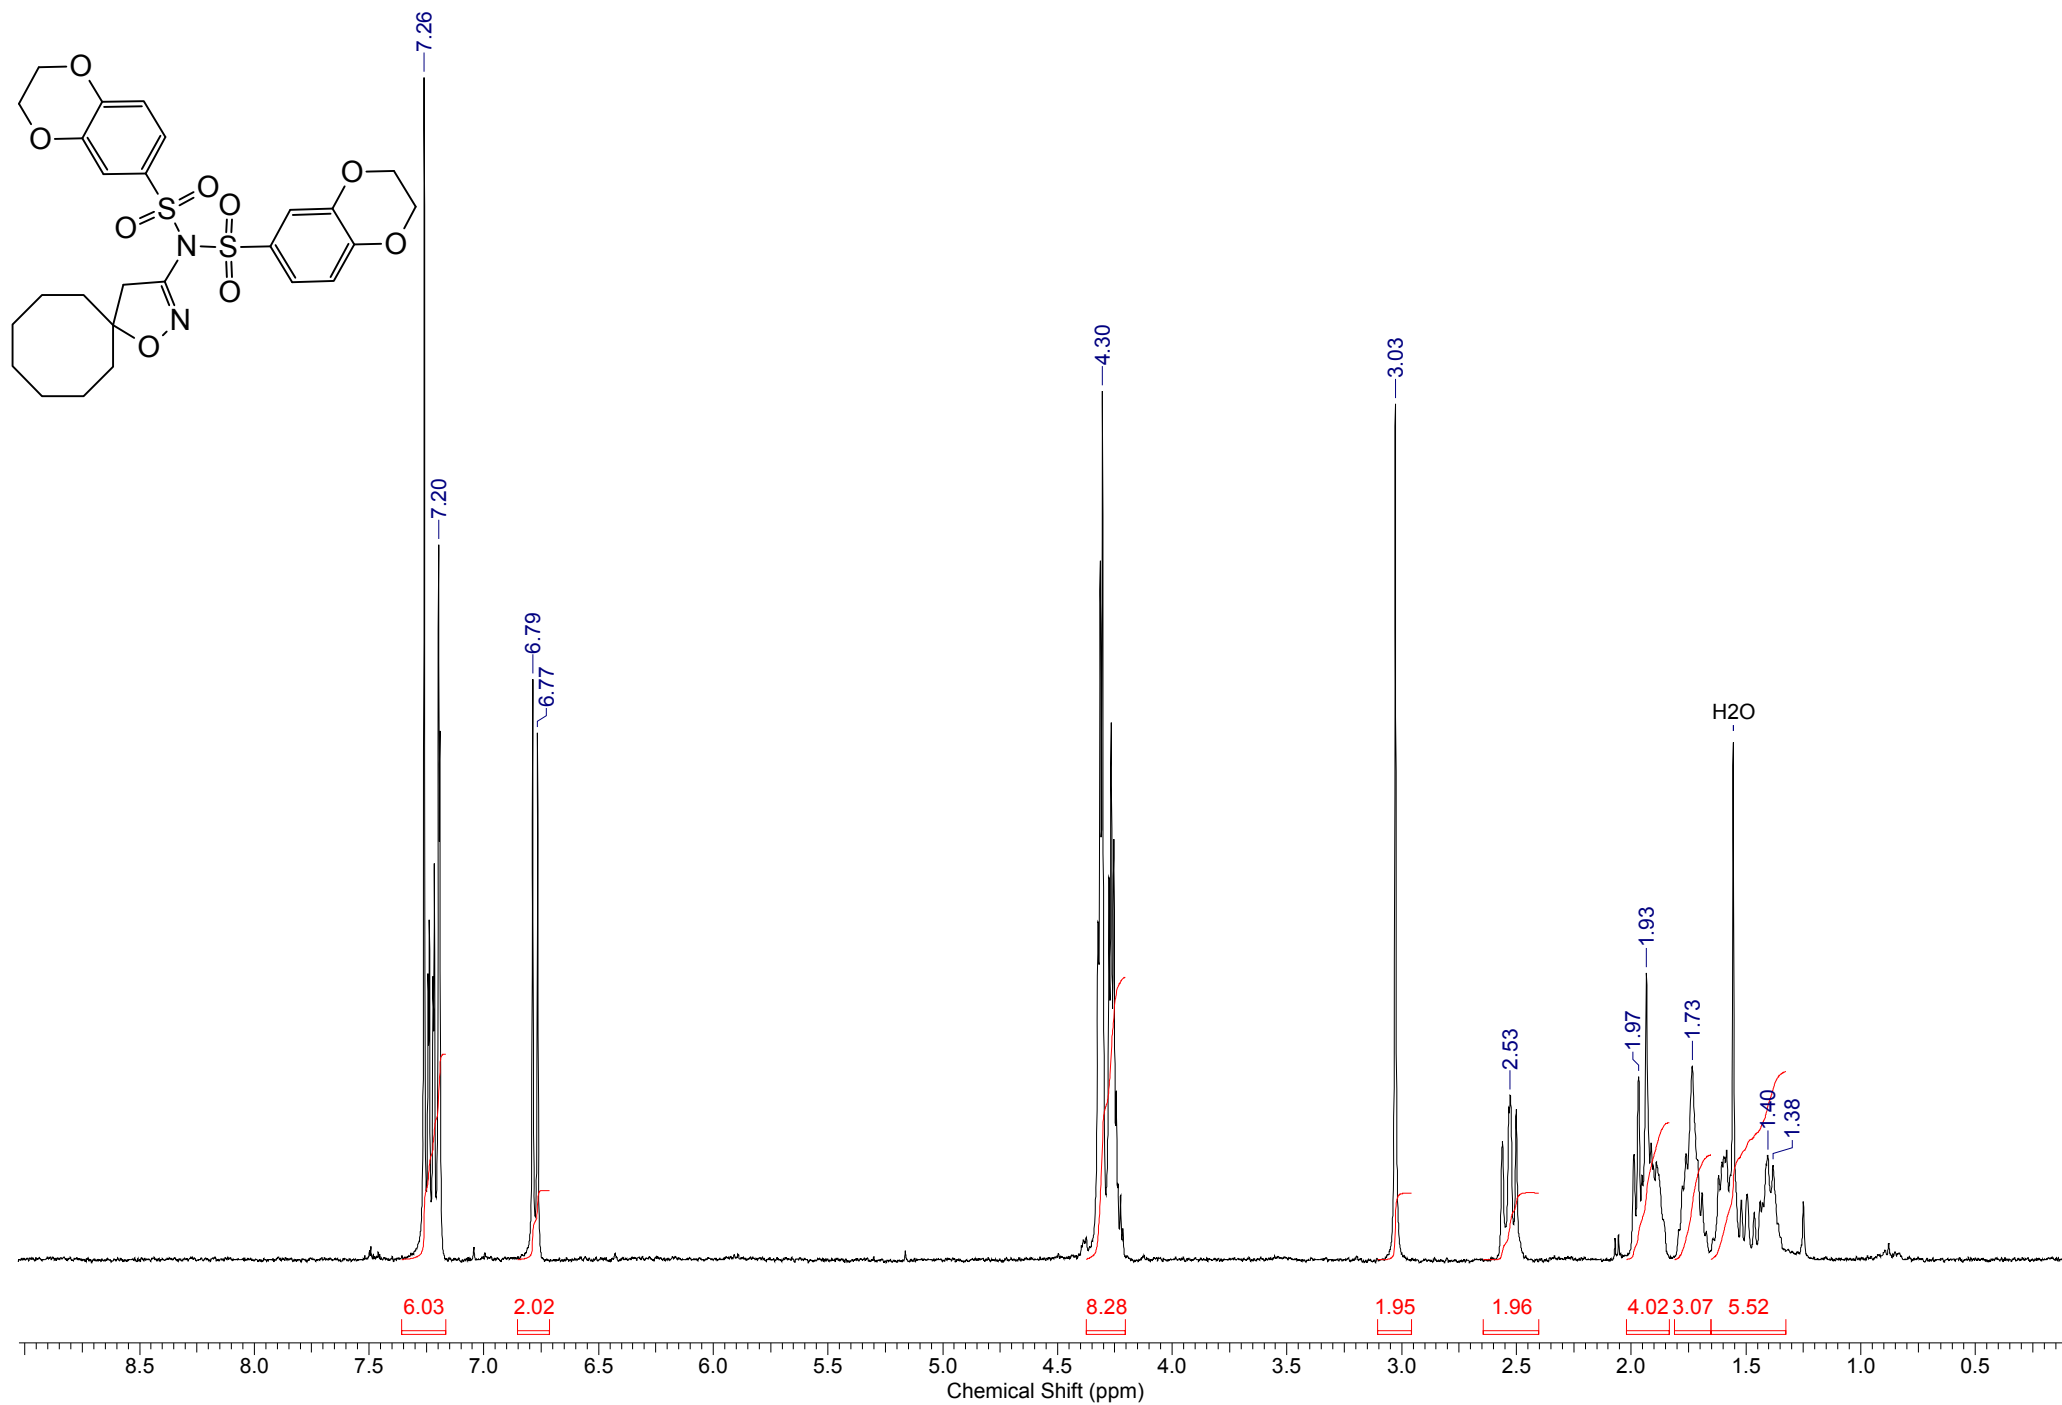

CARBON\_02.esp

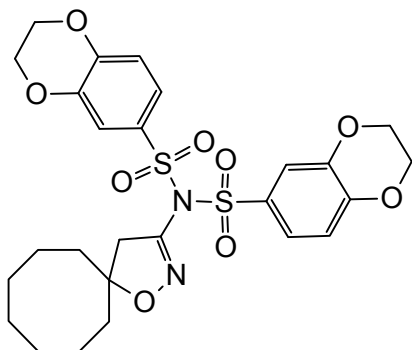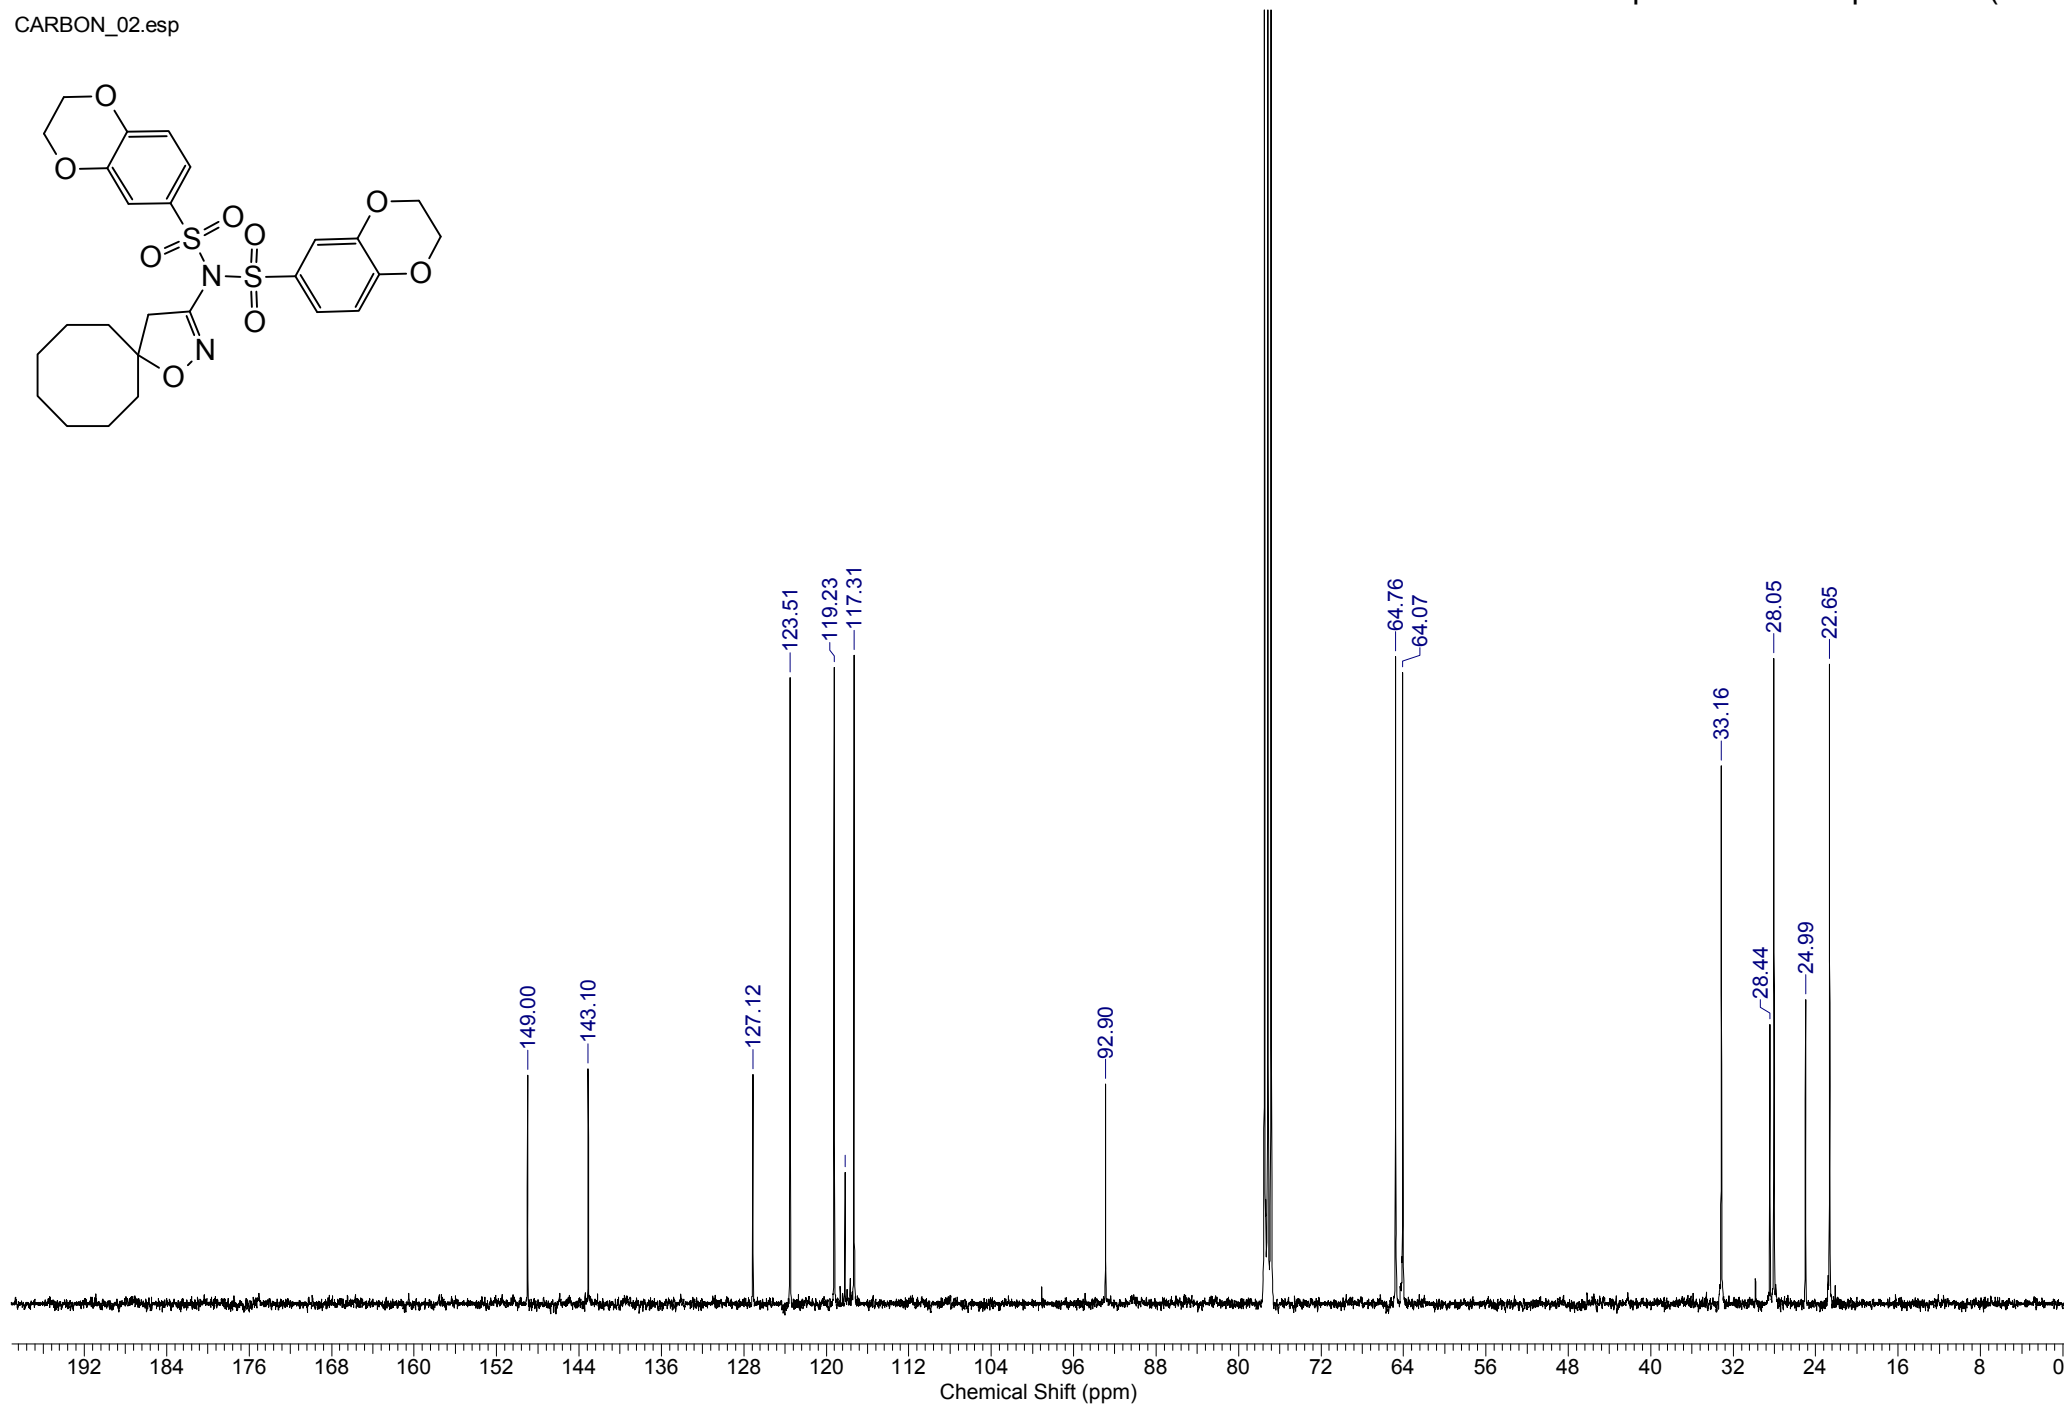

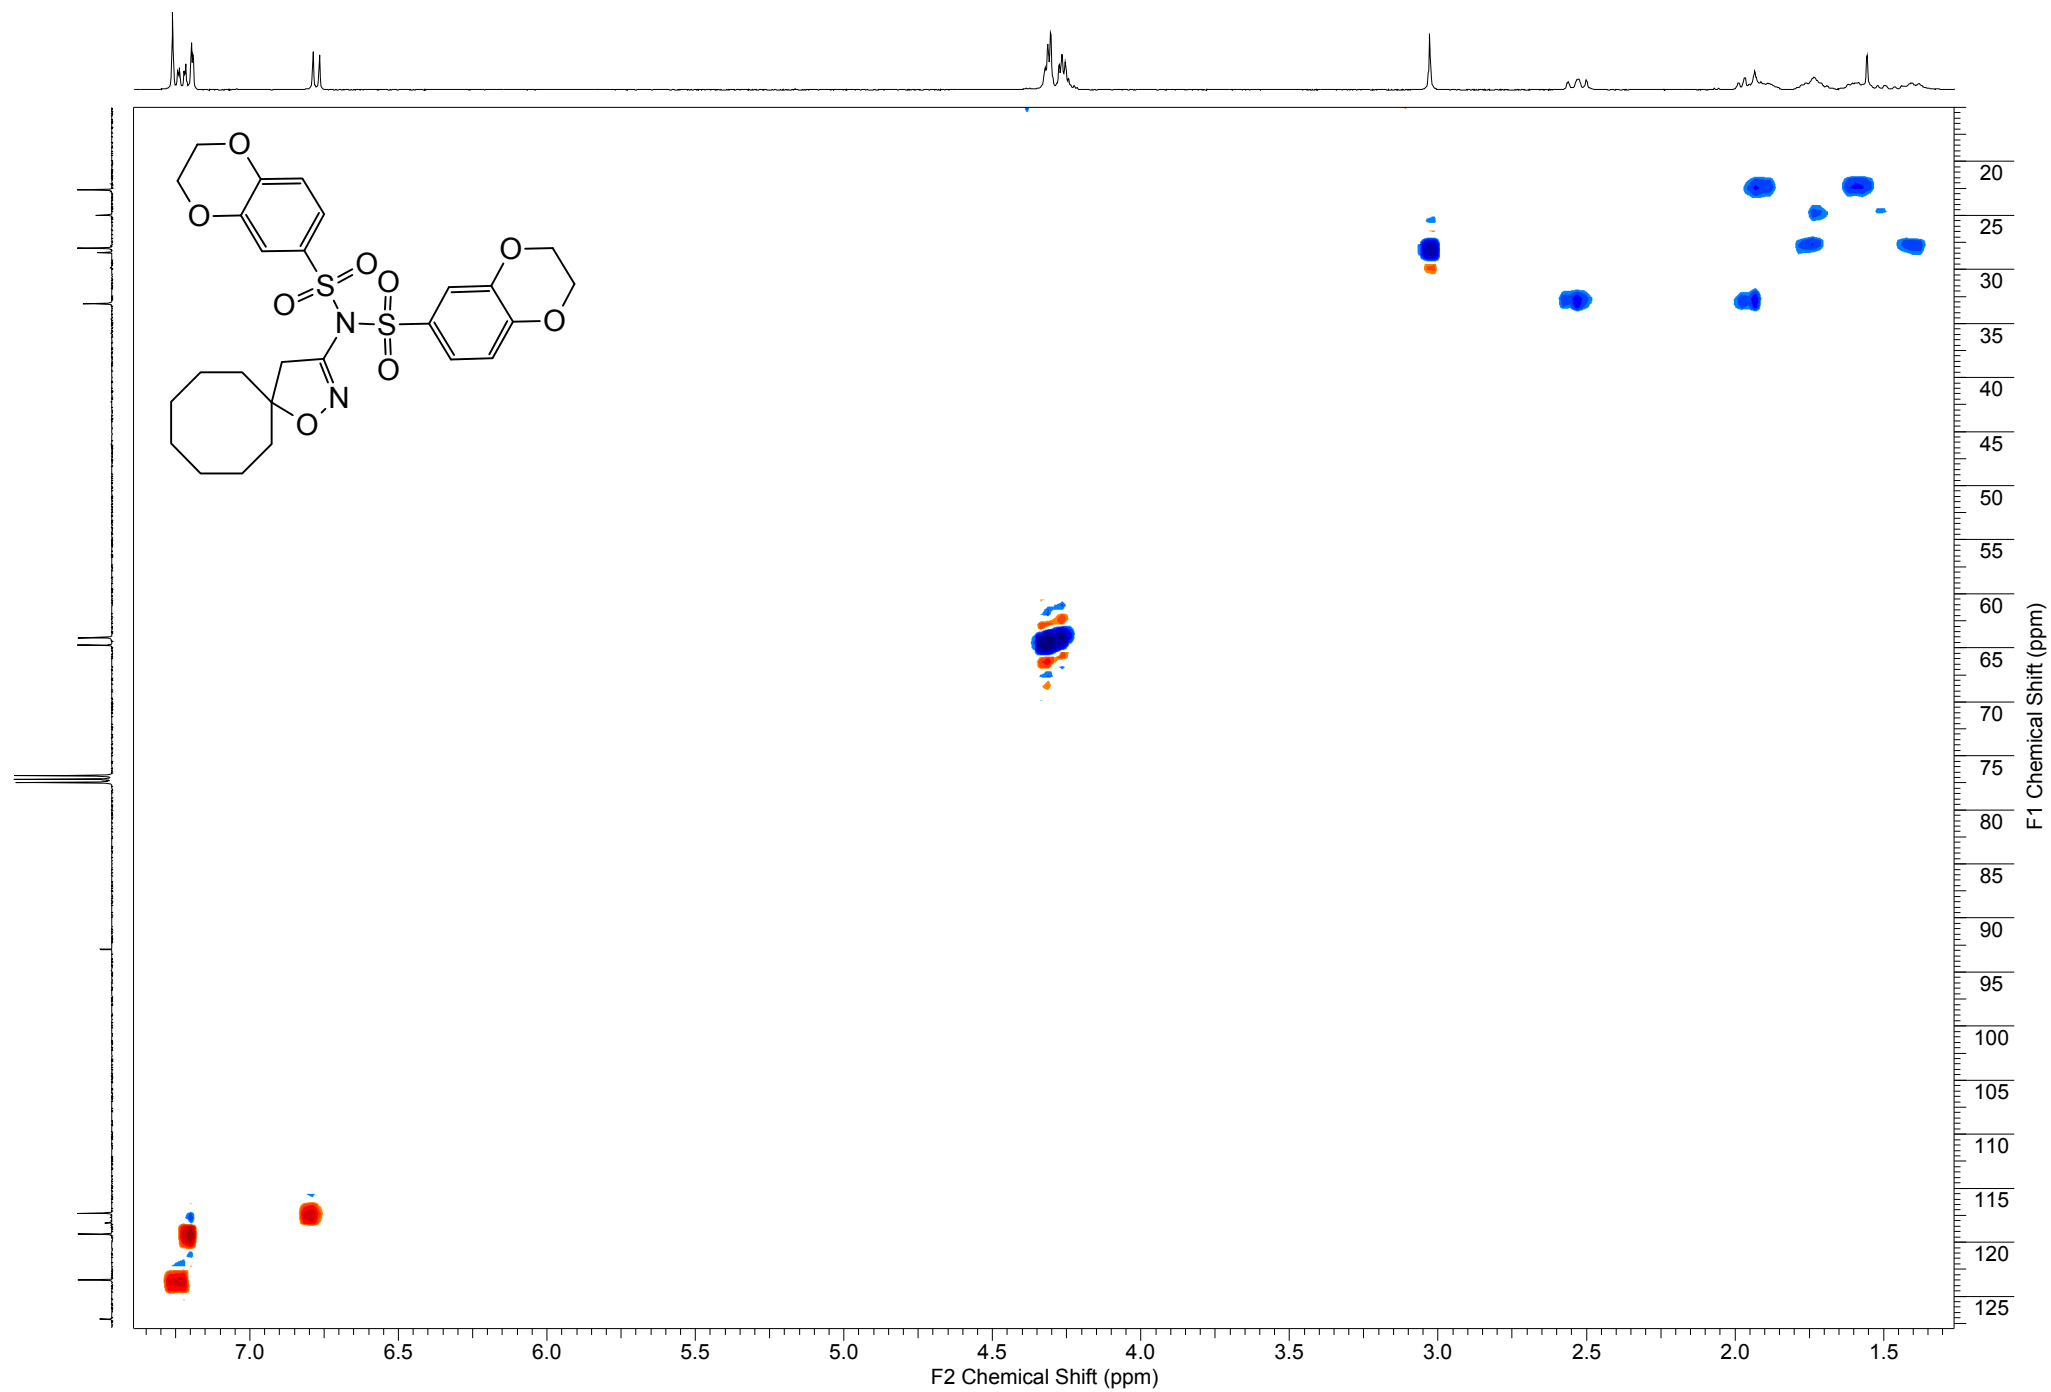

<sup>1</sup>H NMR spectrum of compound **4g** (CDCl<sub>3</sub>)

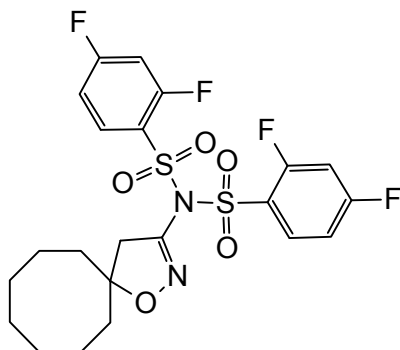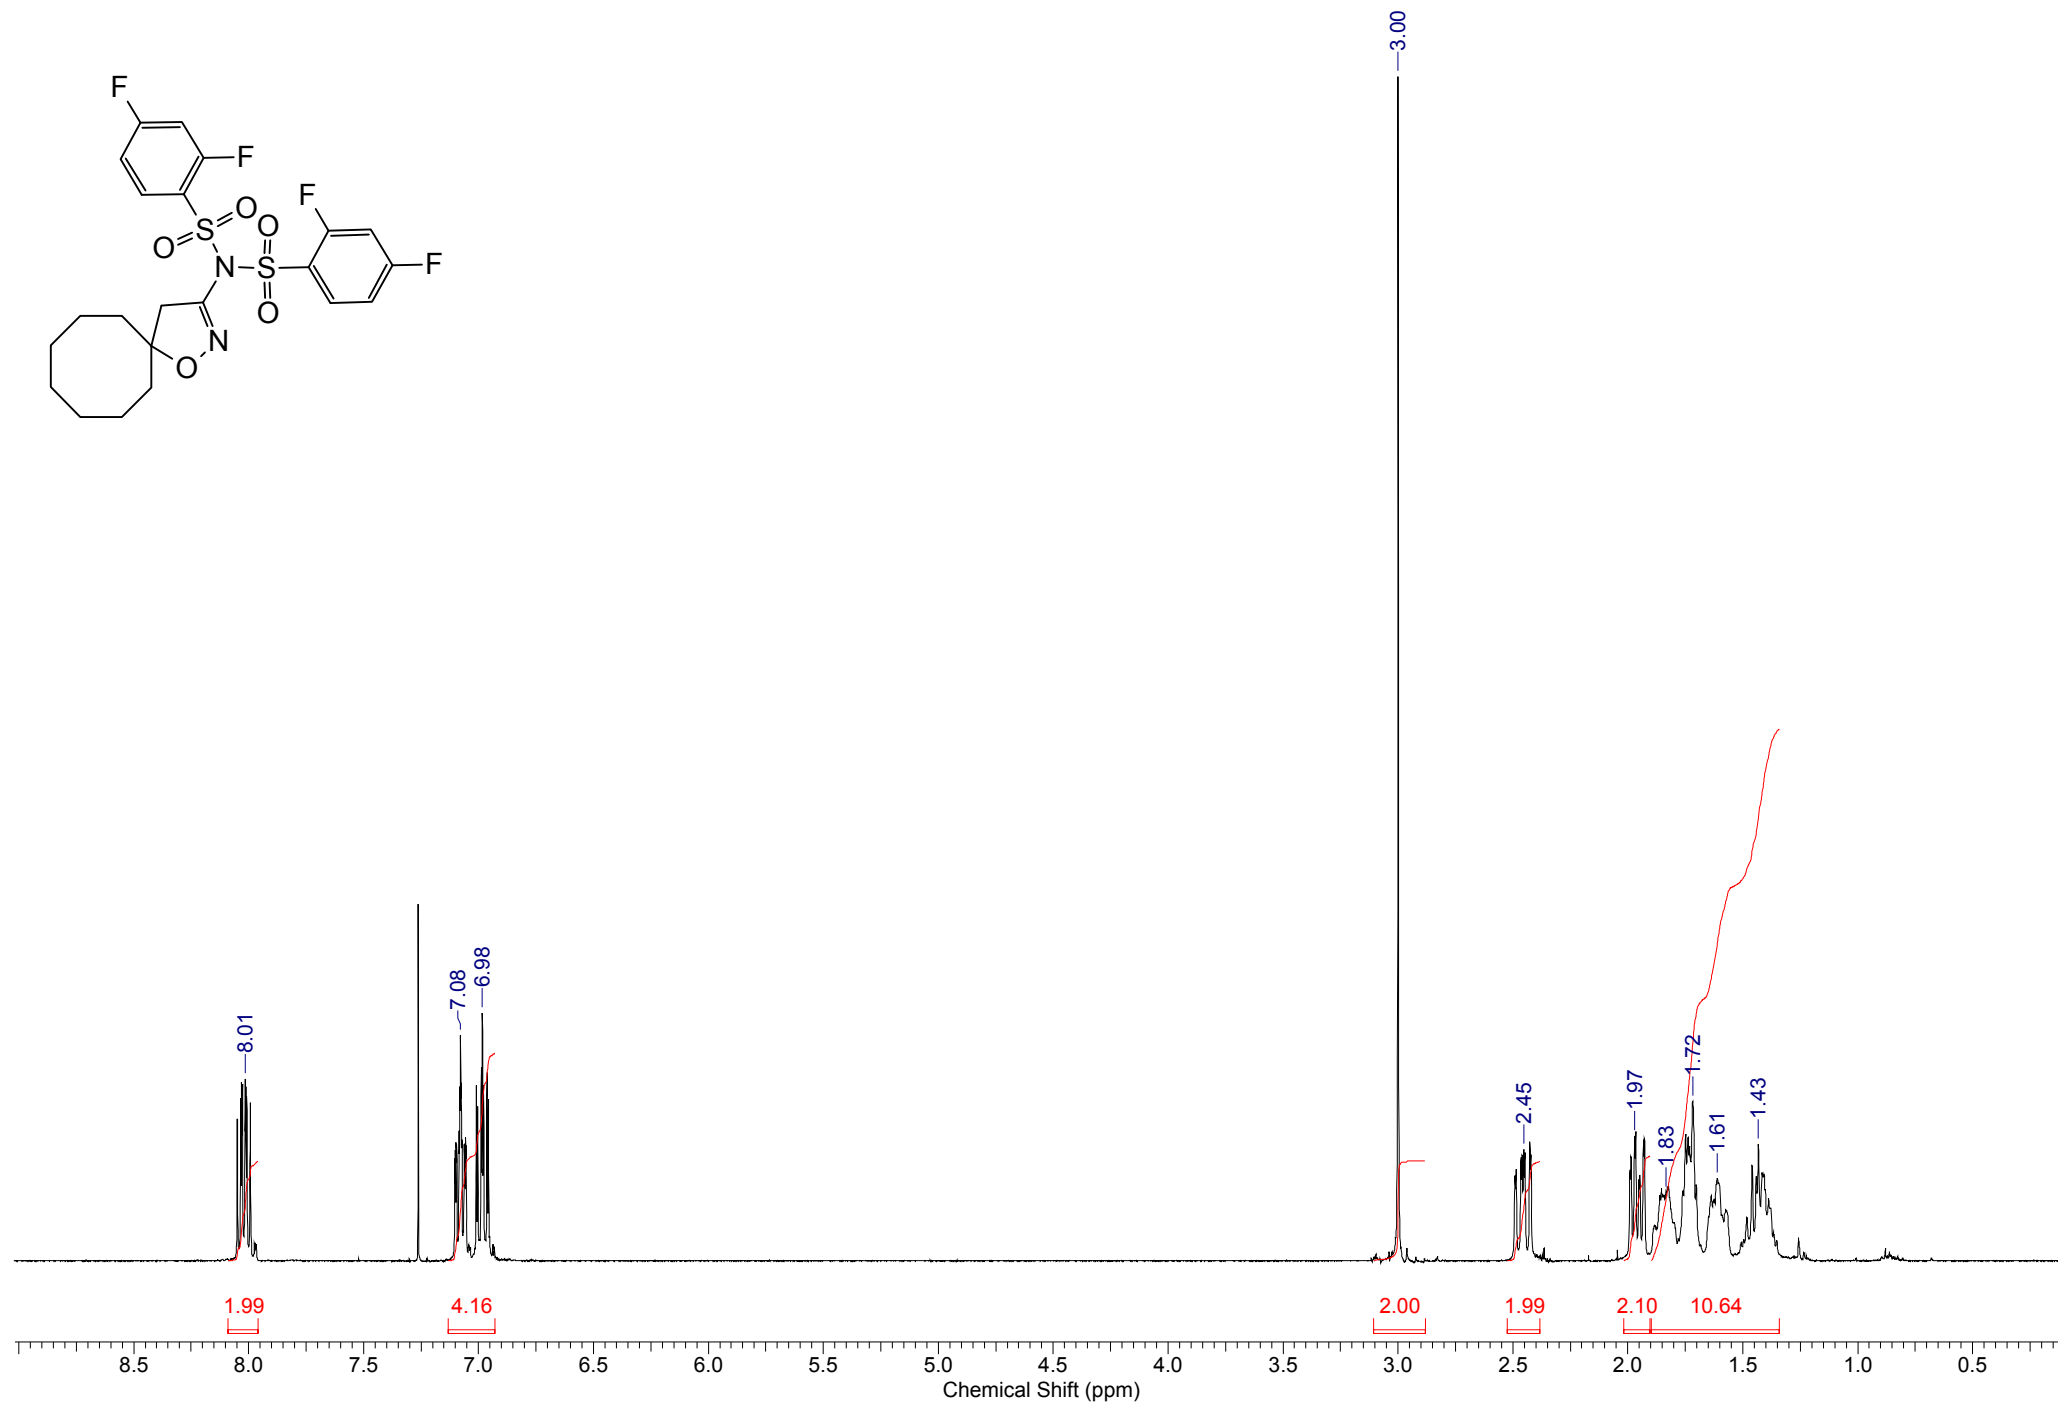



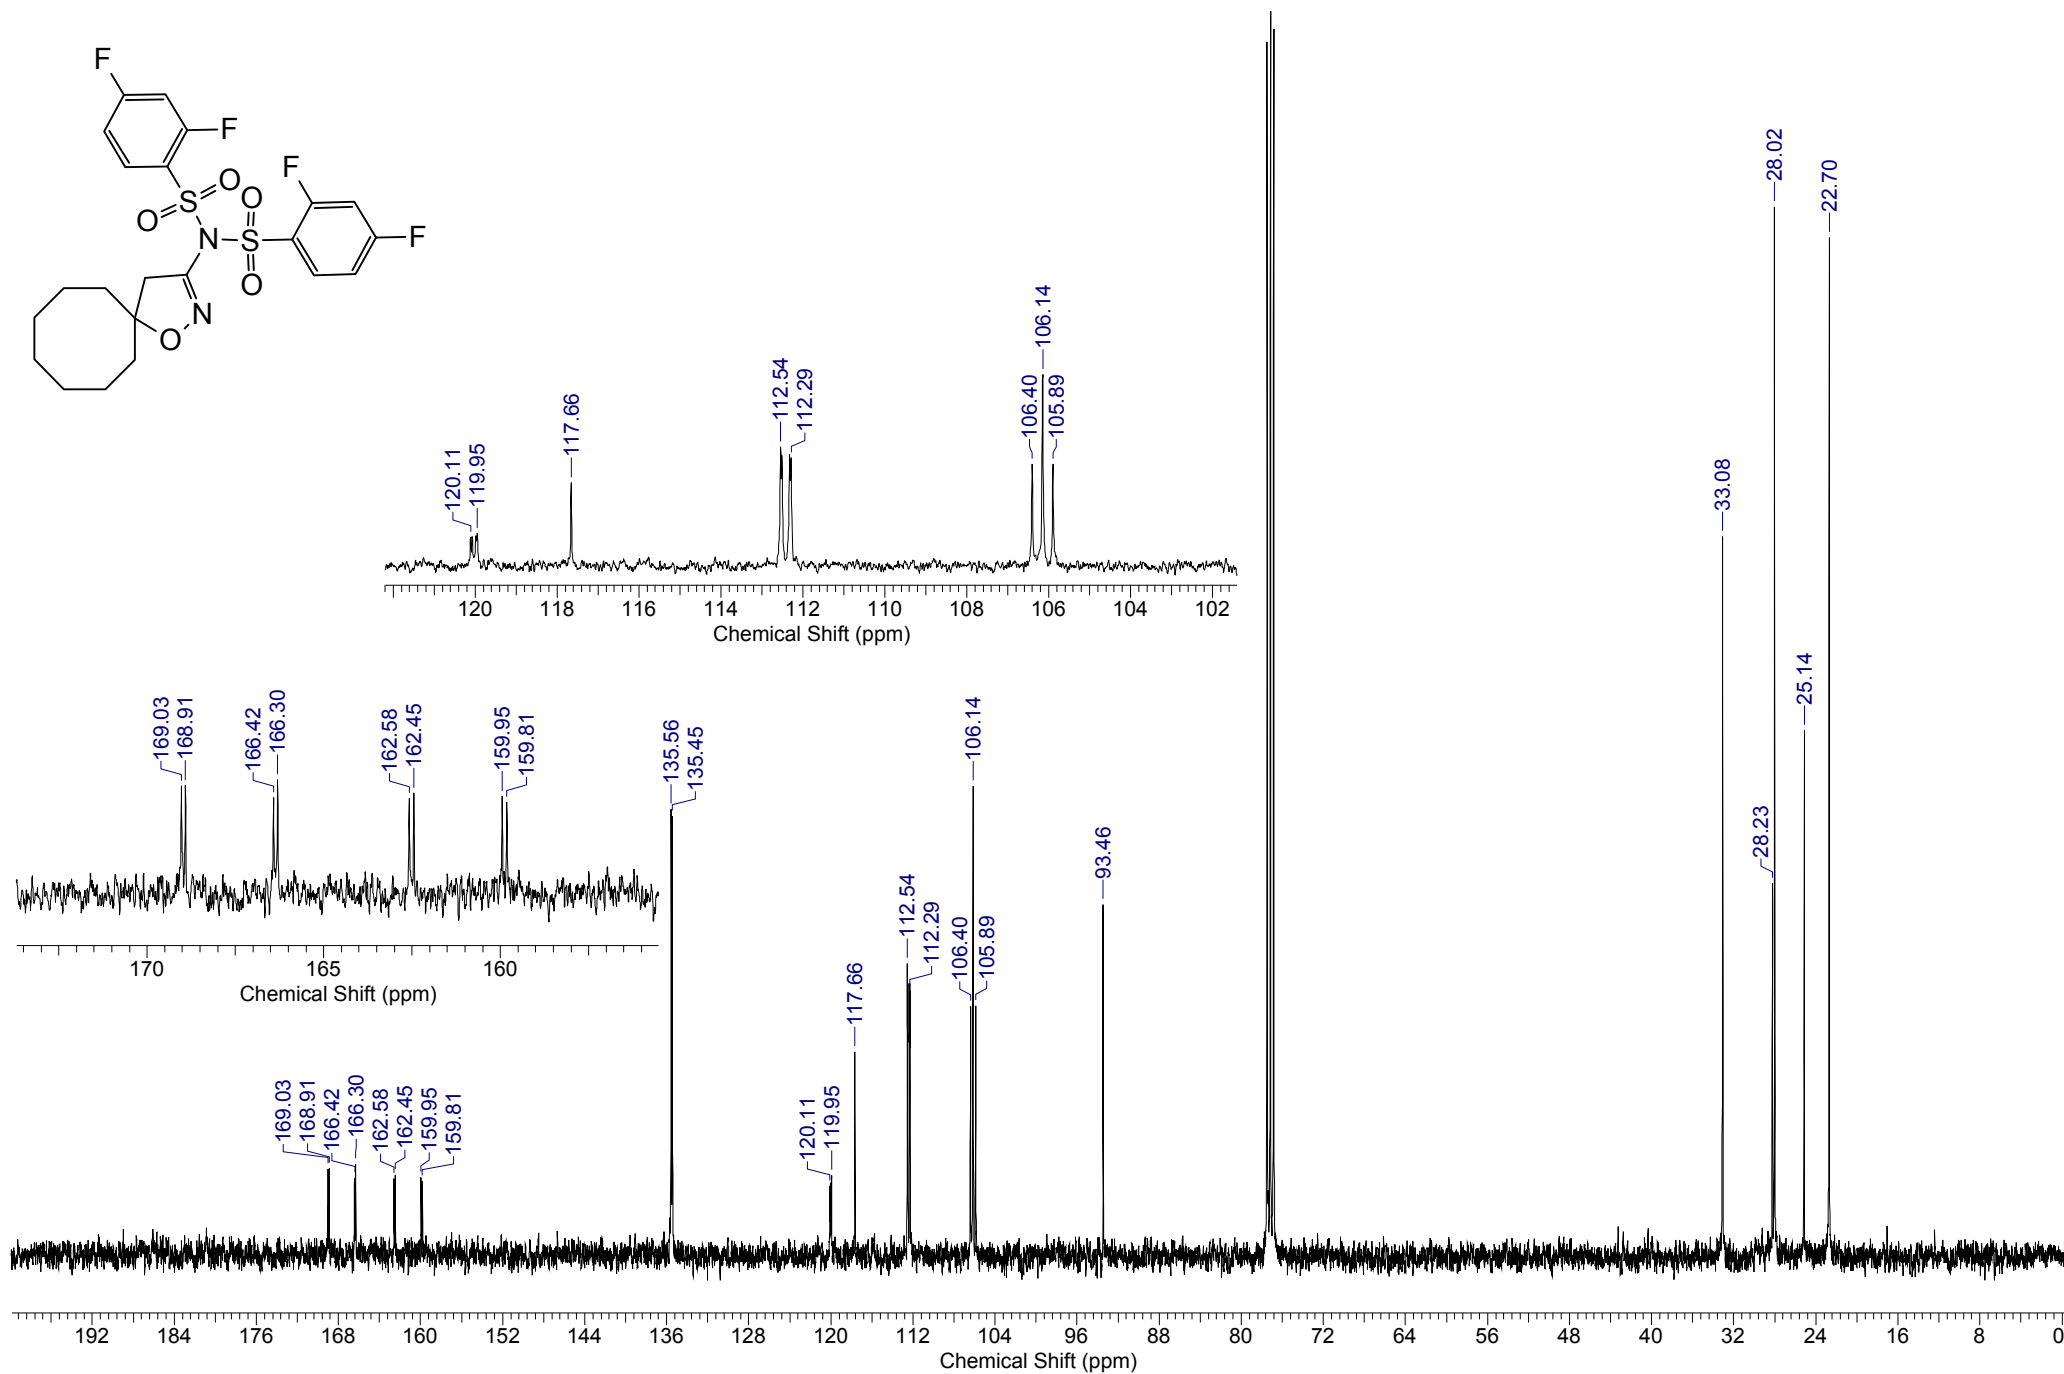

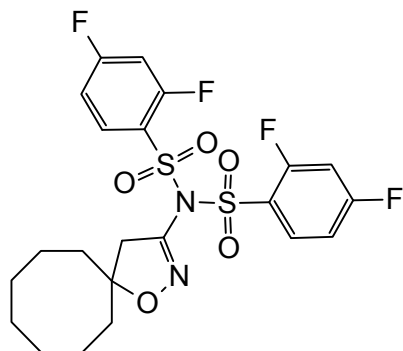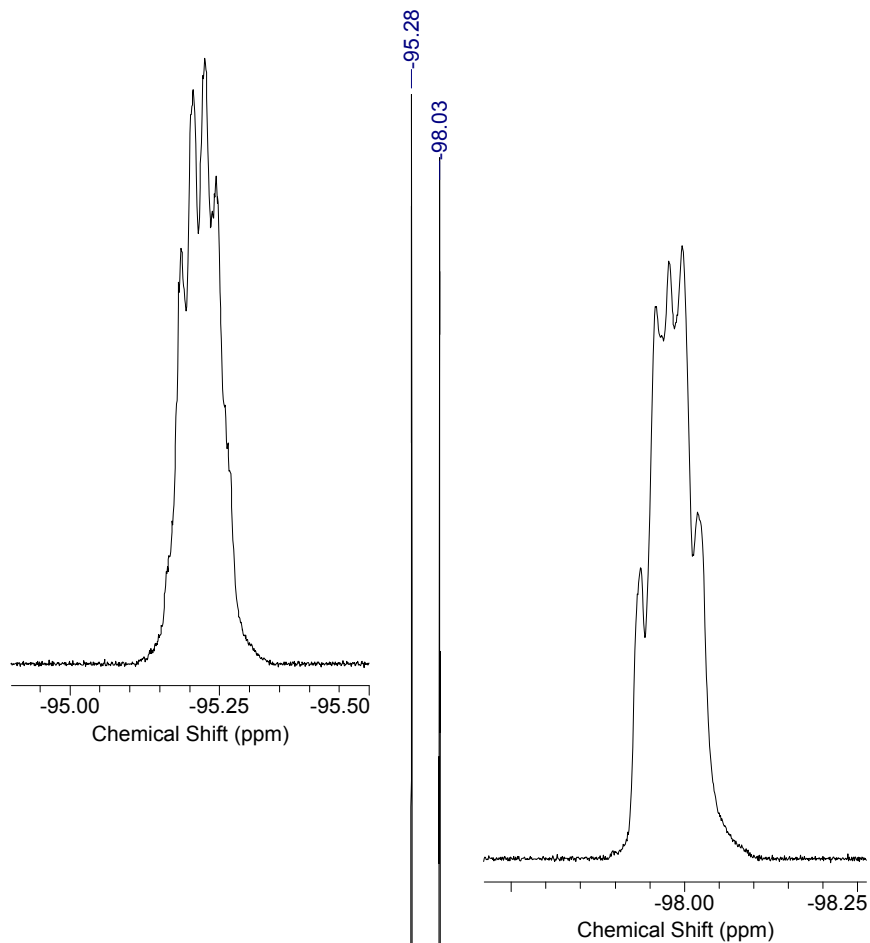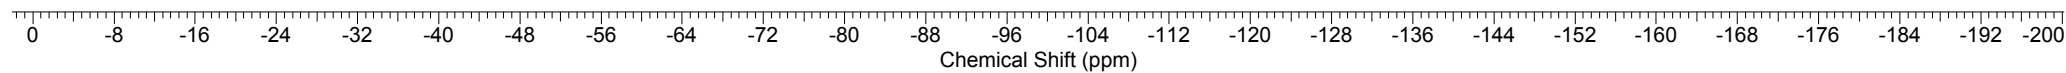

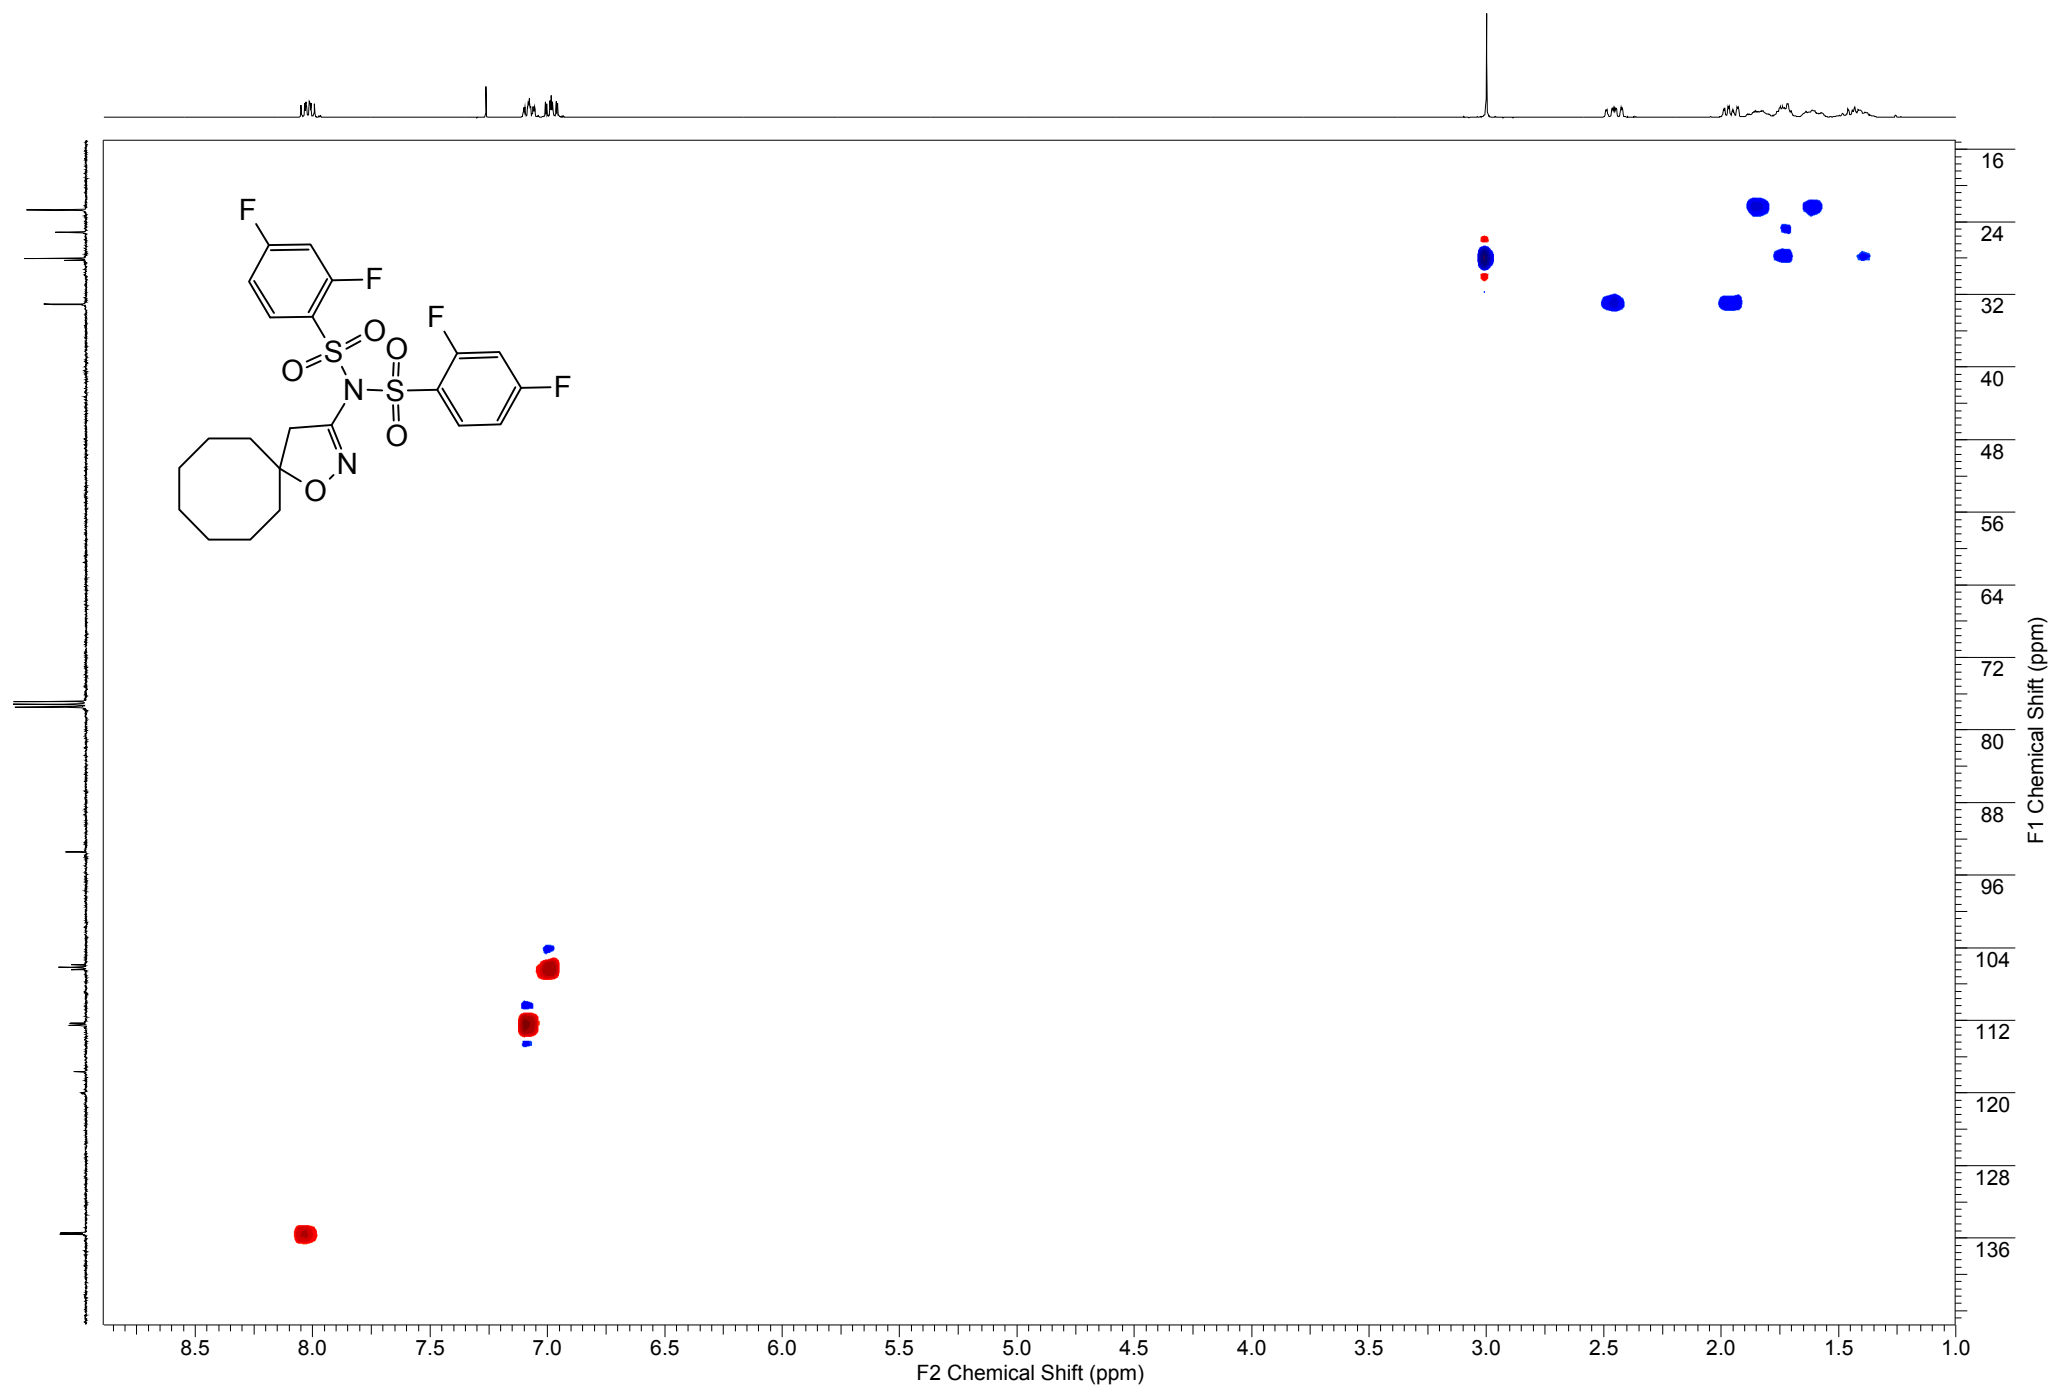

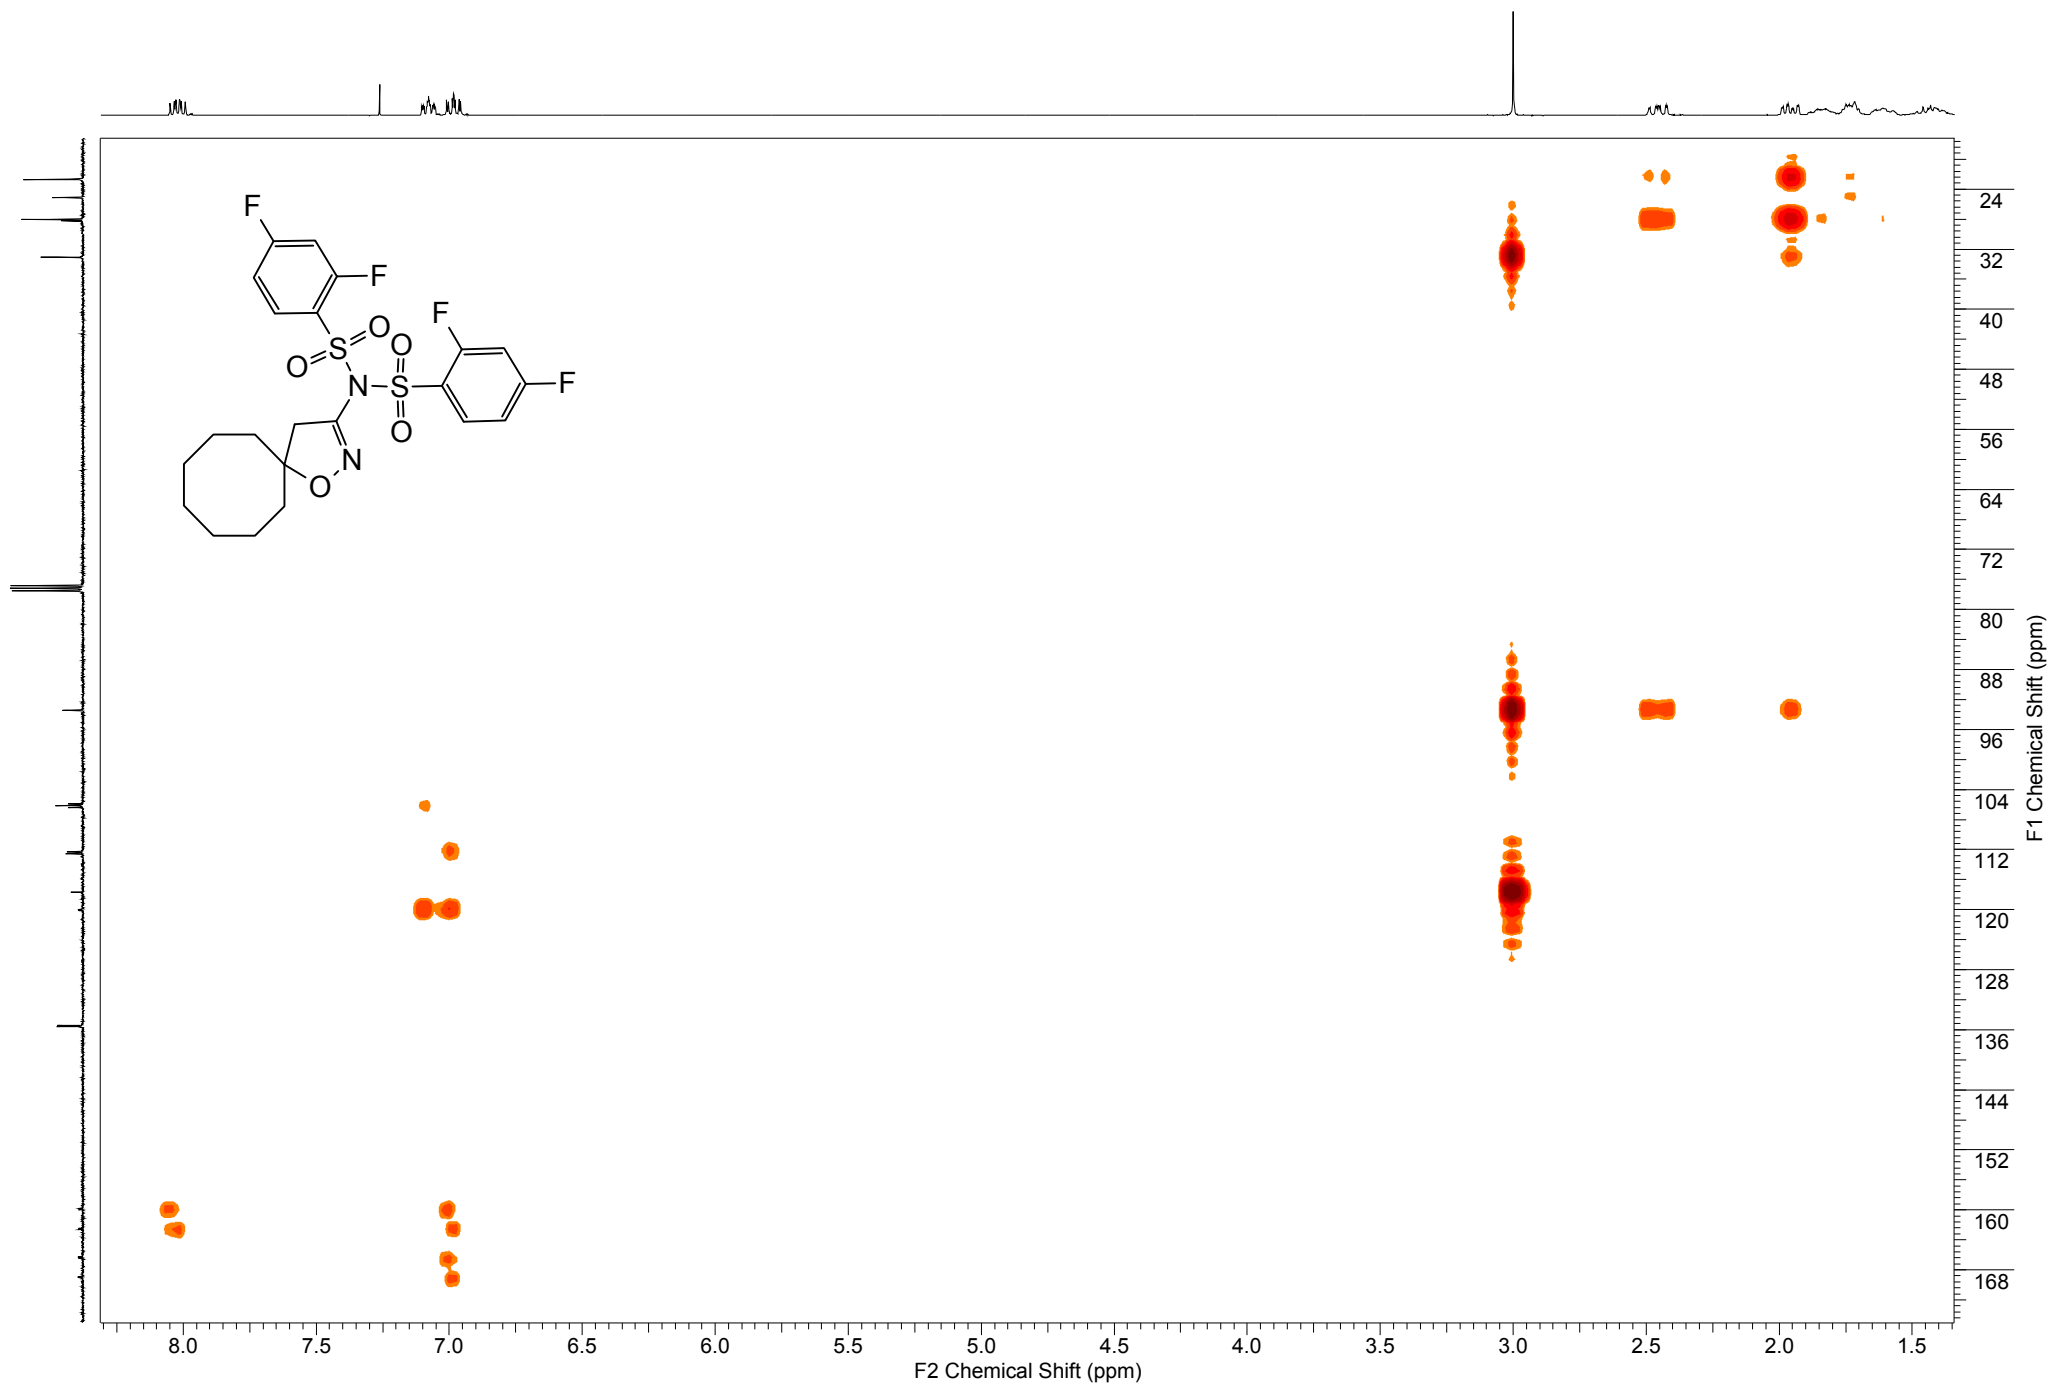

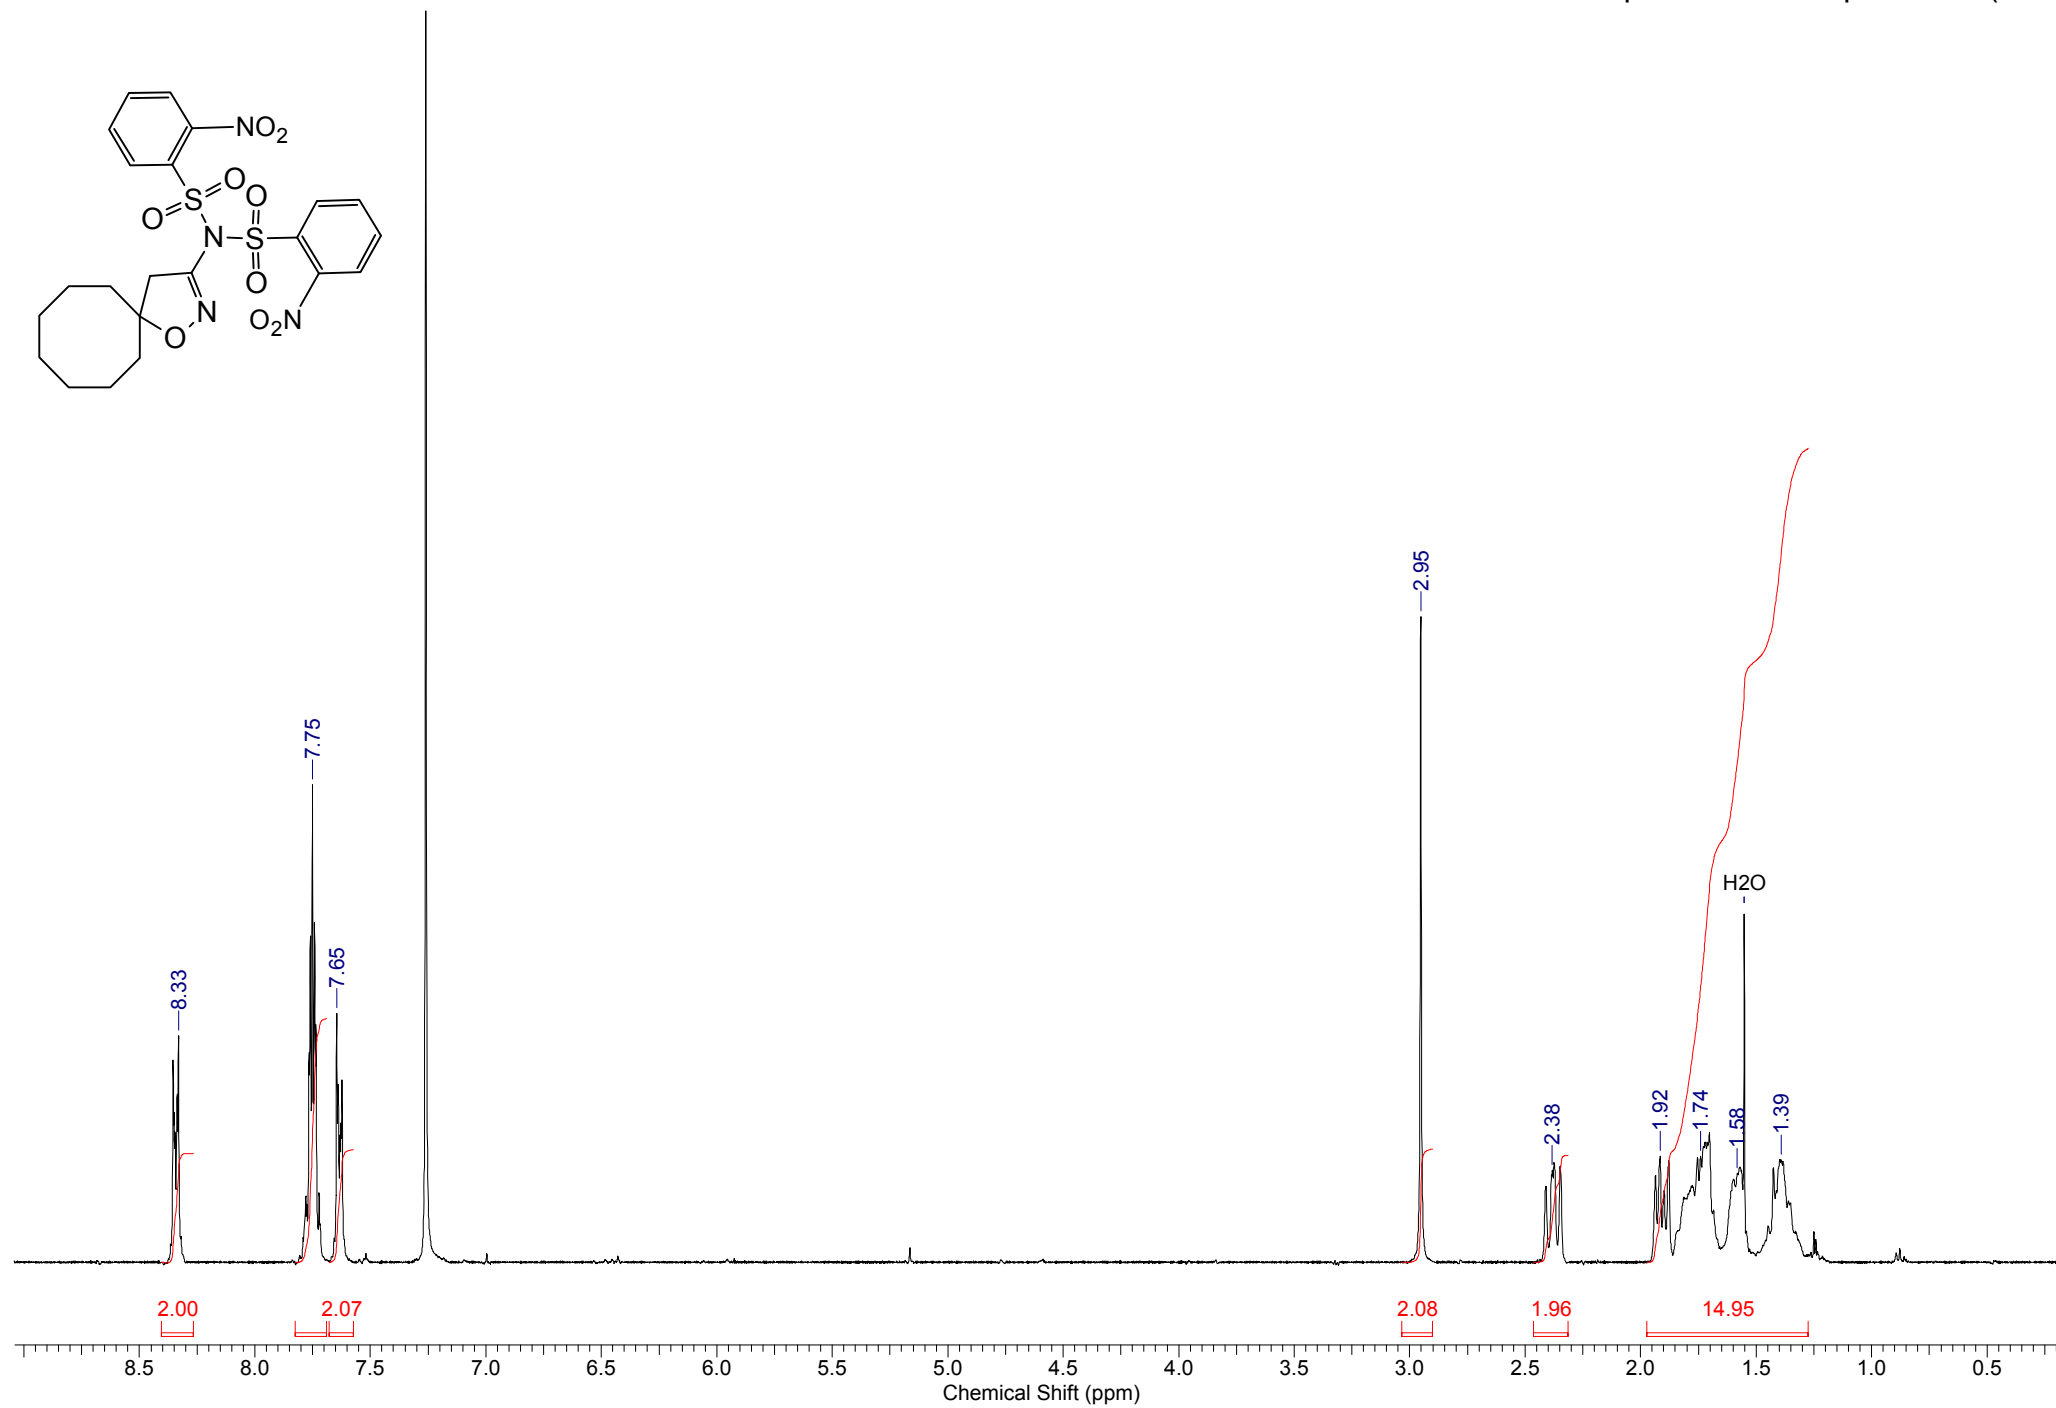

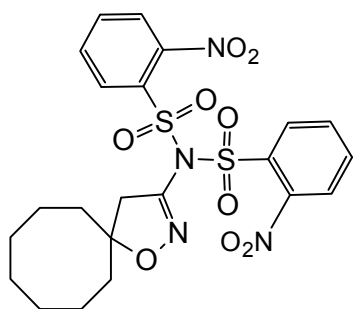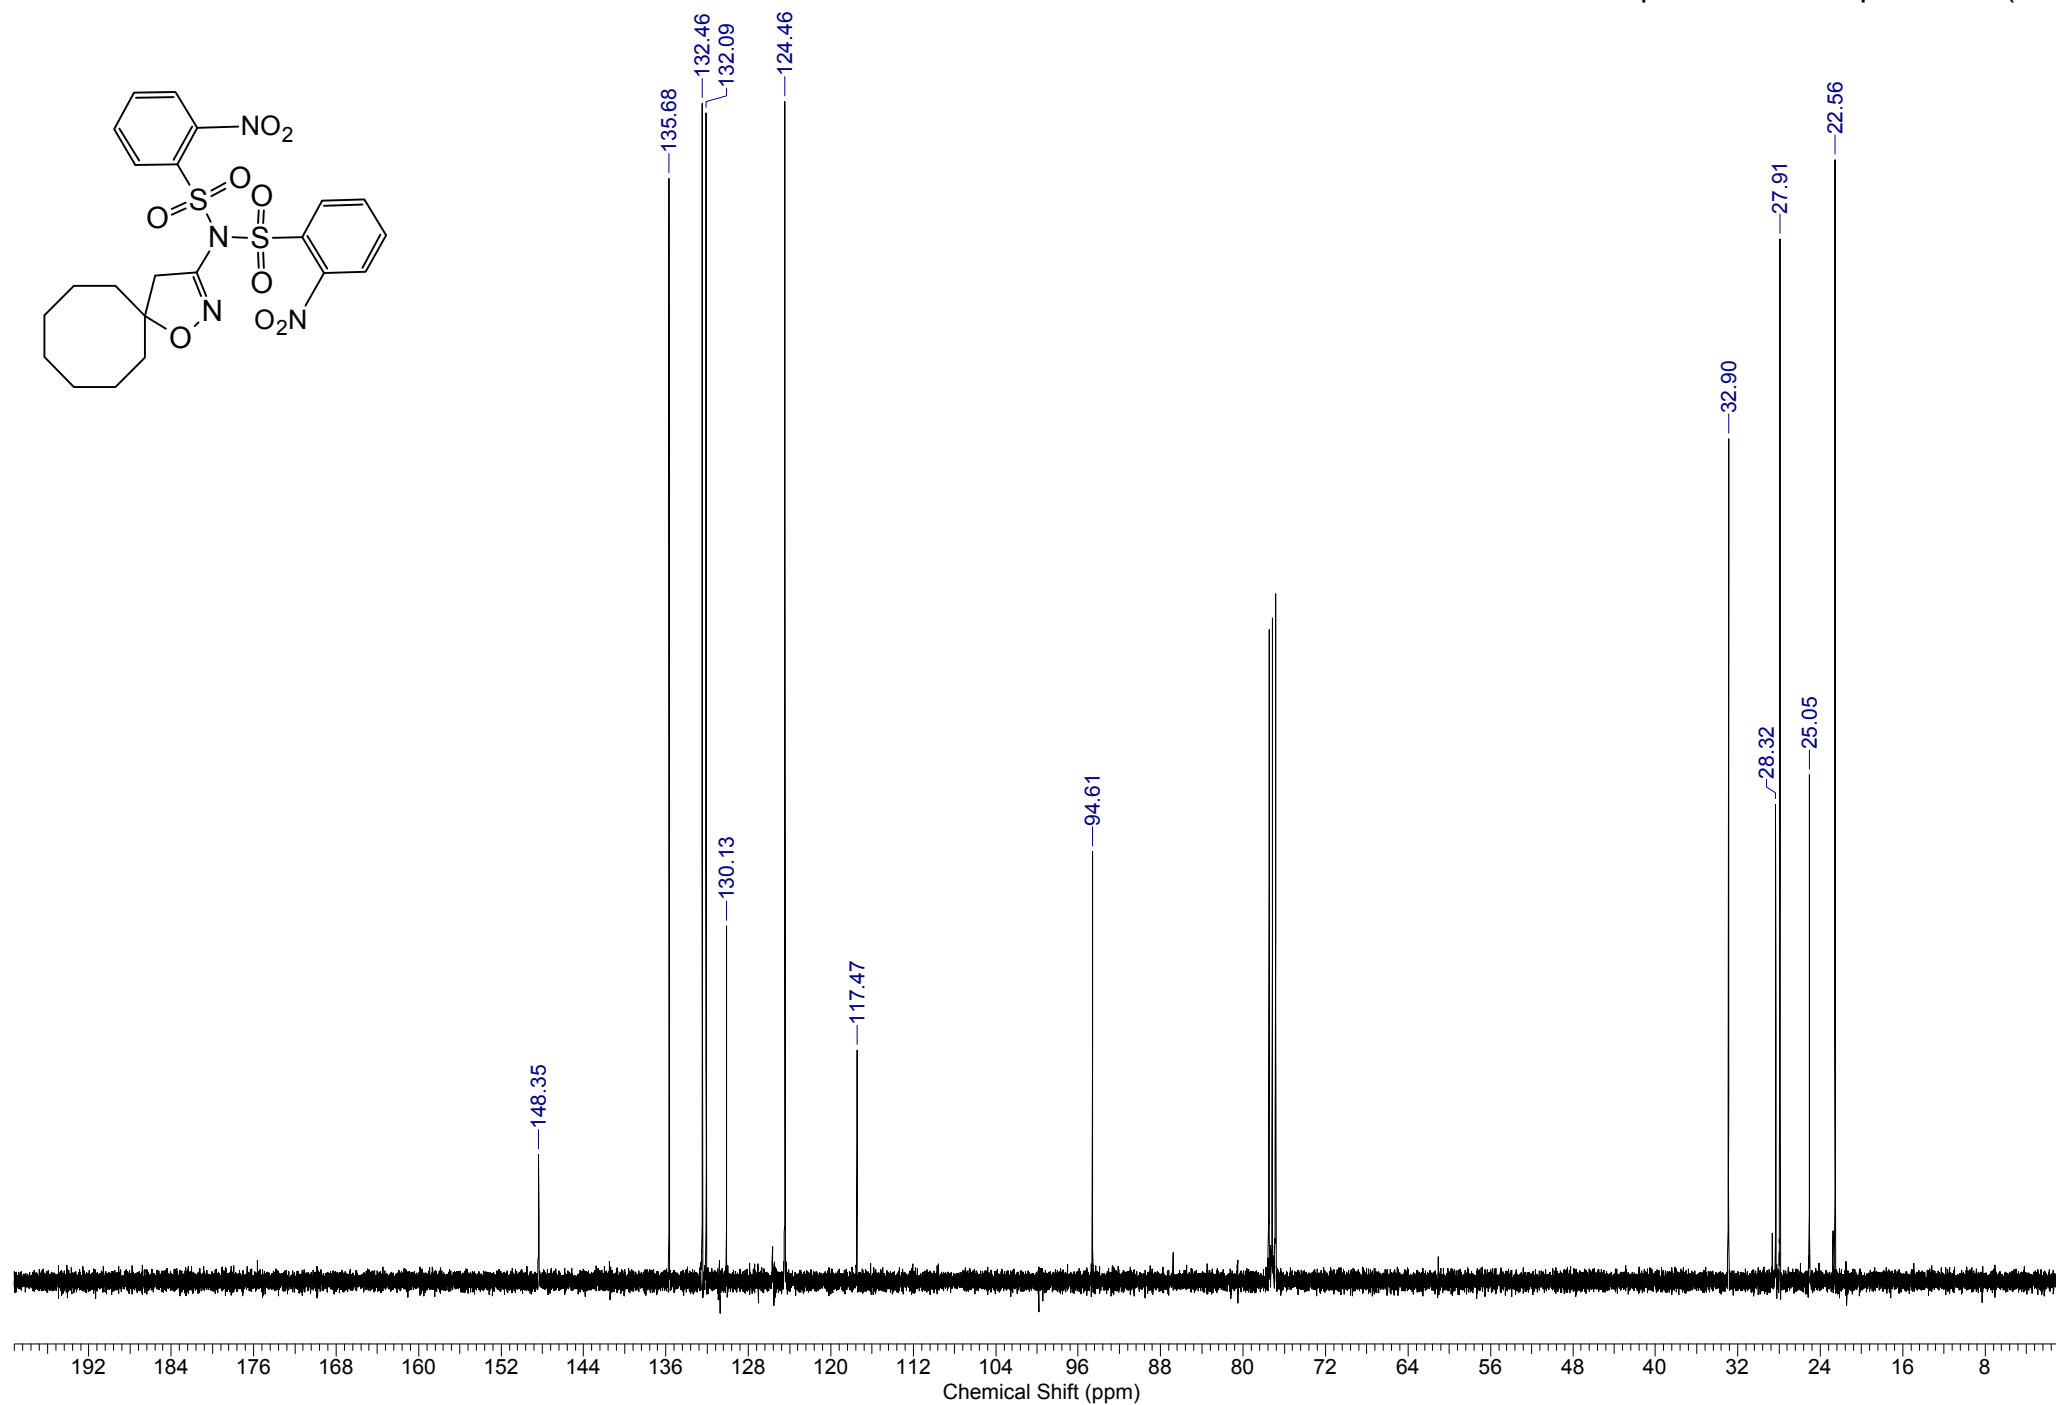

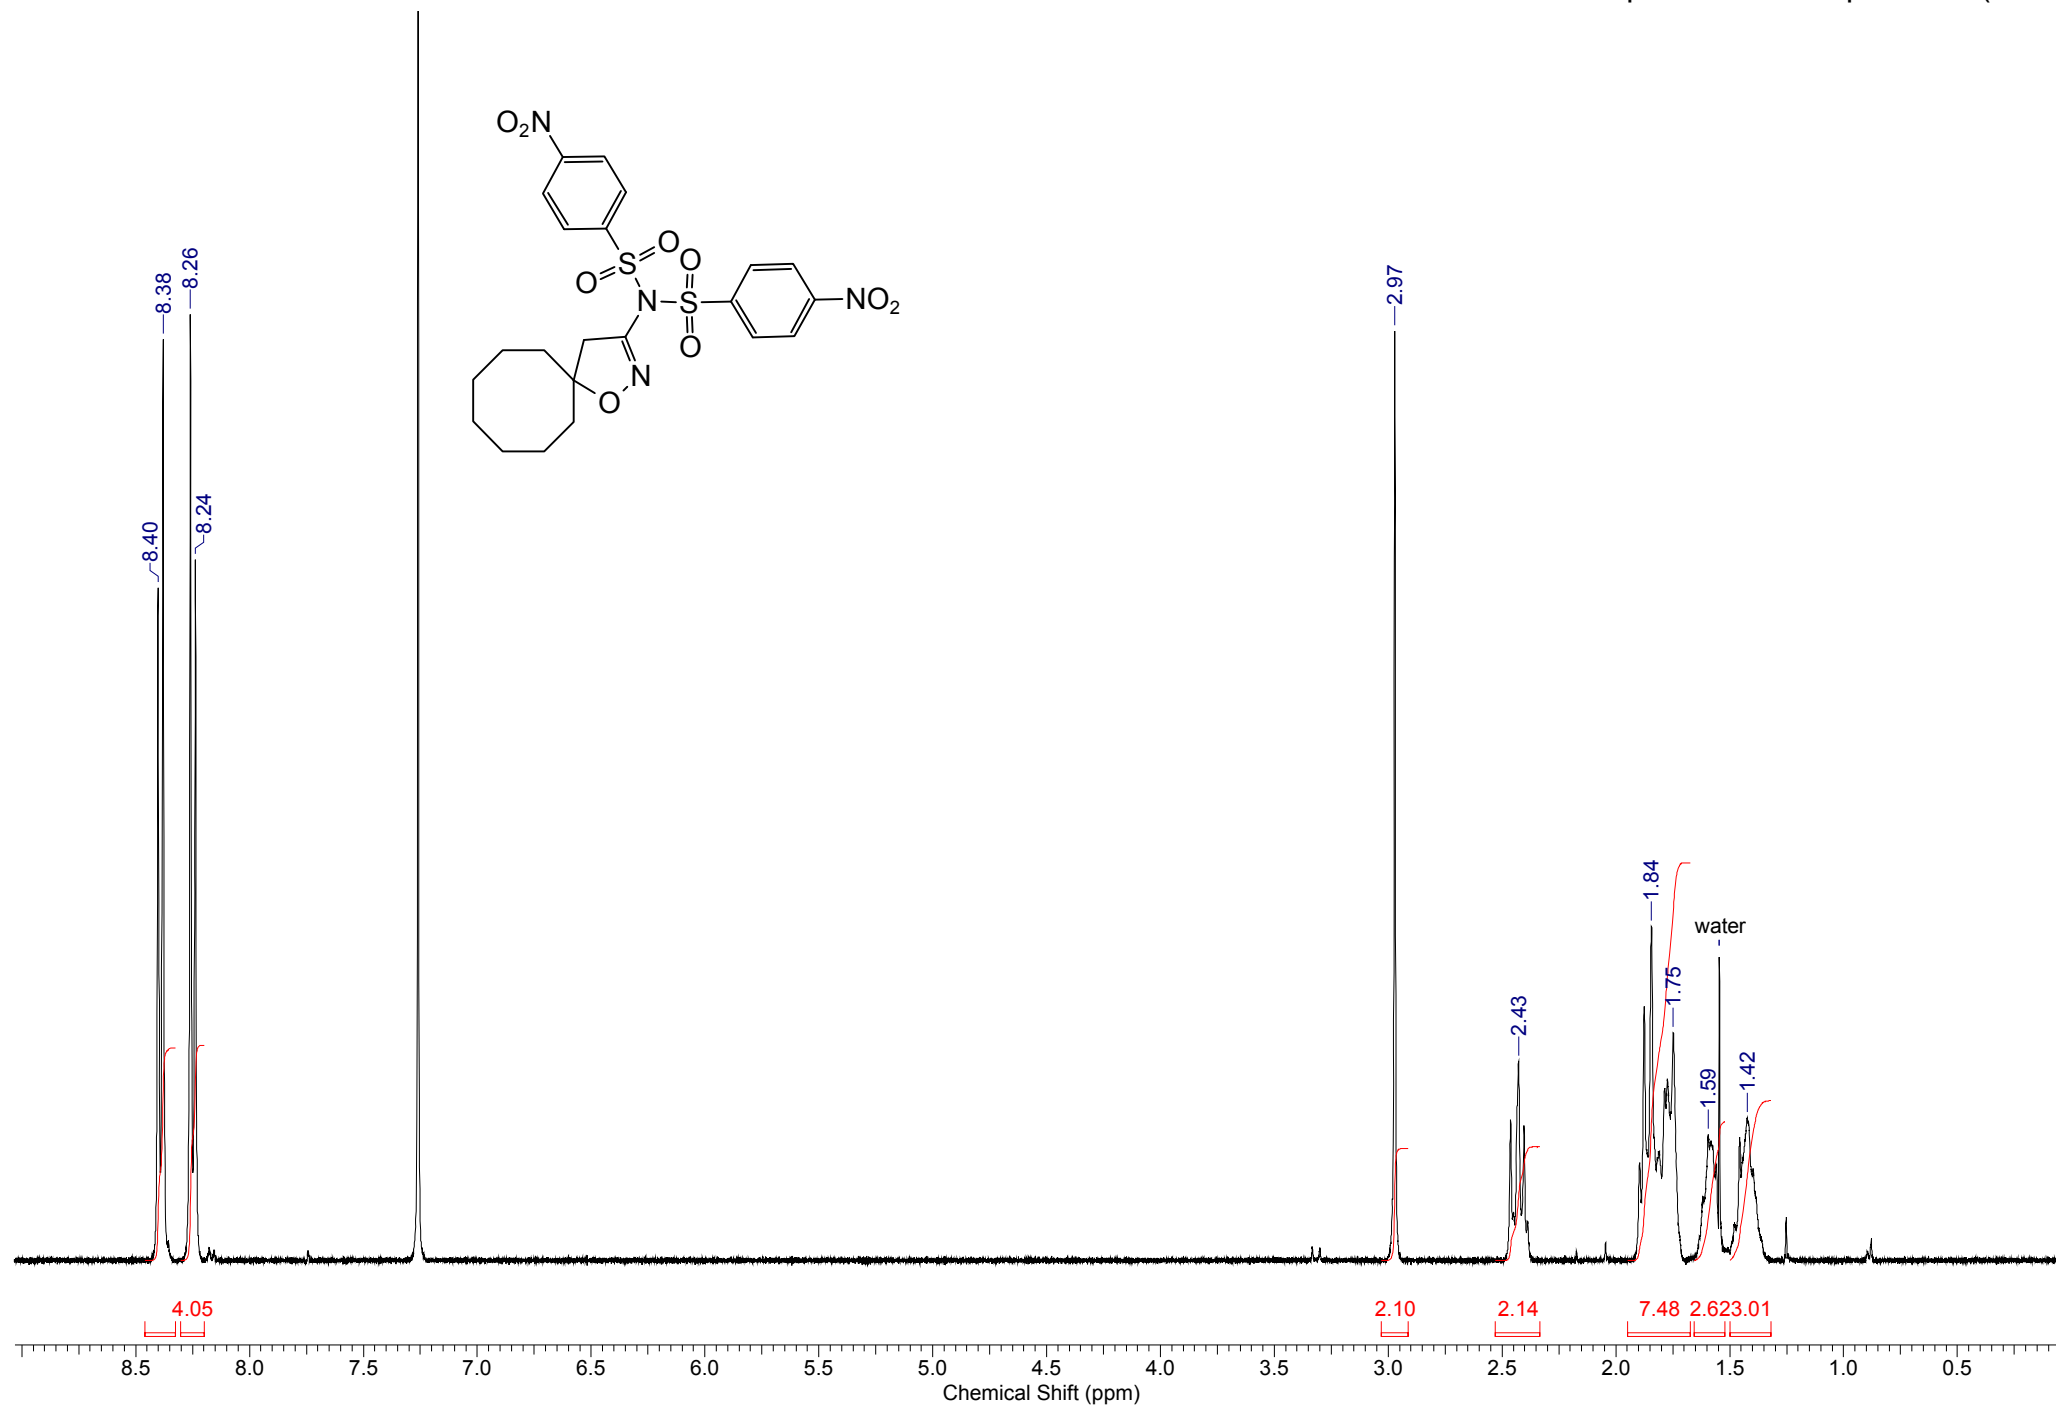

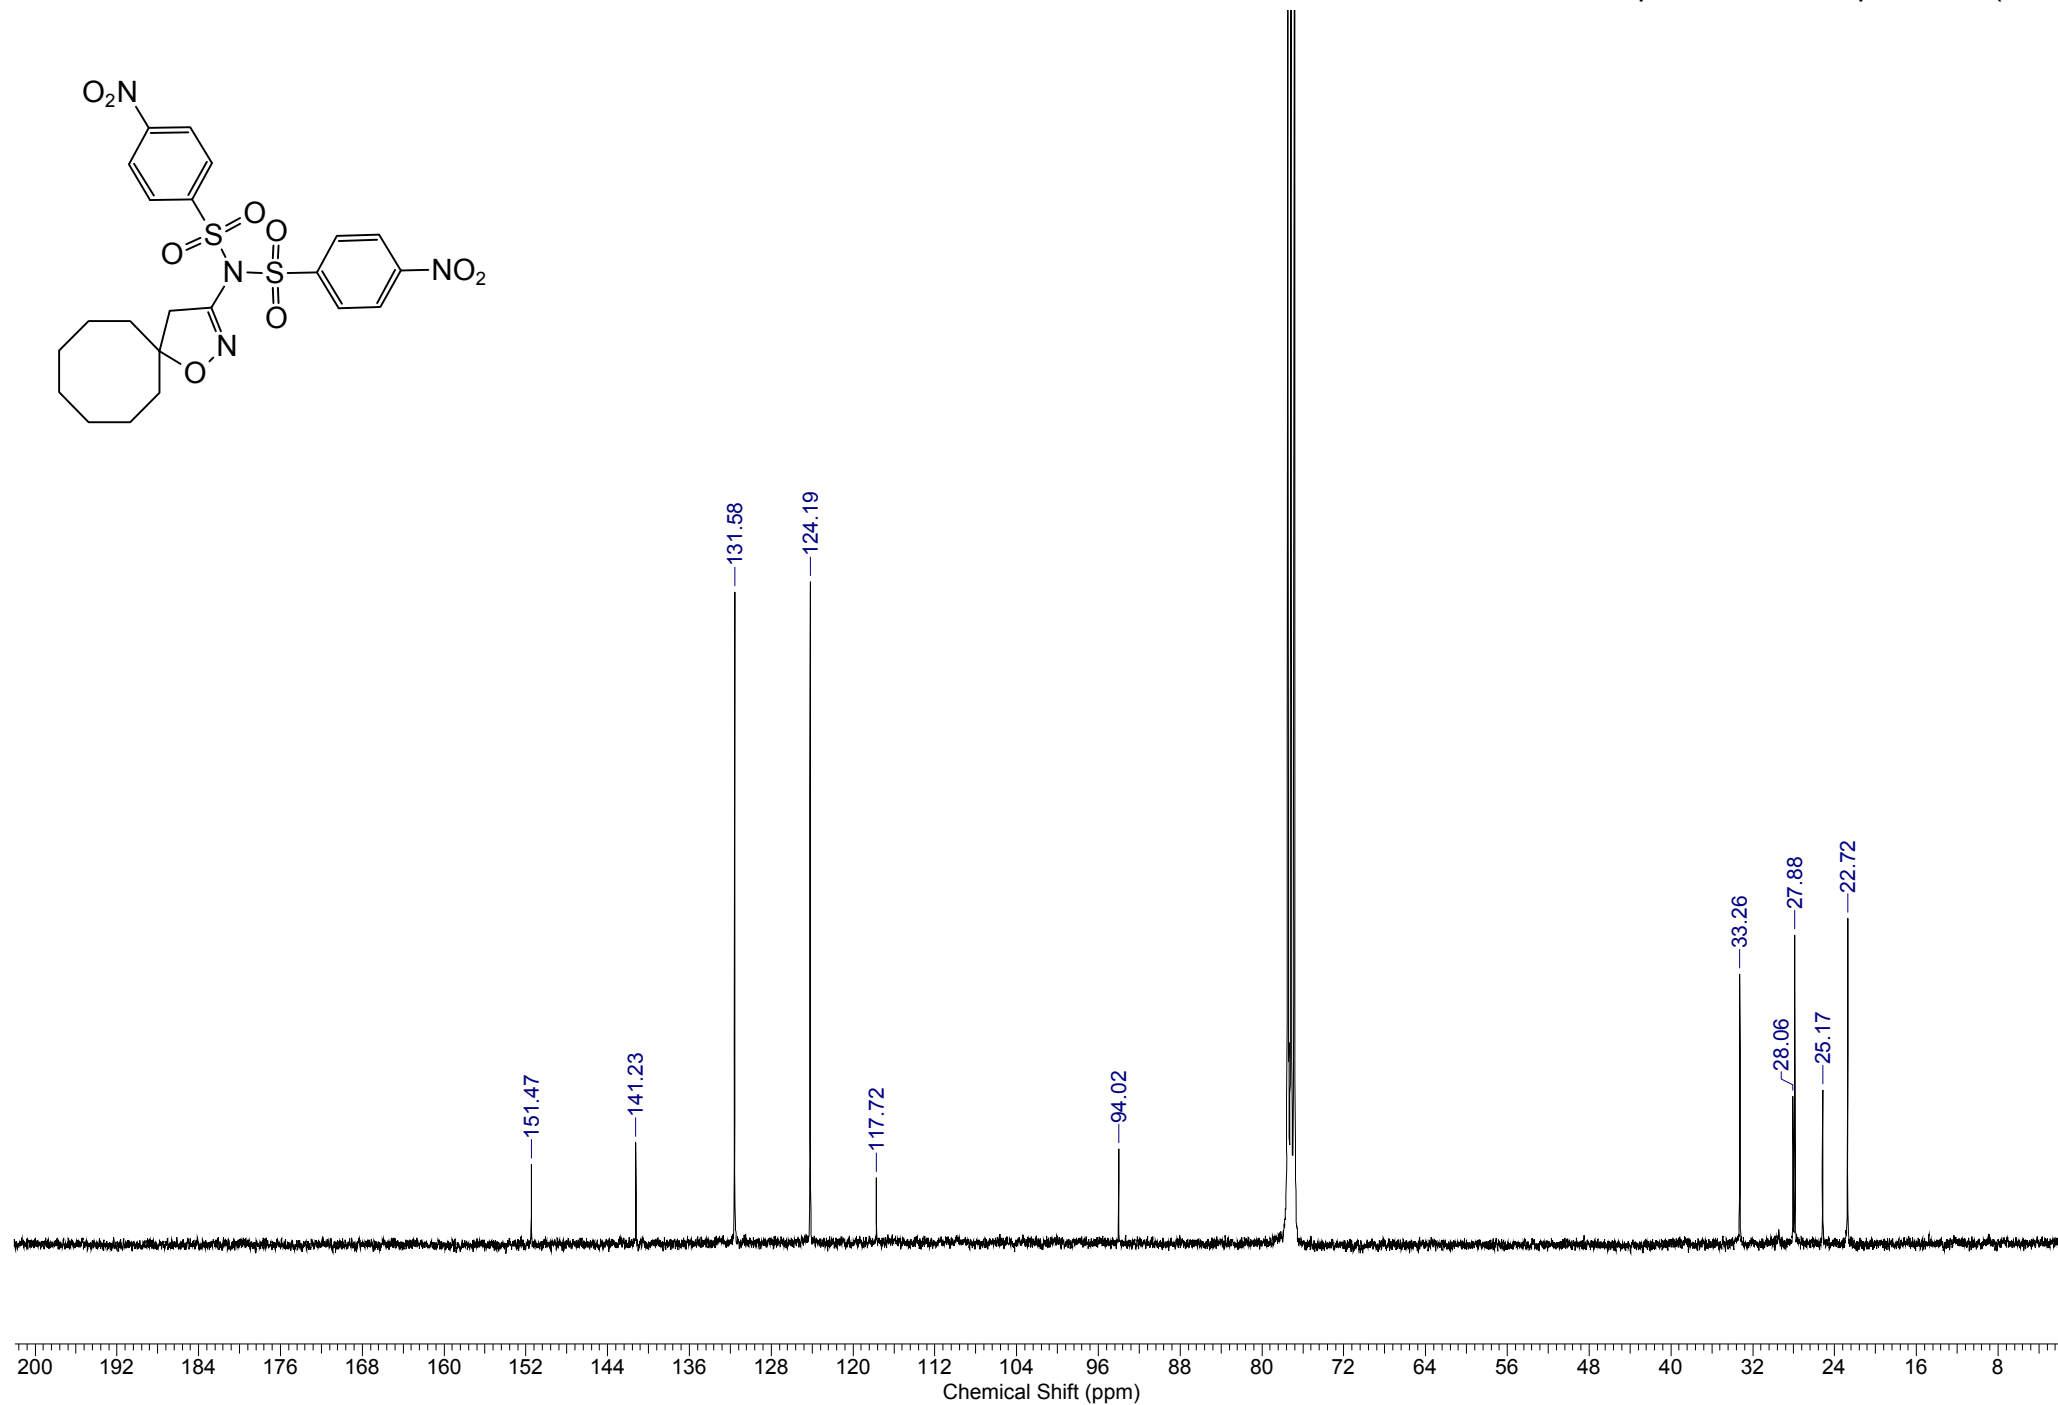



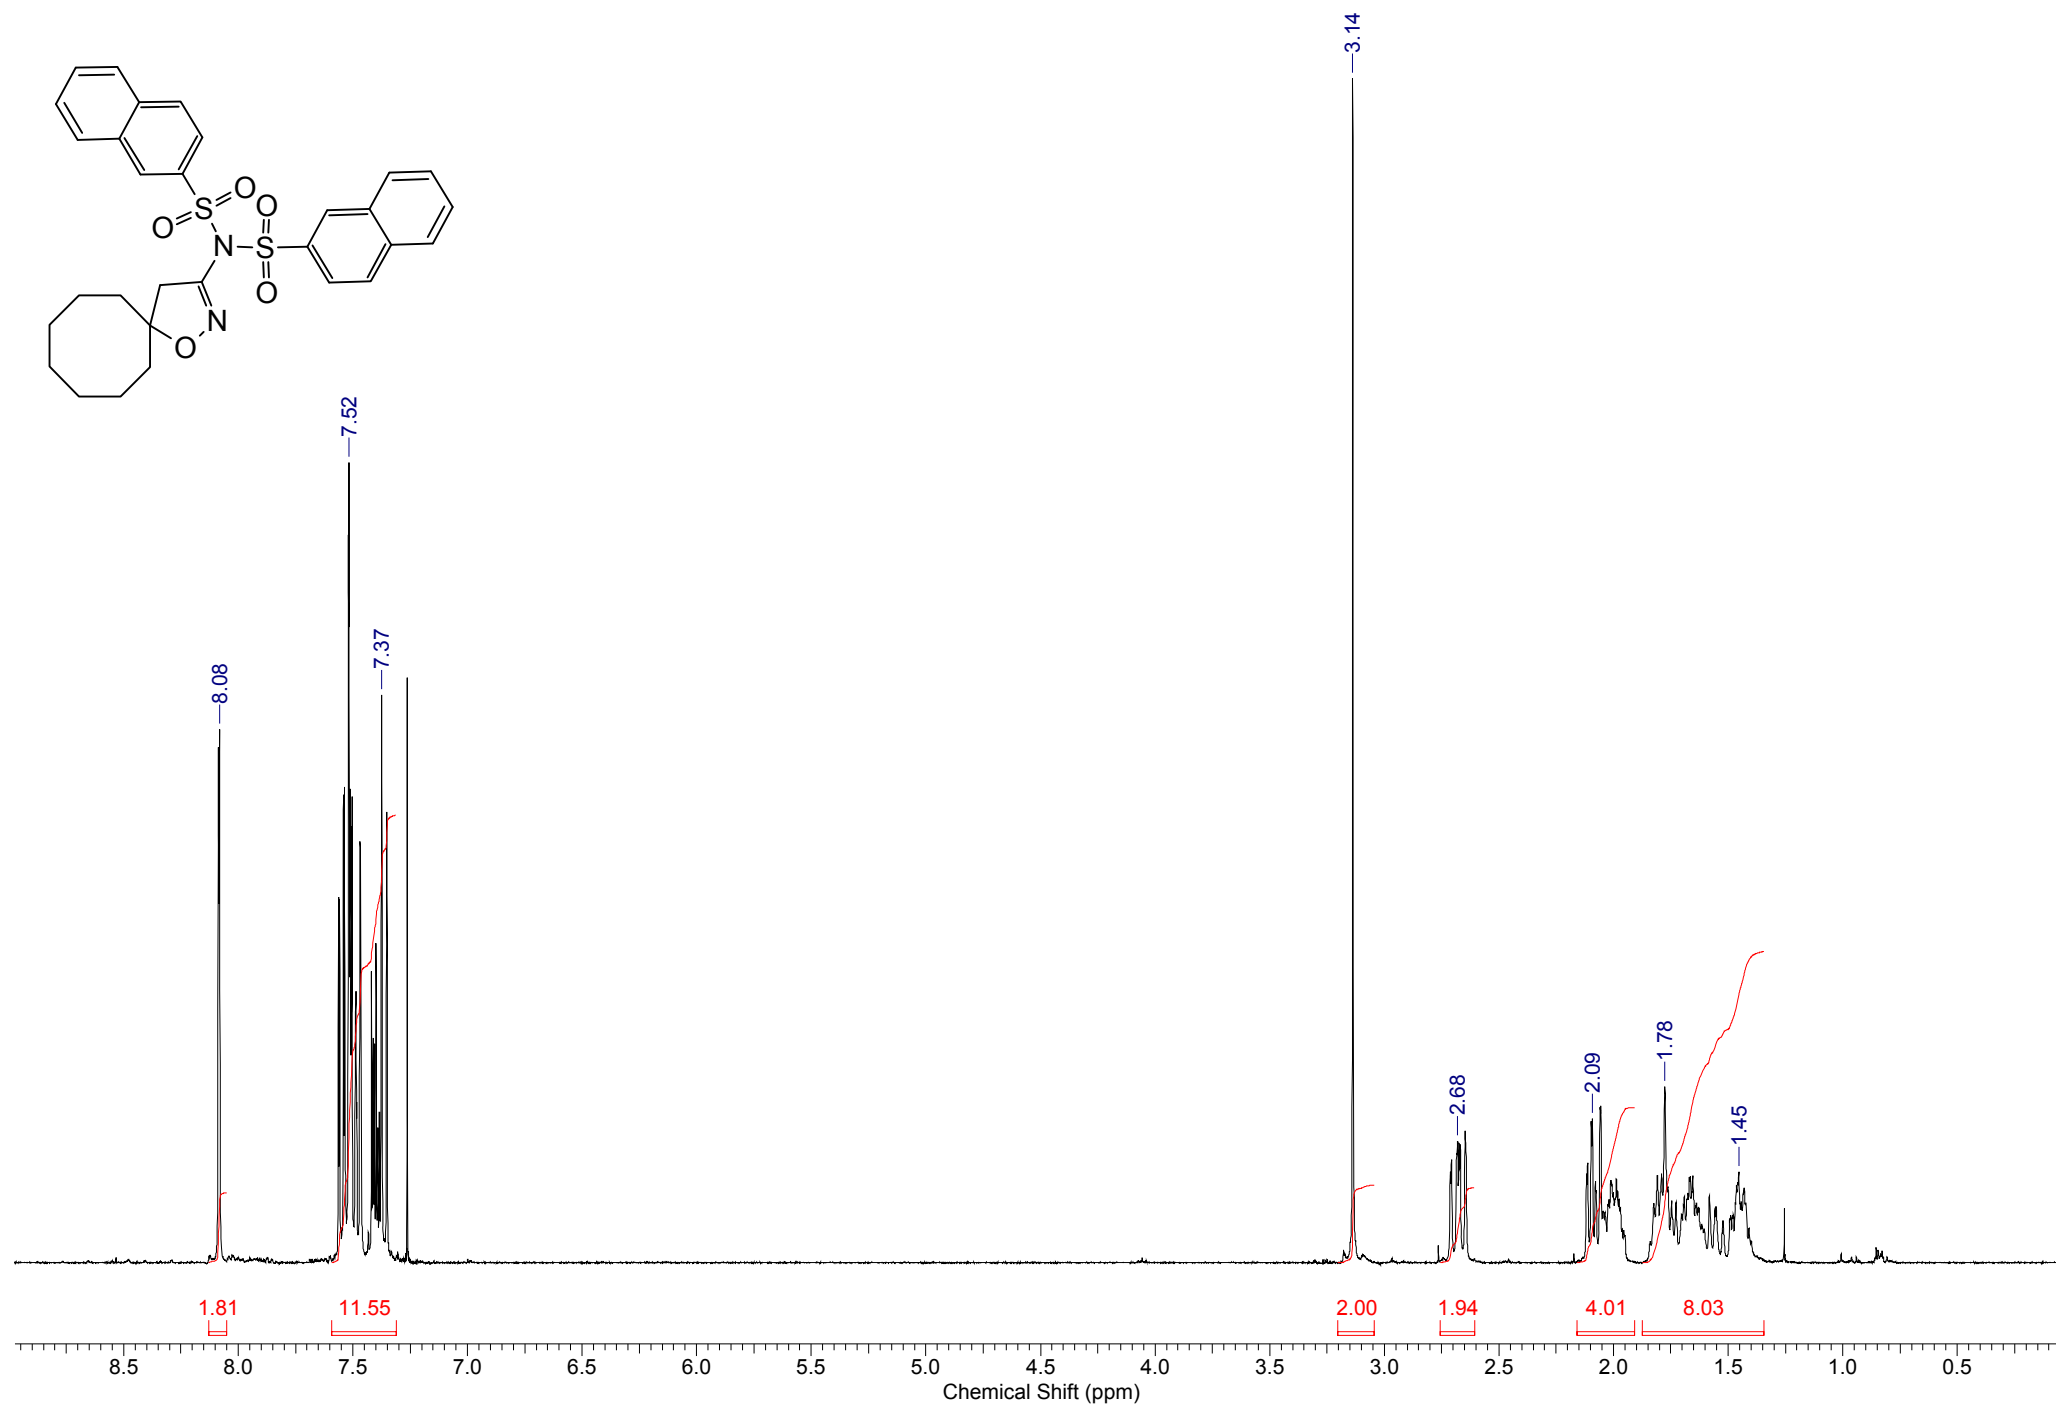

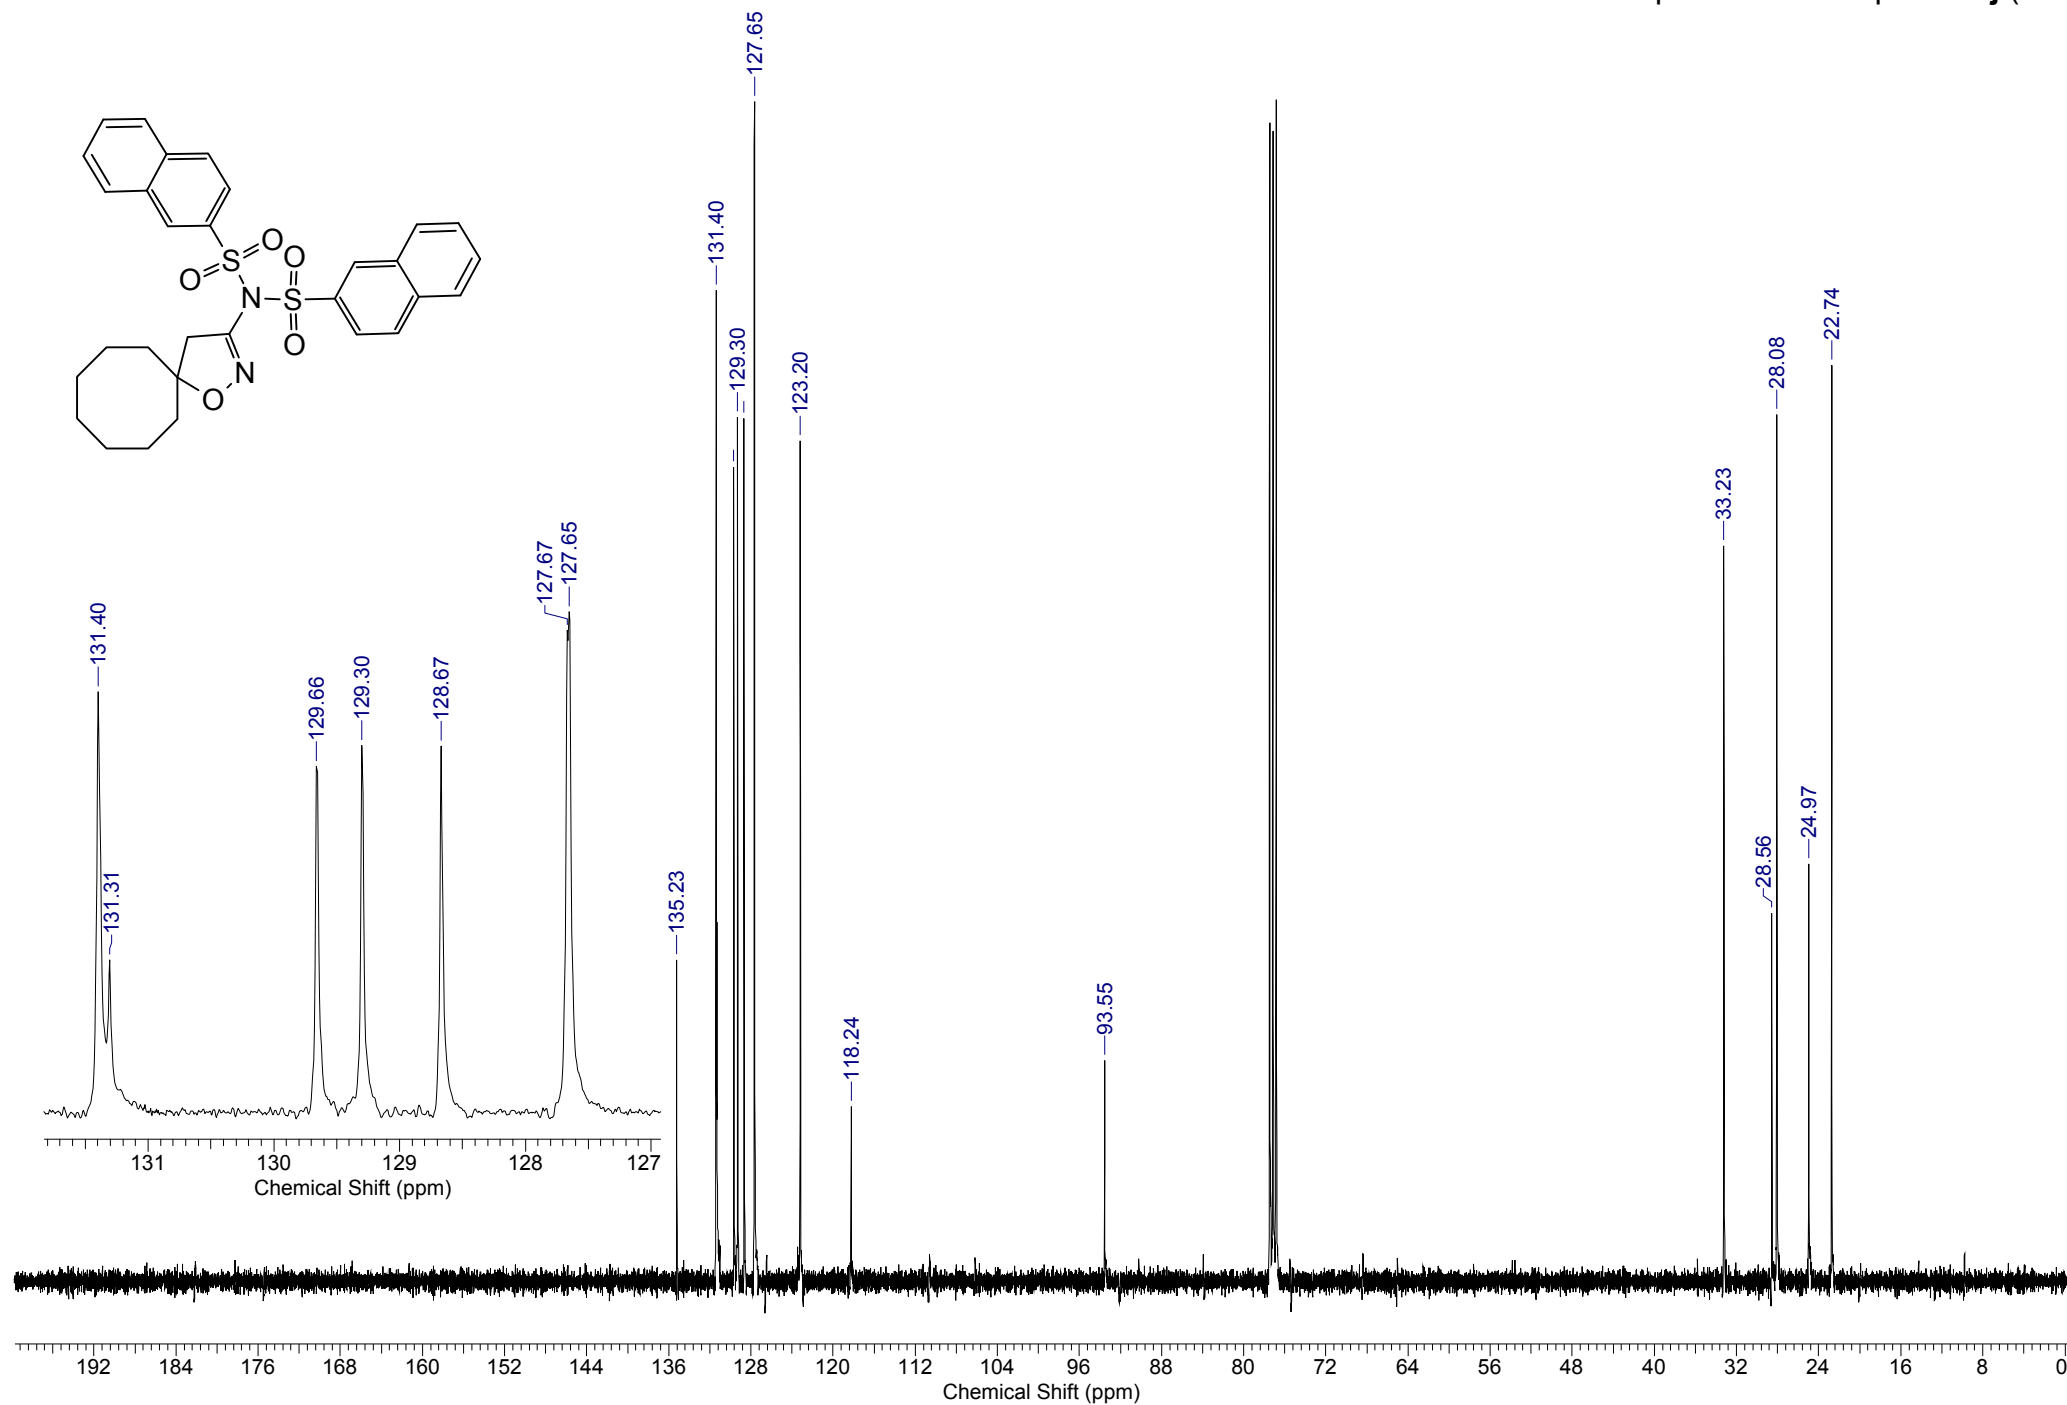

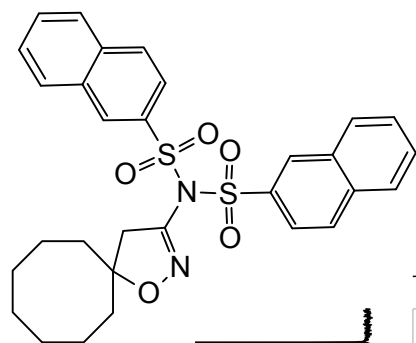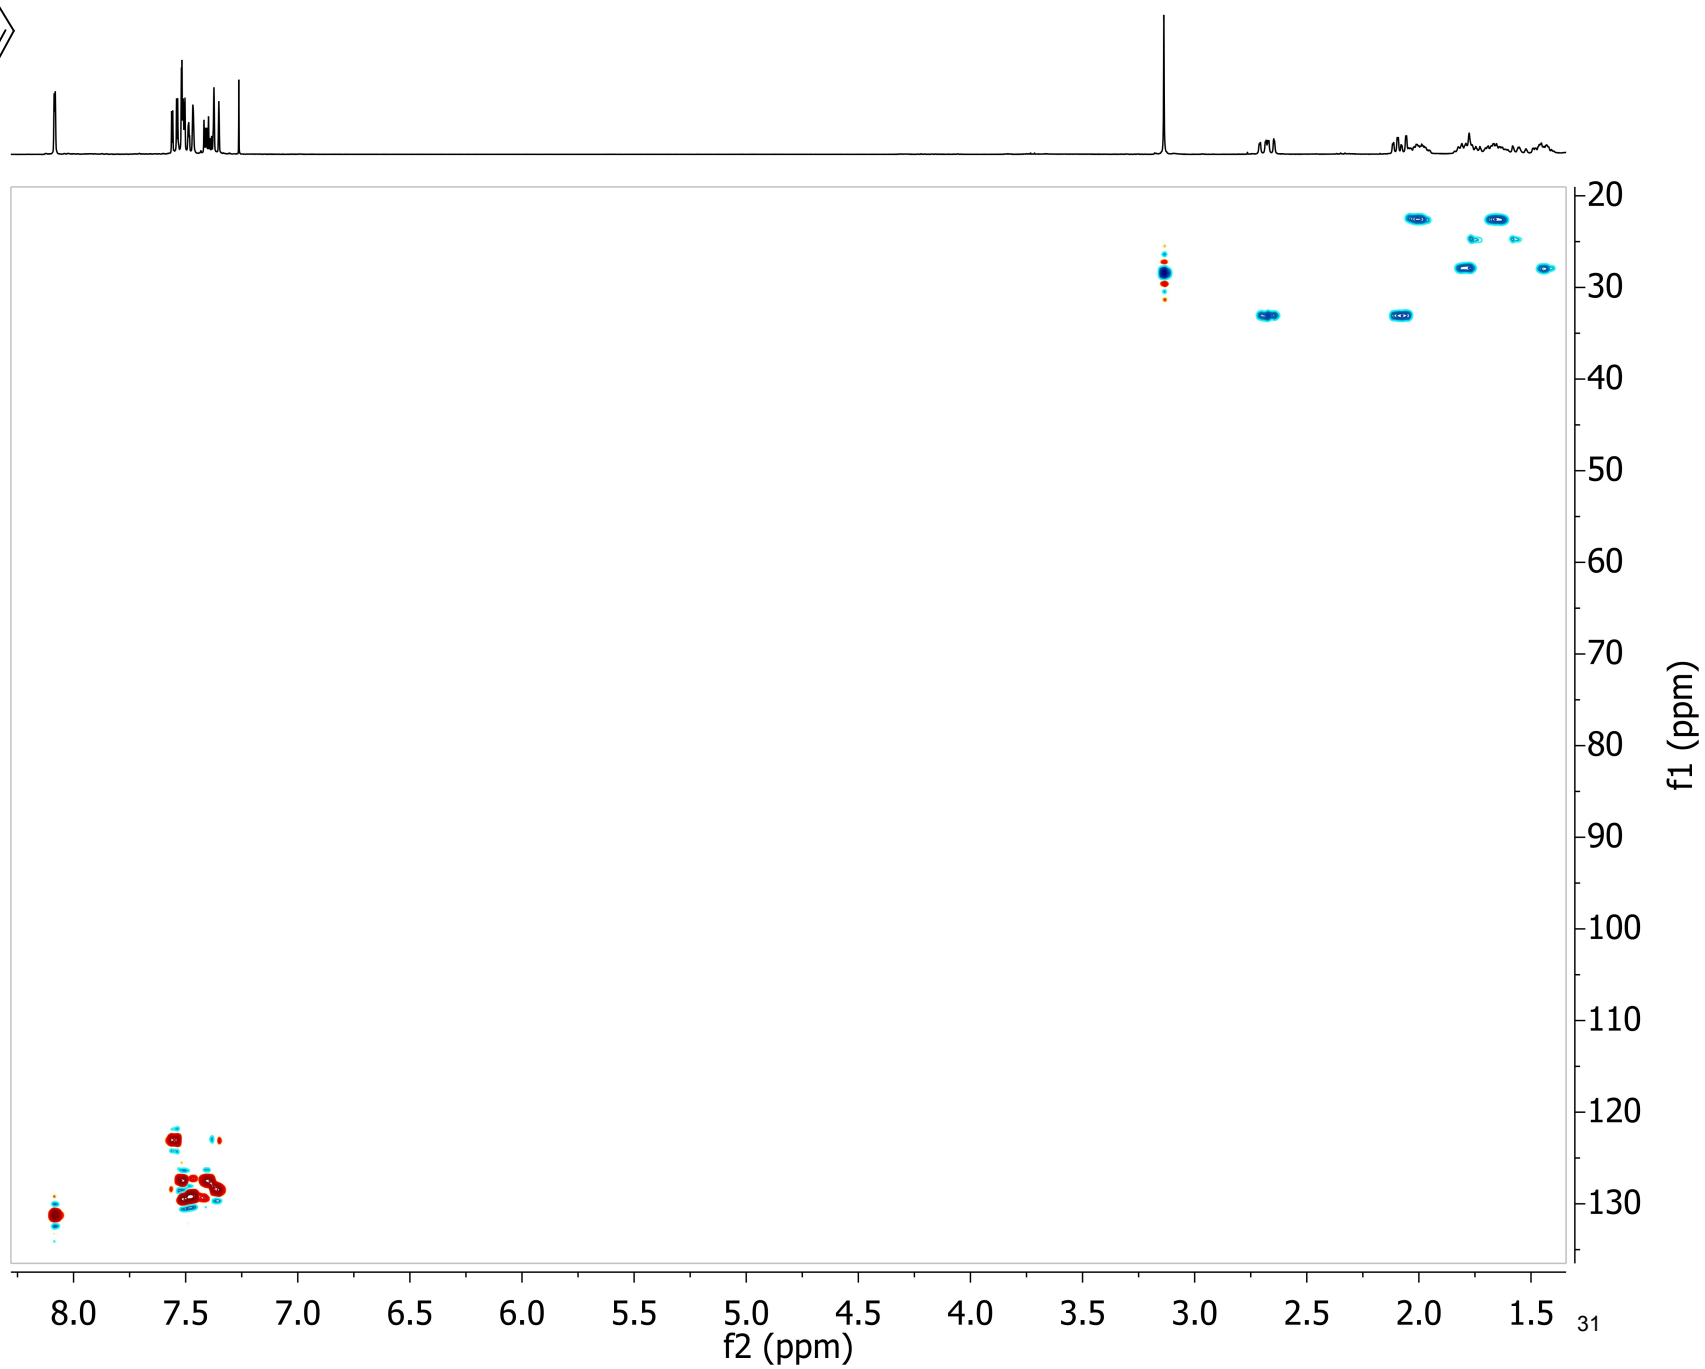

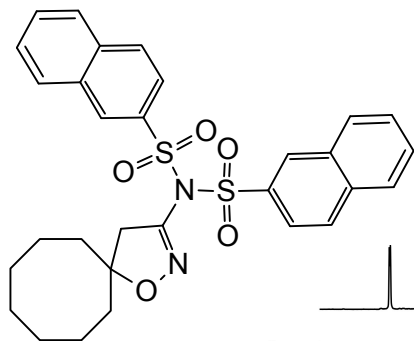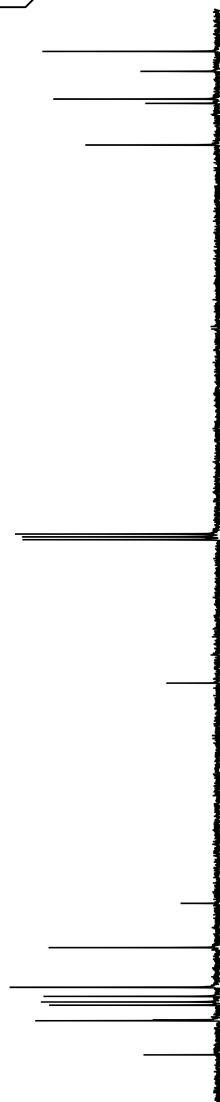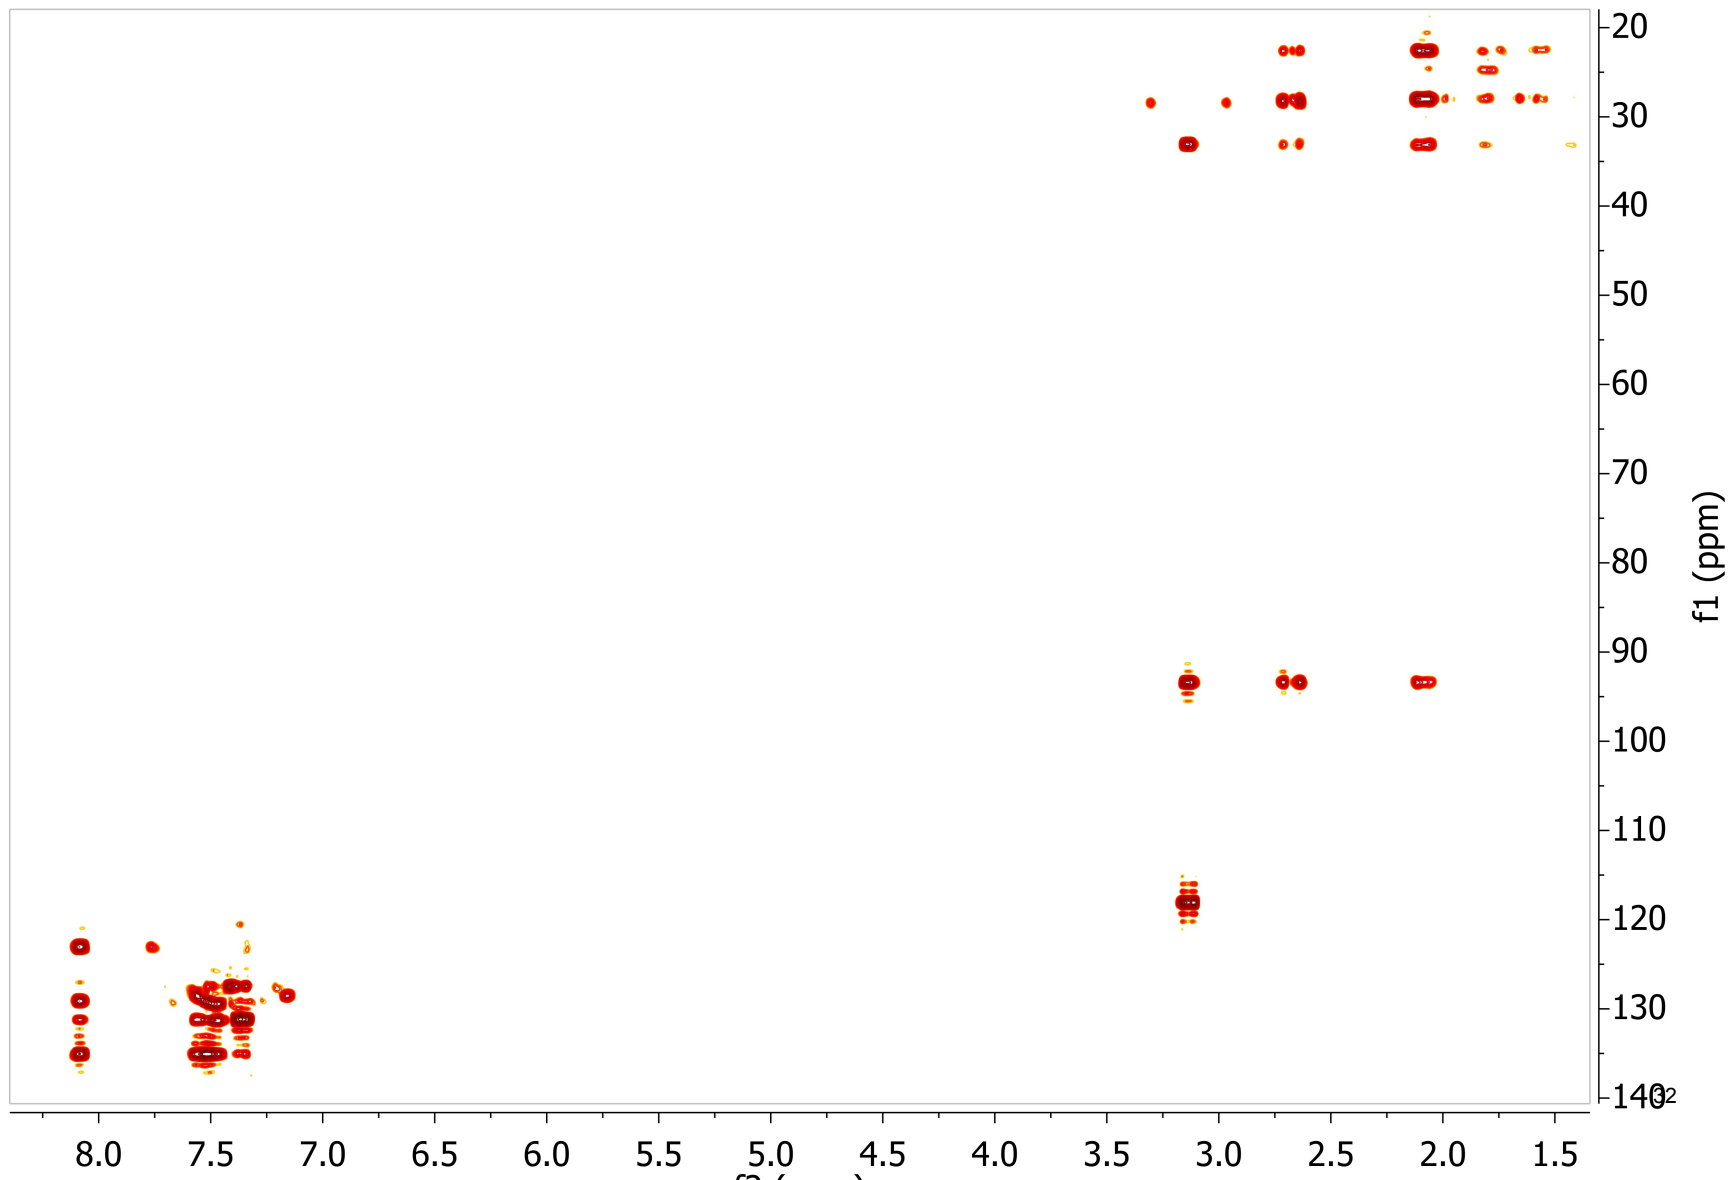

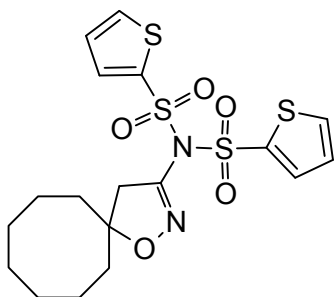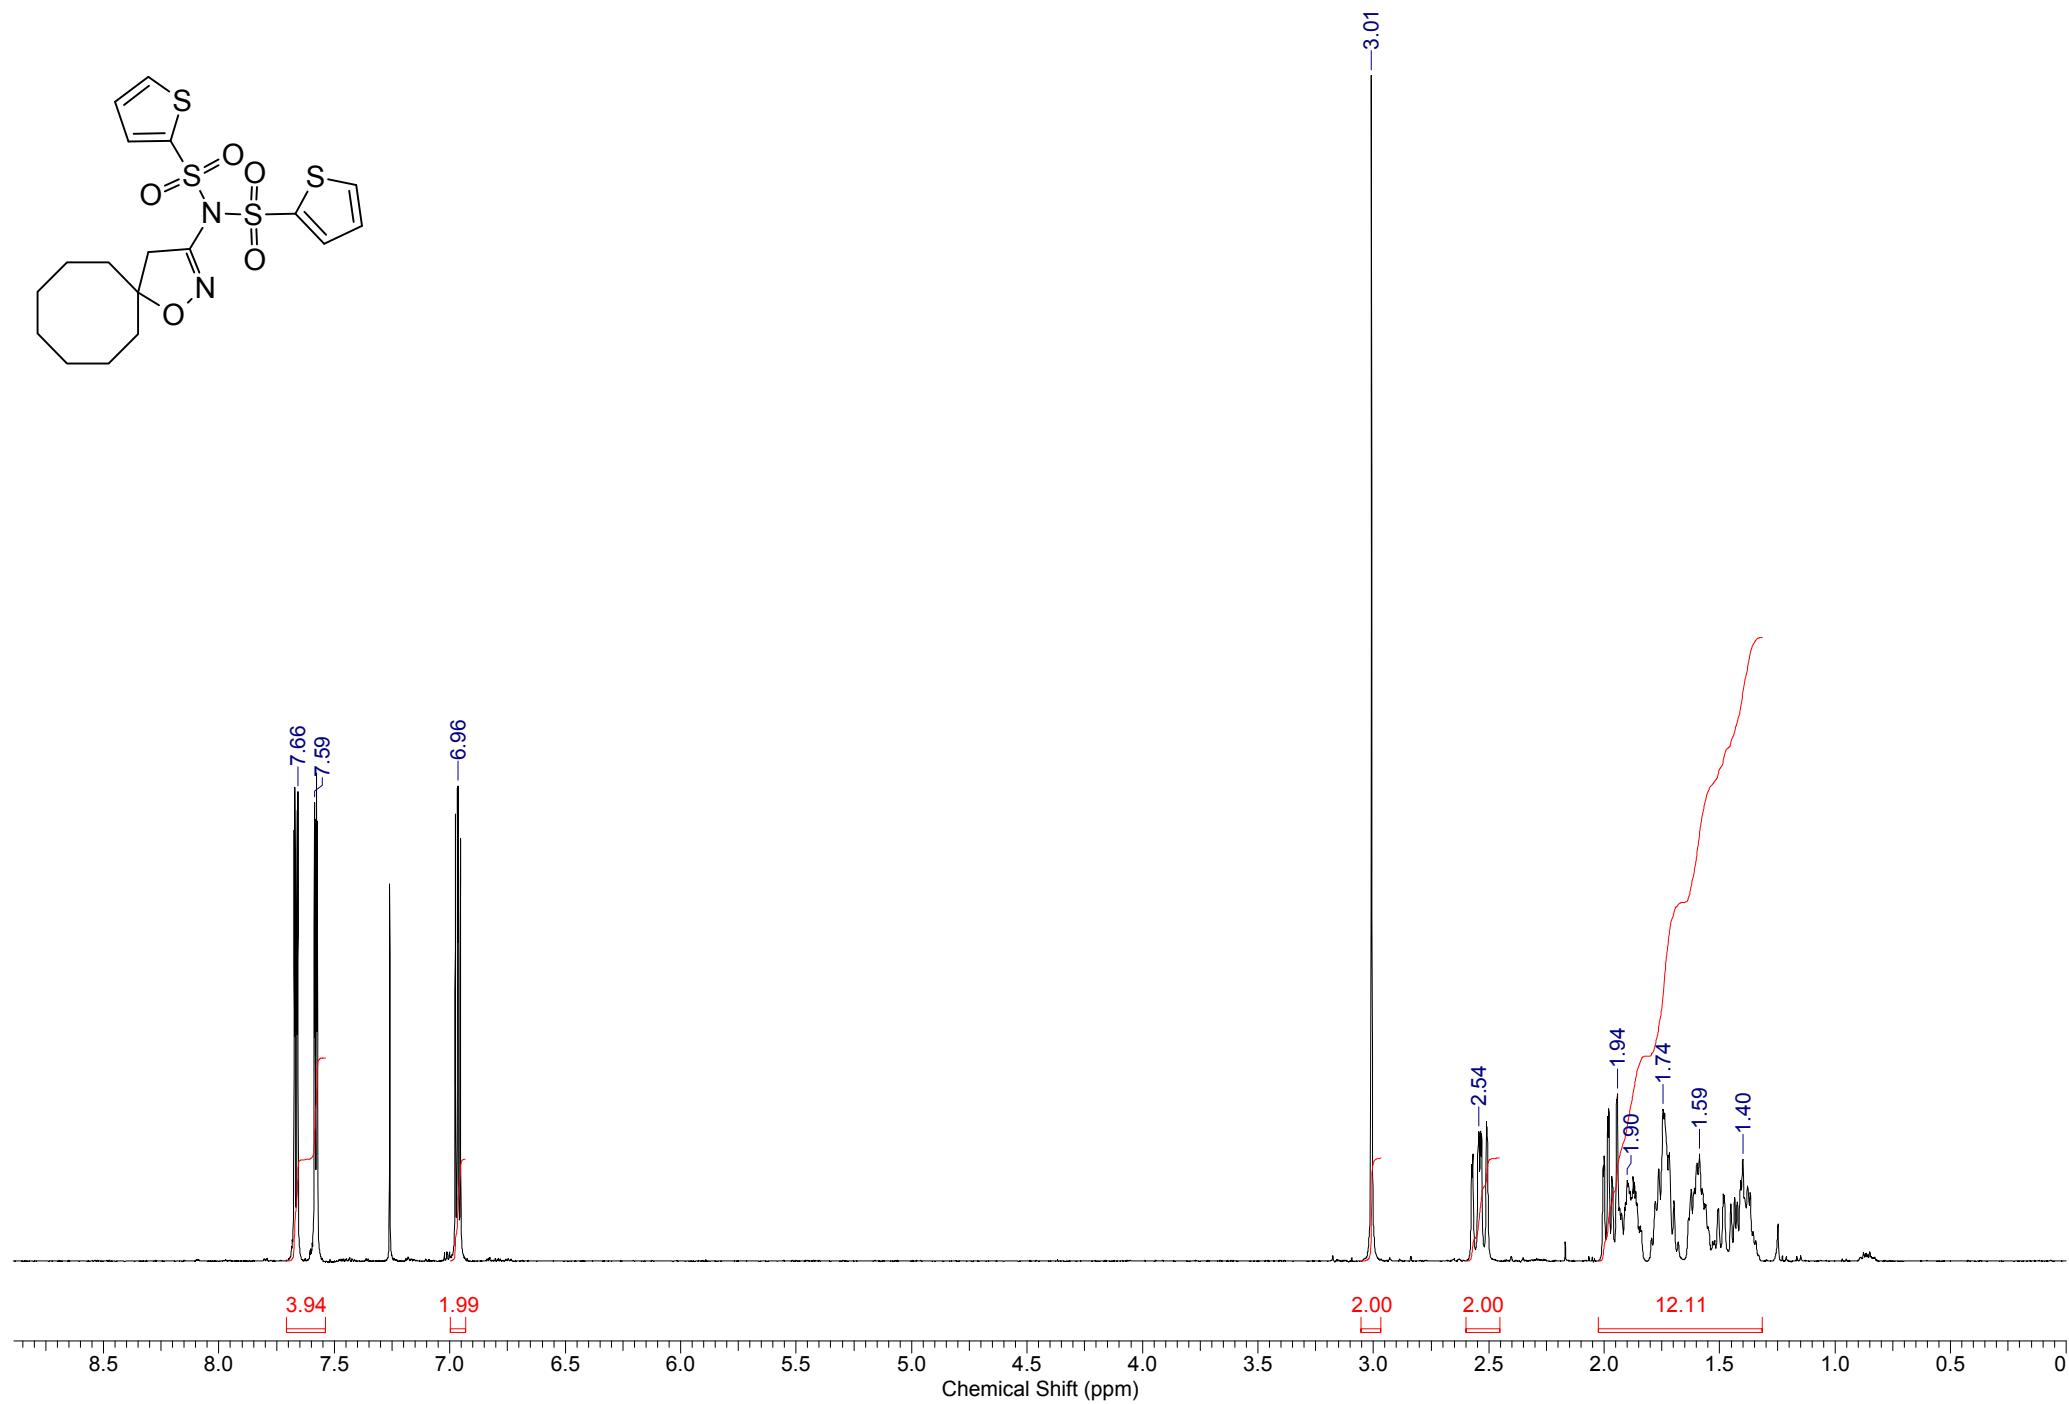

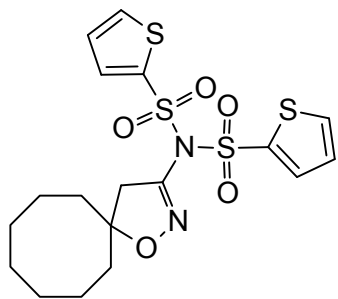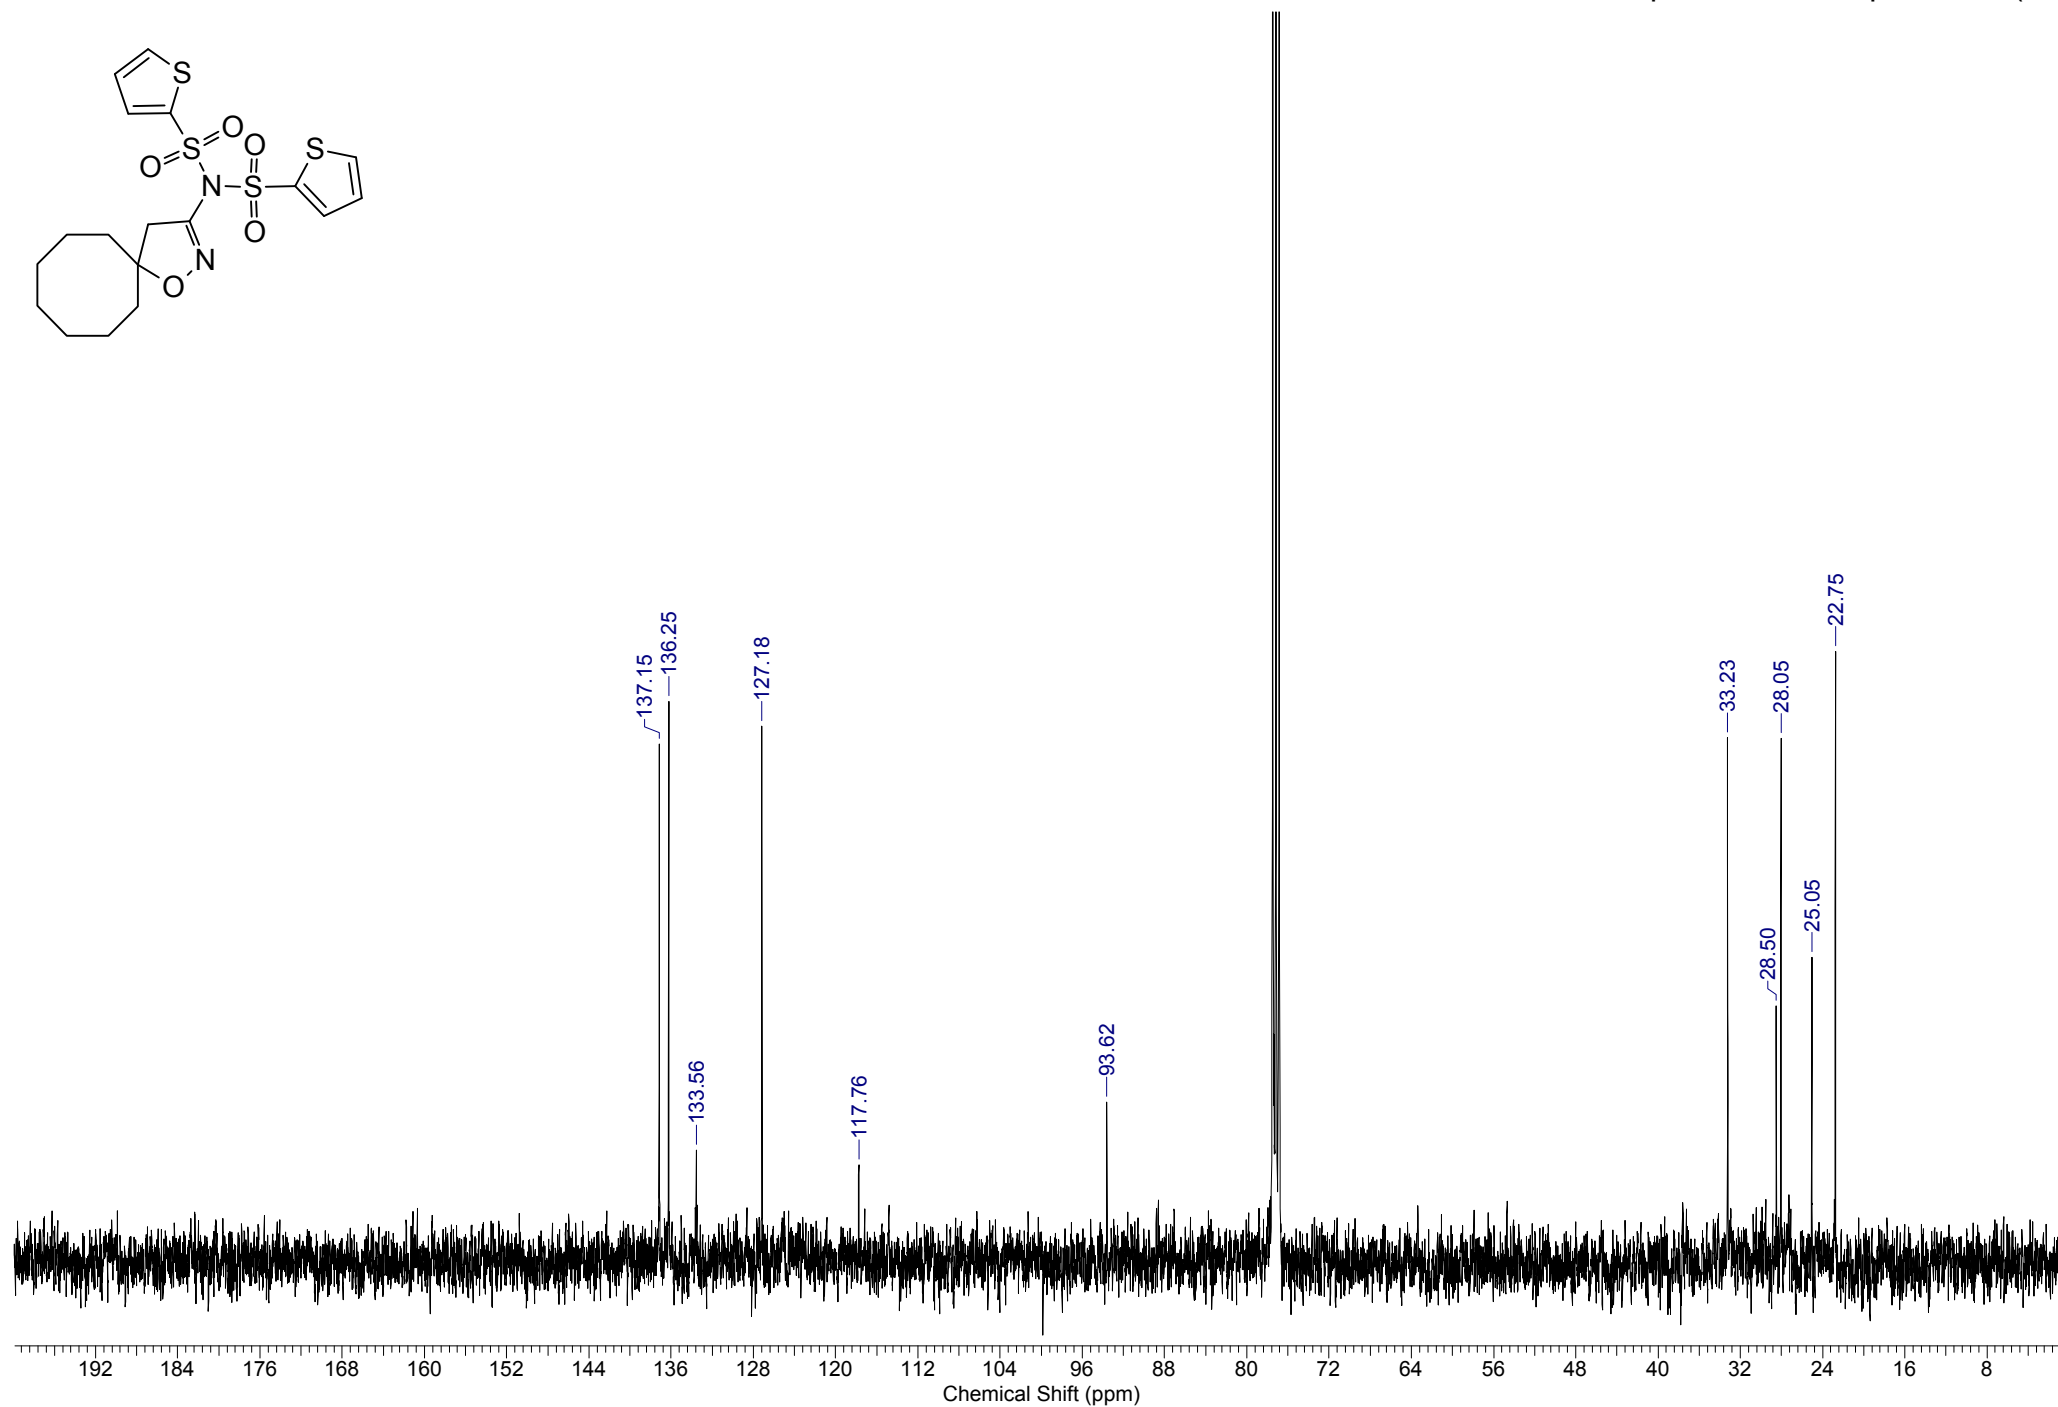

<sup>1</sup>H NMR spectrum of compound **4I** (CDCl<sub>3</sub>)

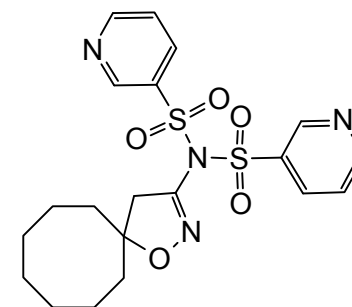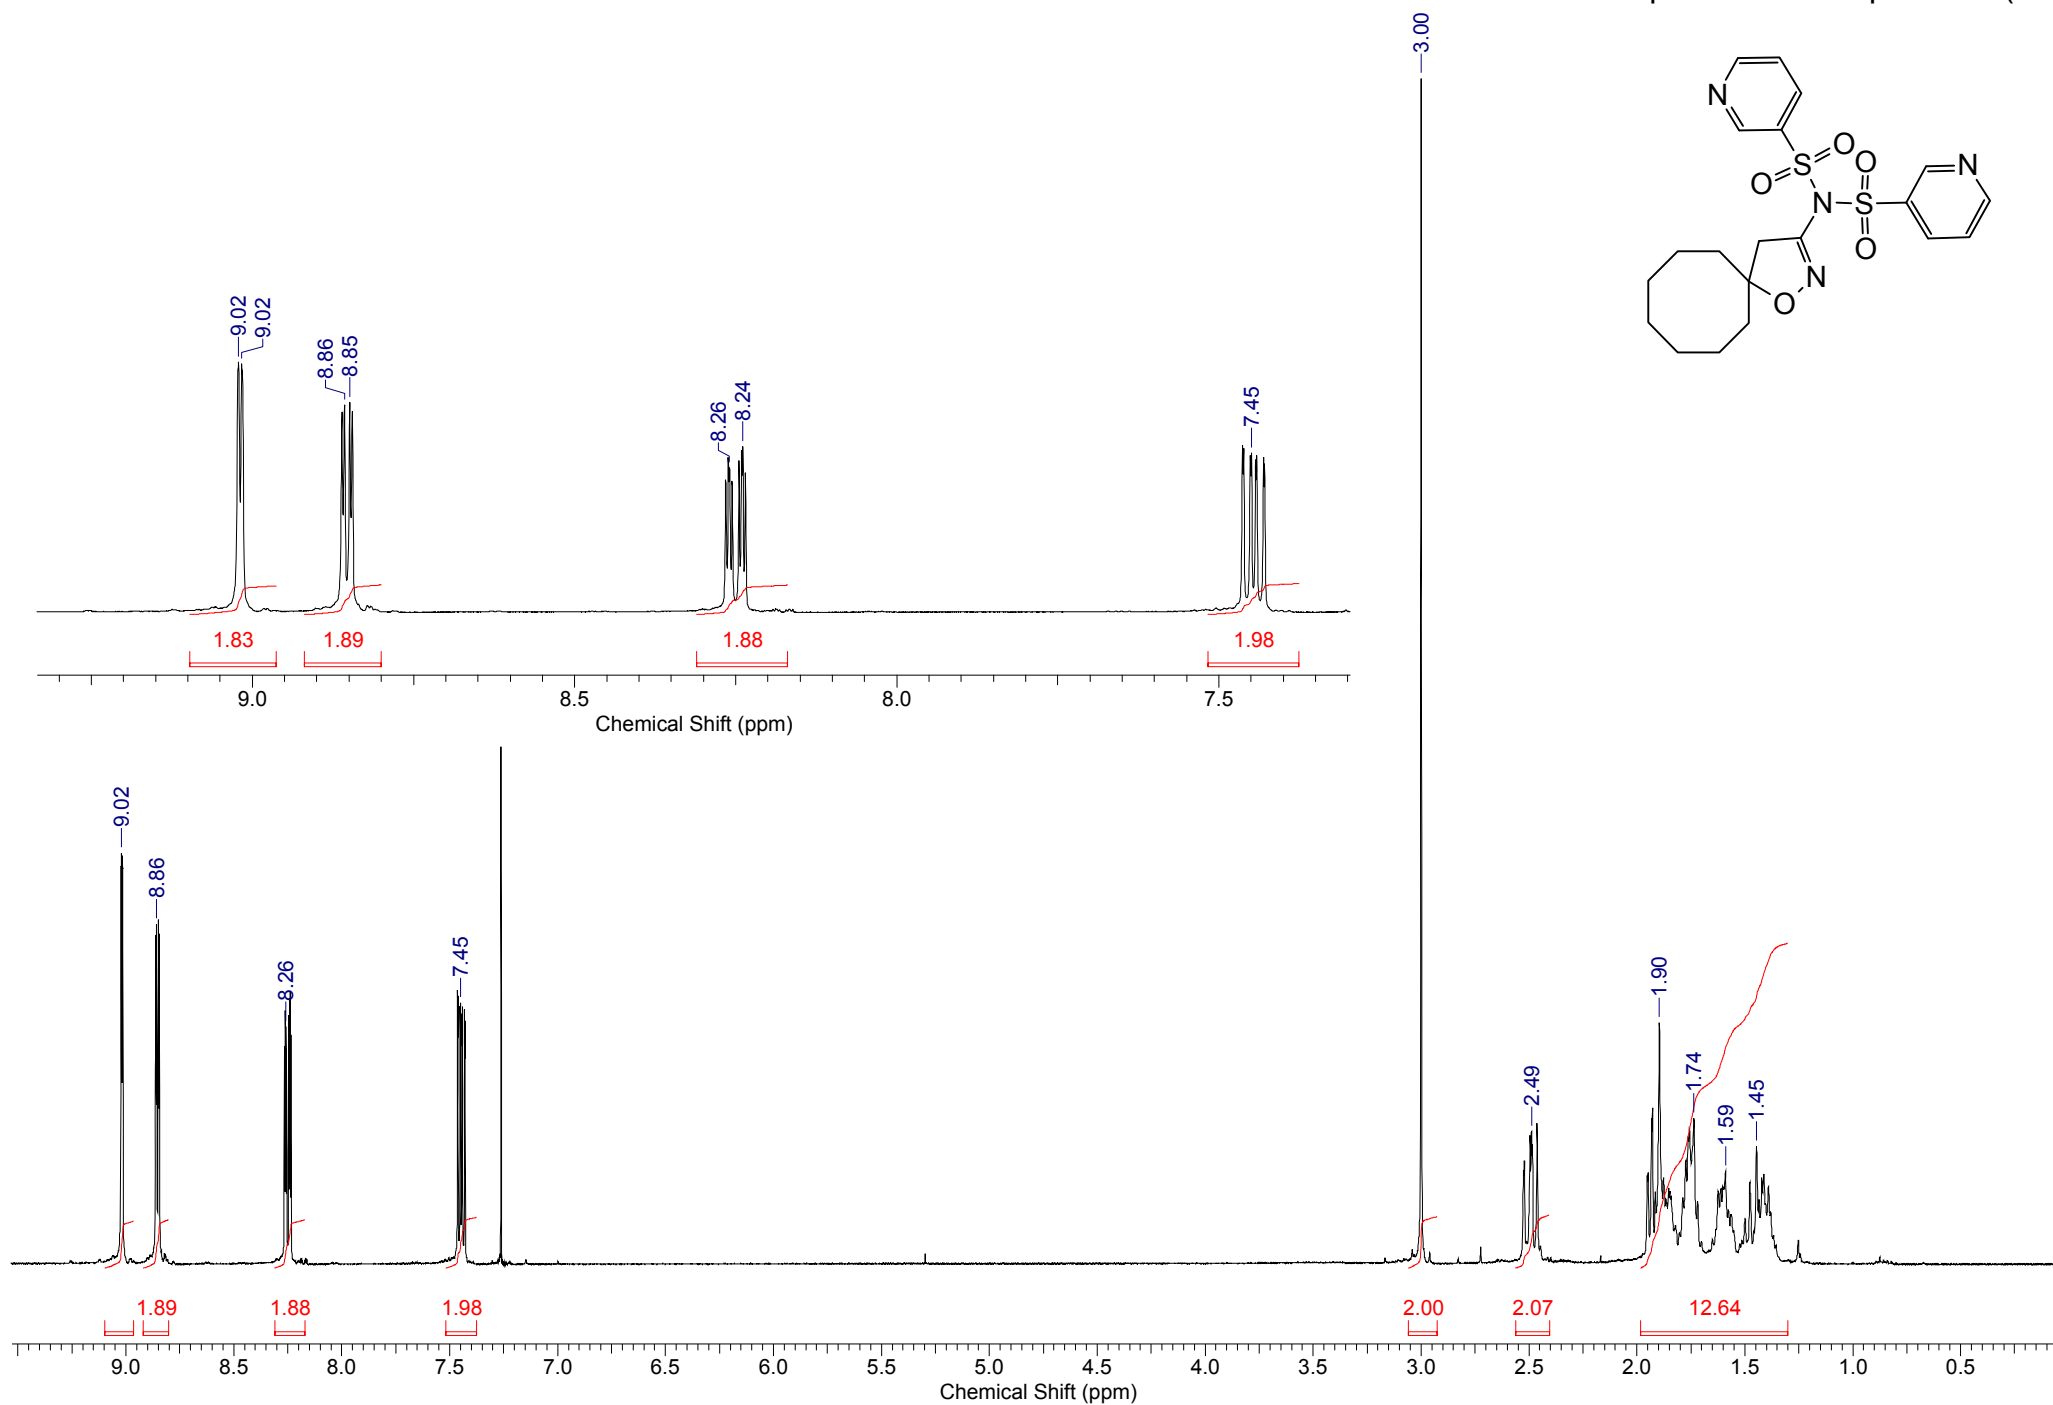

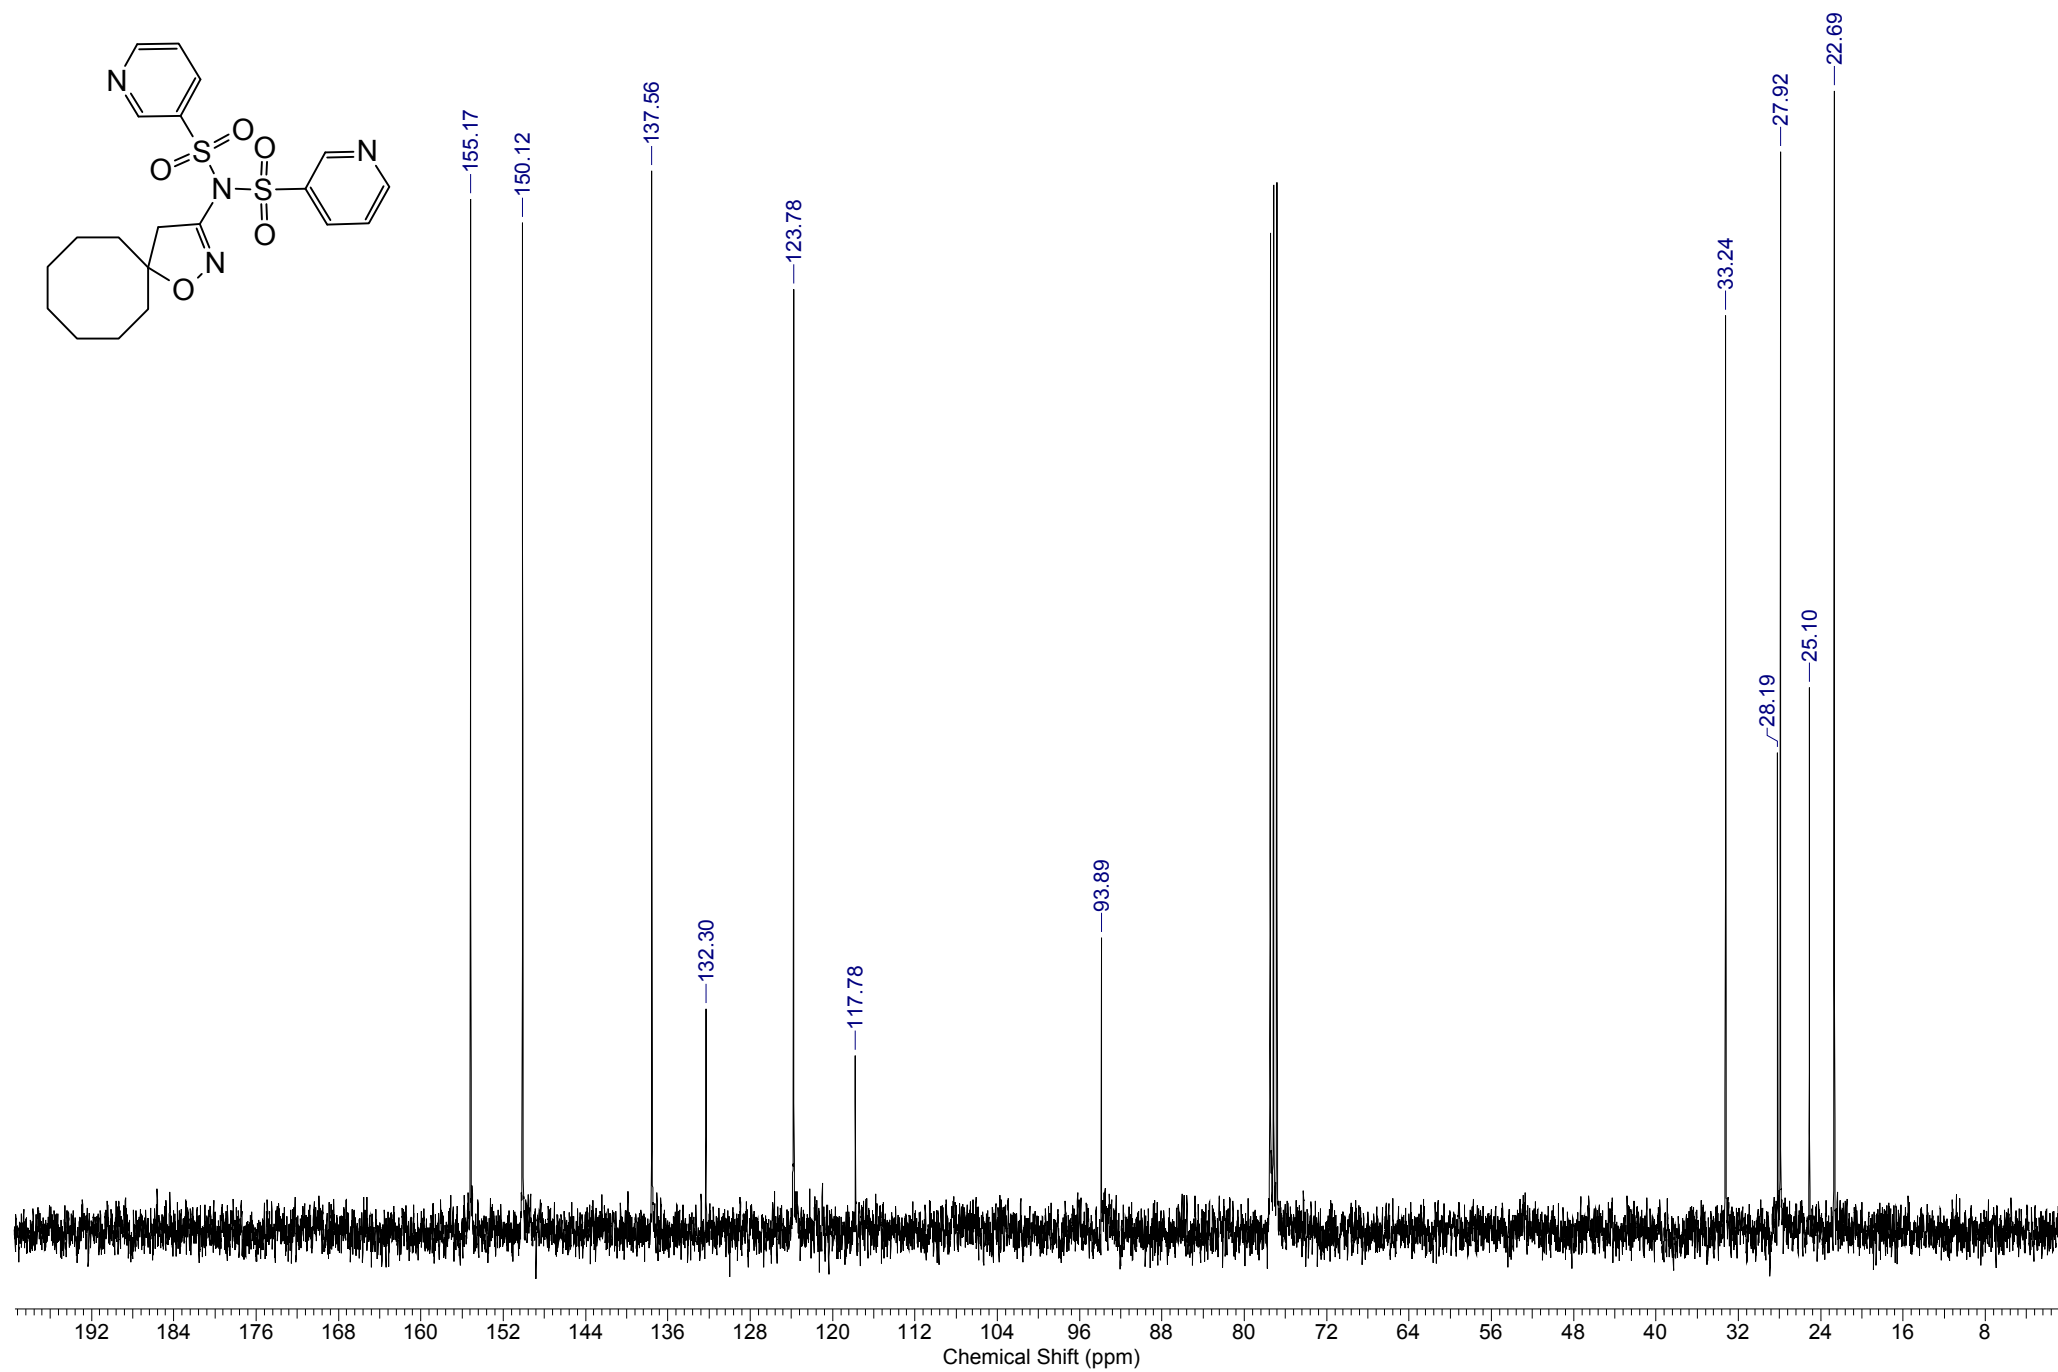



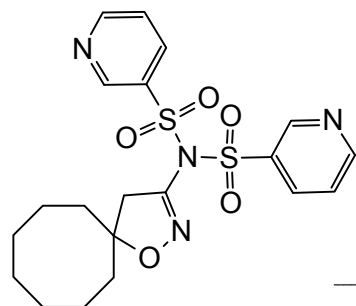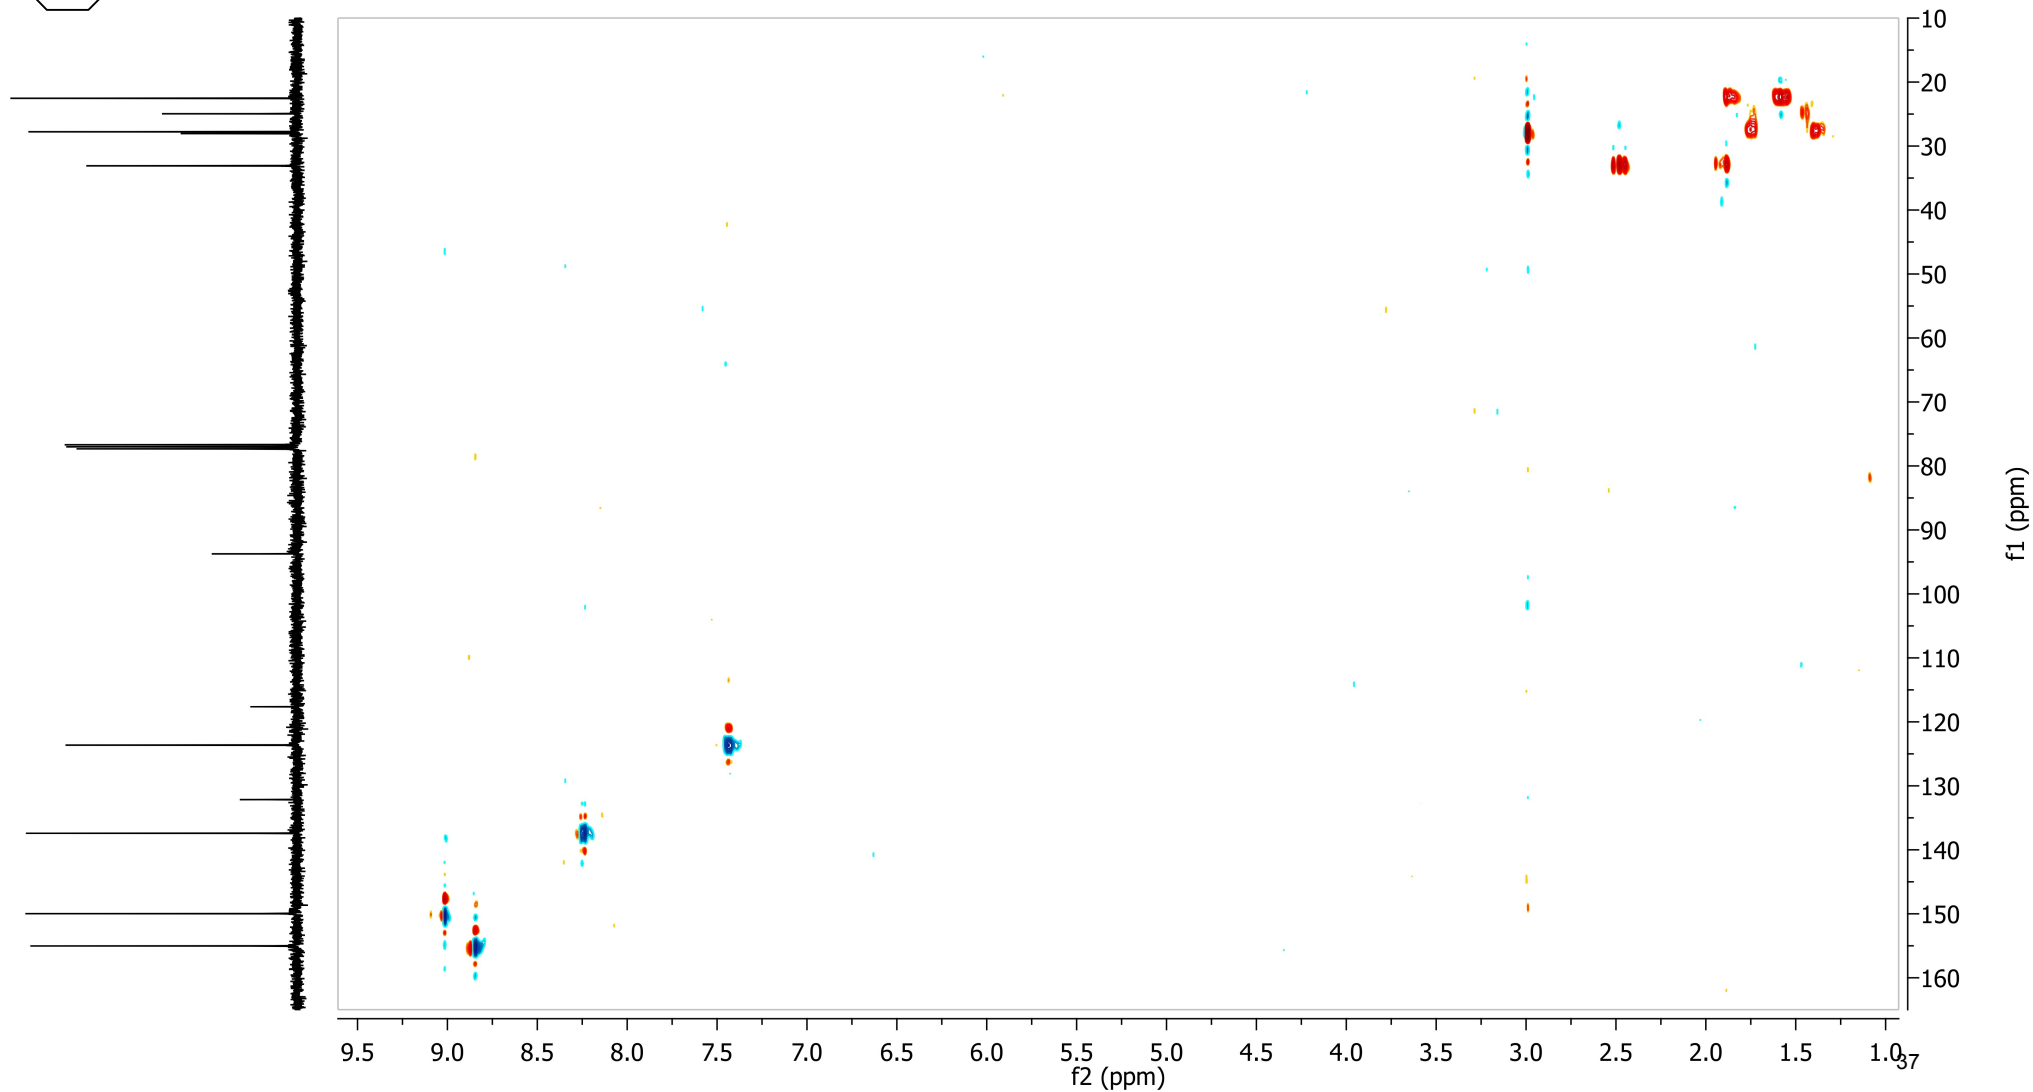

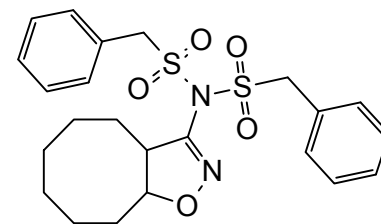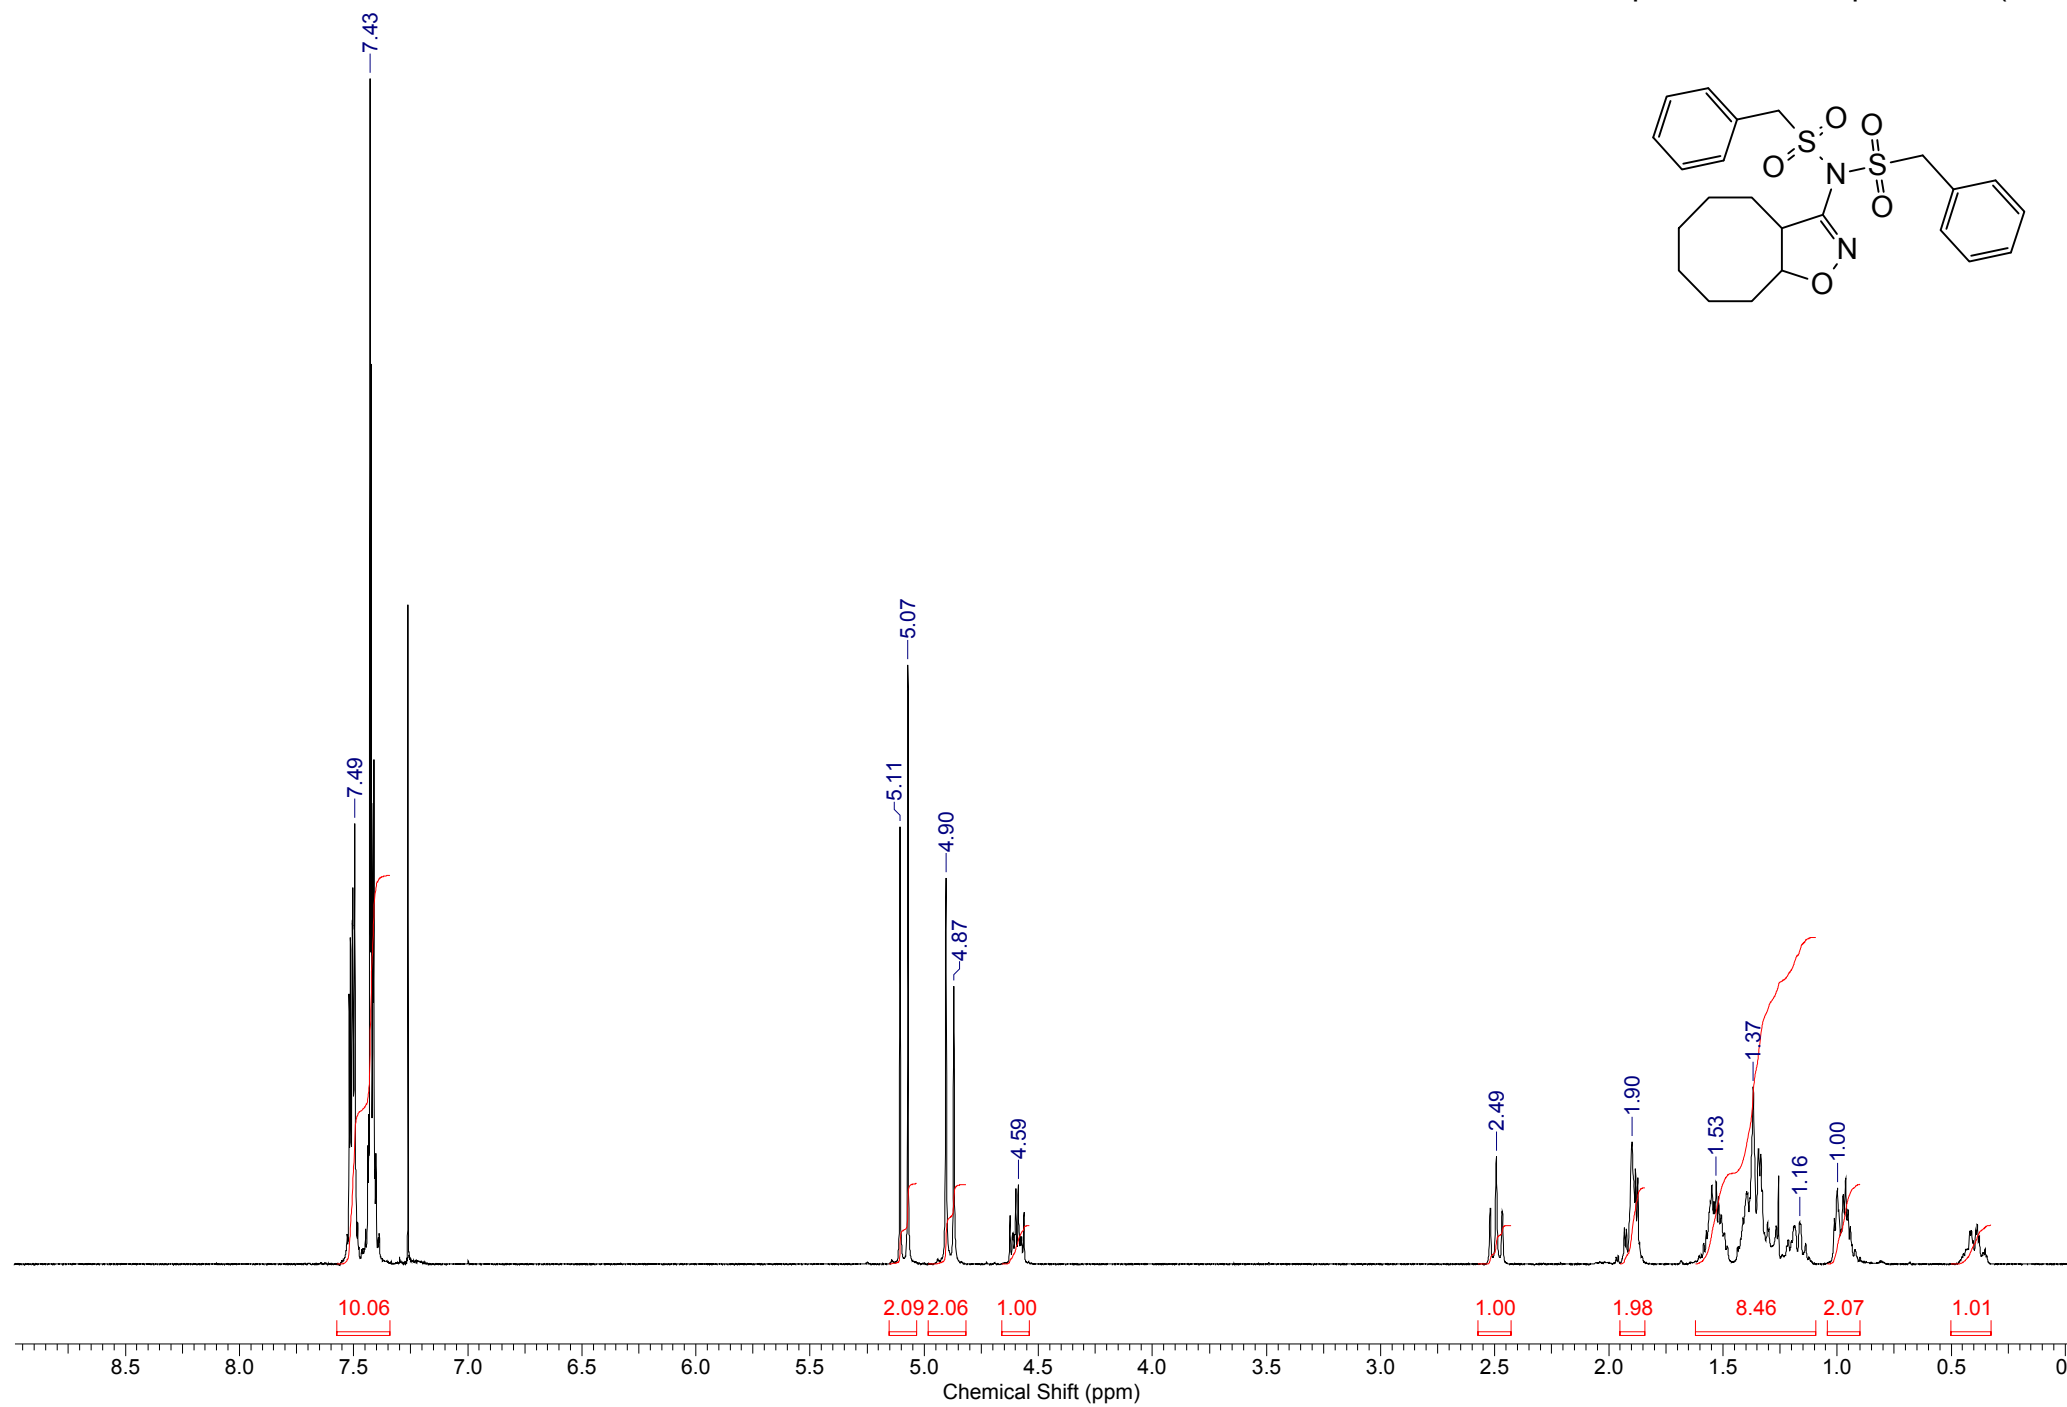

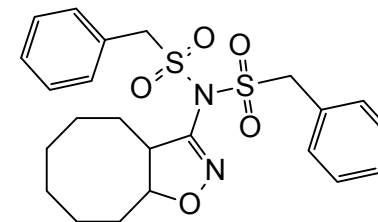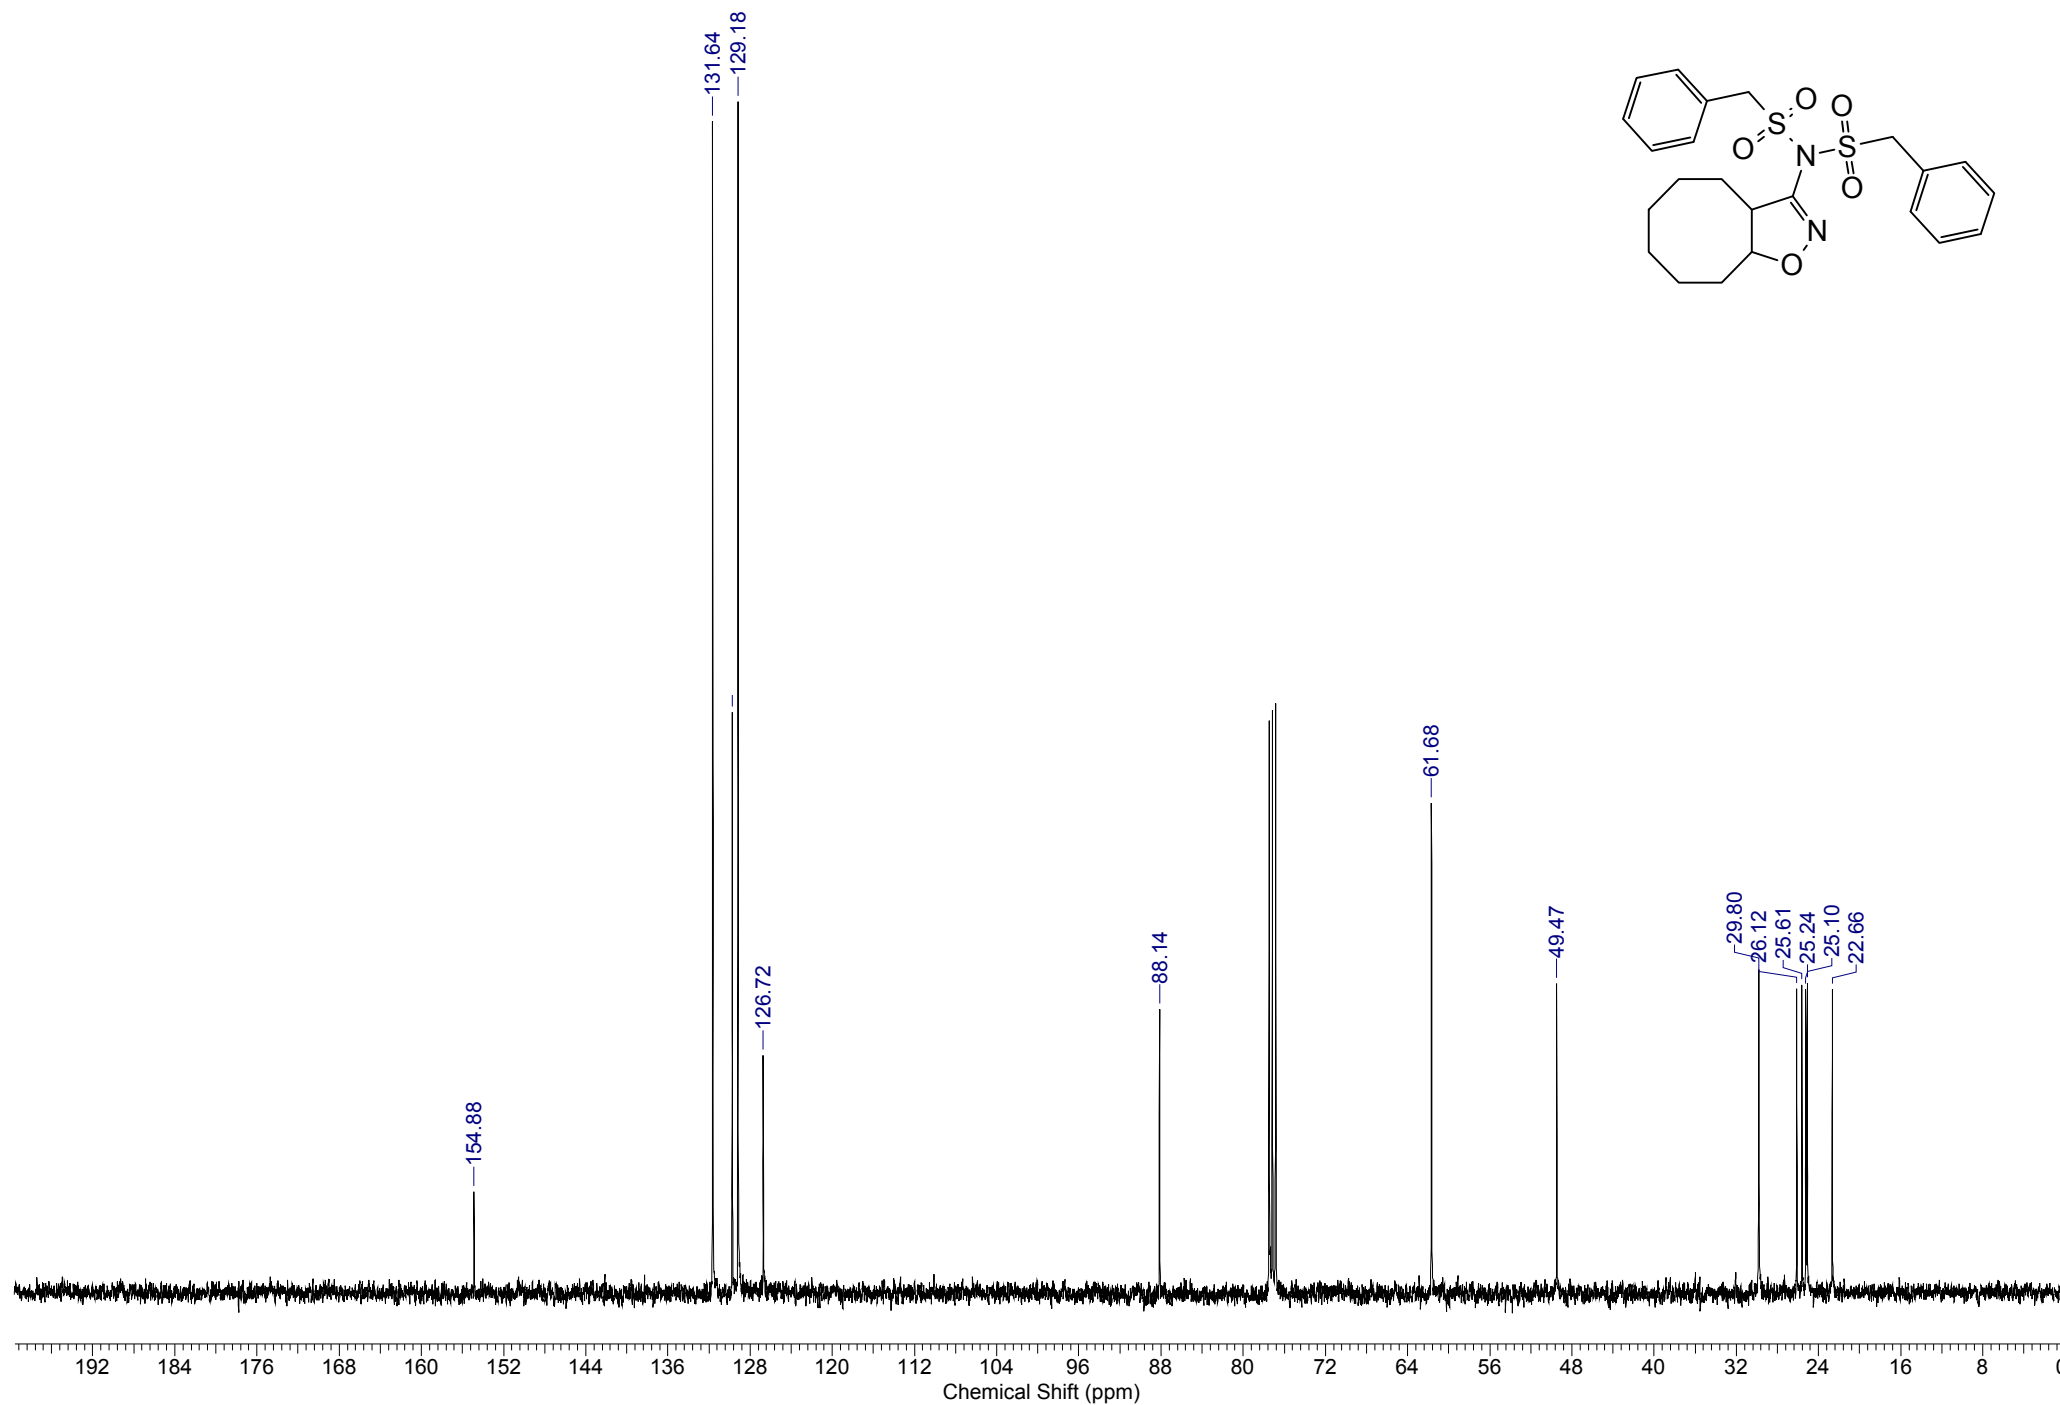

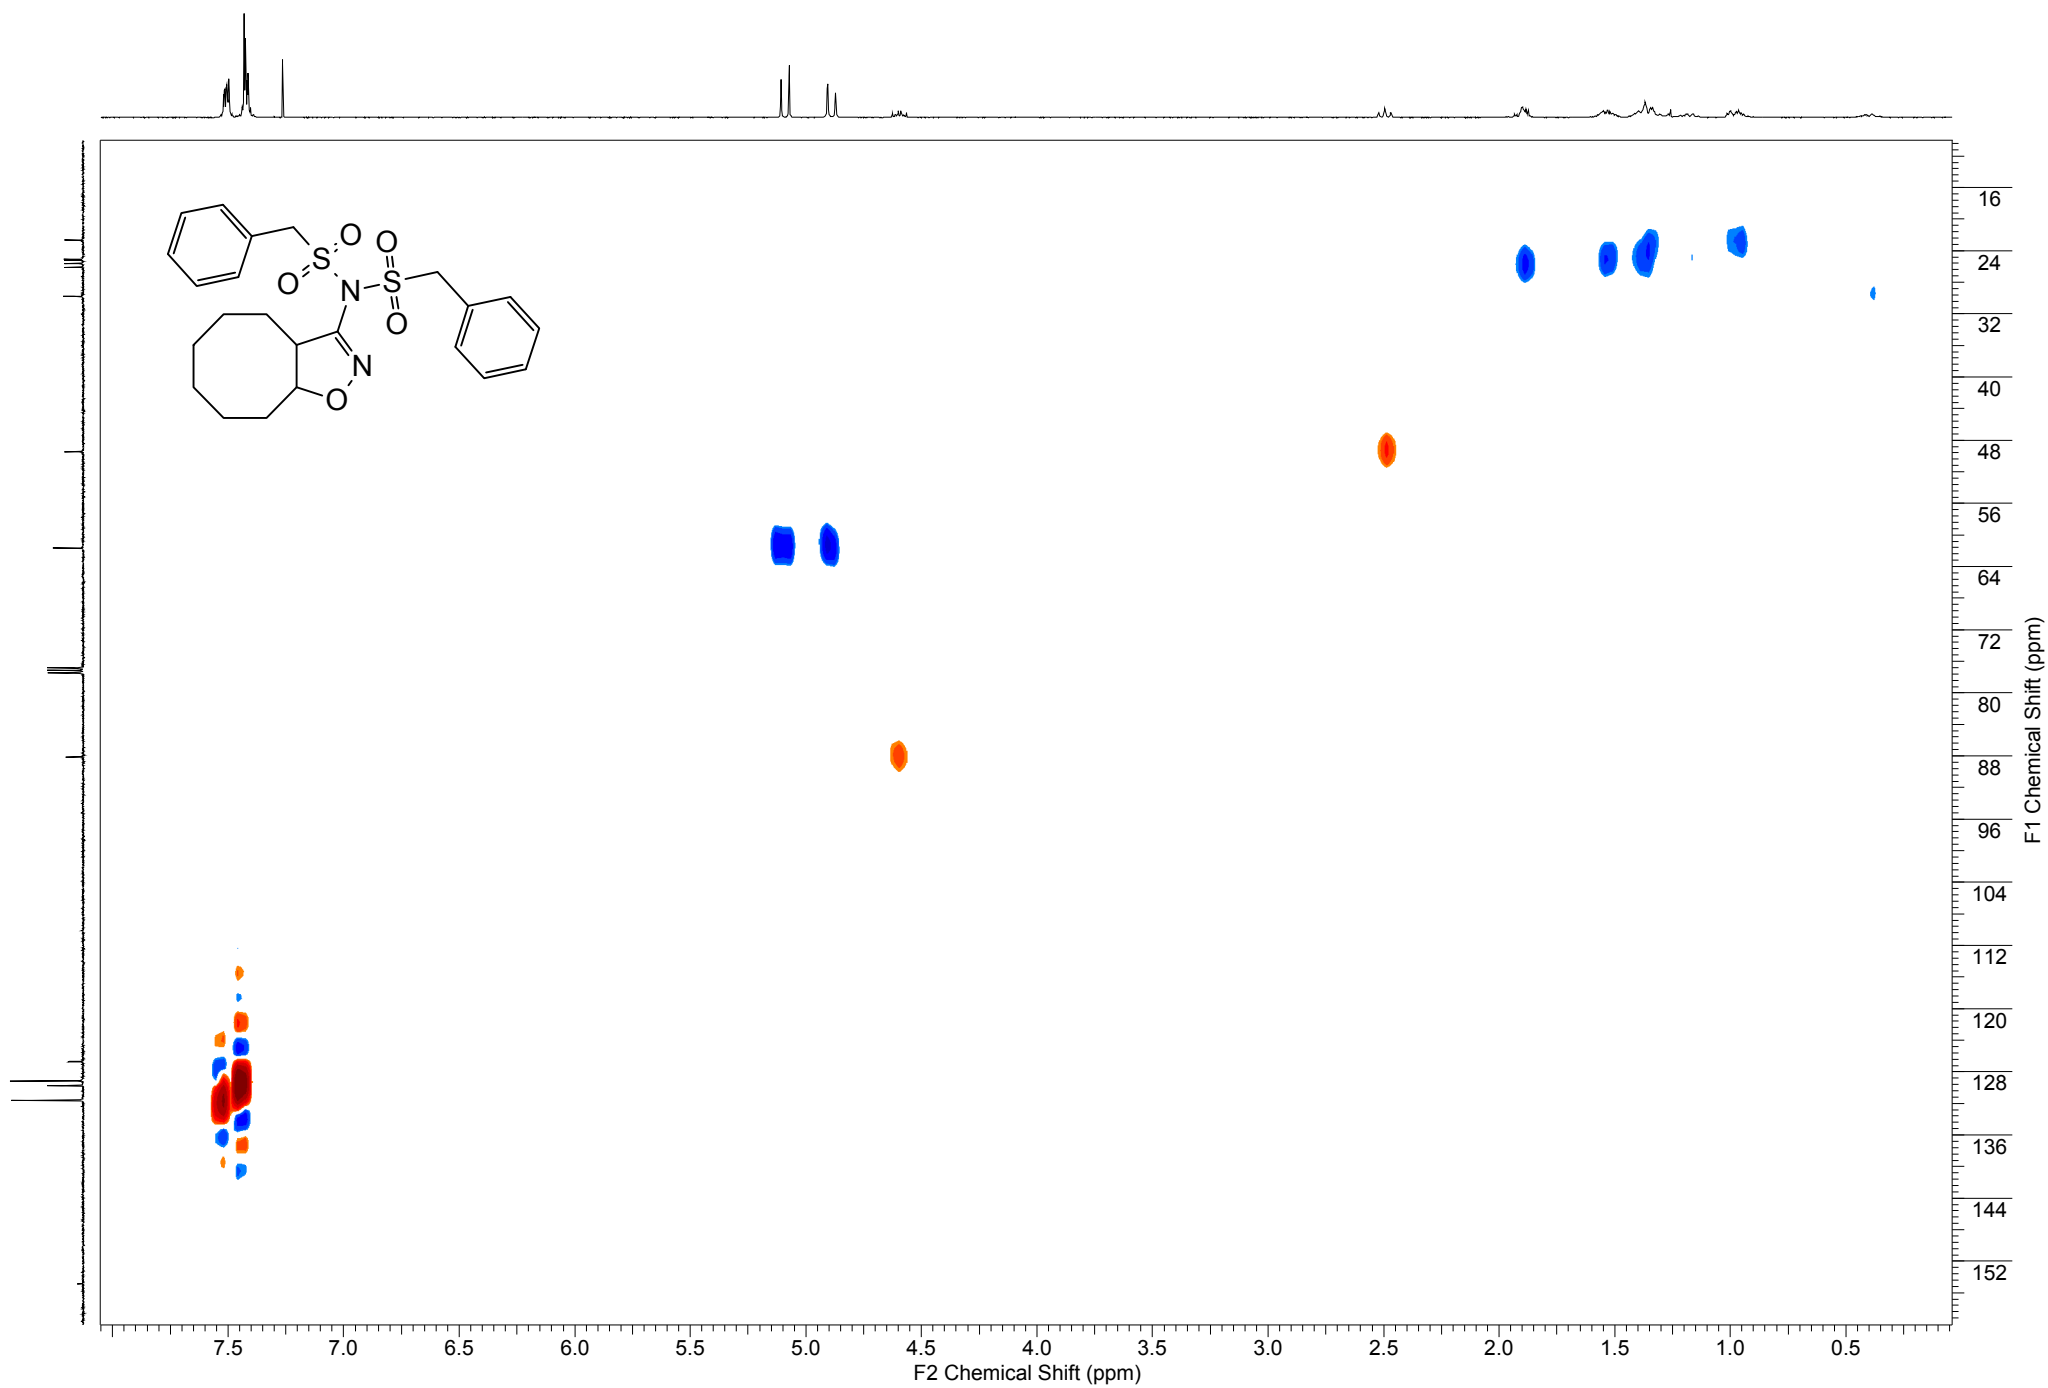

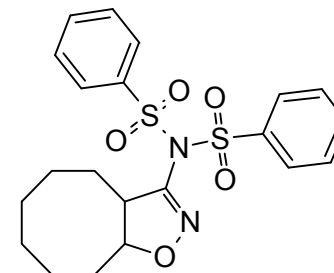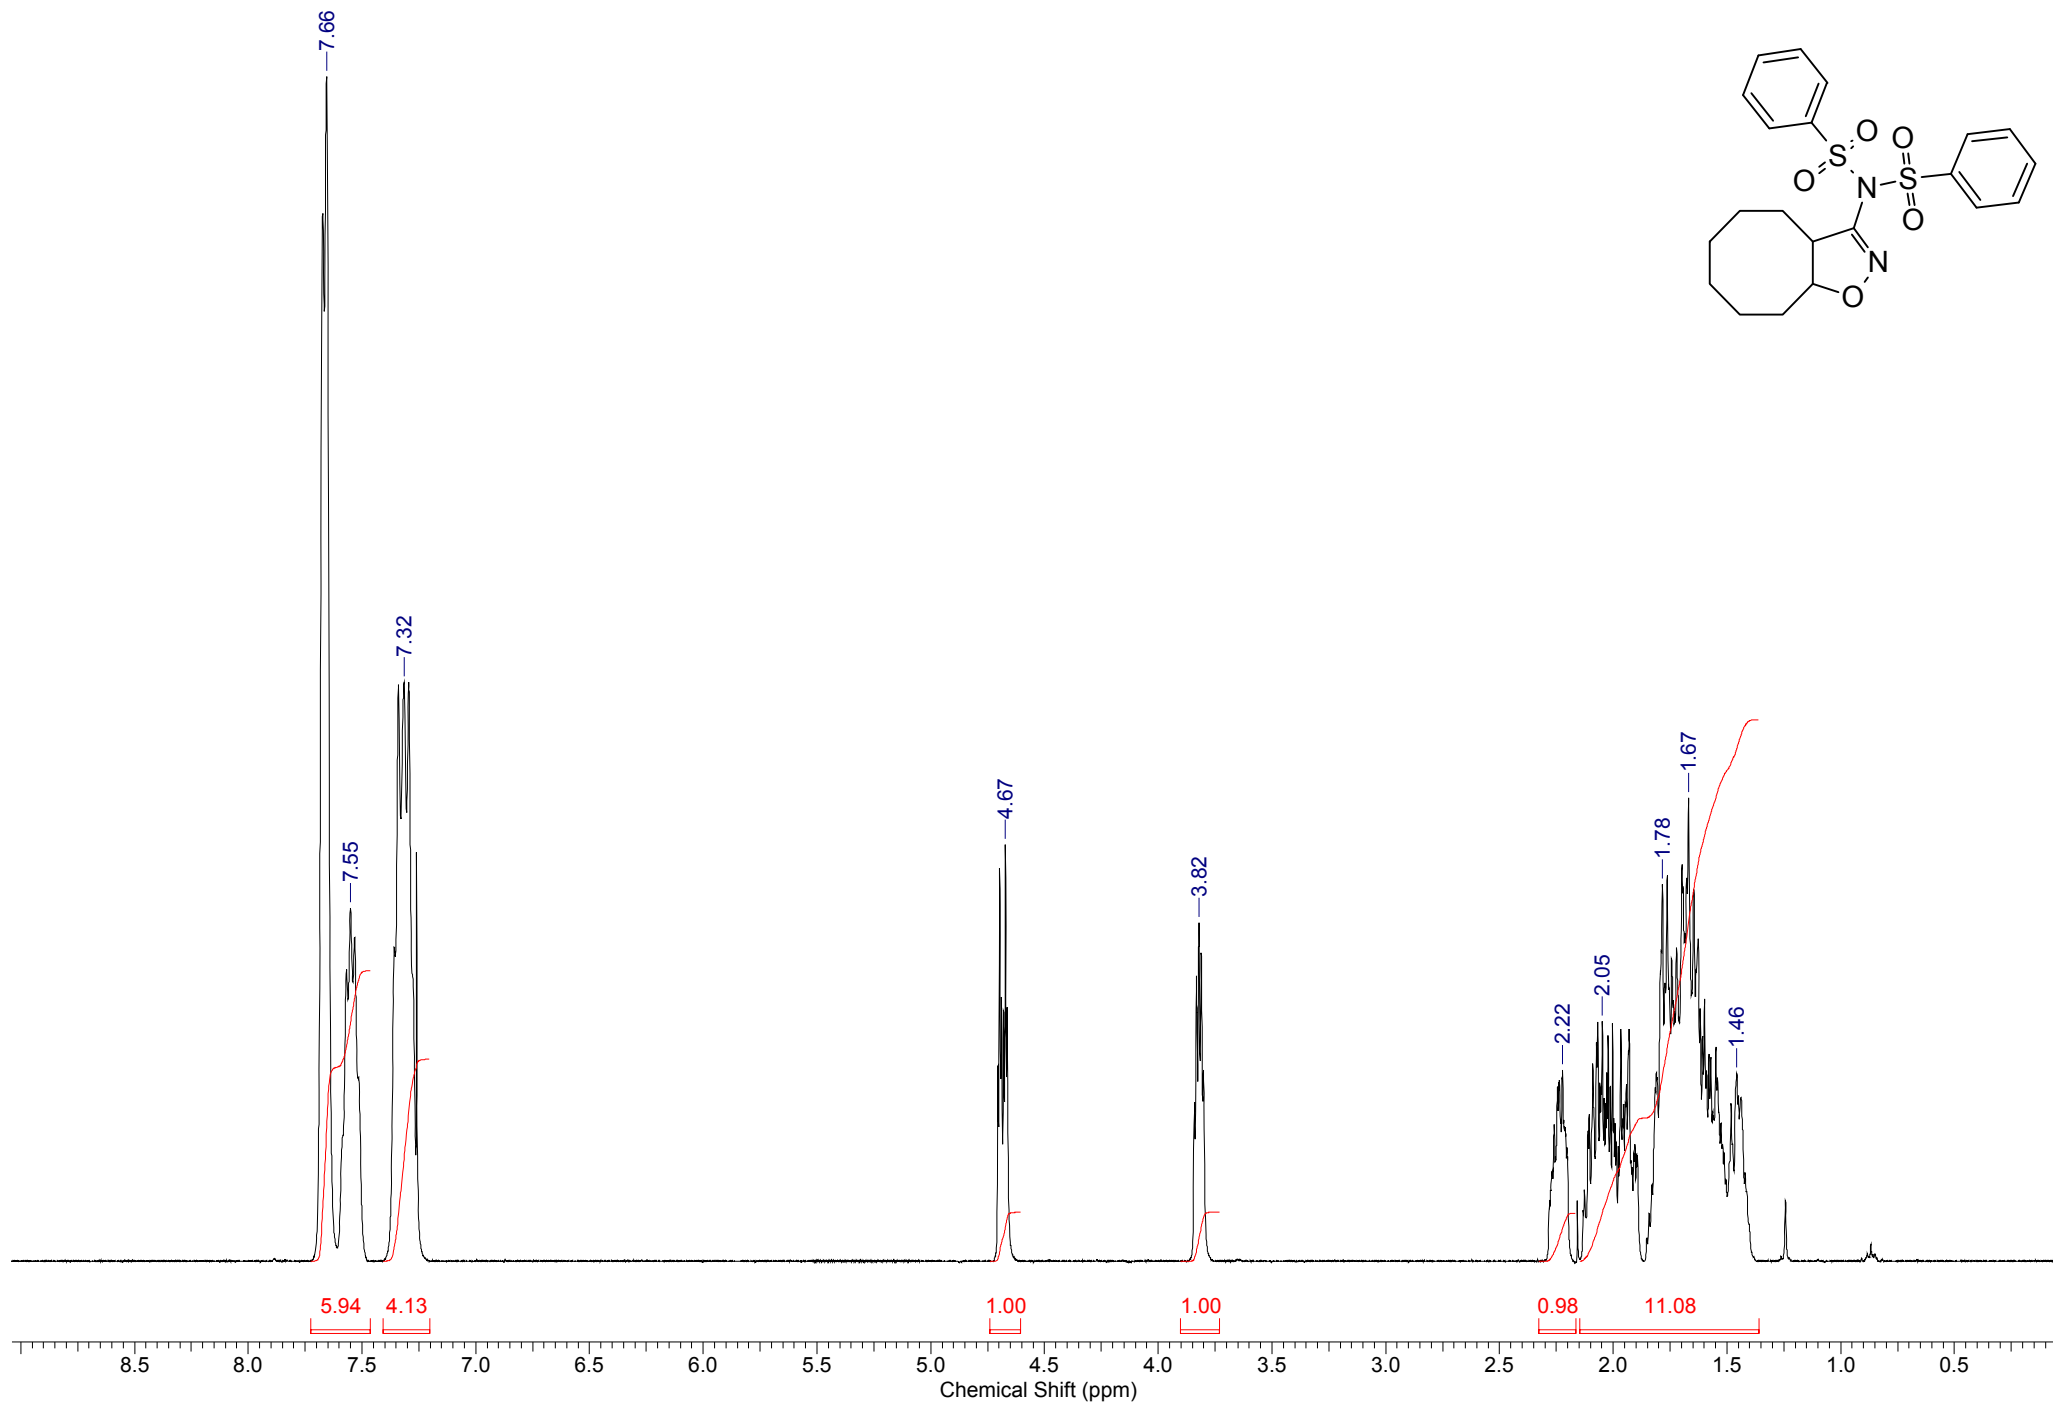

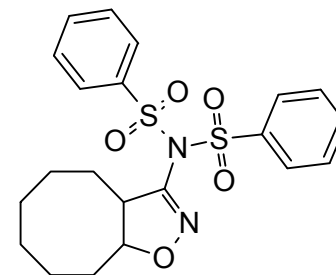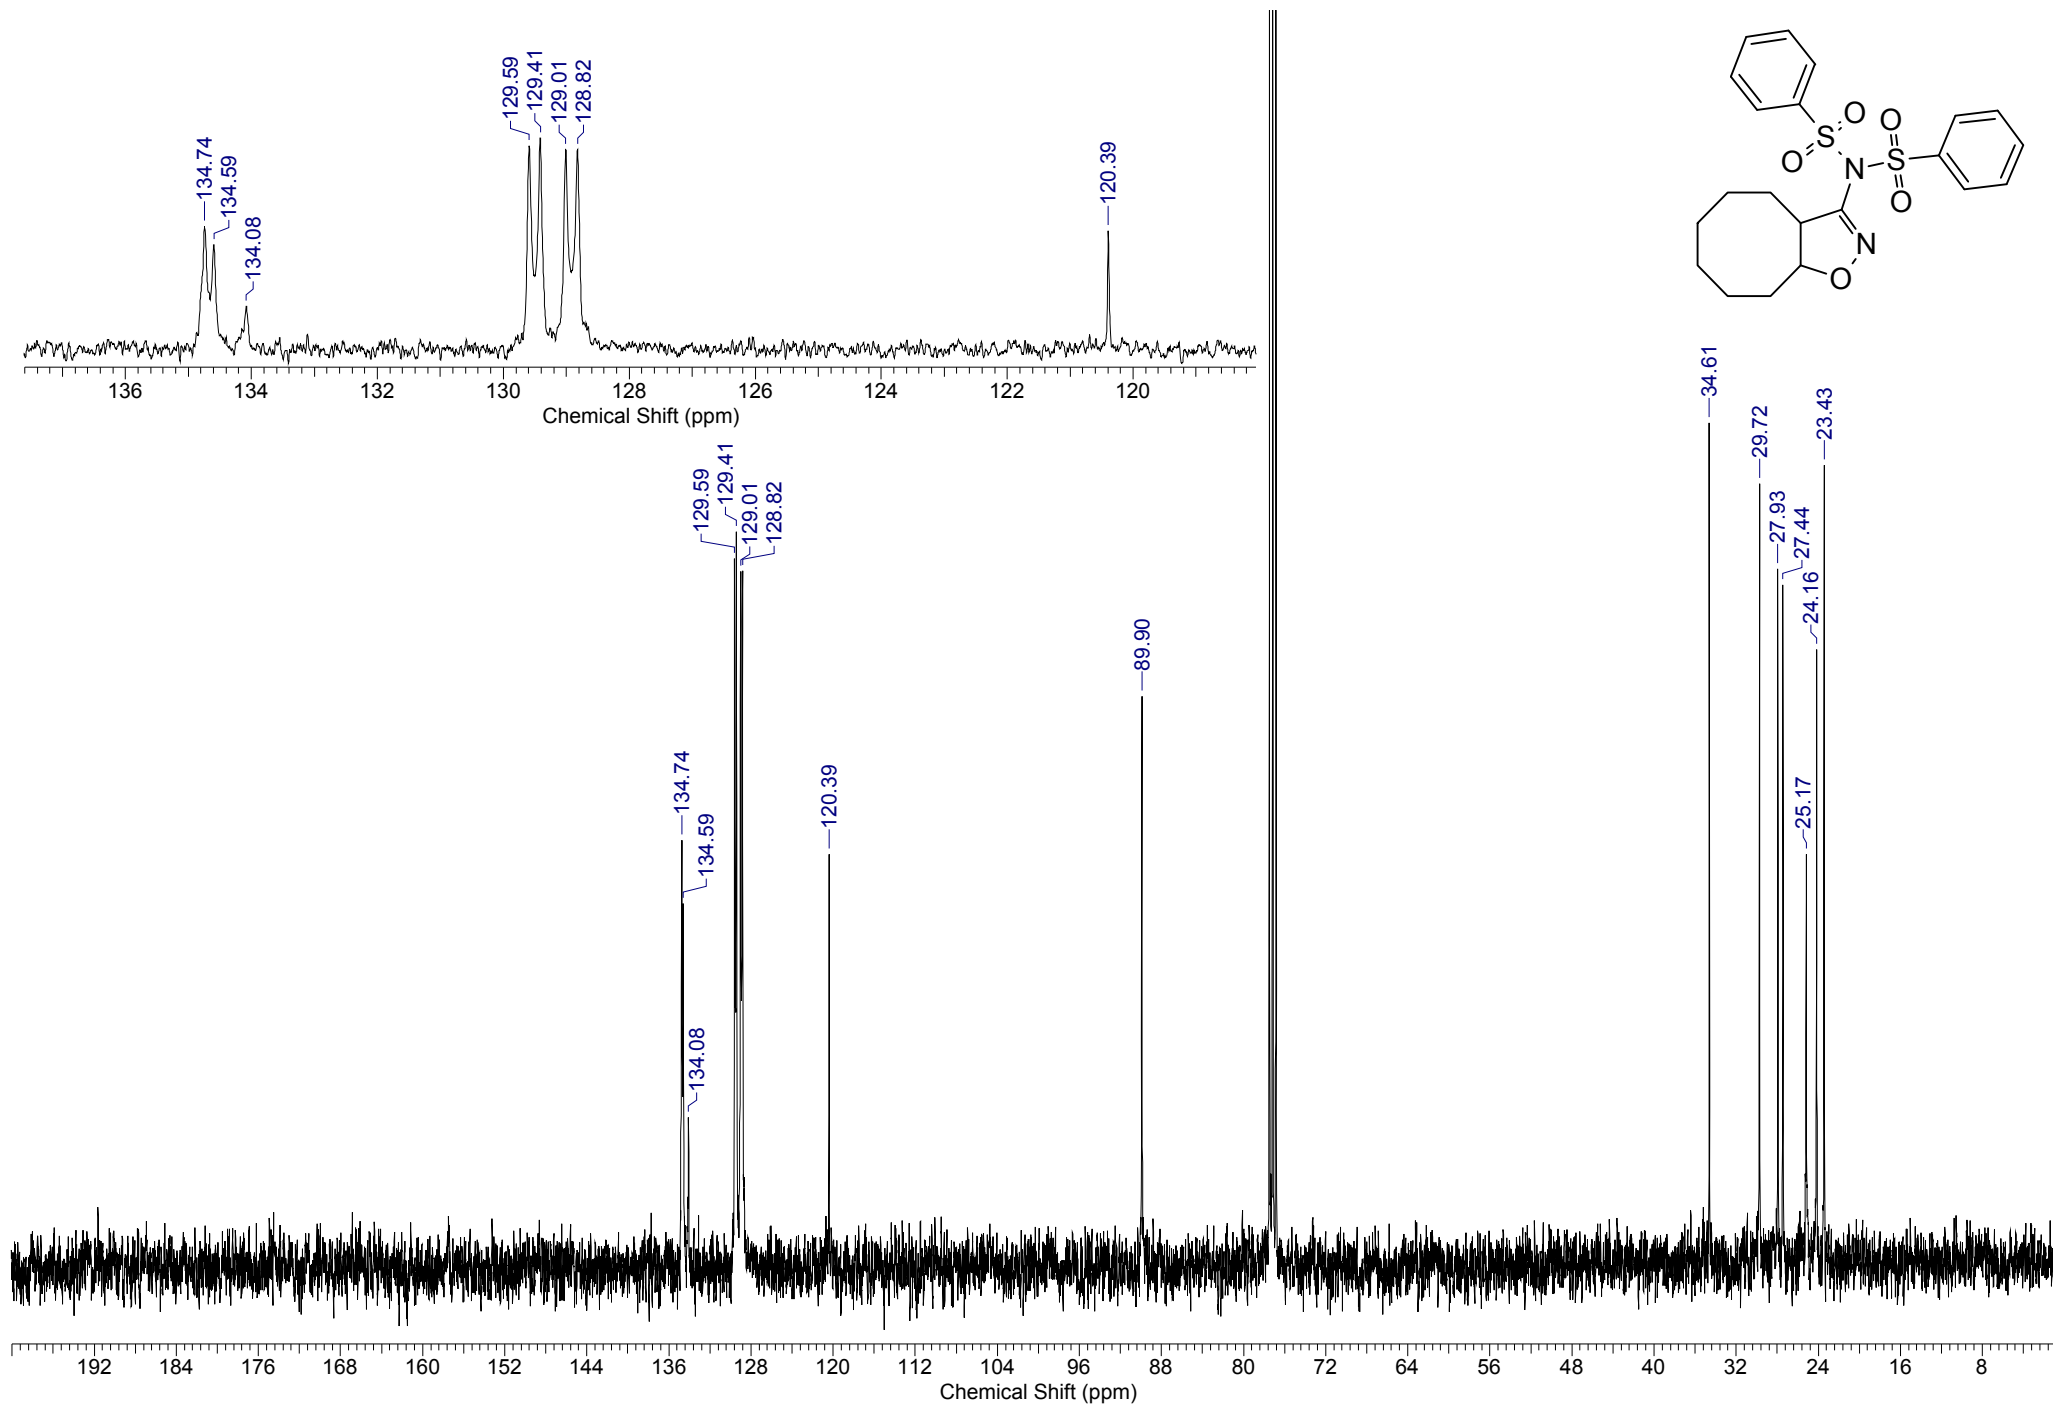

<sup>1</sup>H NMR spectrum of compound **5d** (CDCl<sub>3</sub>)

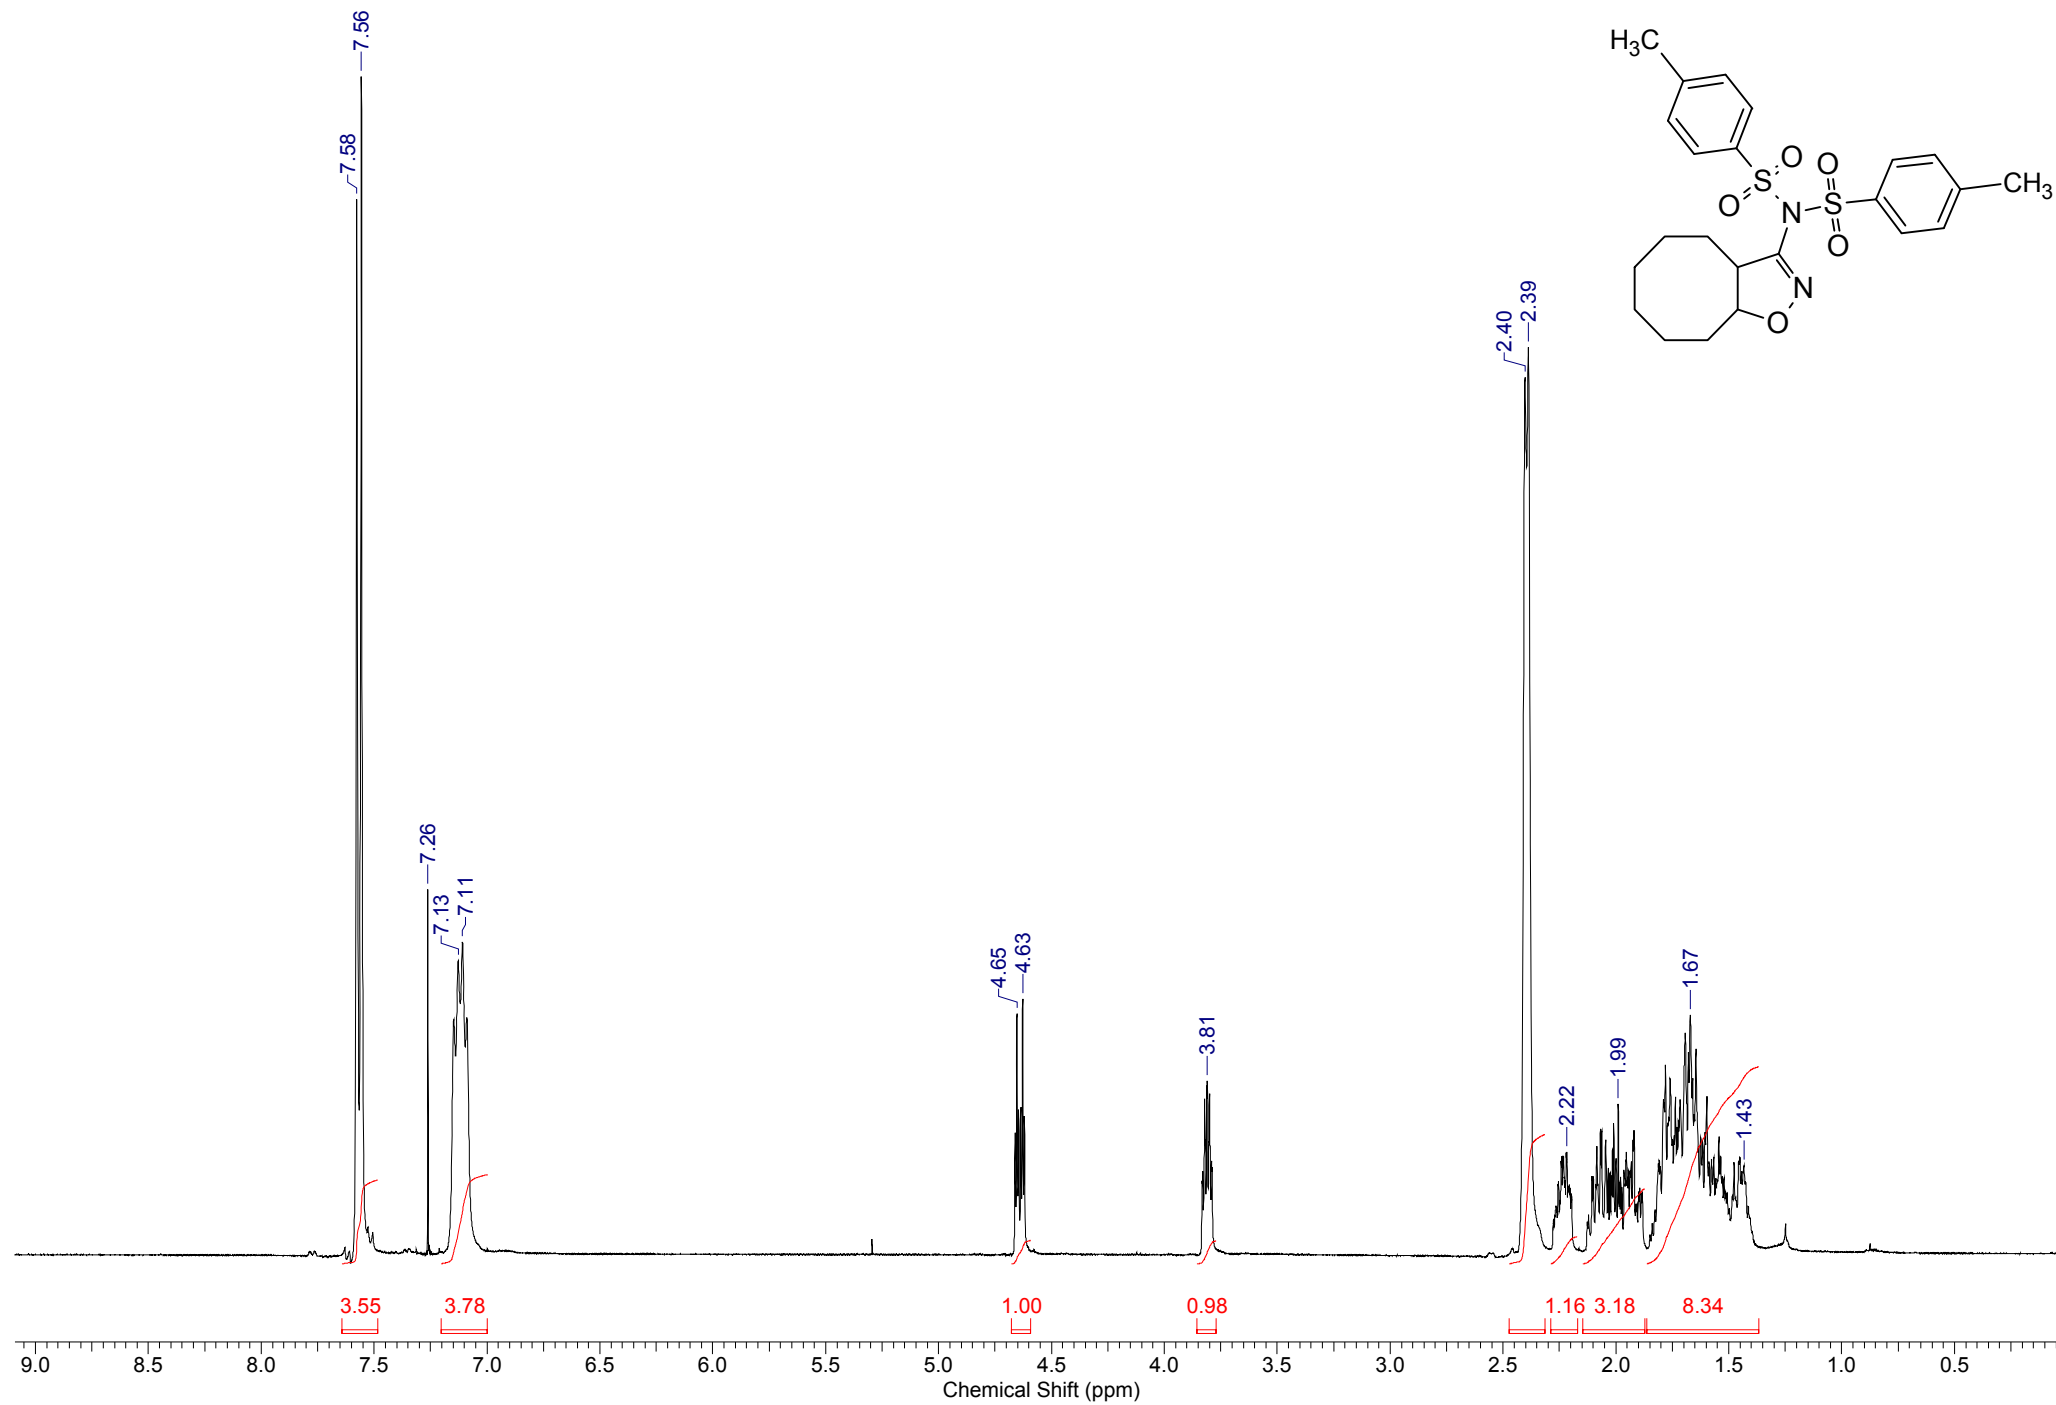

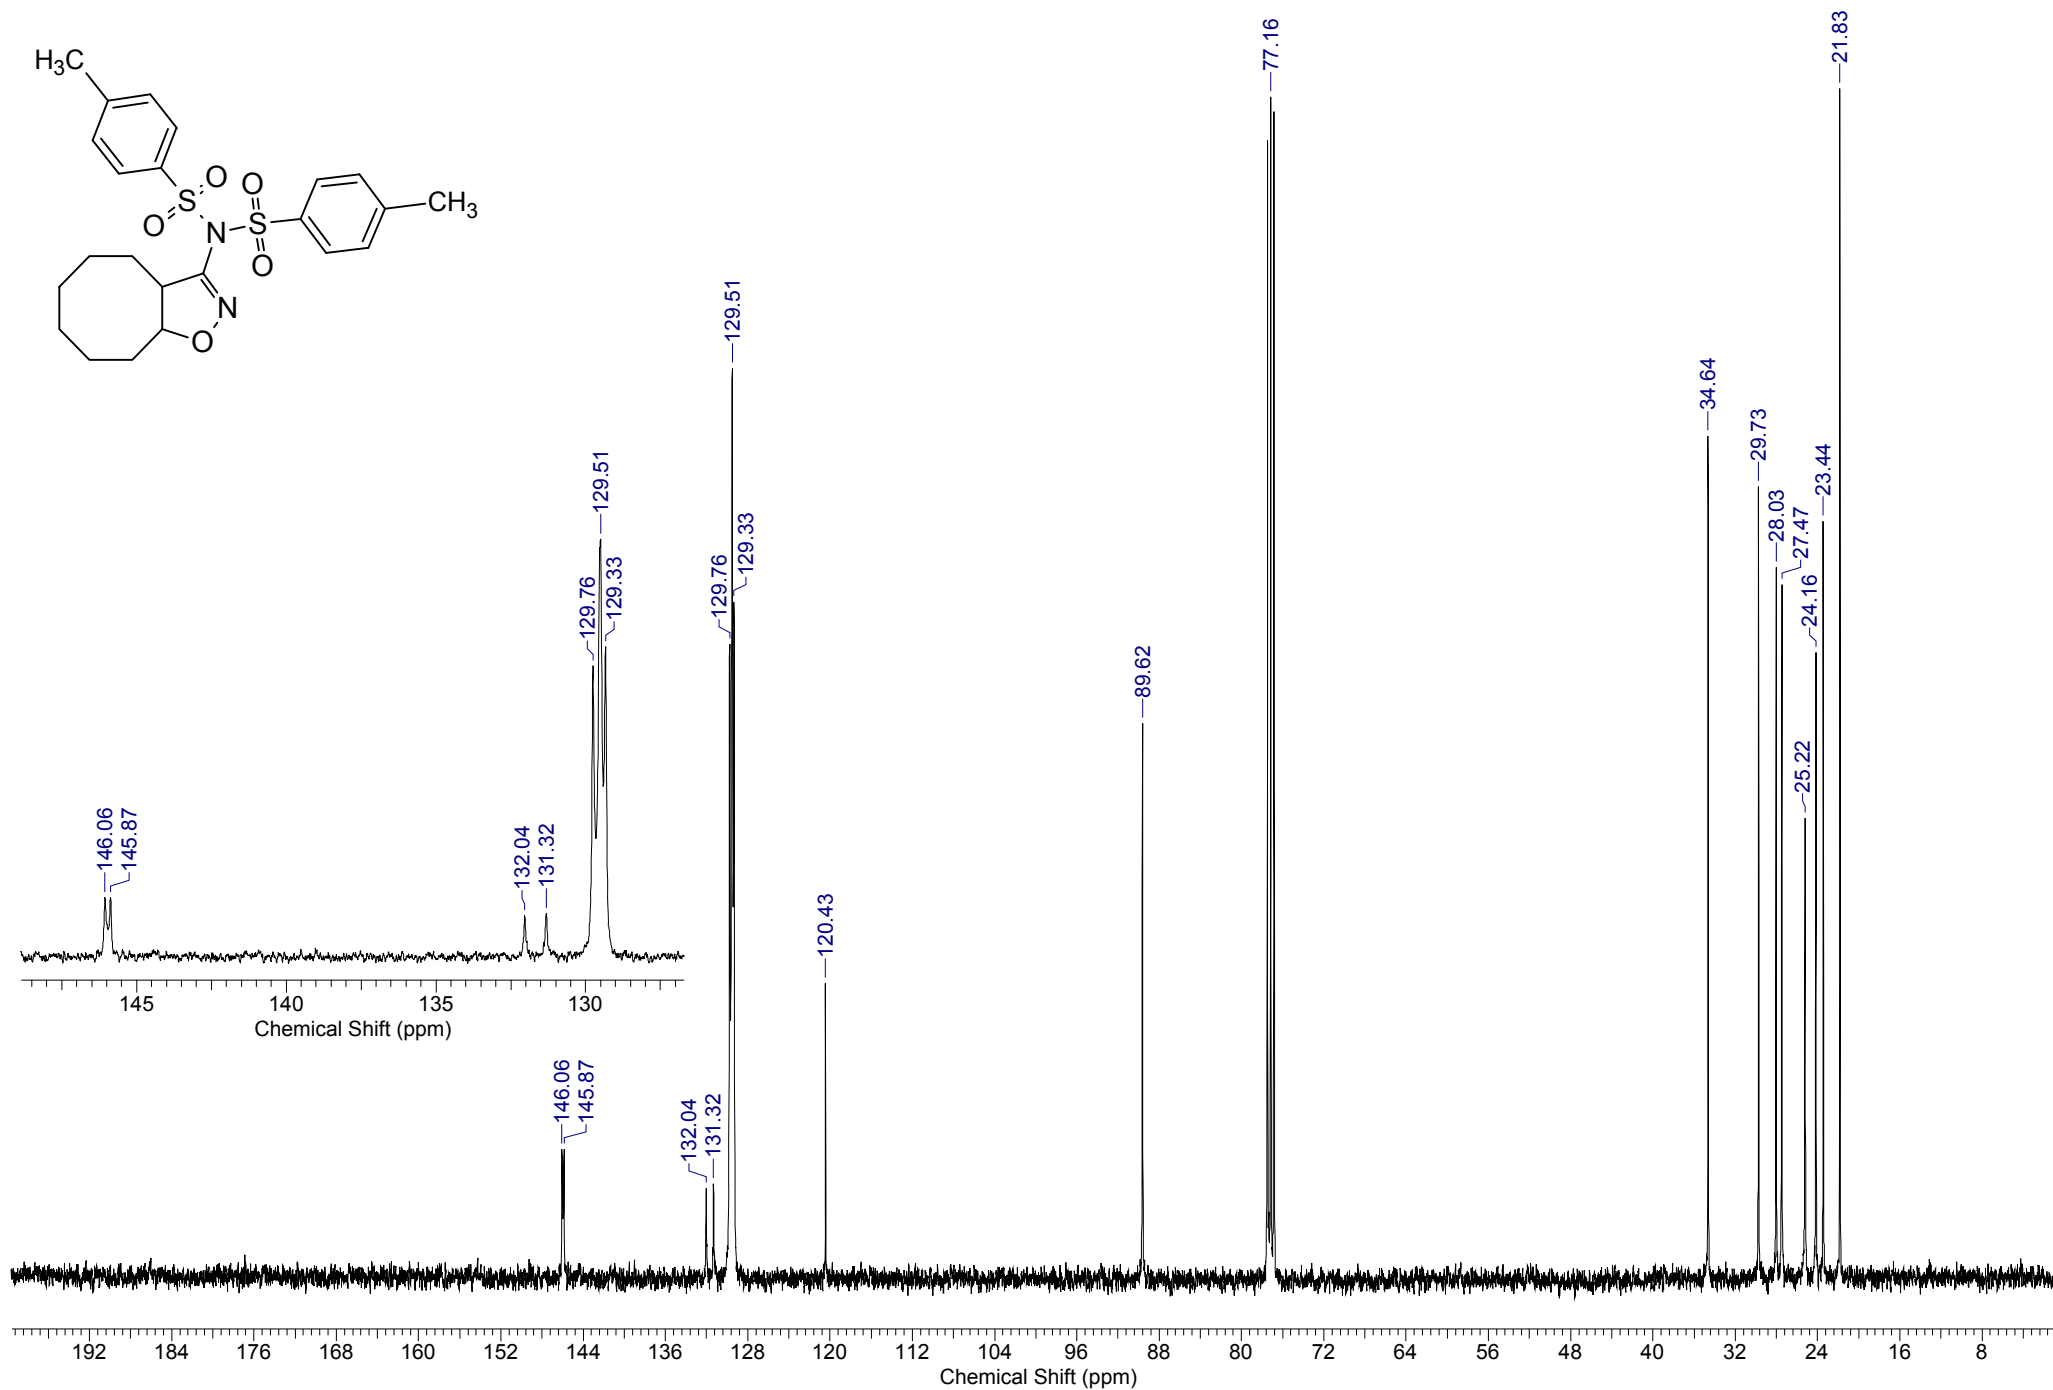



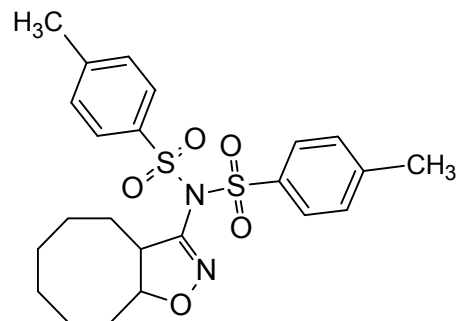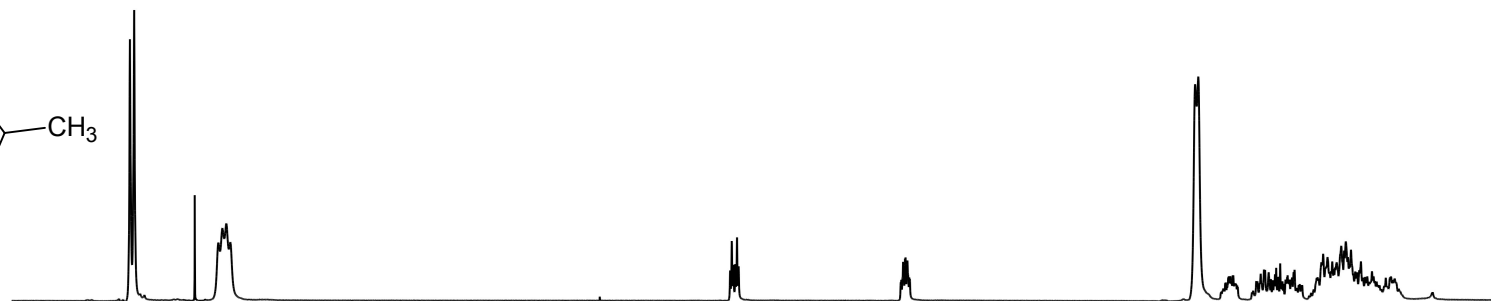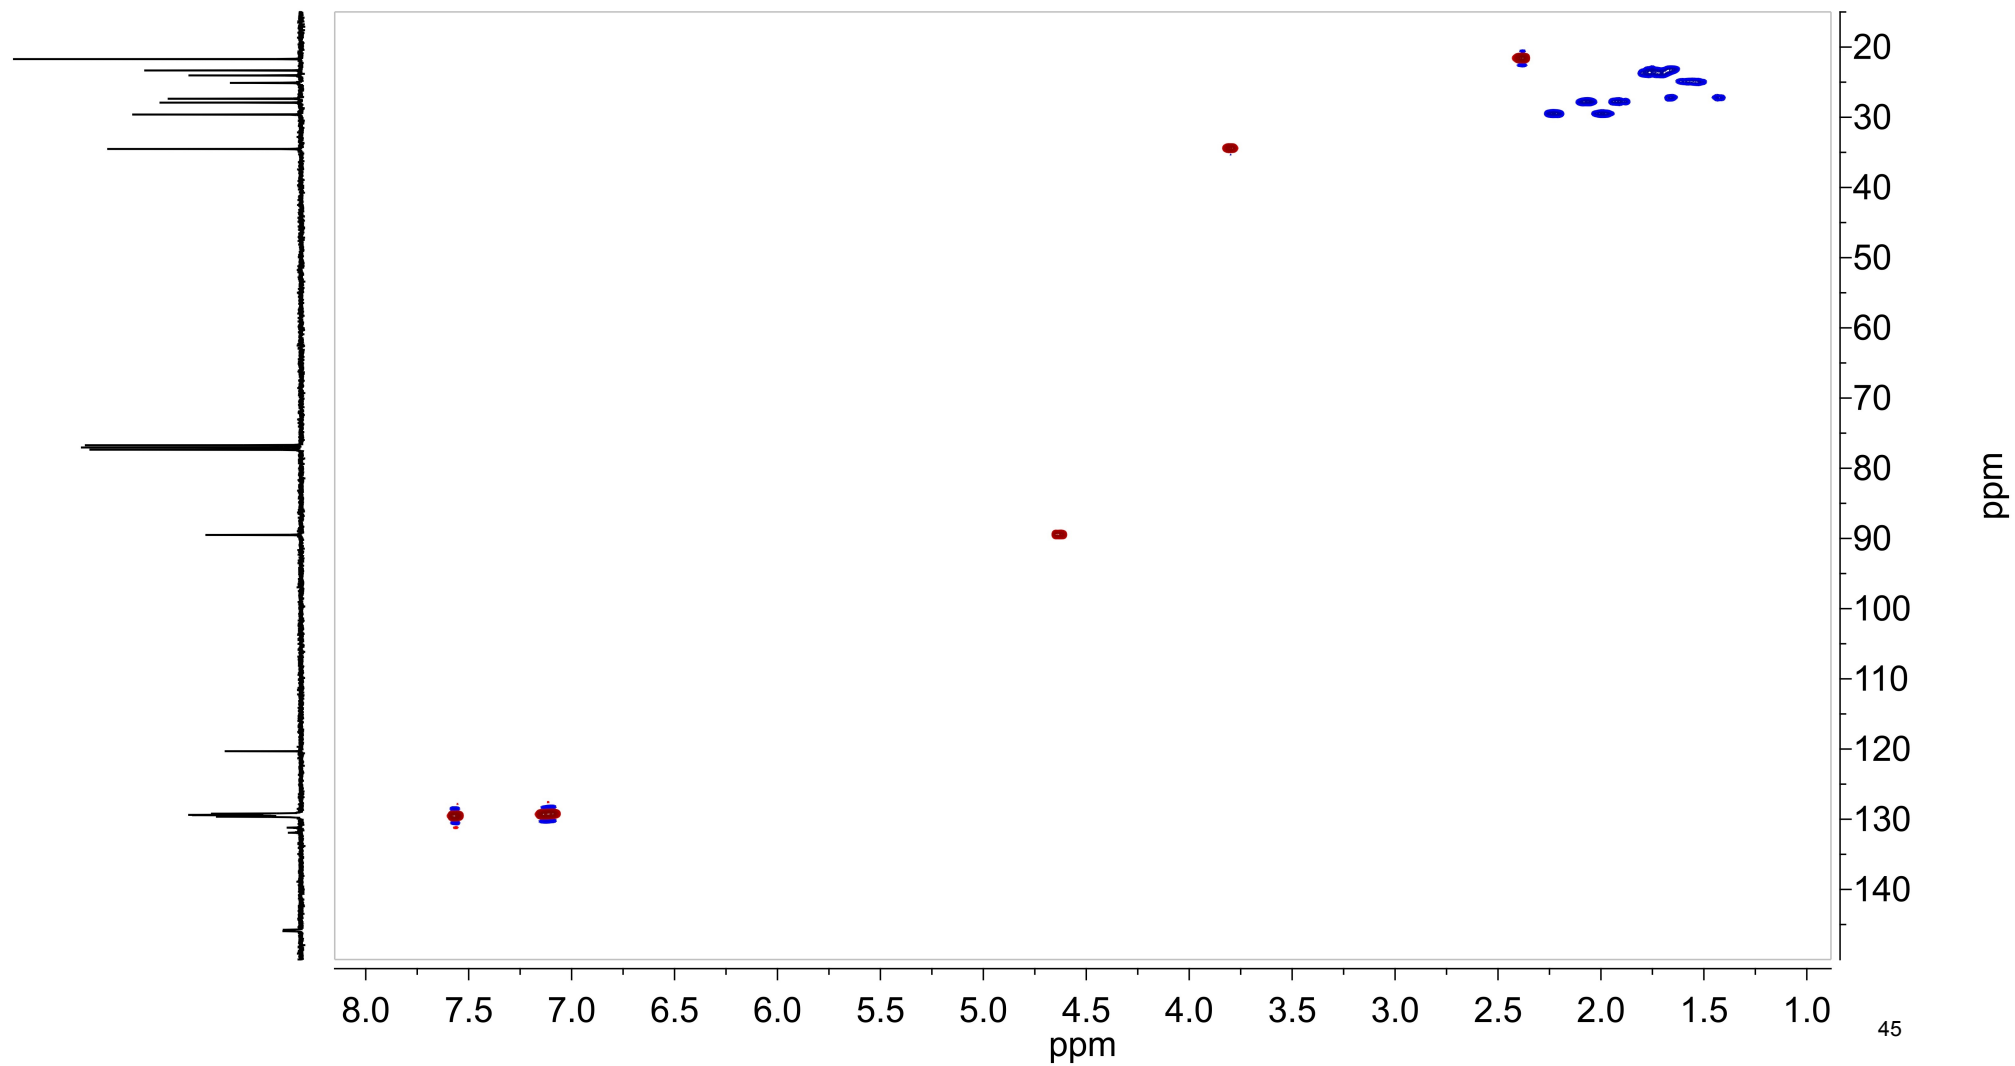

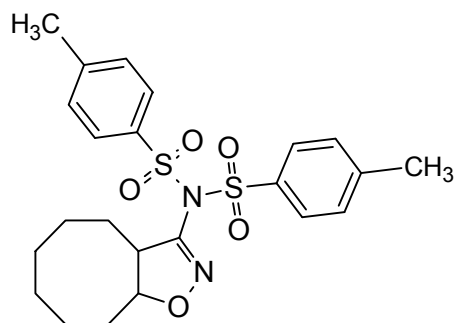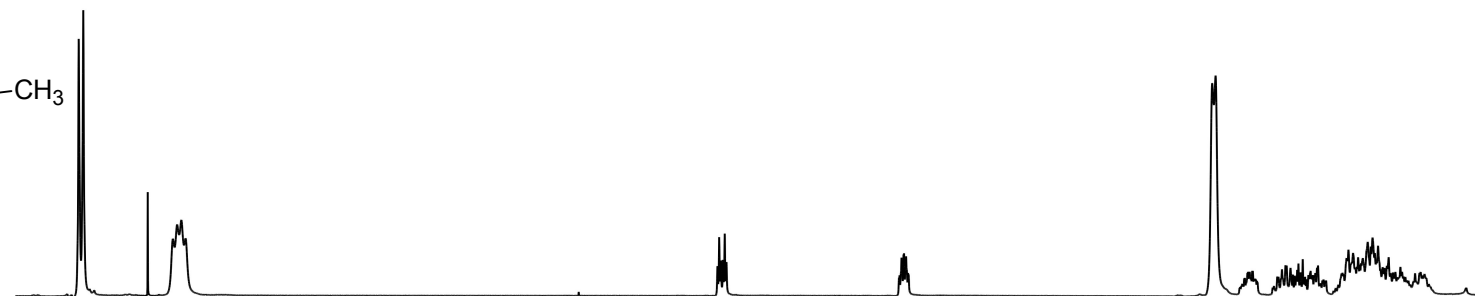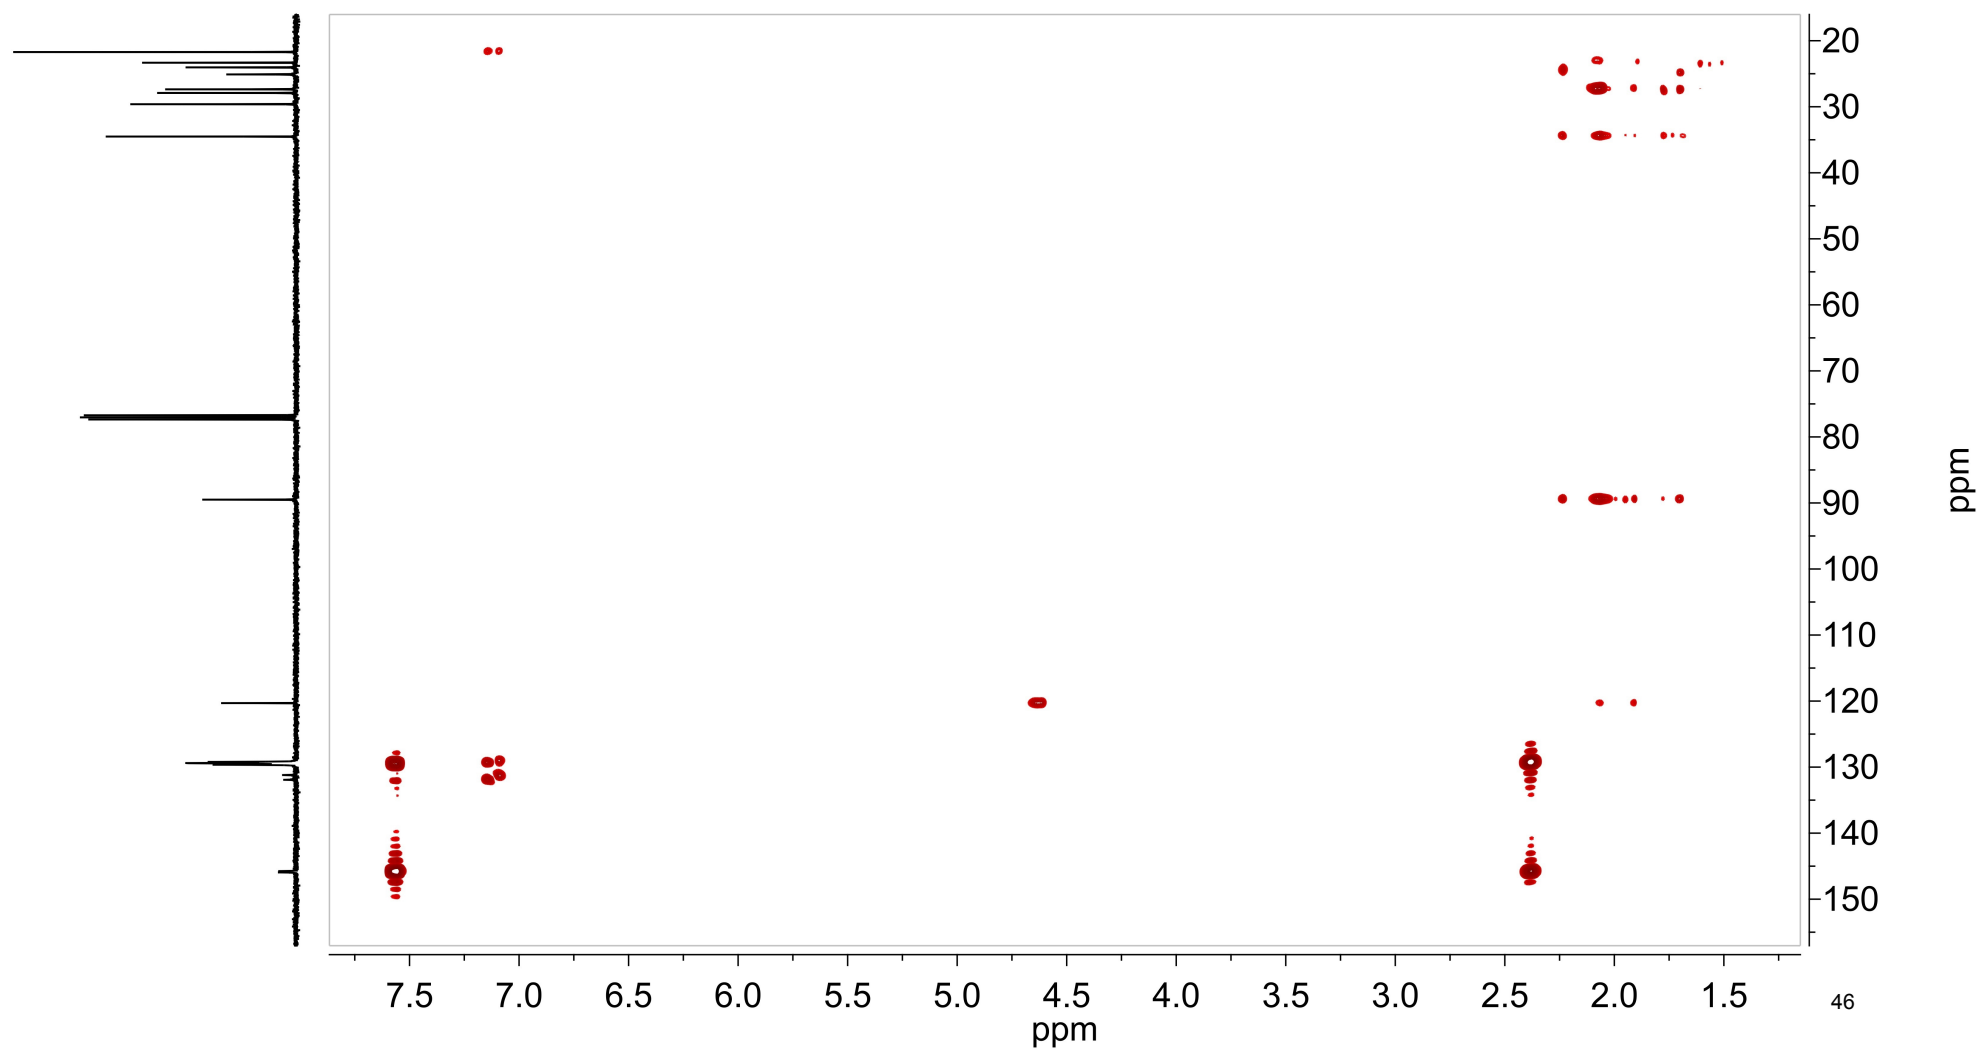

<sup>1</sup>H NMR spectrum of compound **5e** (CDCl<sub>3</sub>)

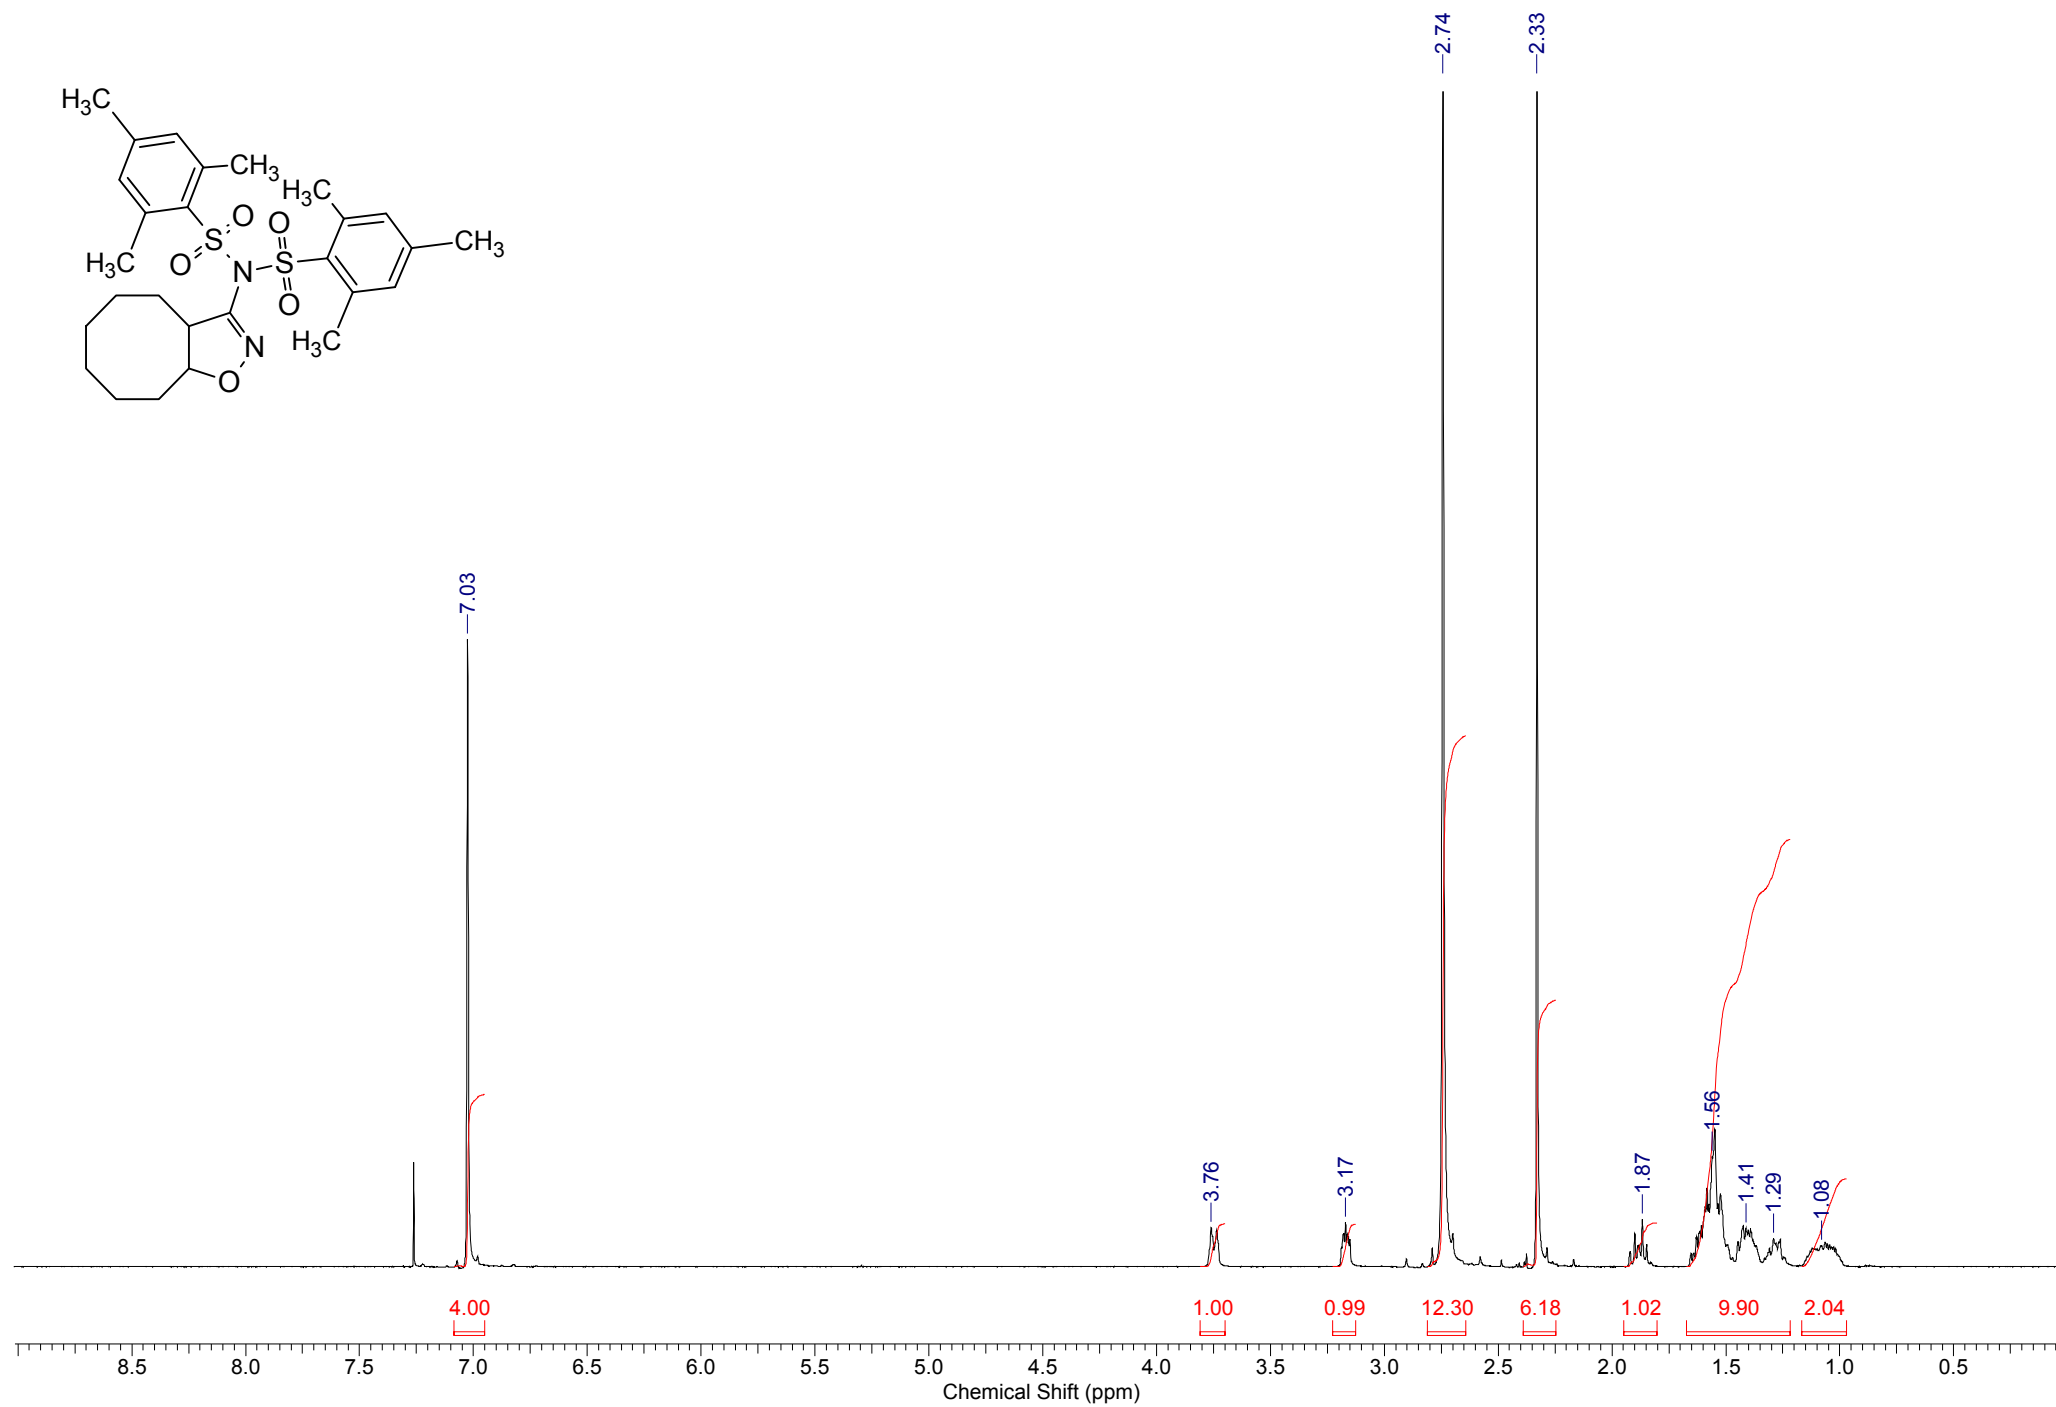

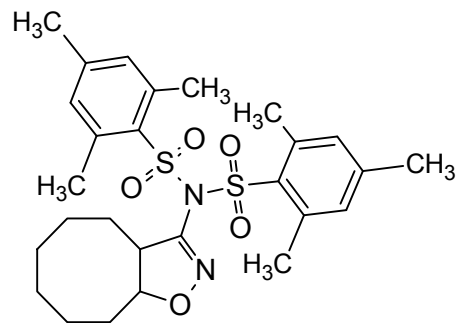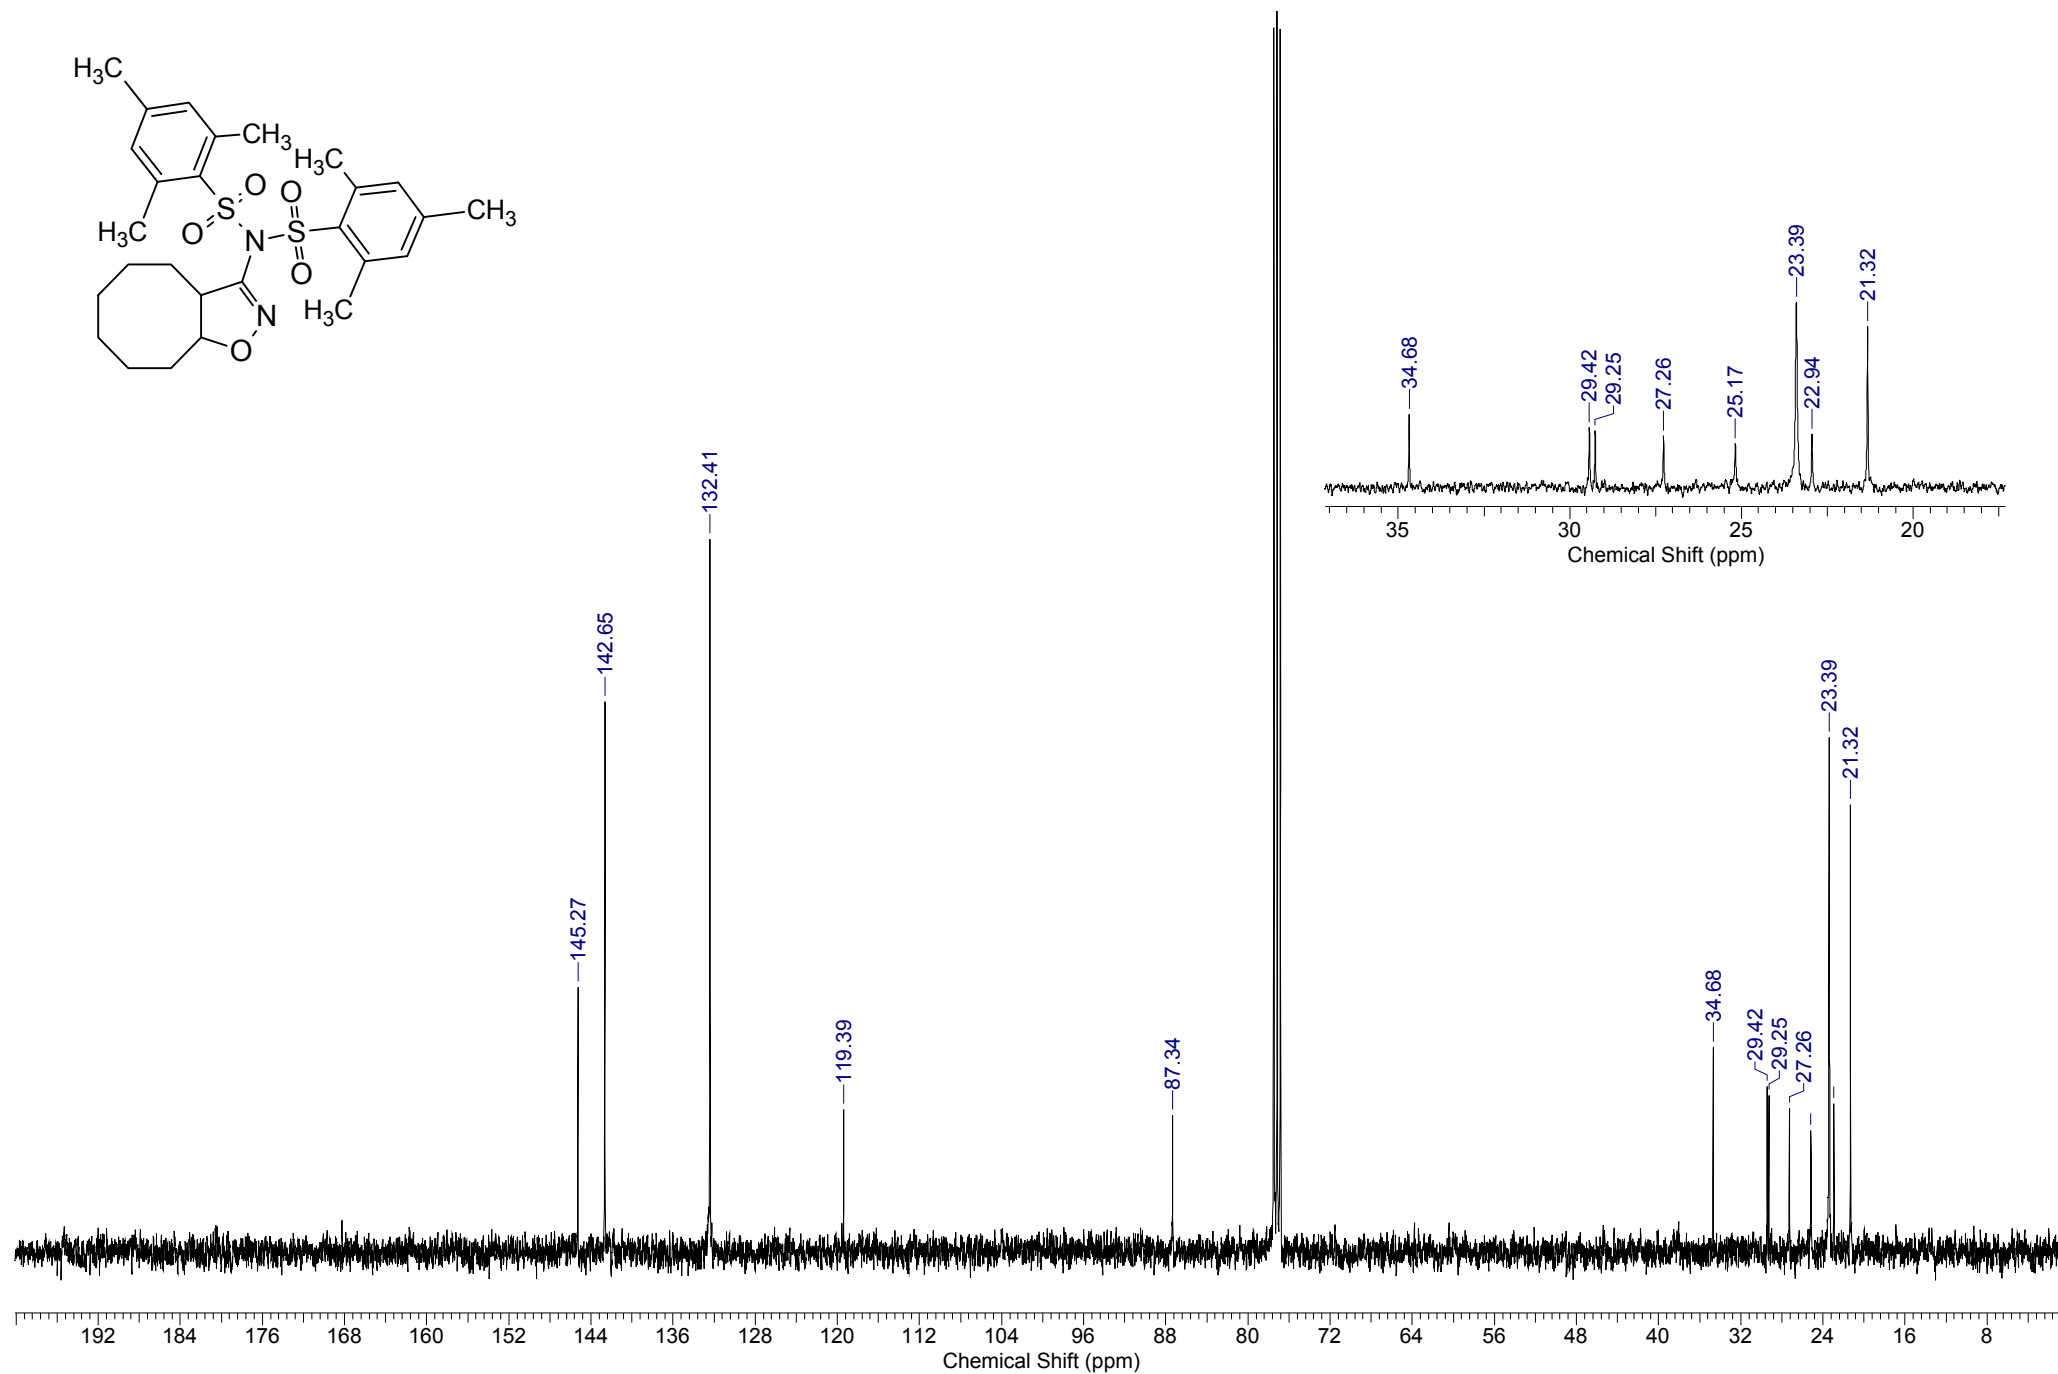

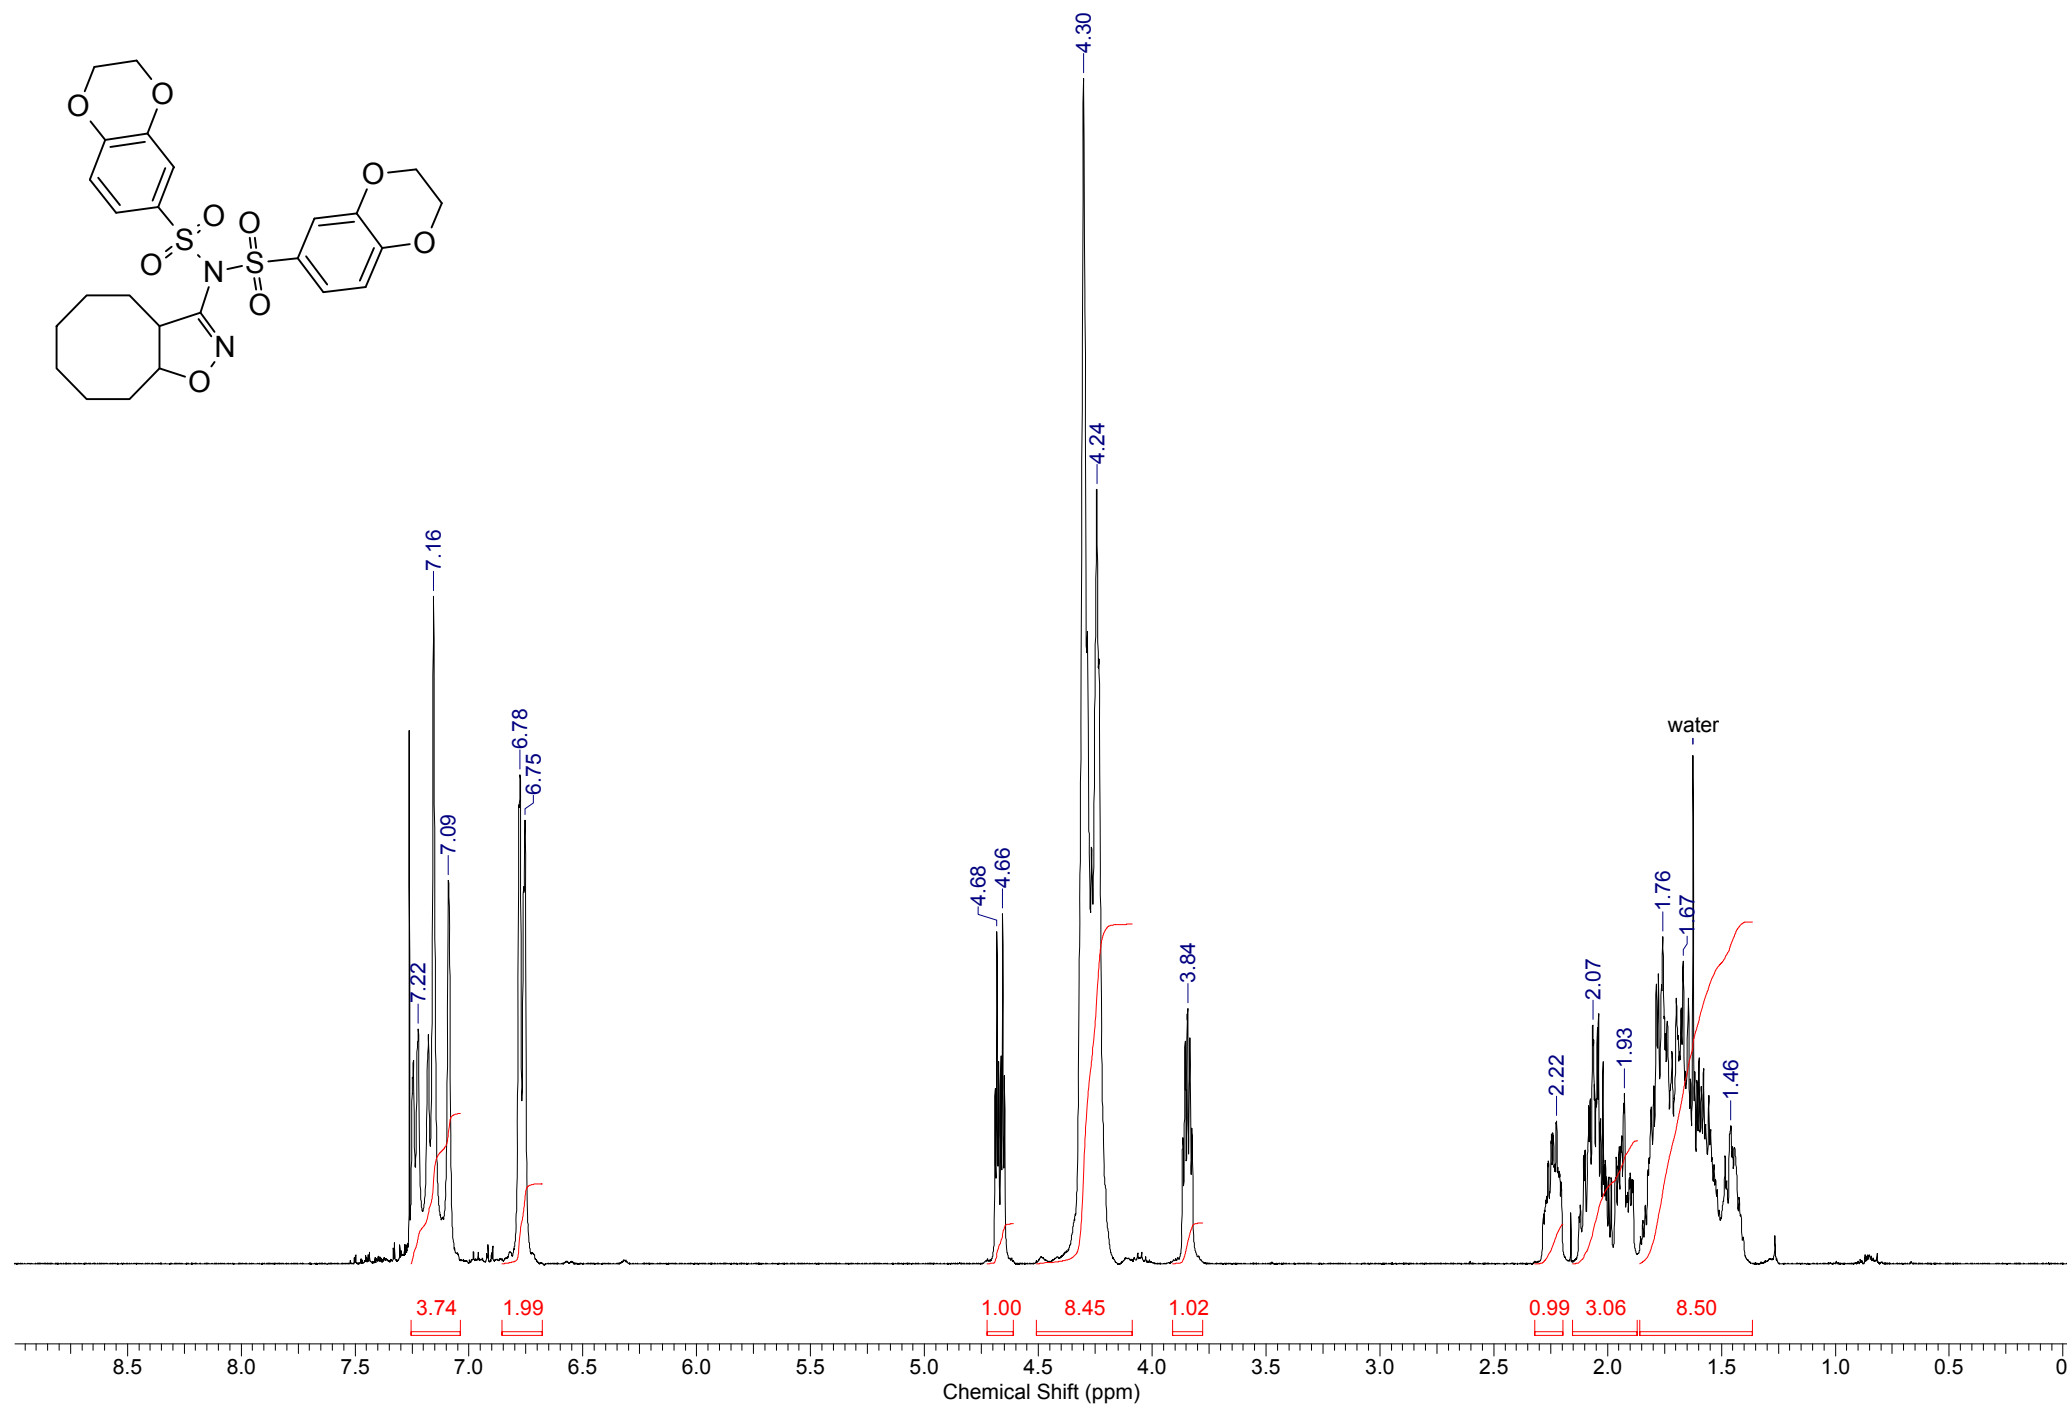

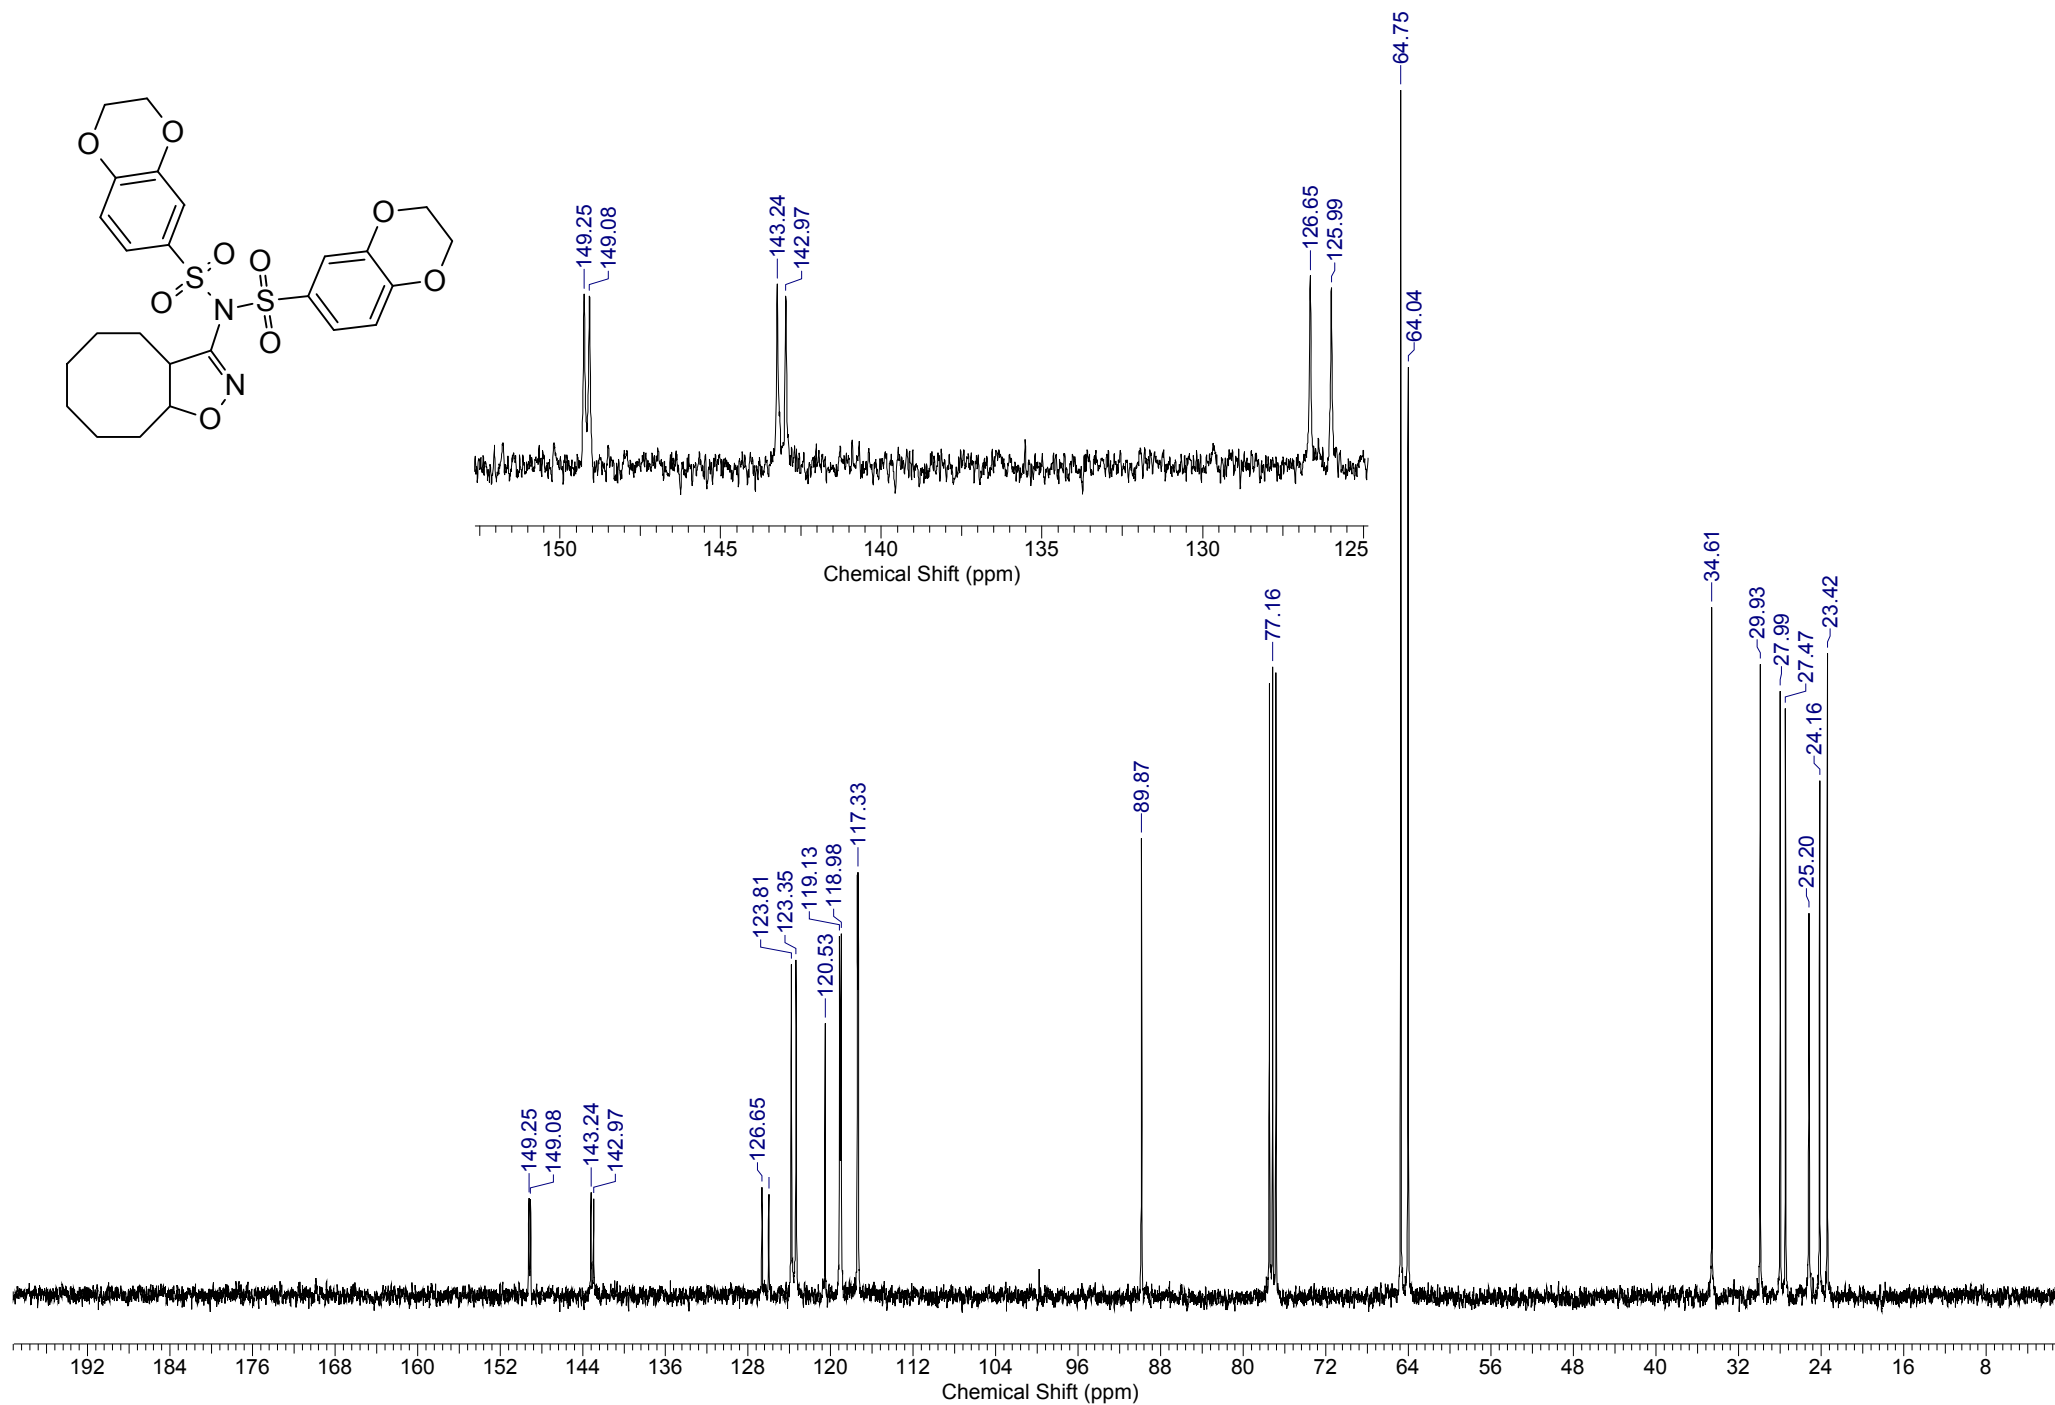

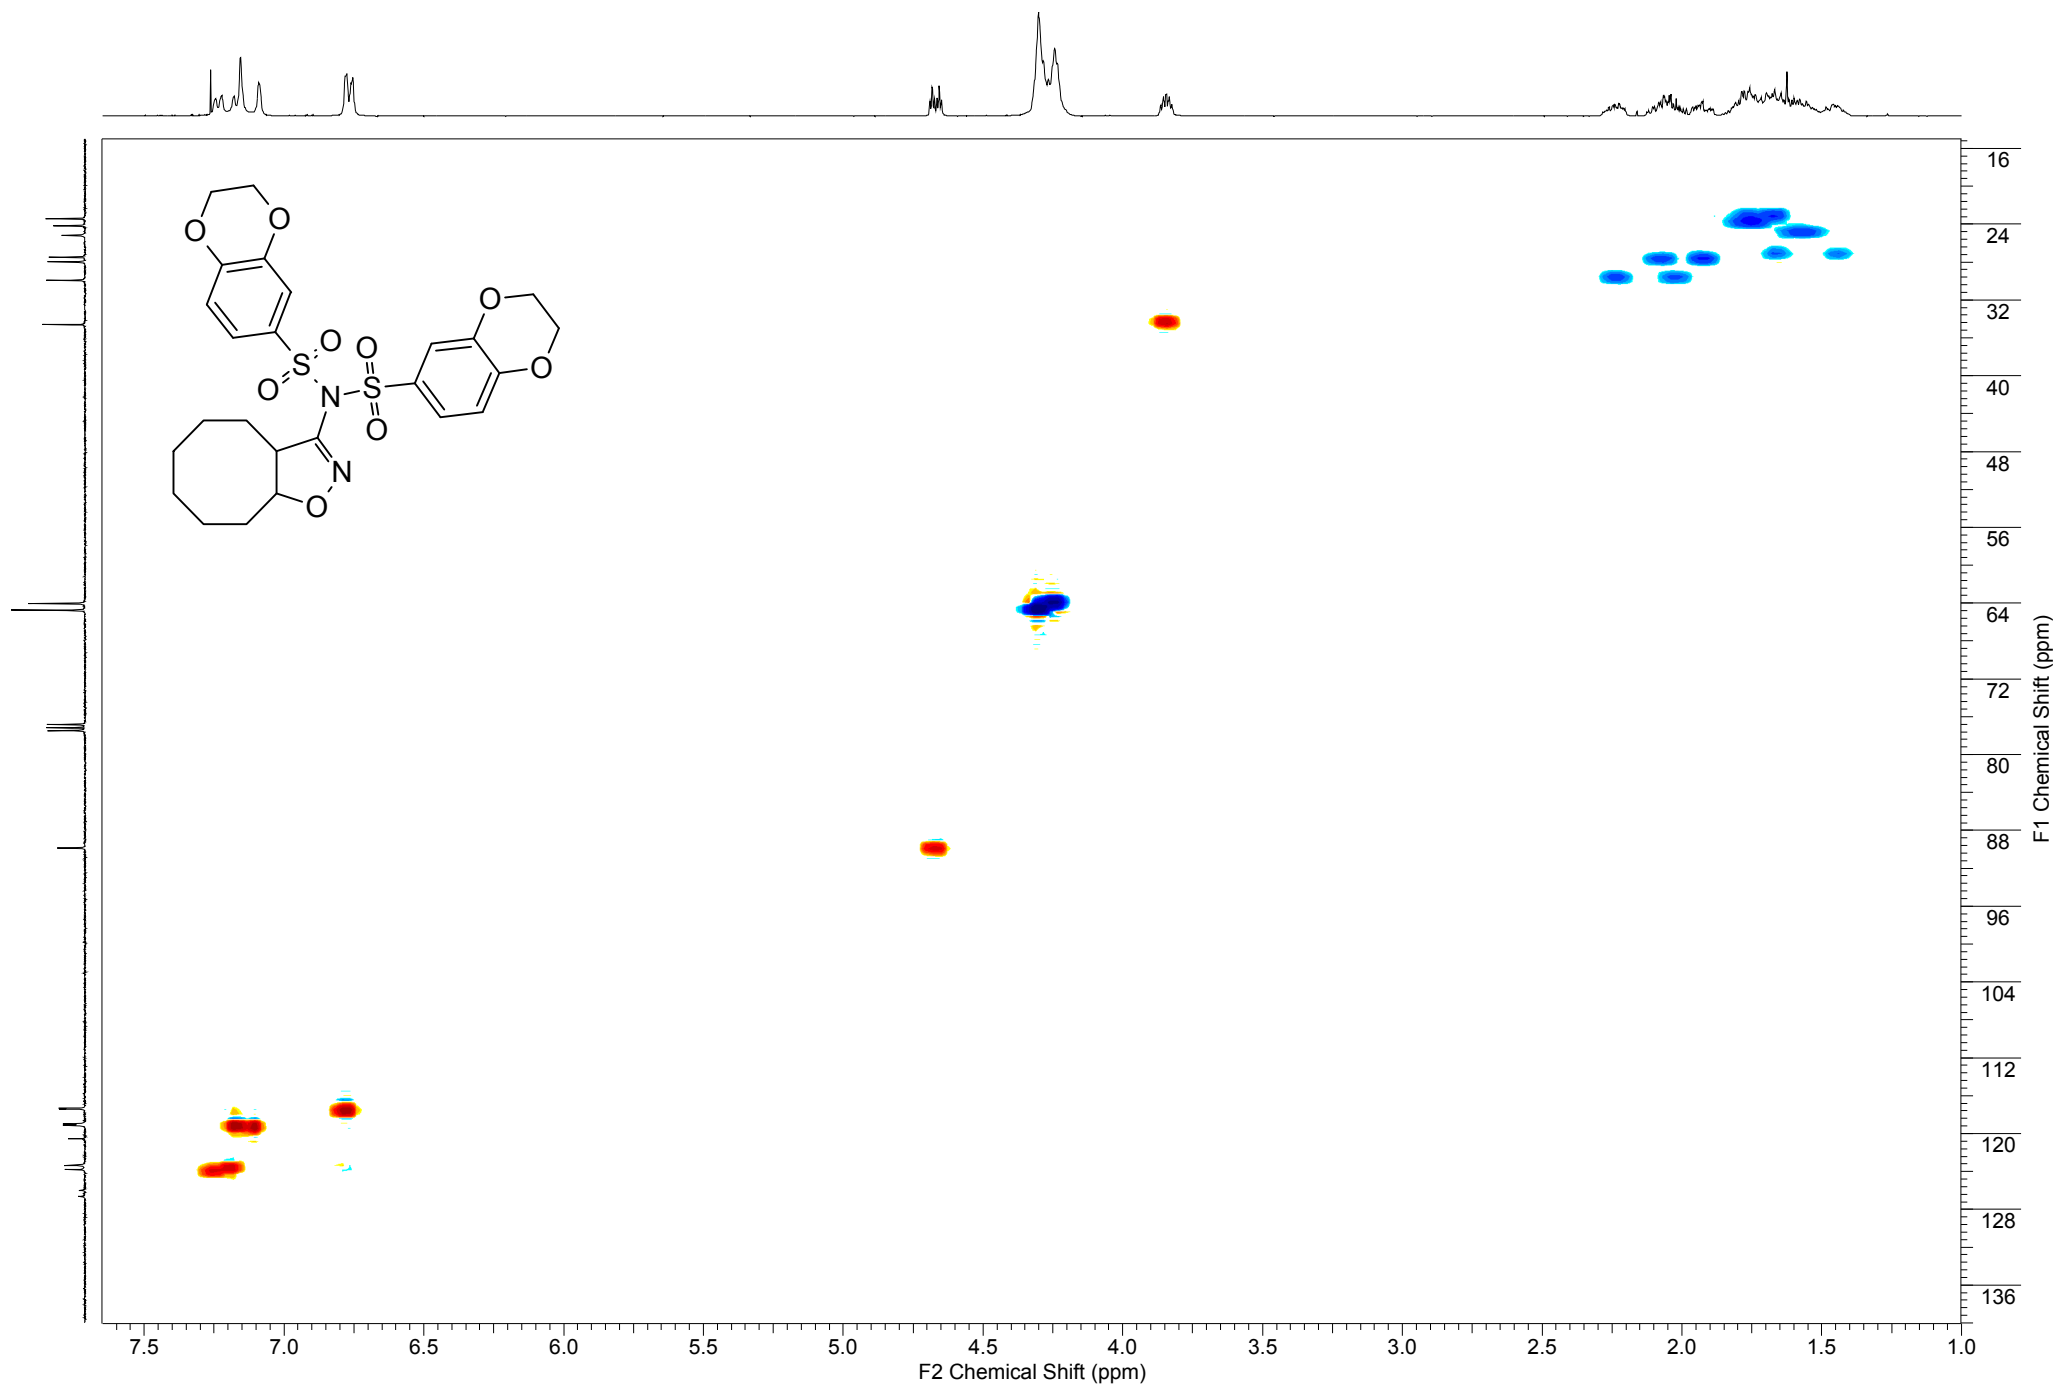

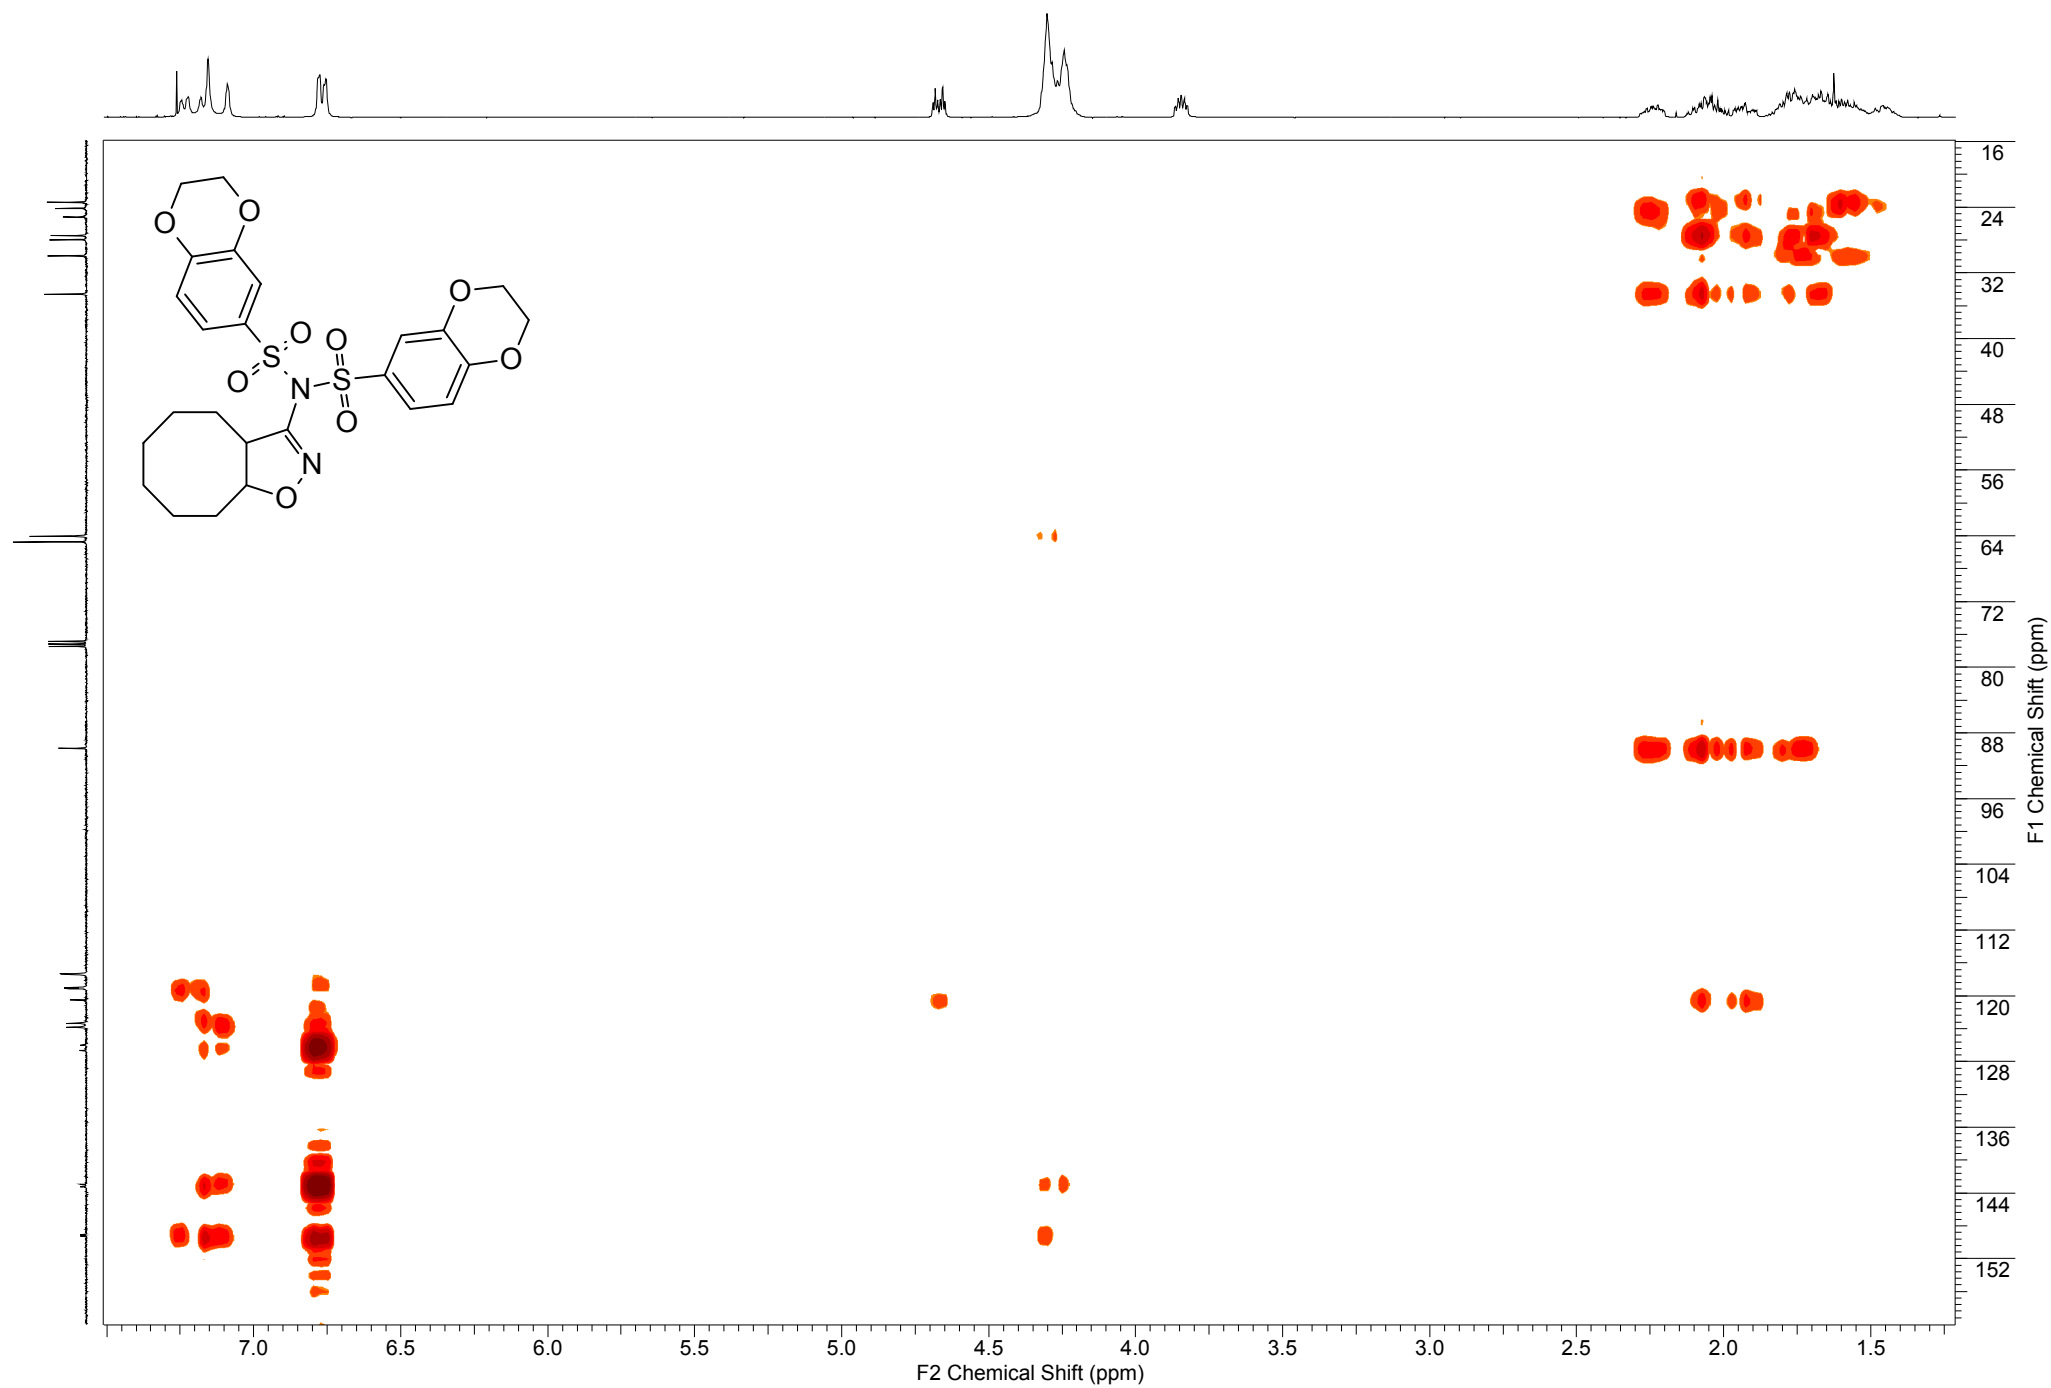



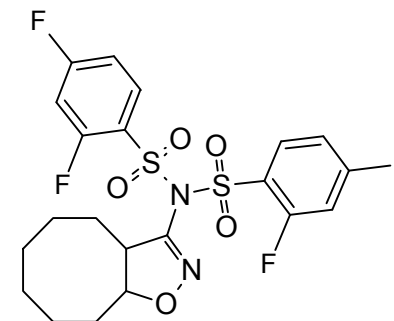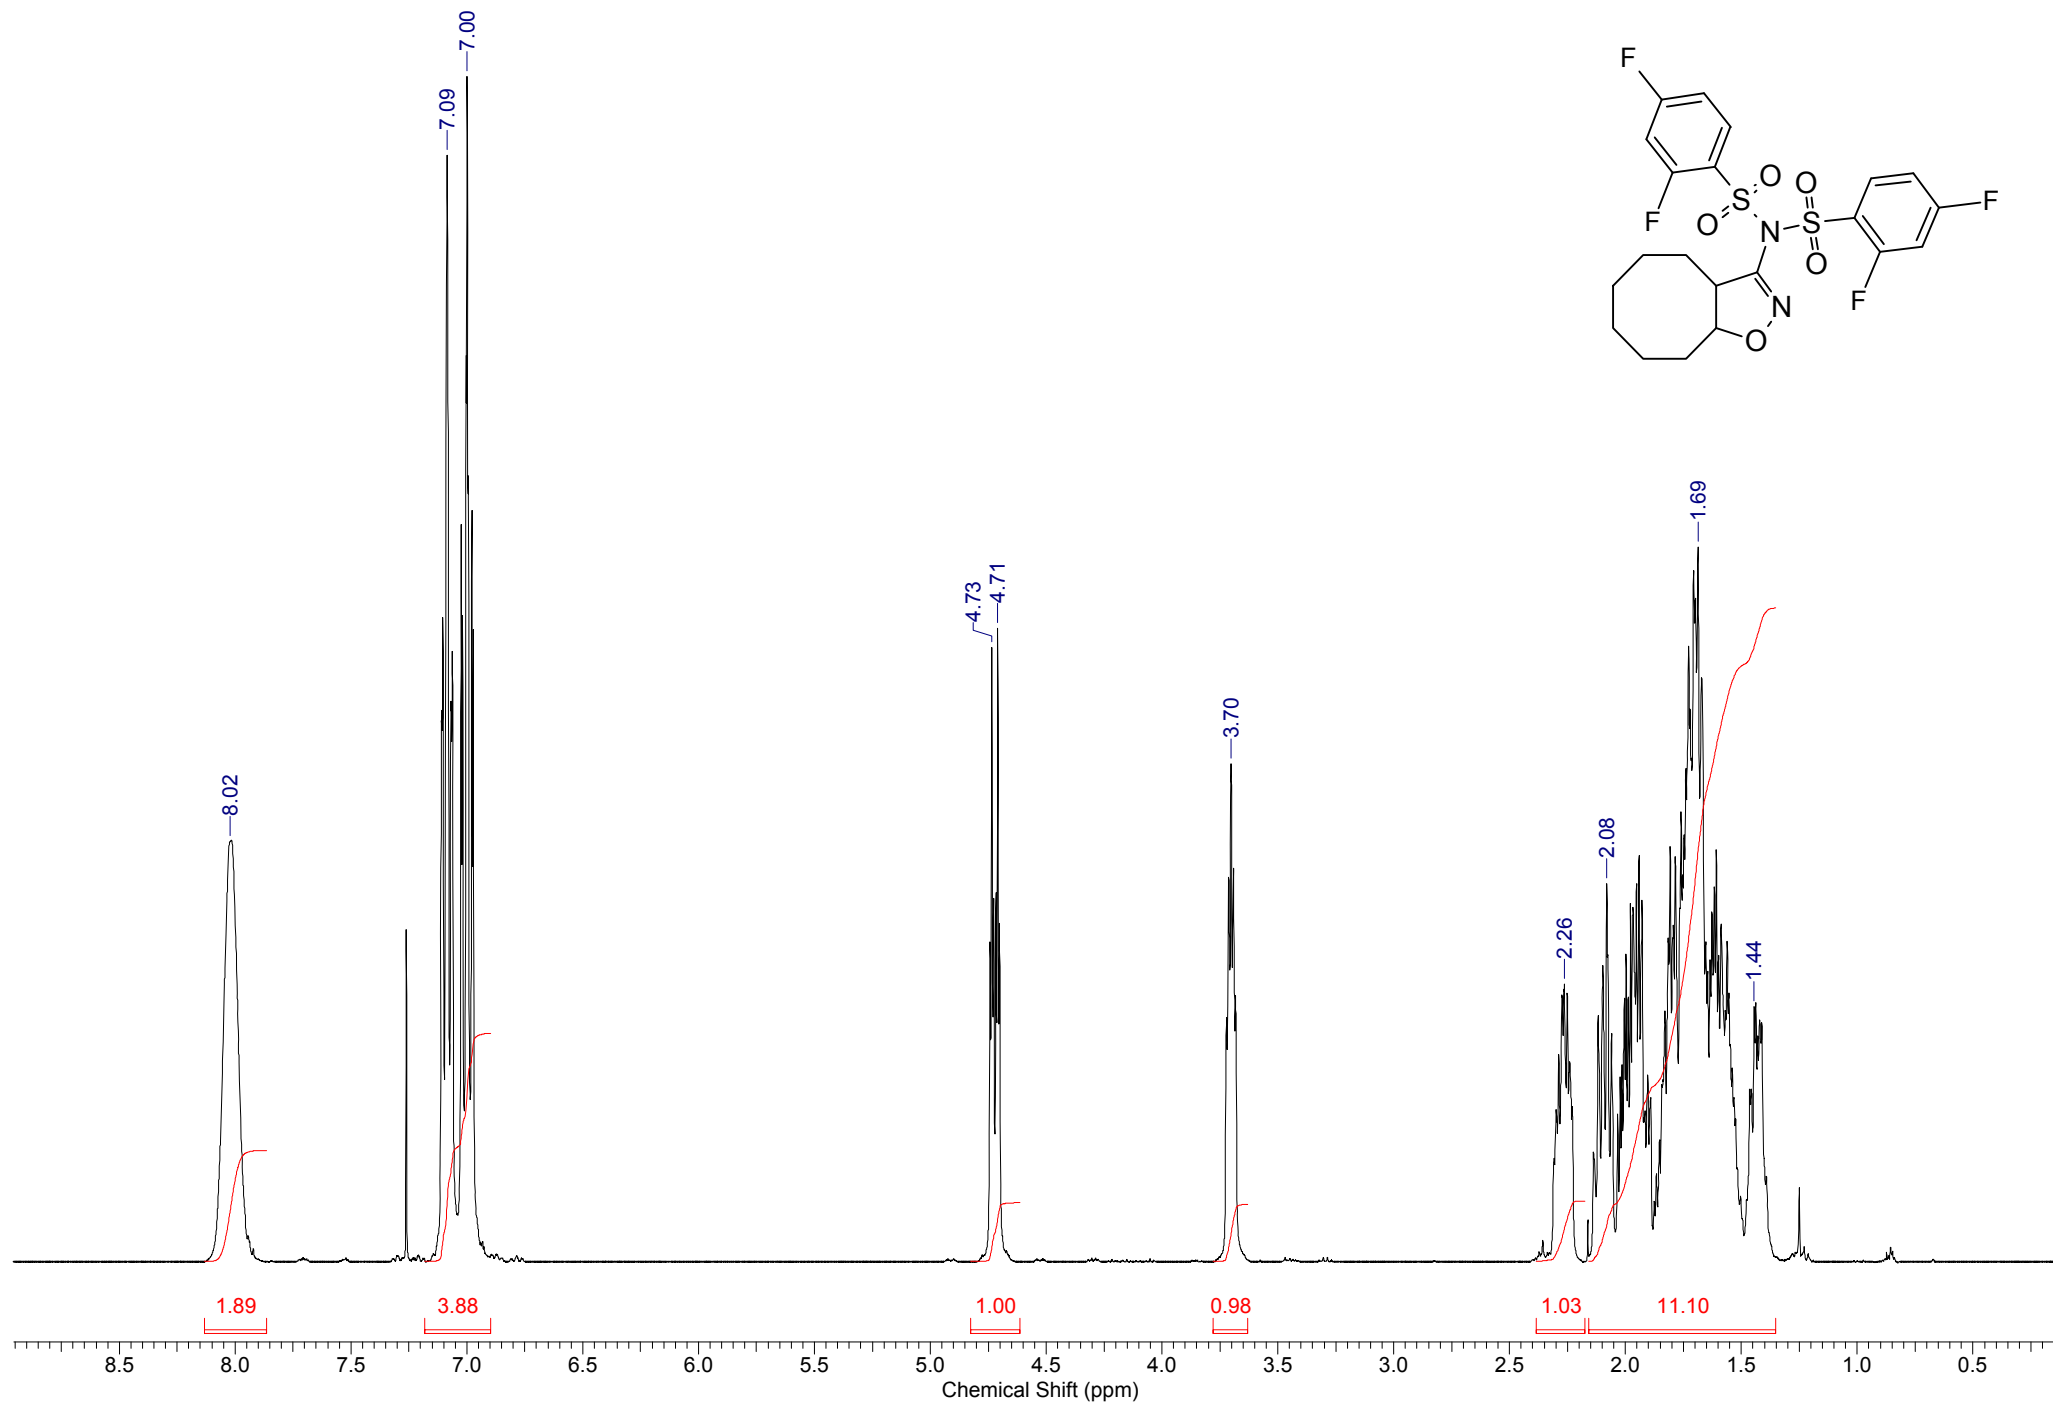

<sup>13</sup>C NMR spectrum of compound **5g** (CDCl<sub>3</sub>)

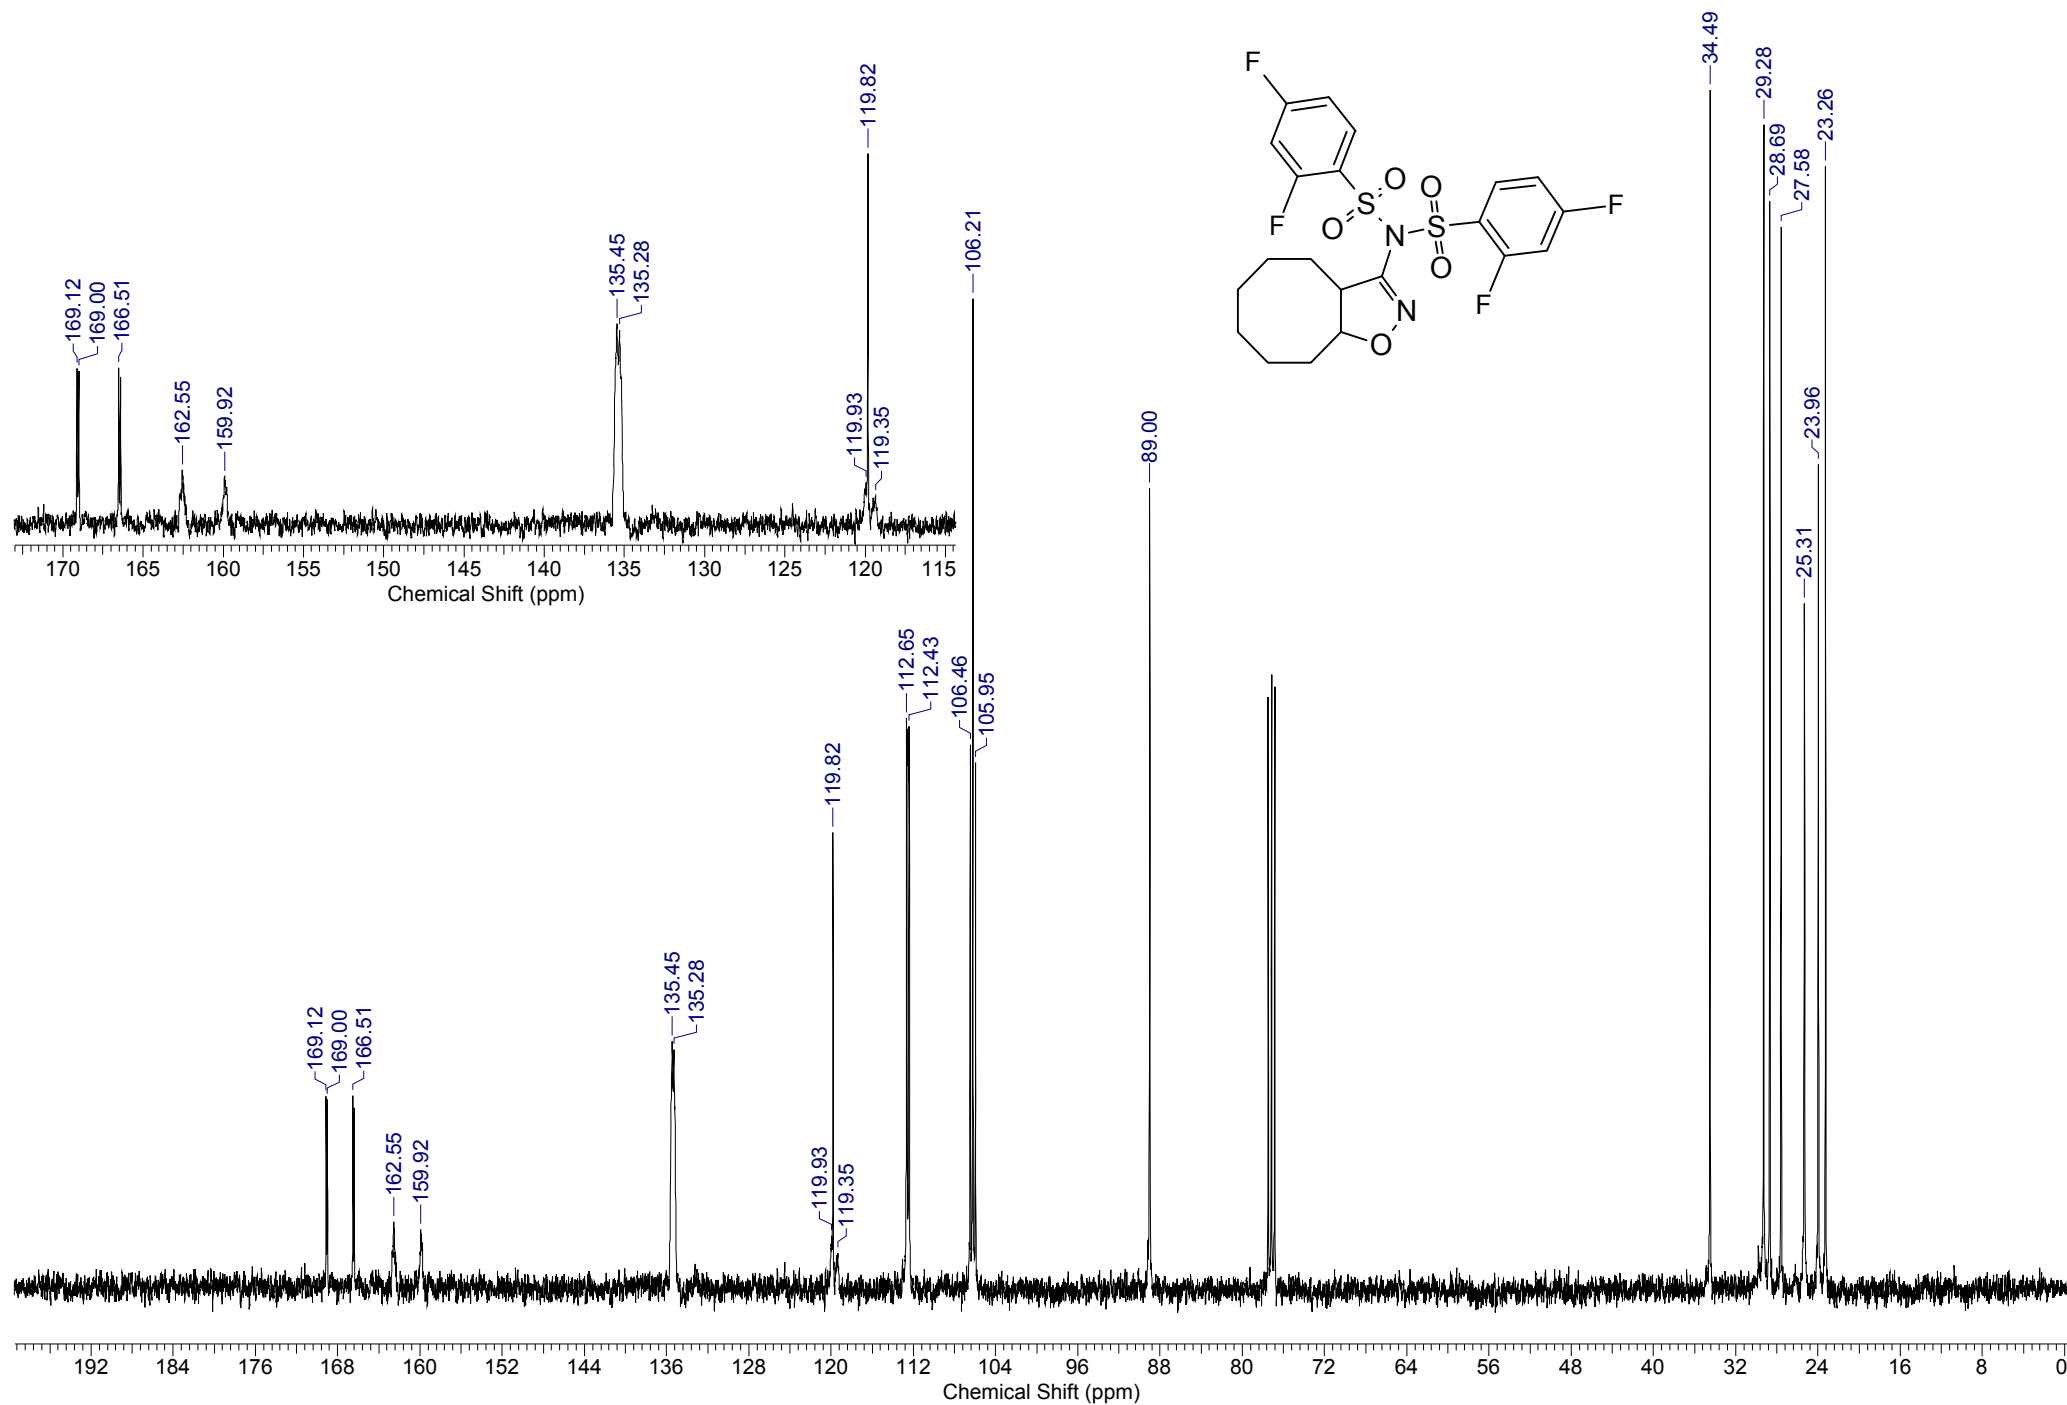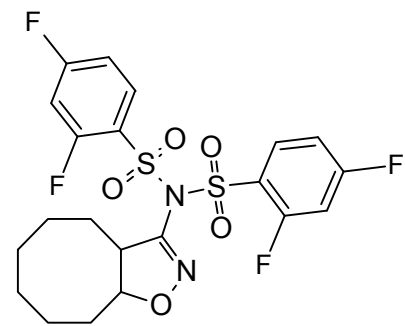

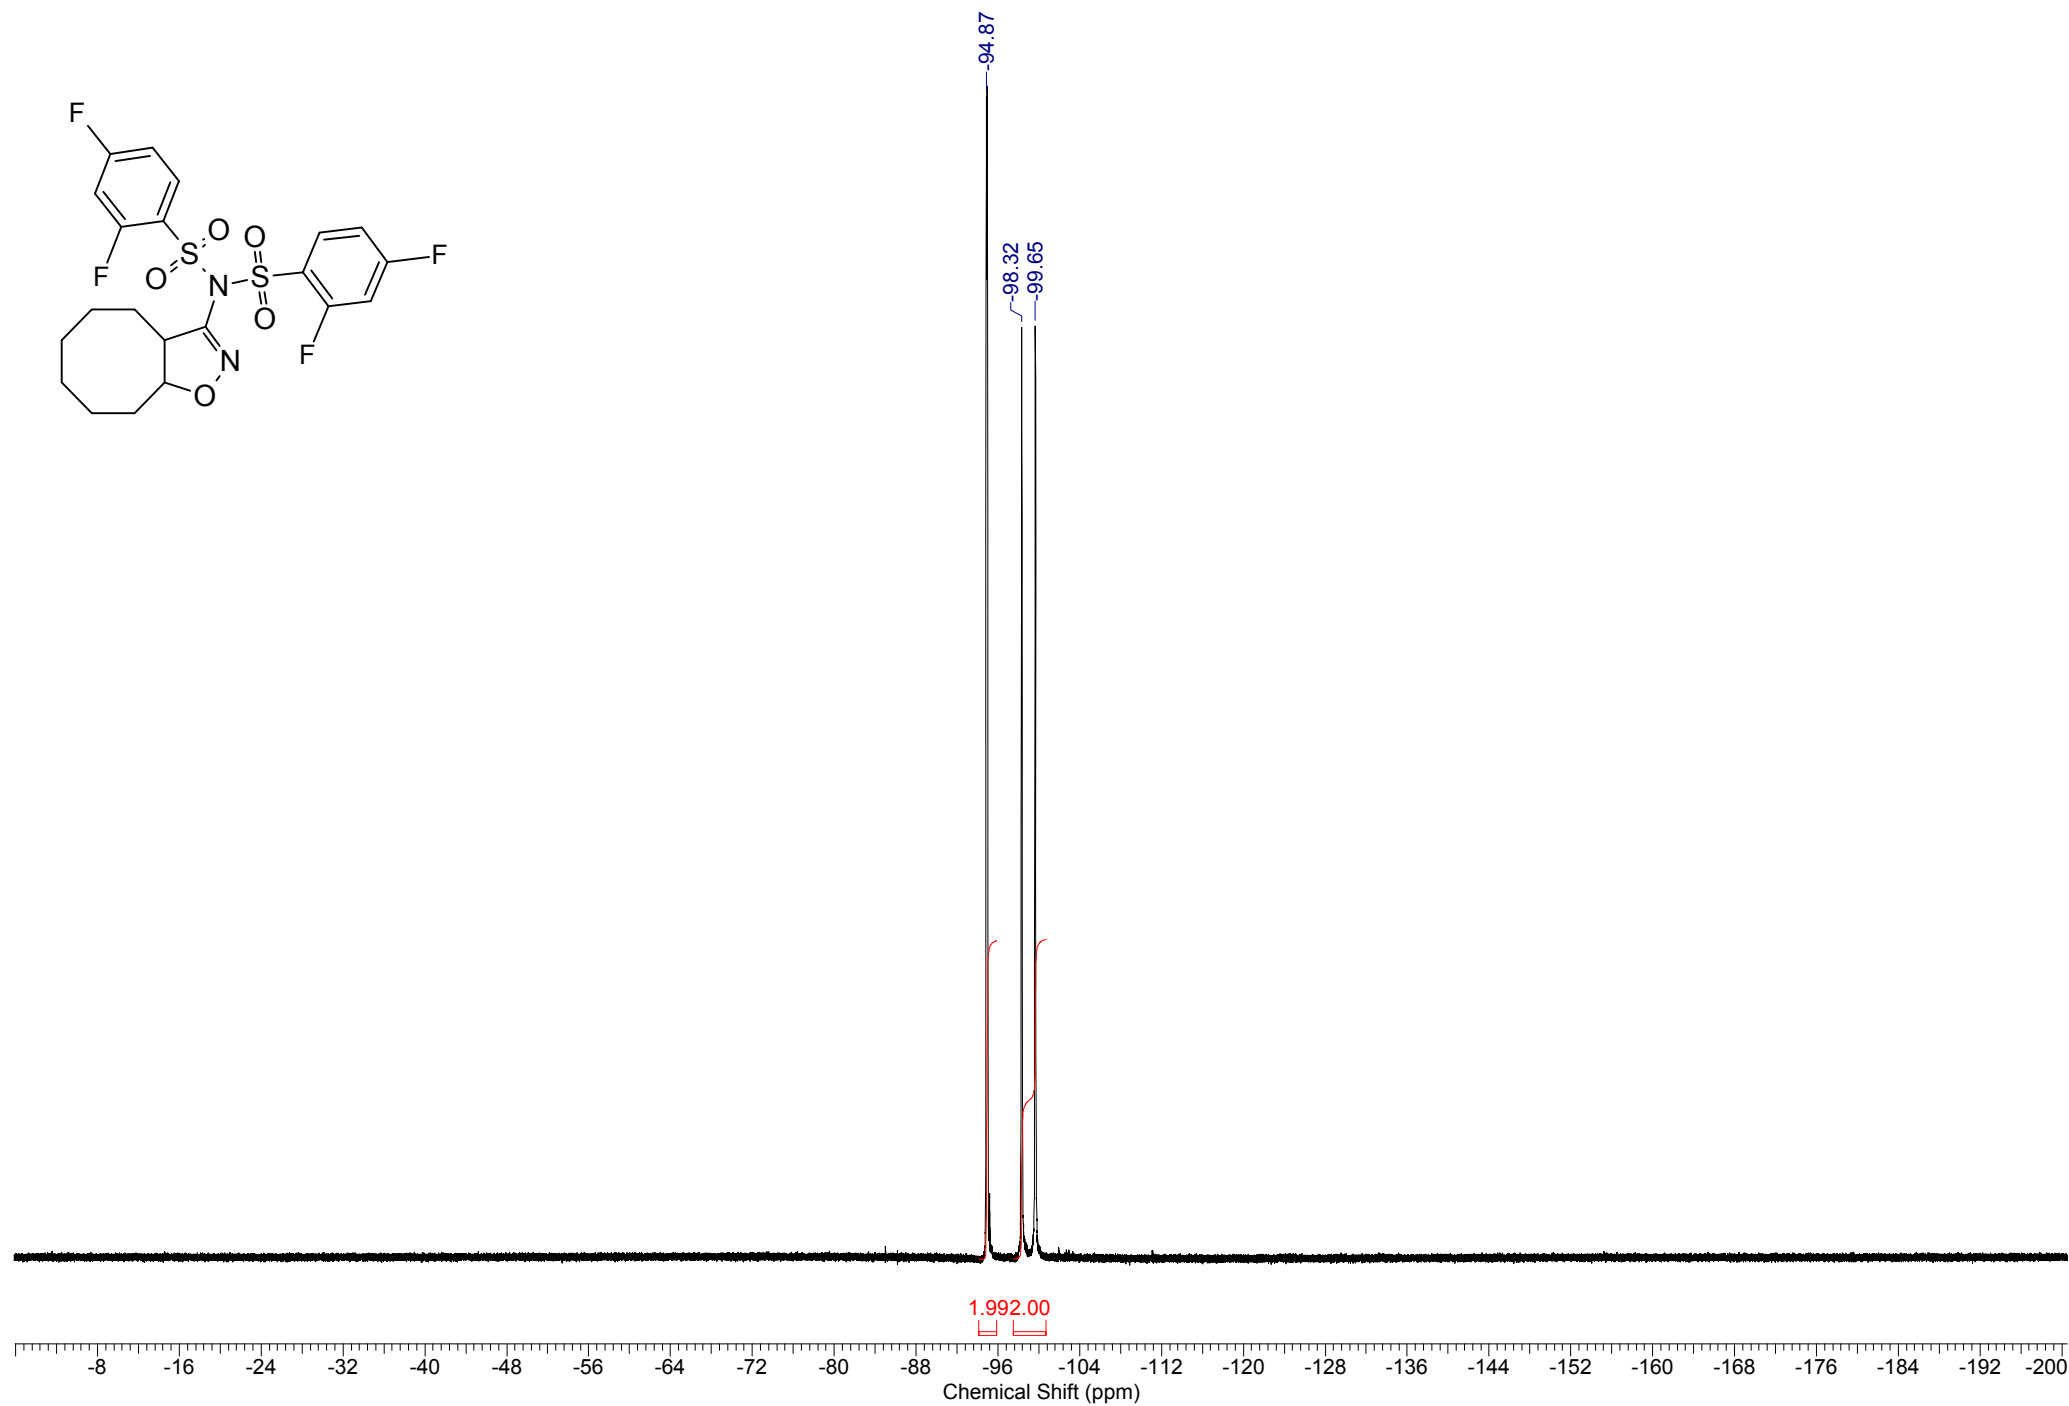

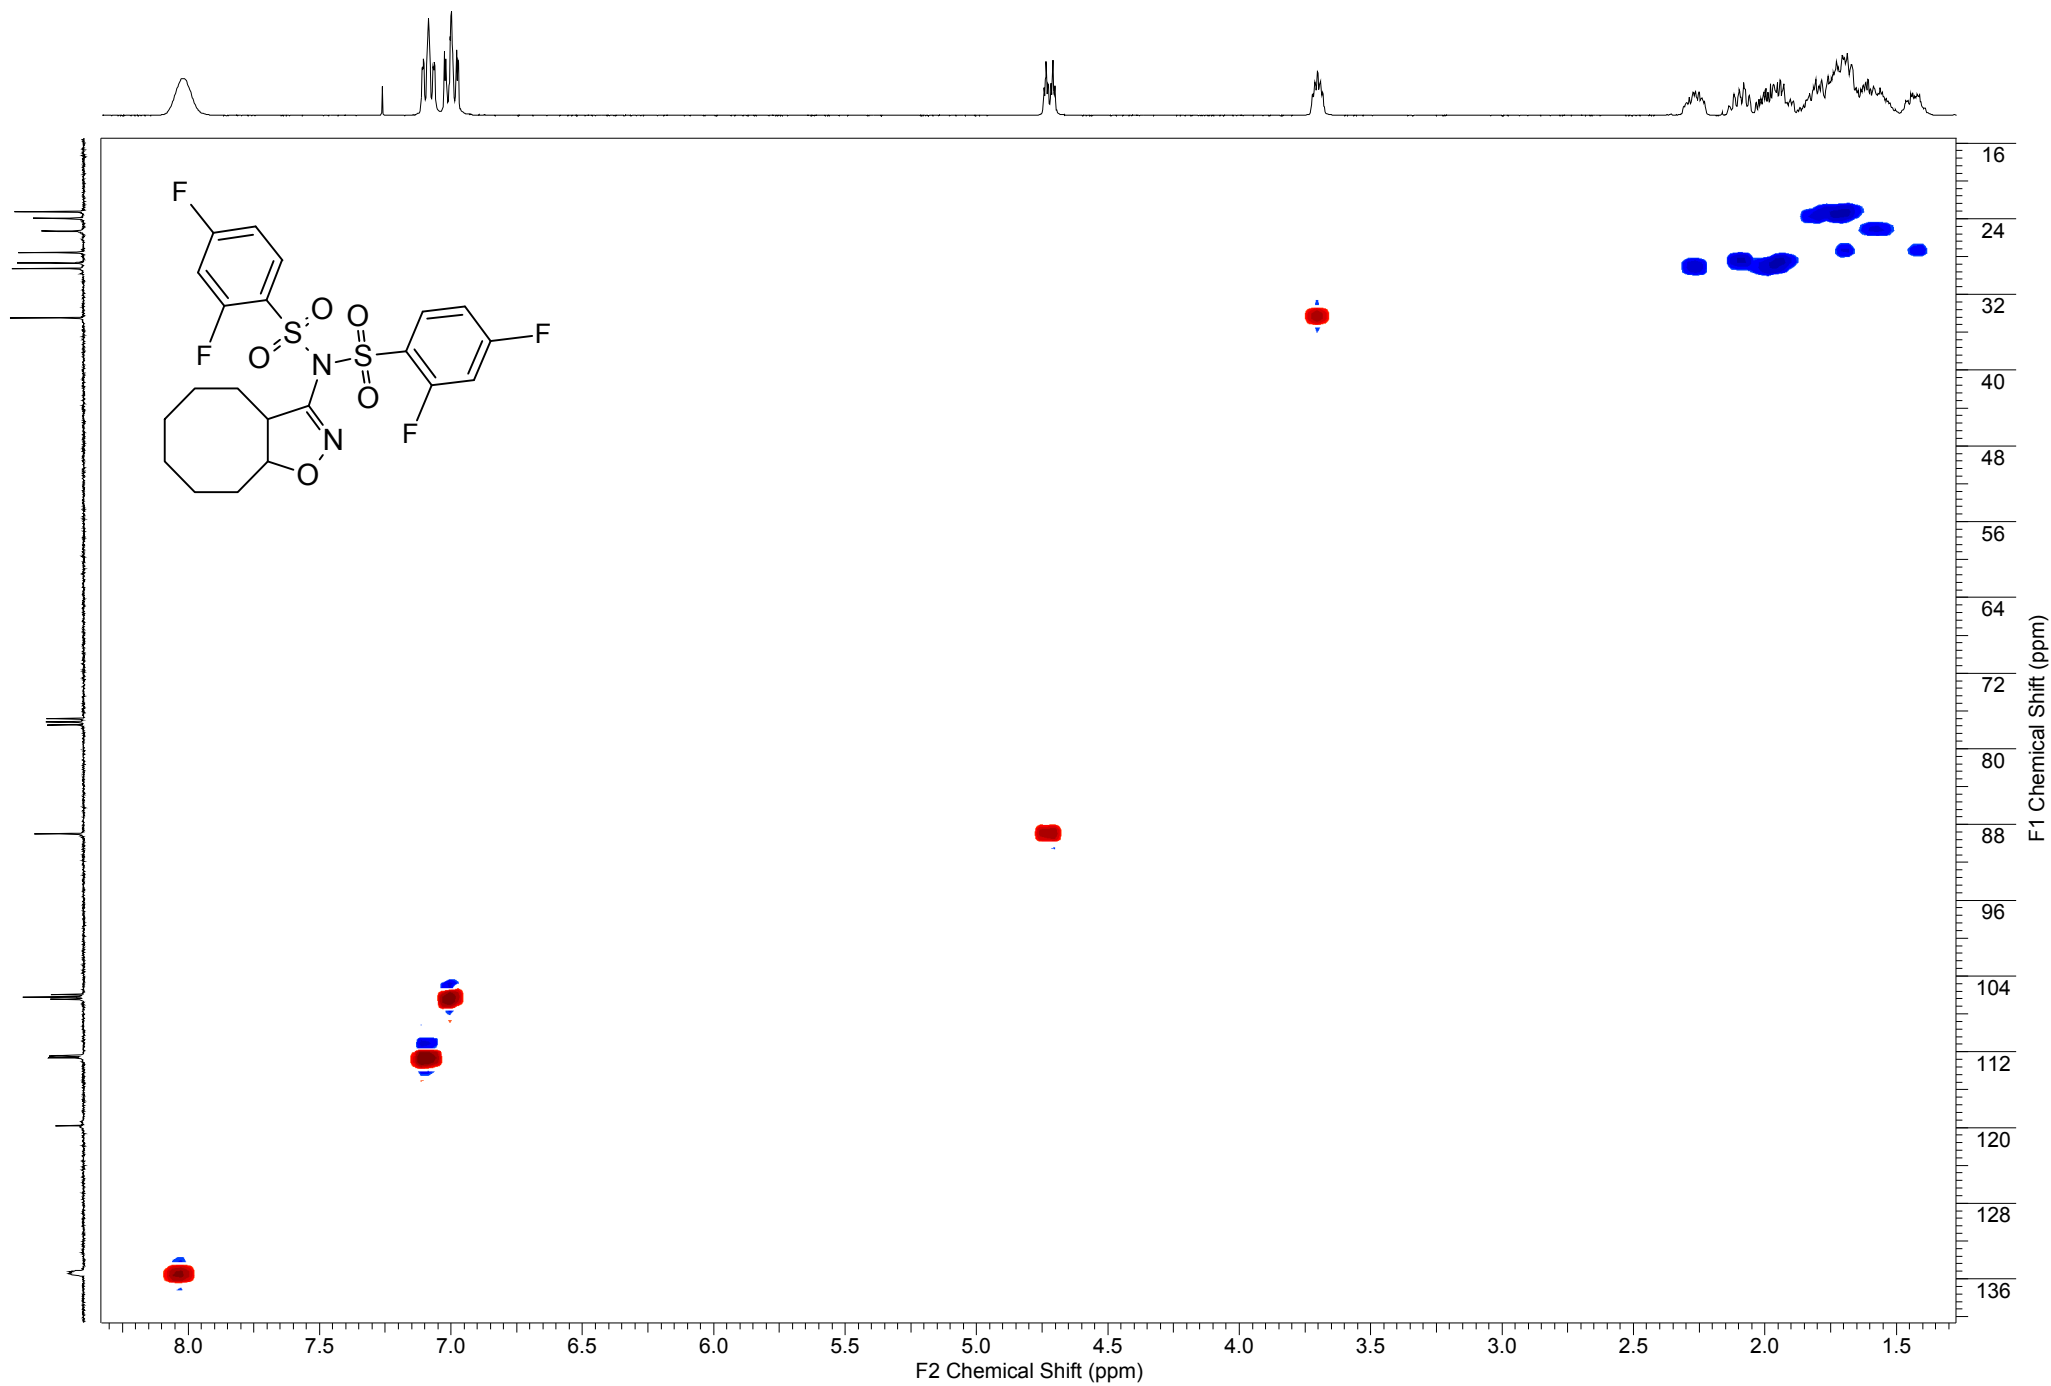

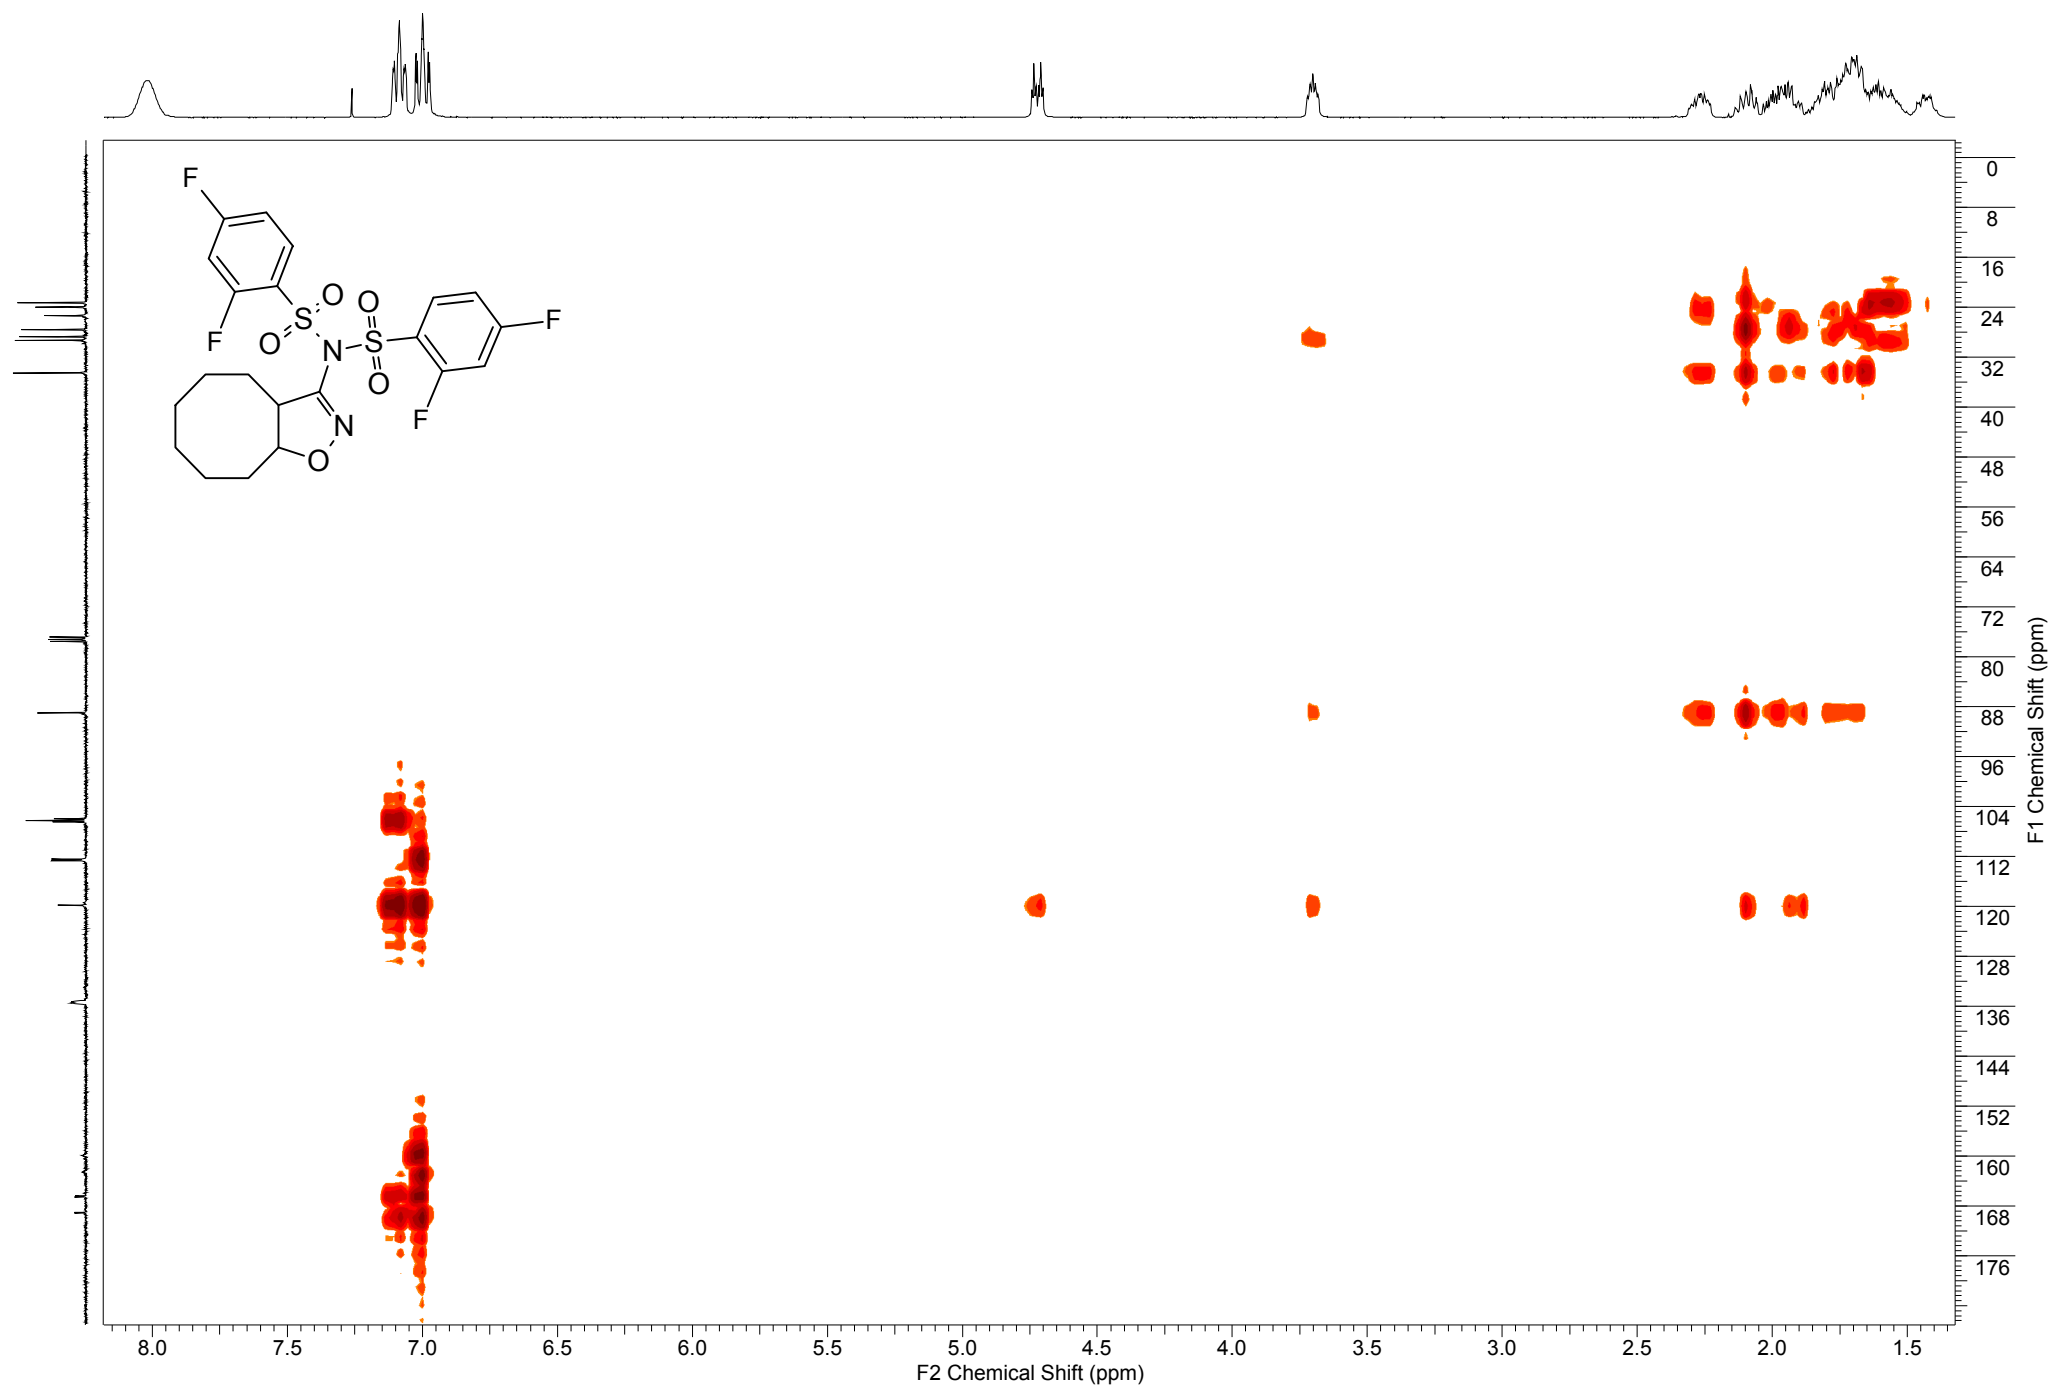

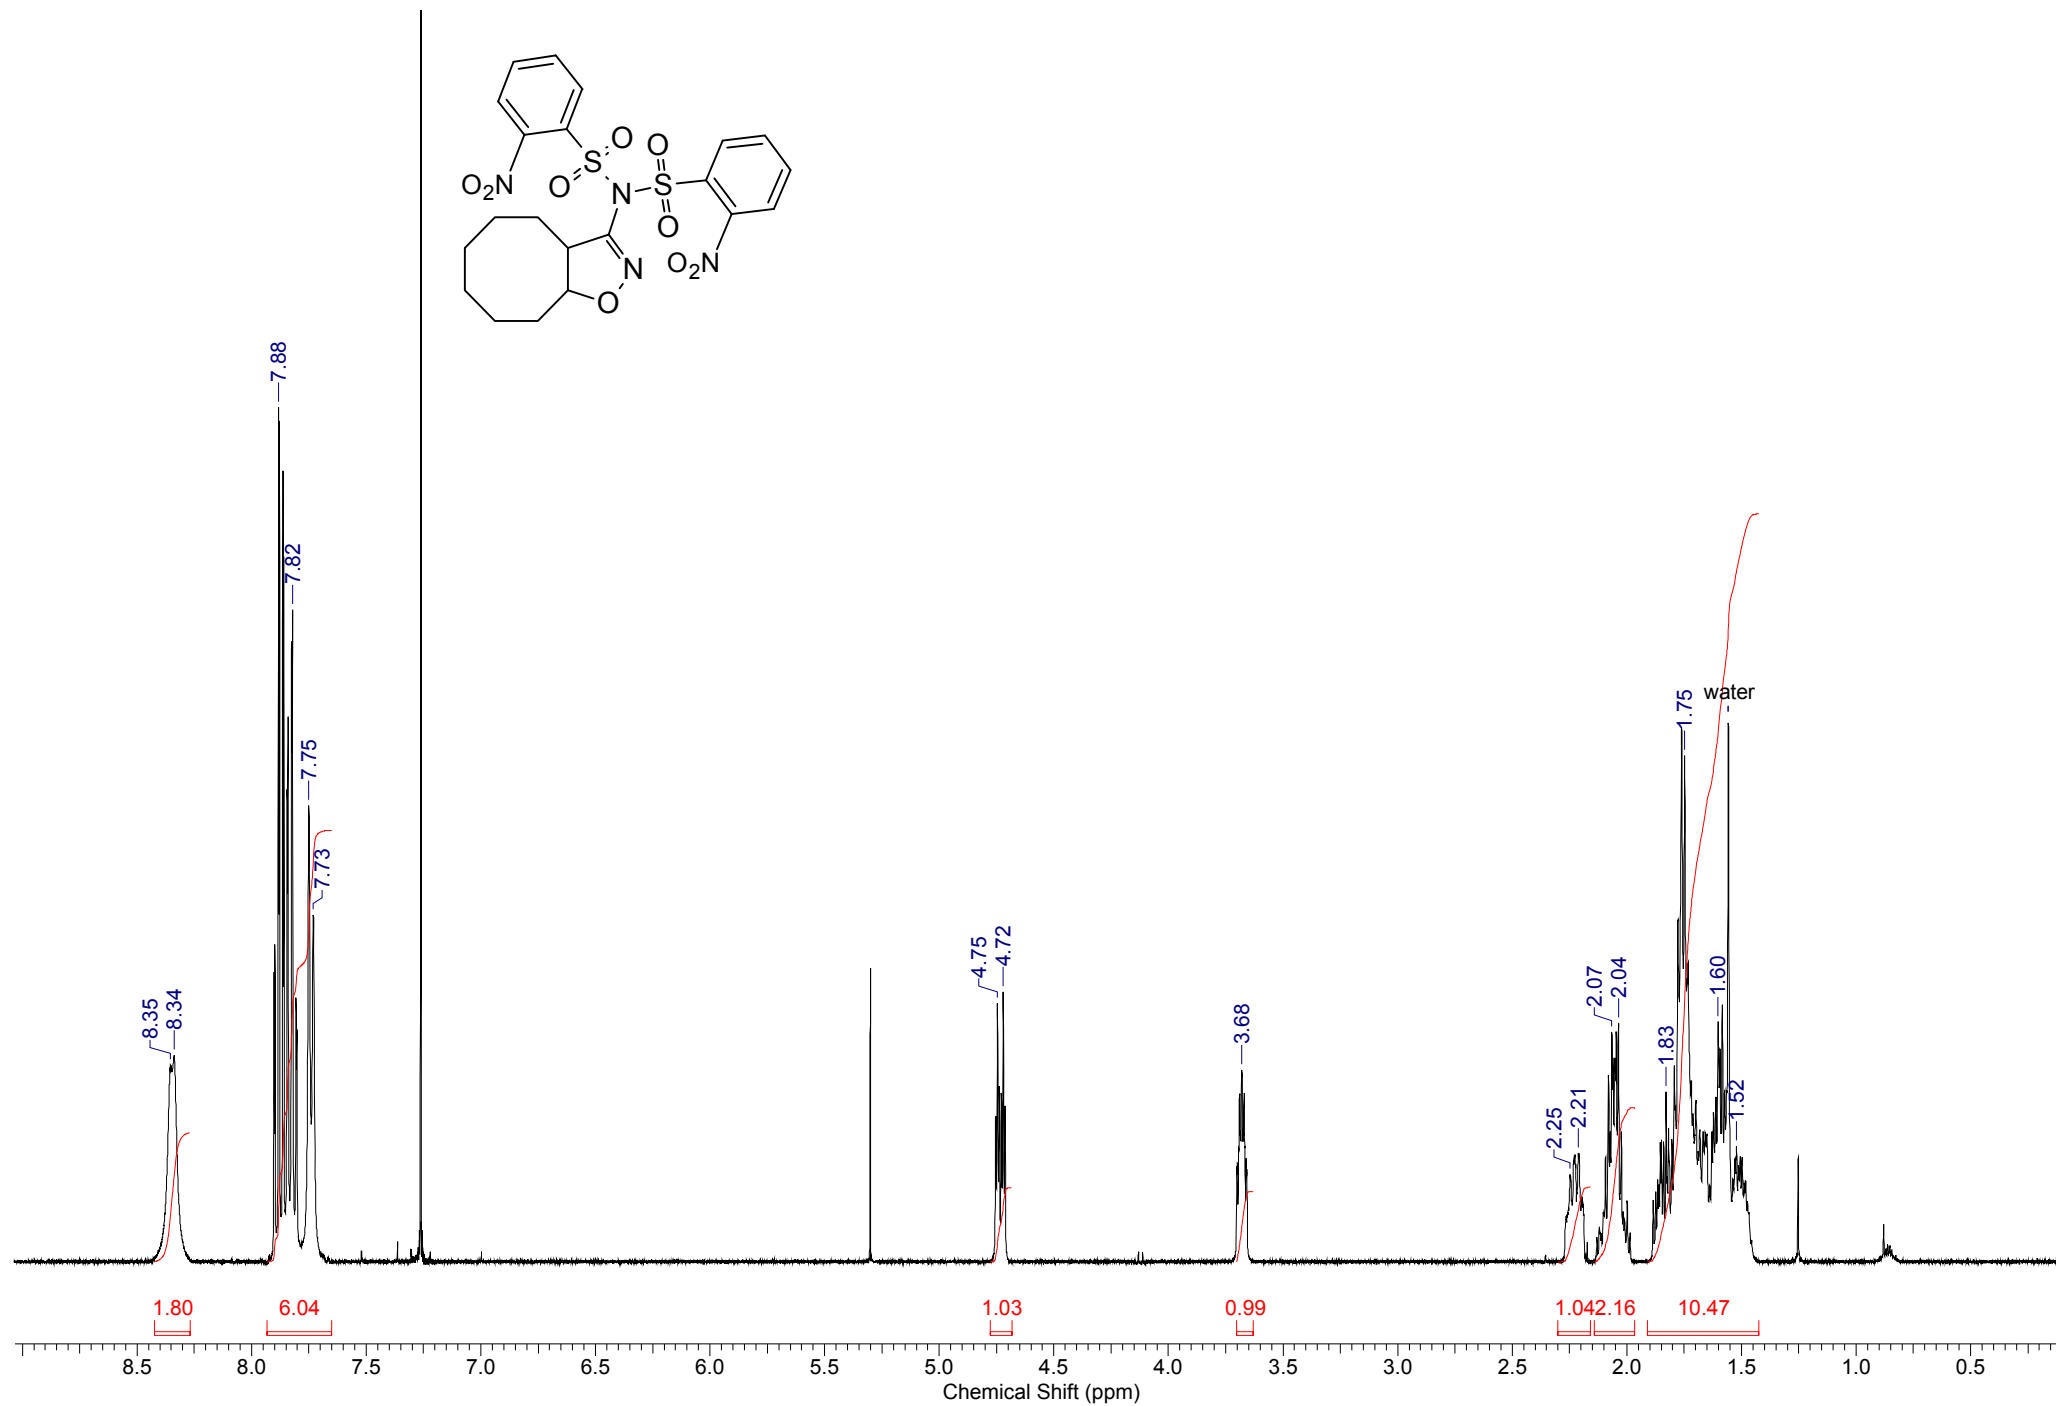

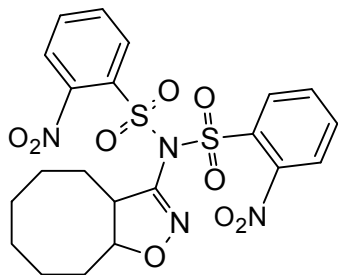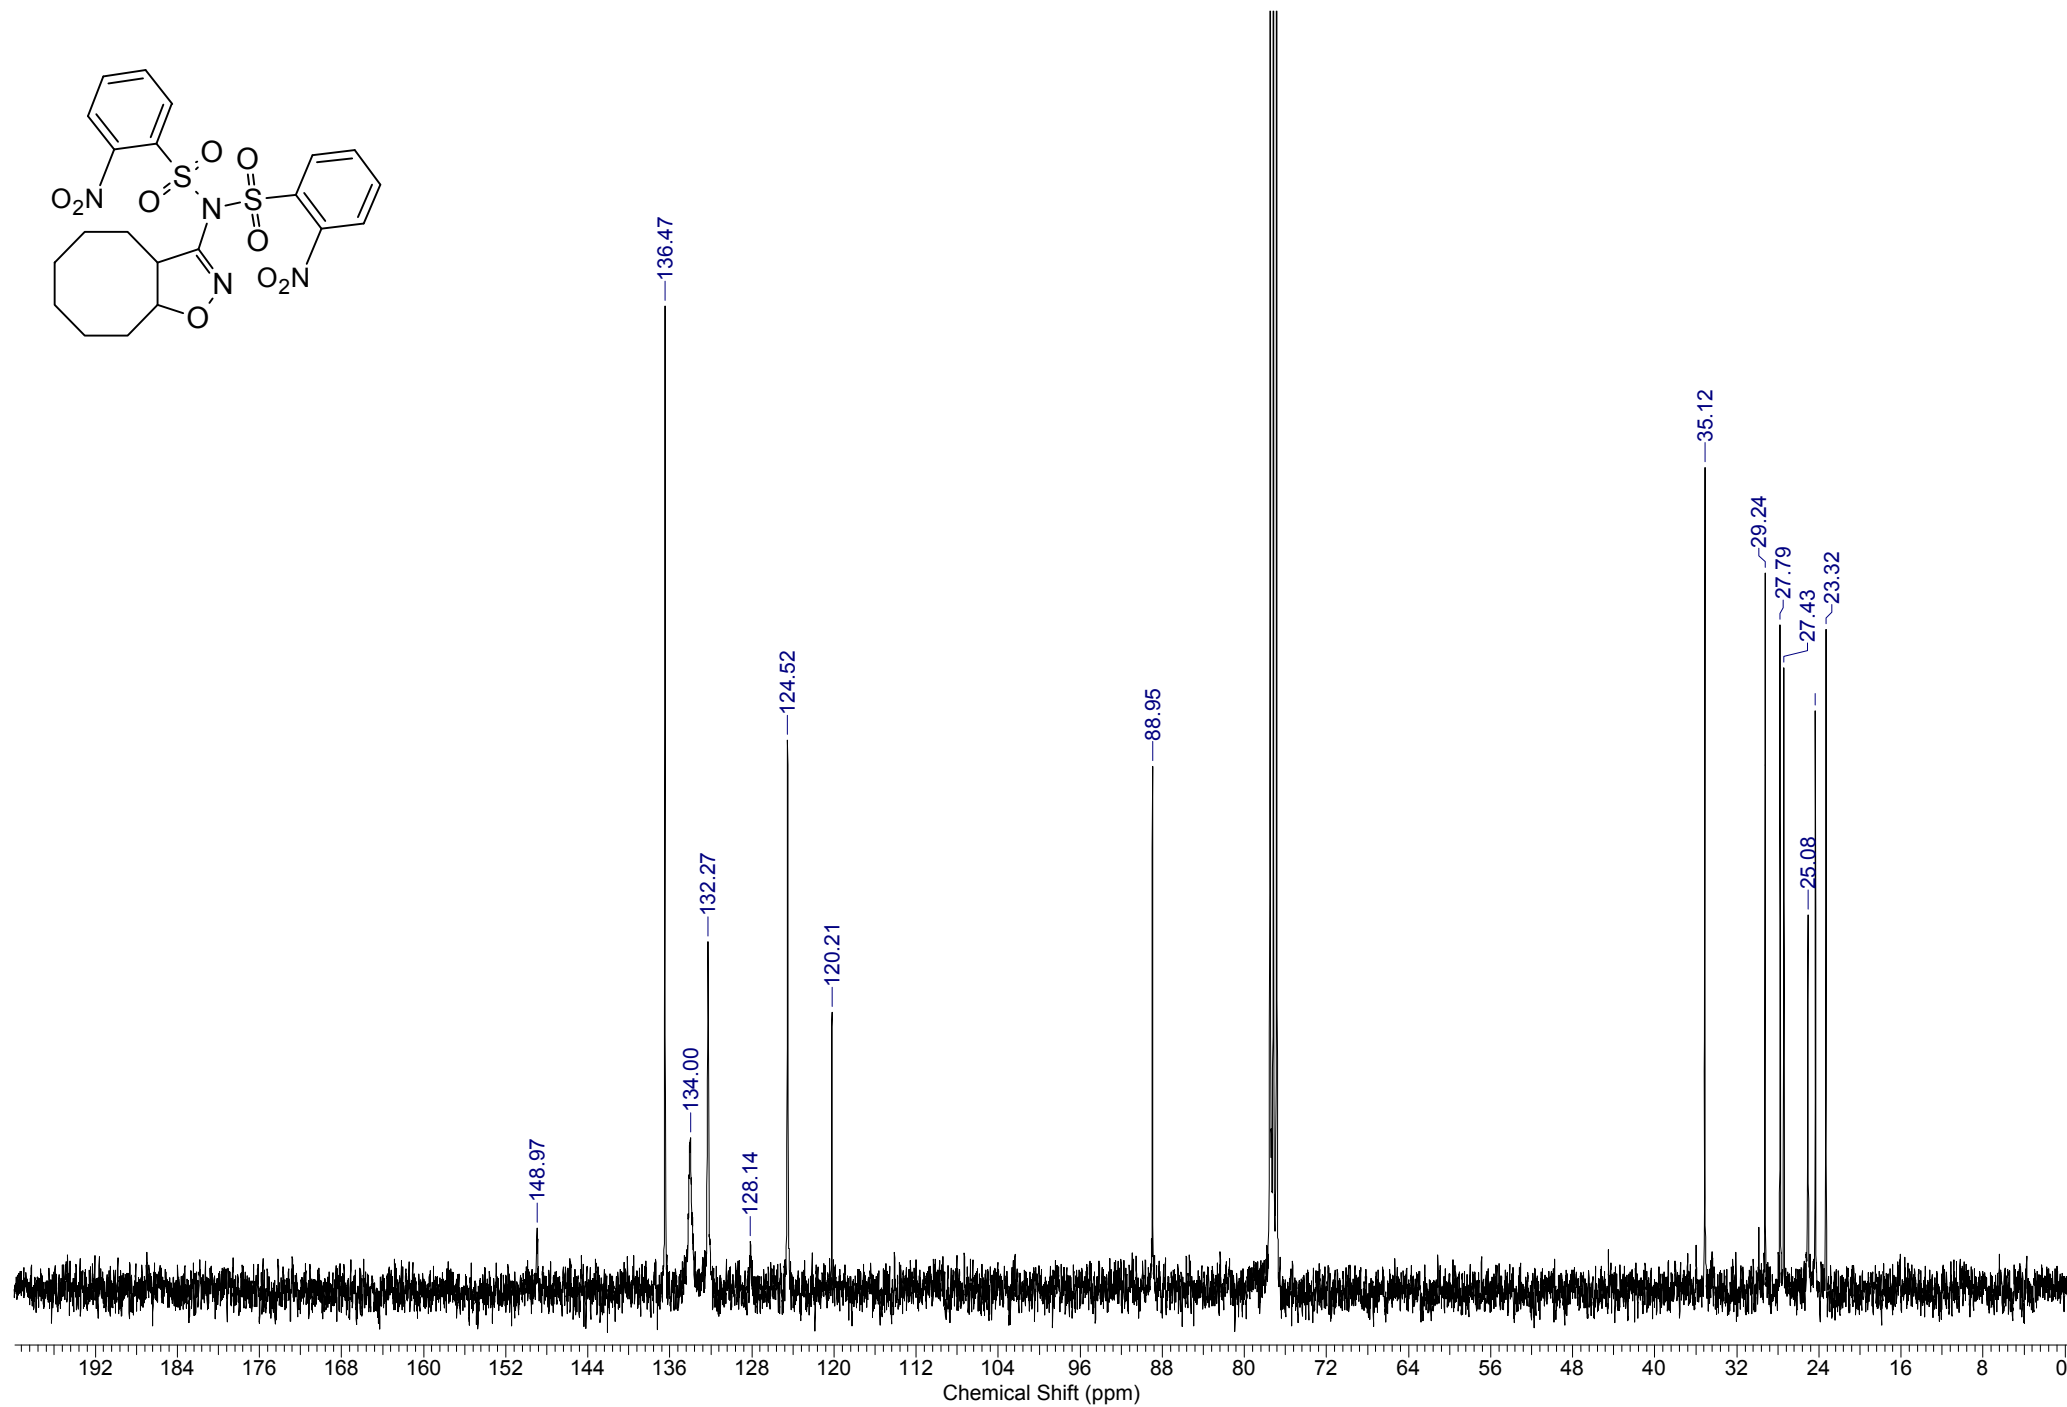

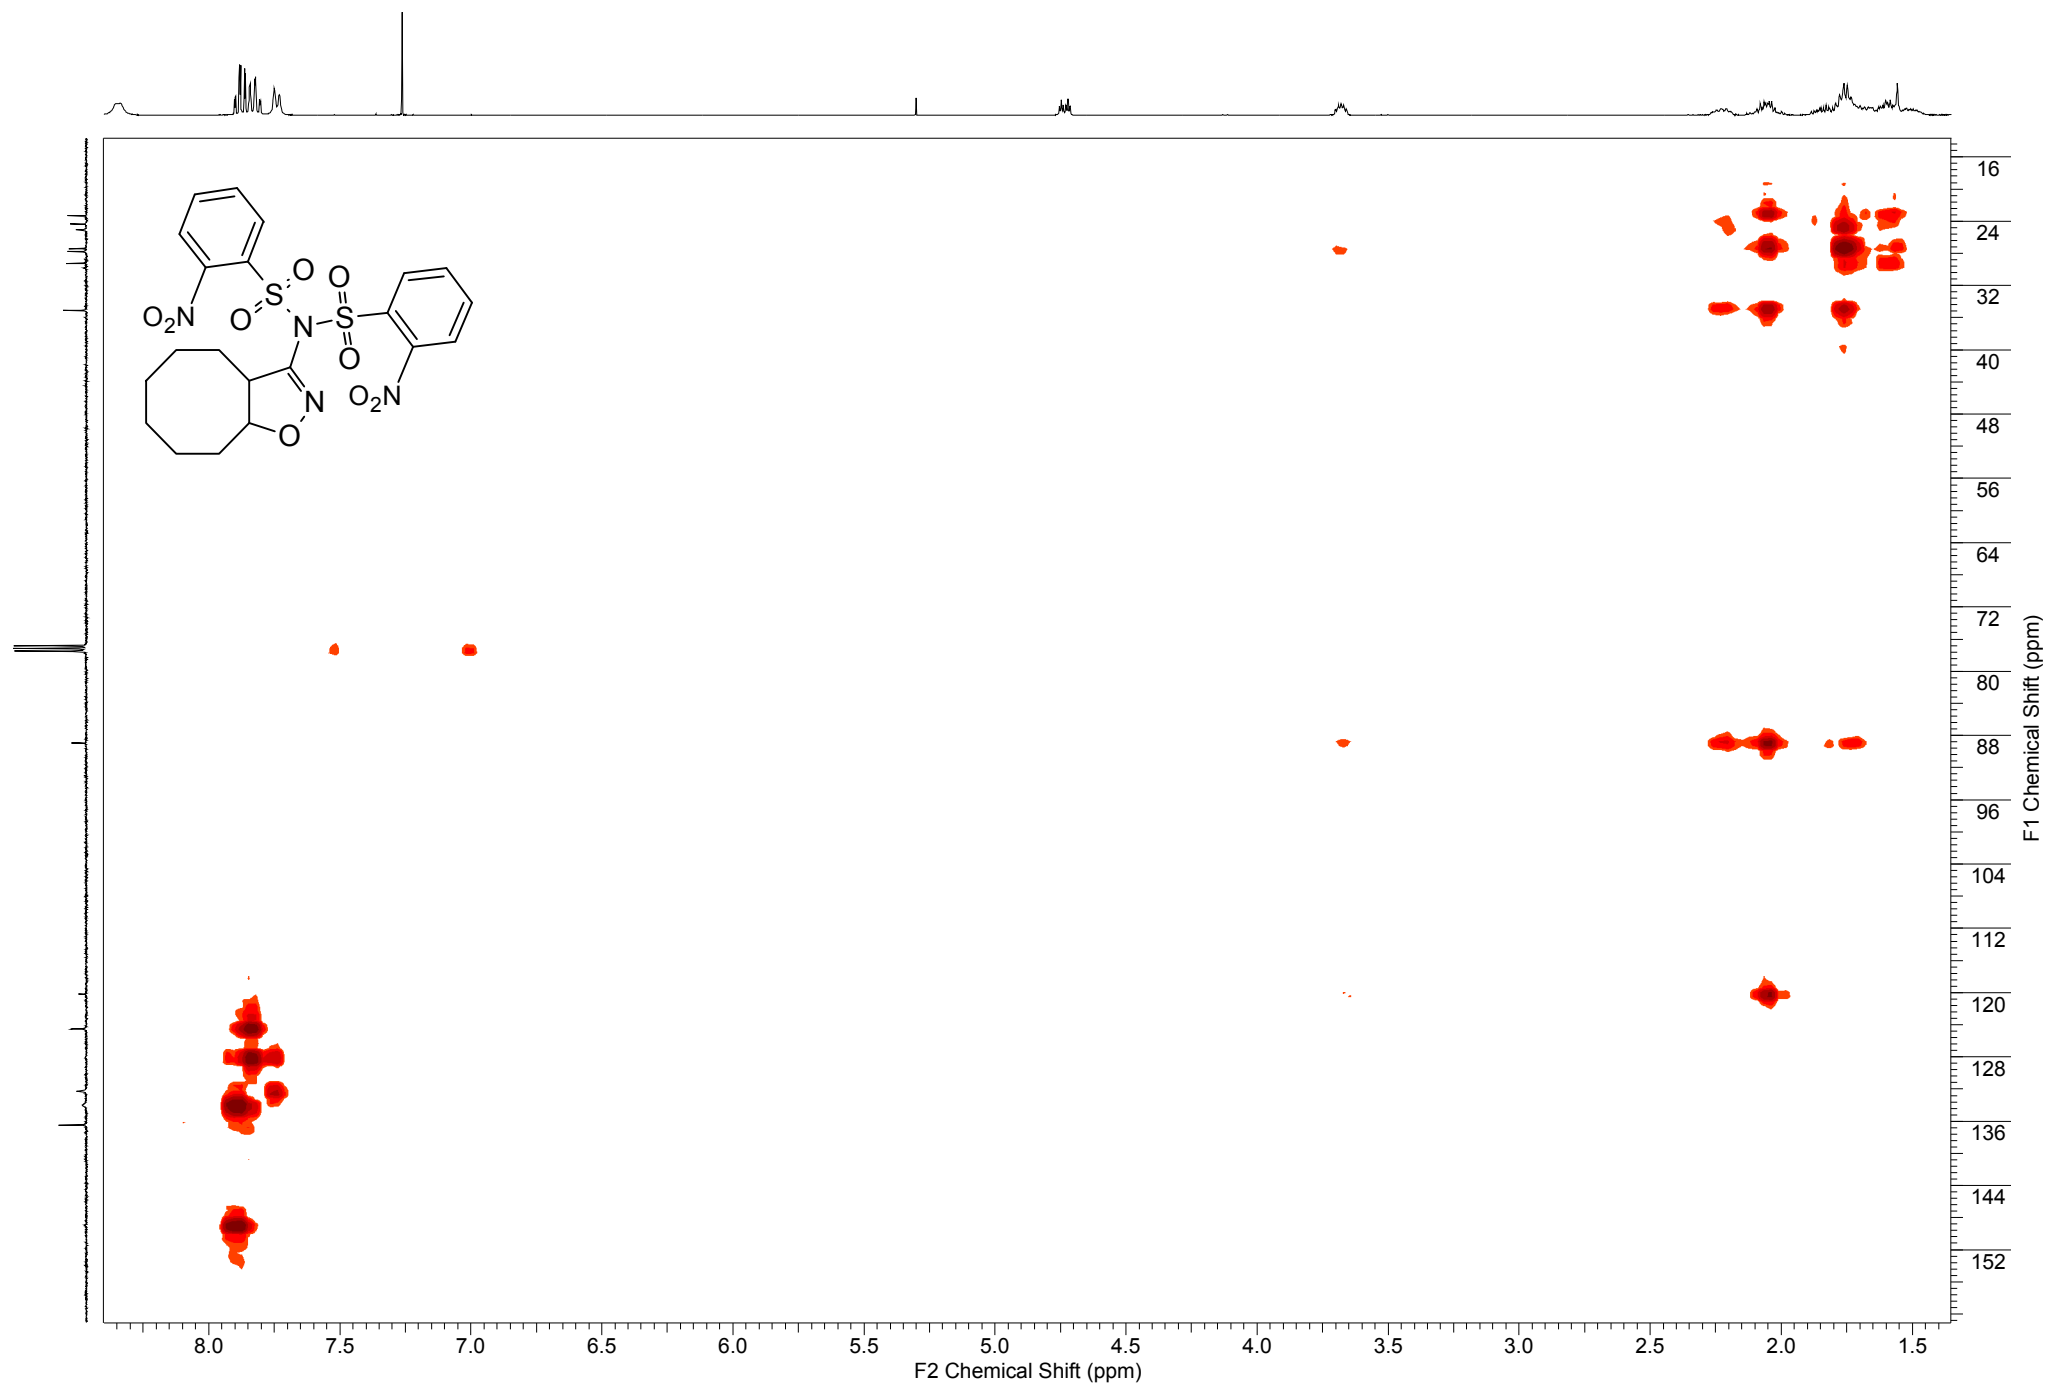



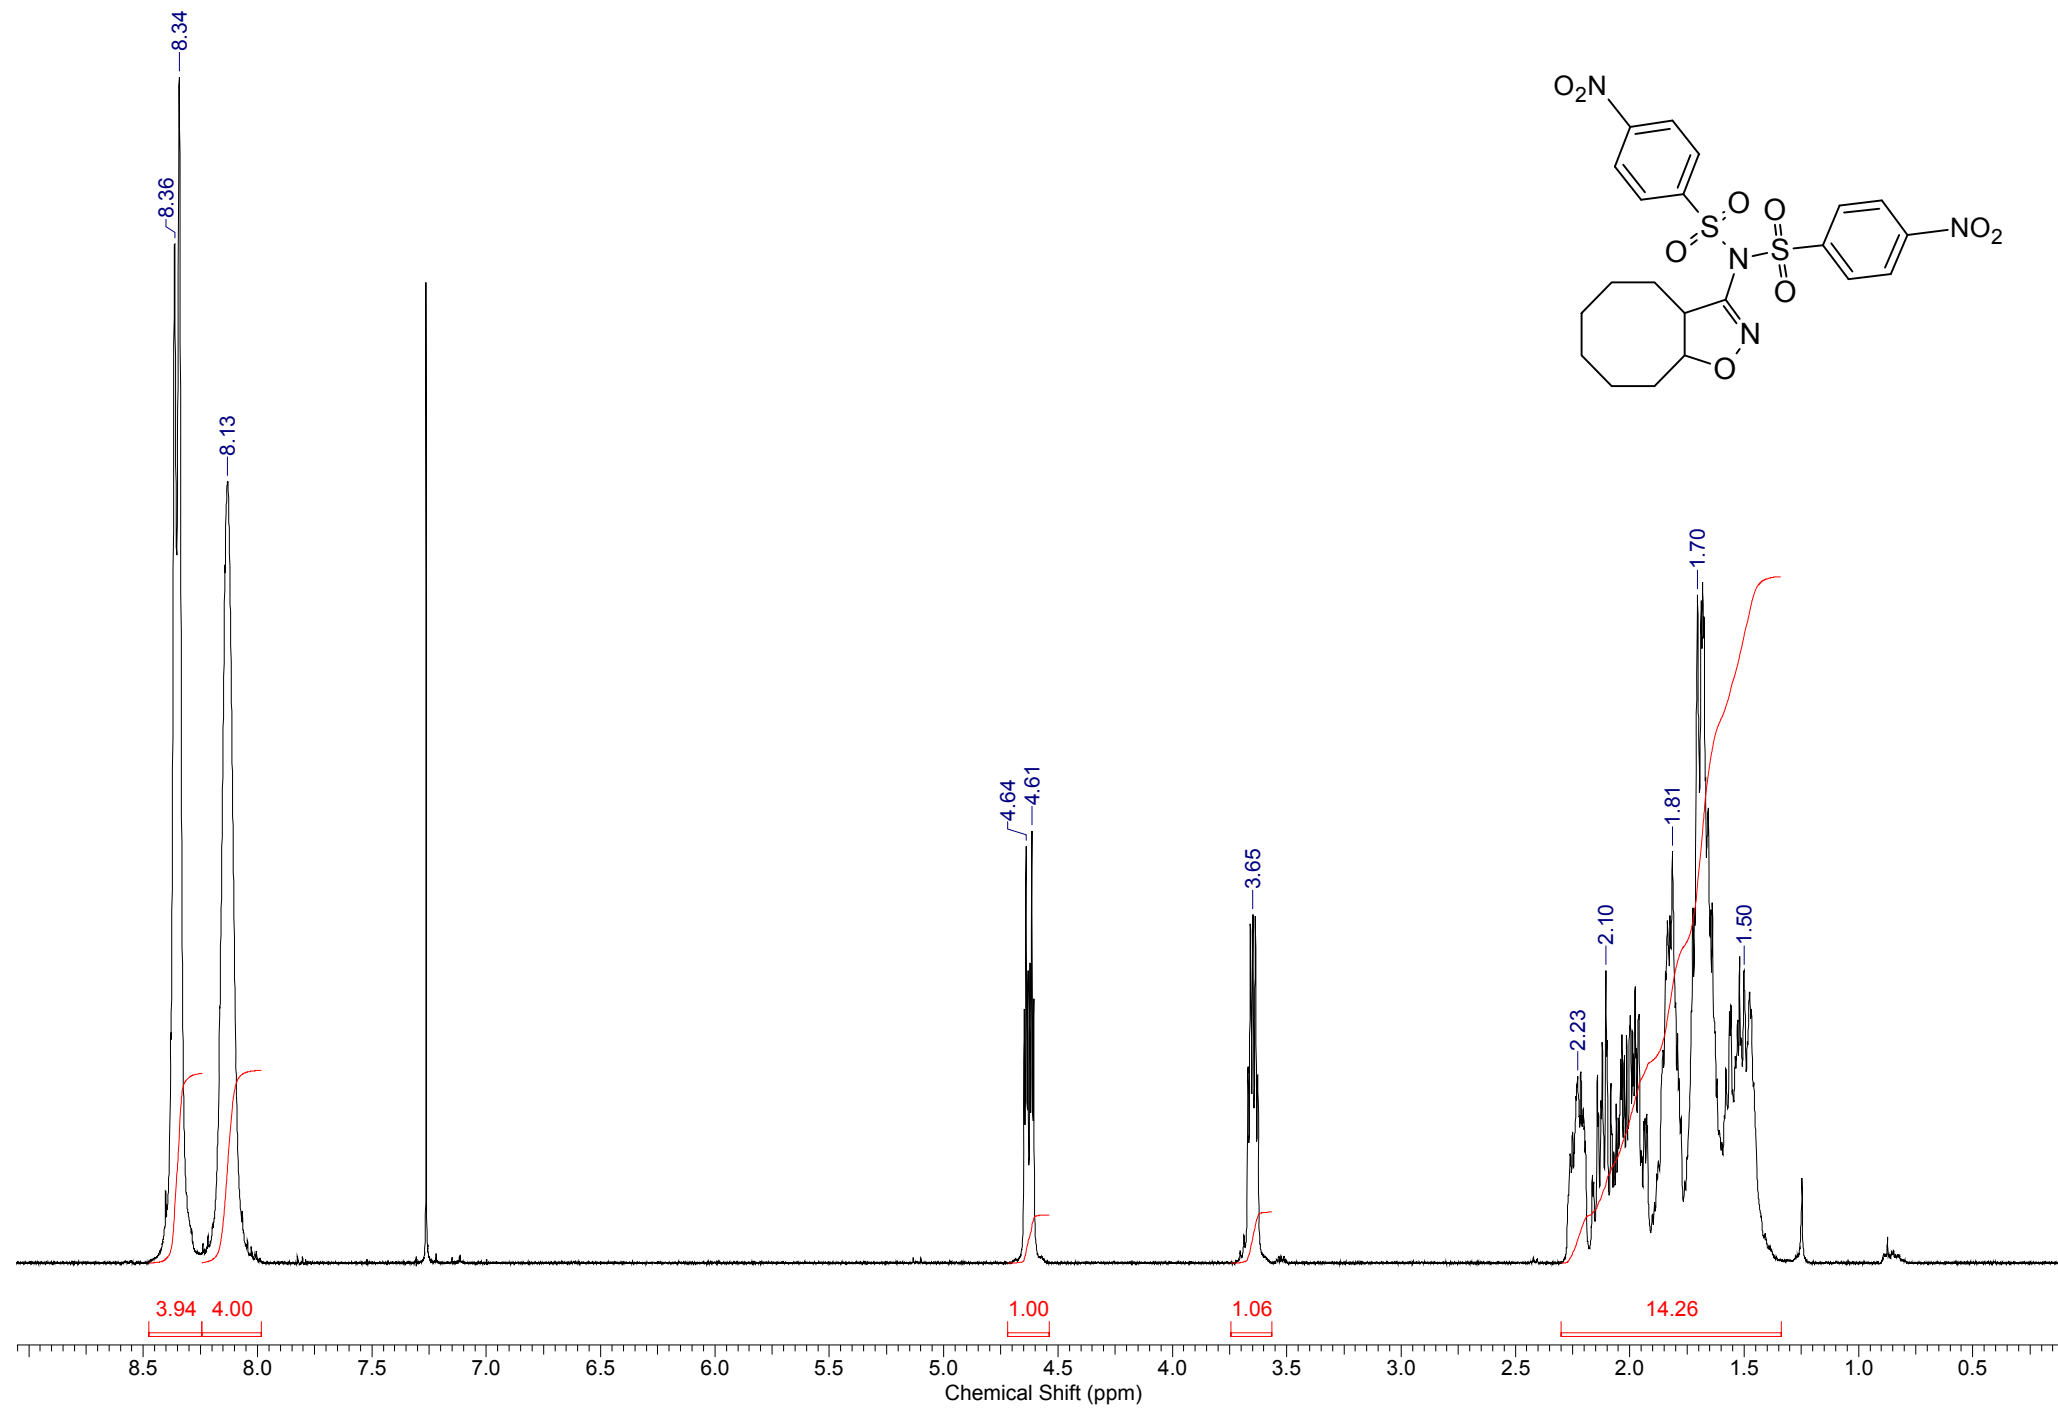

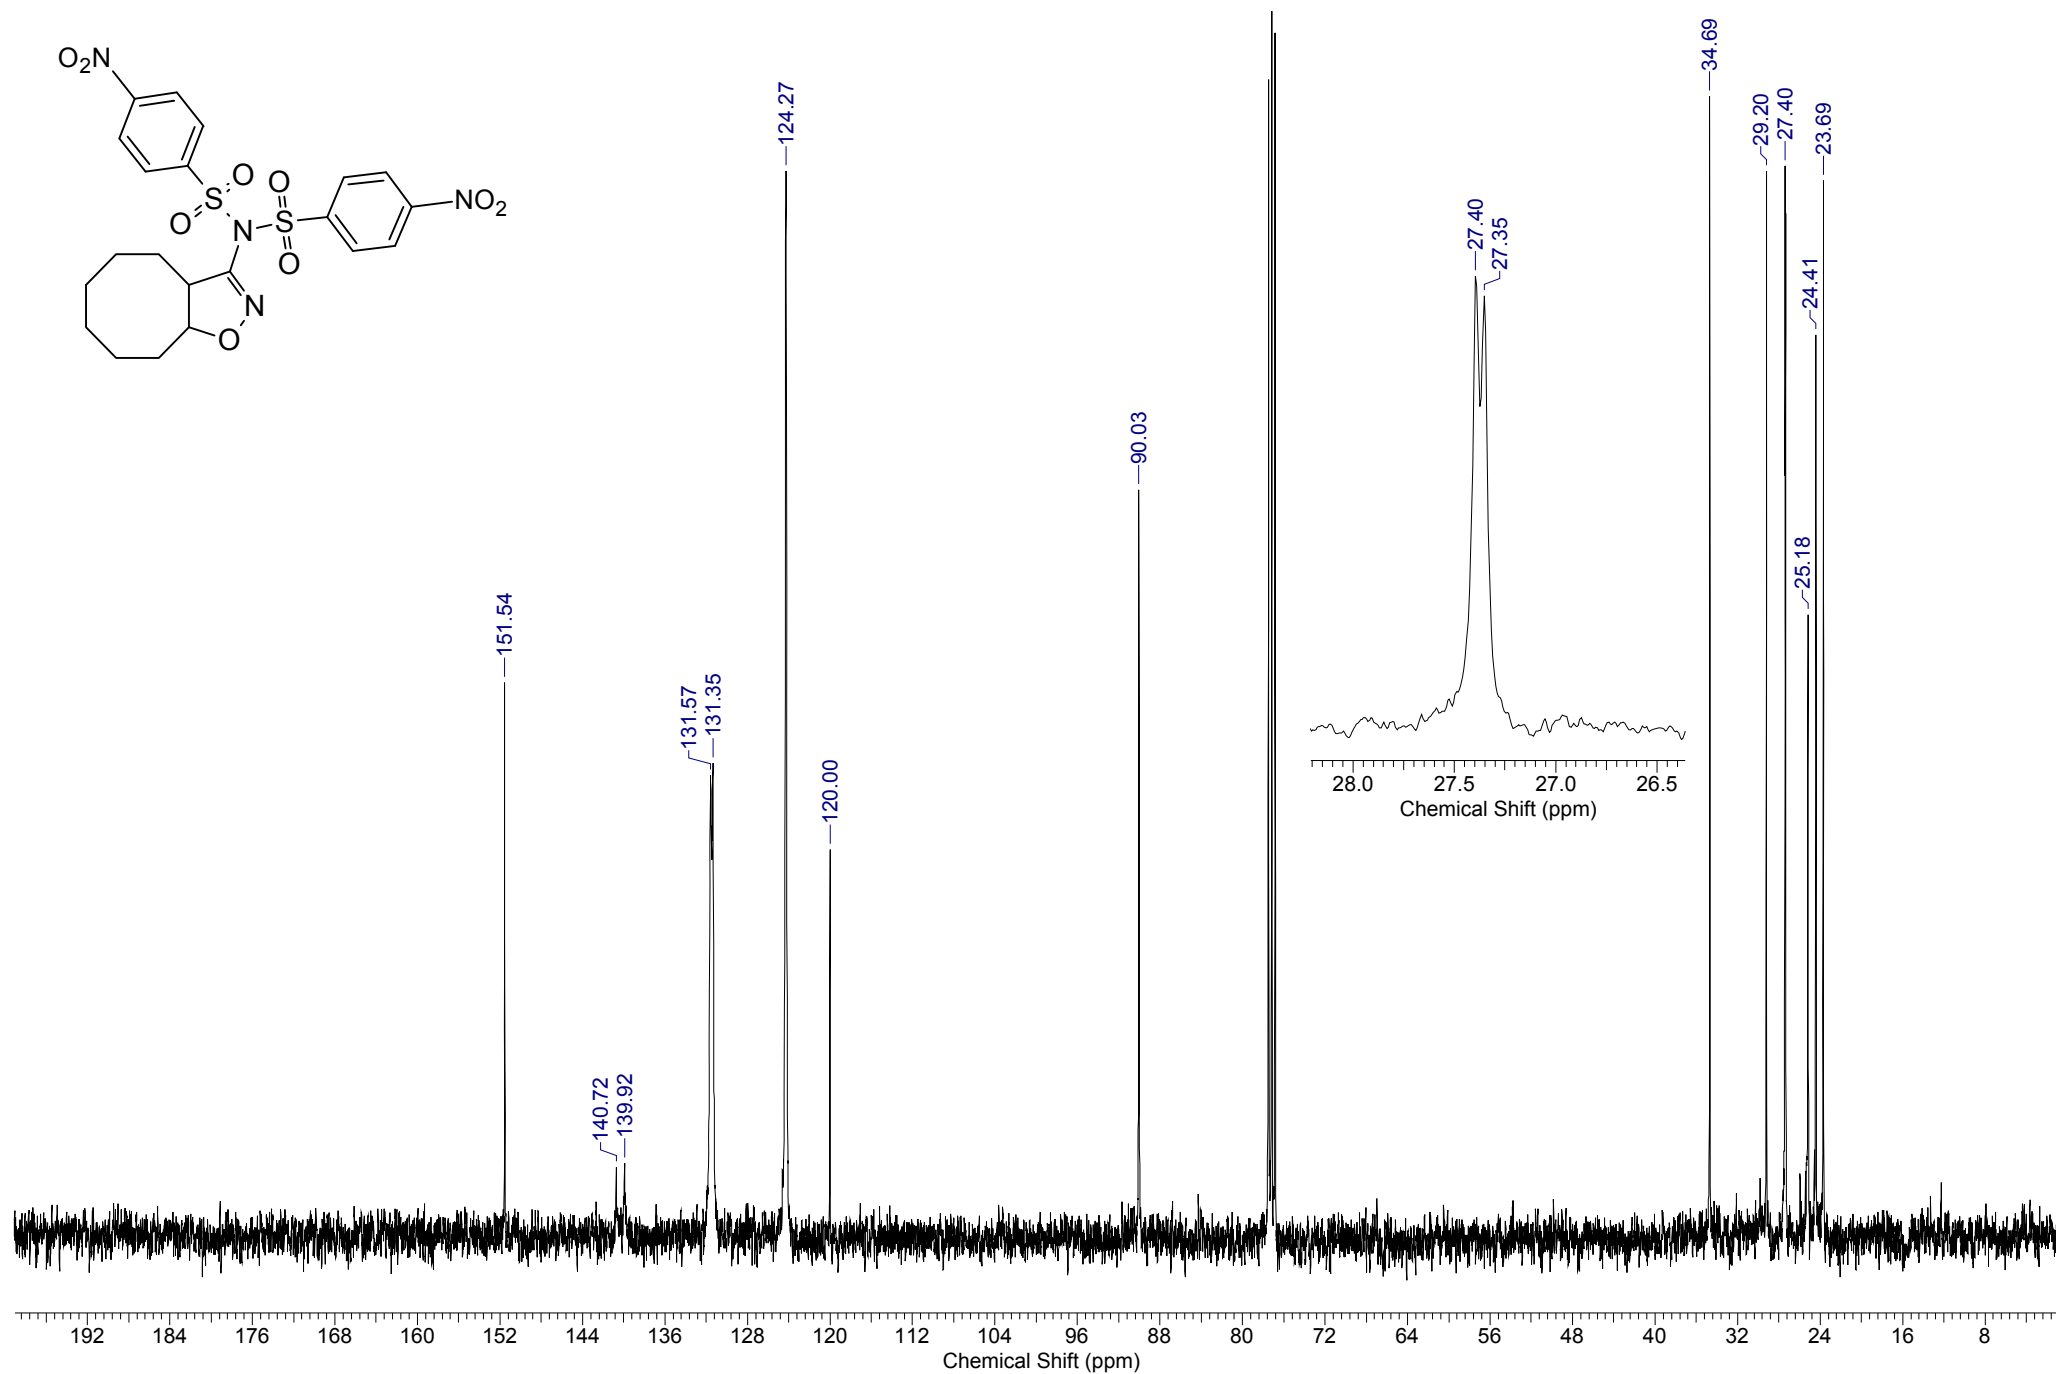

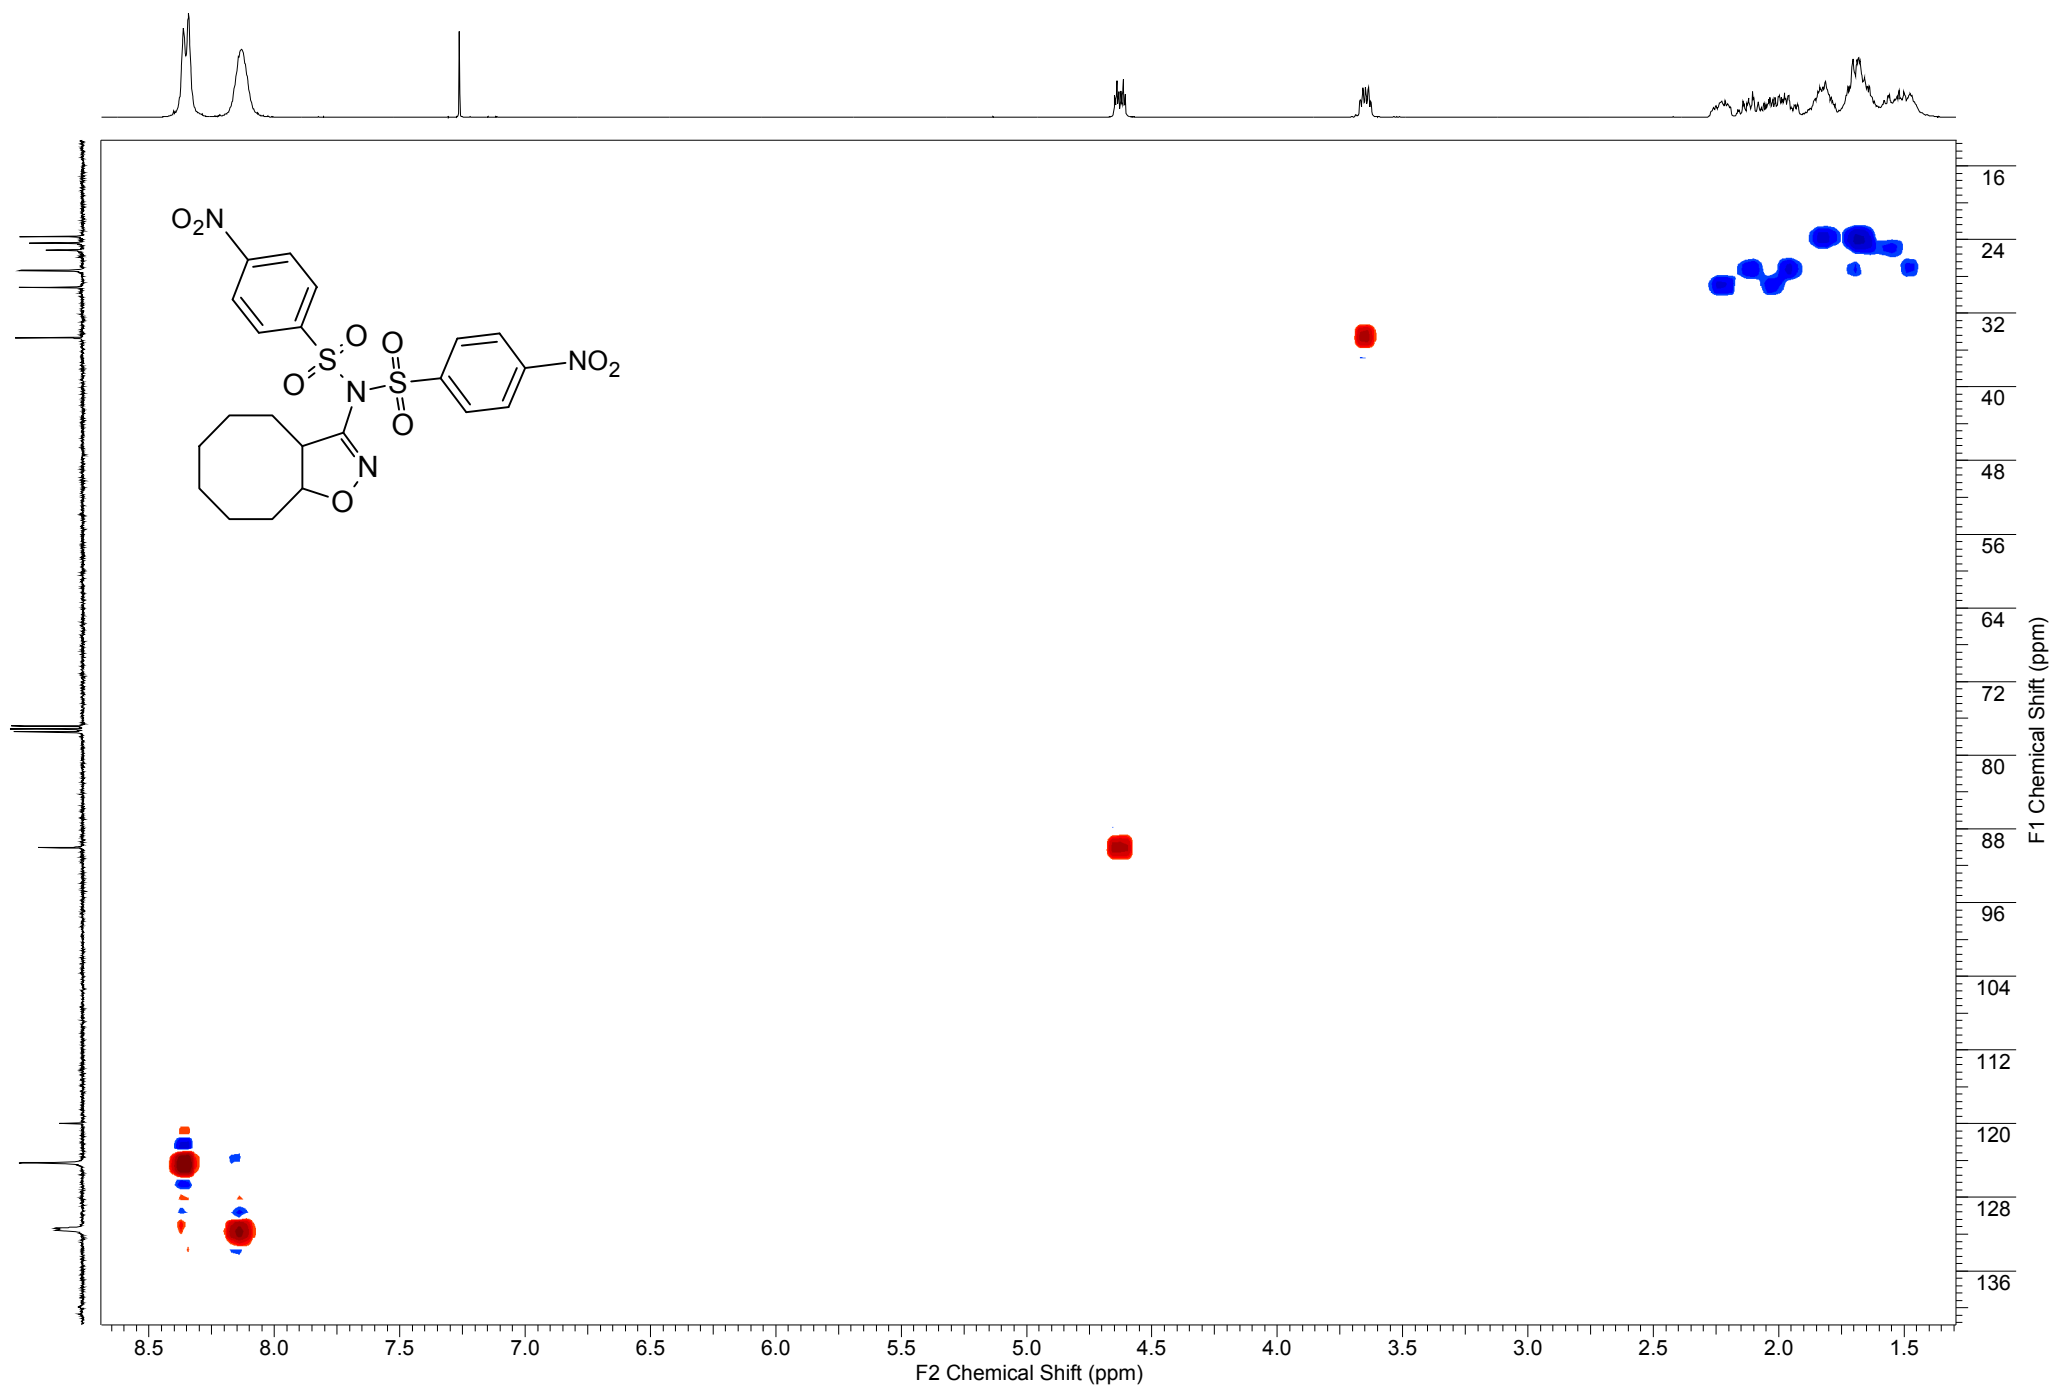

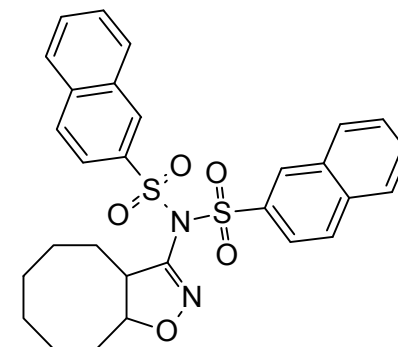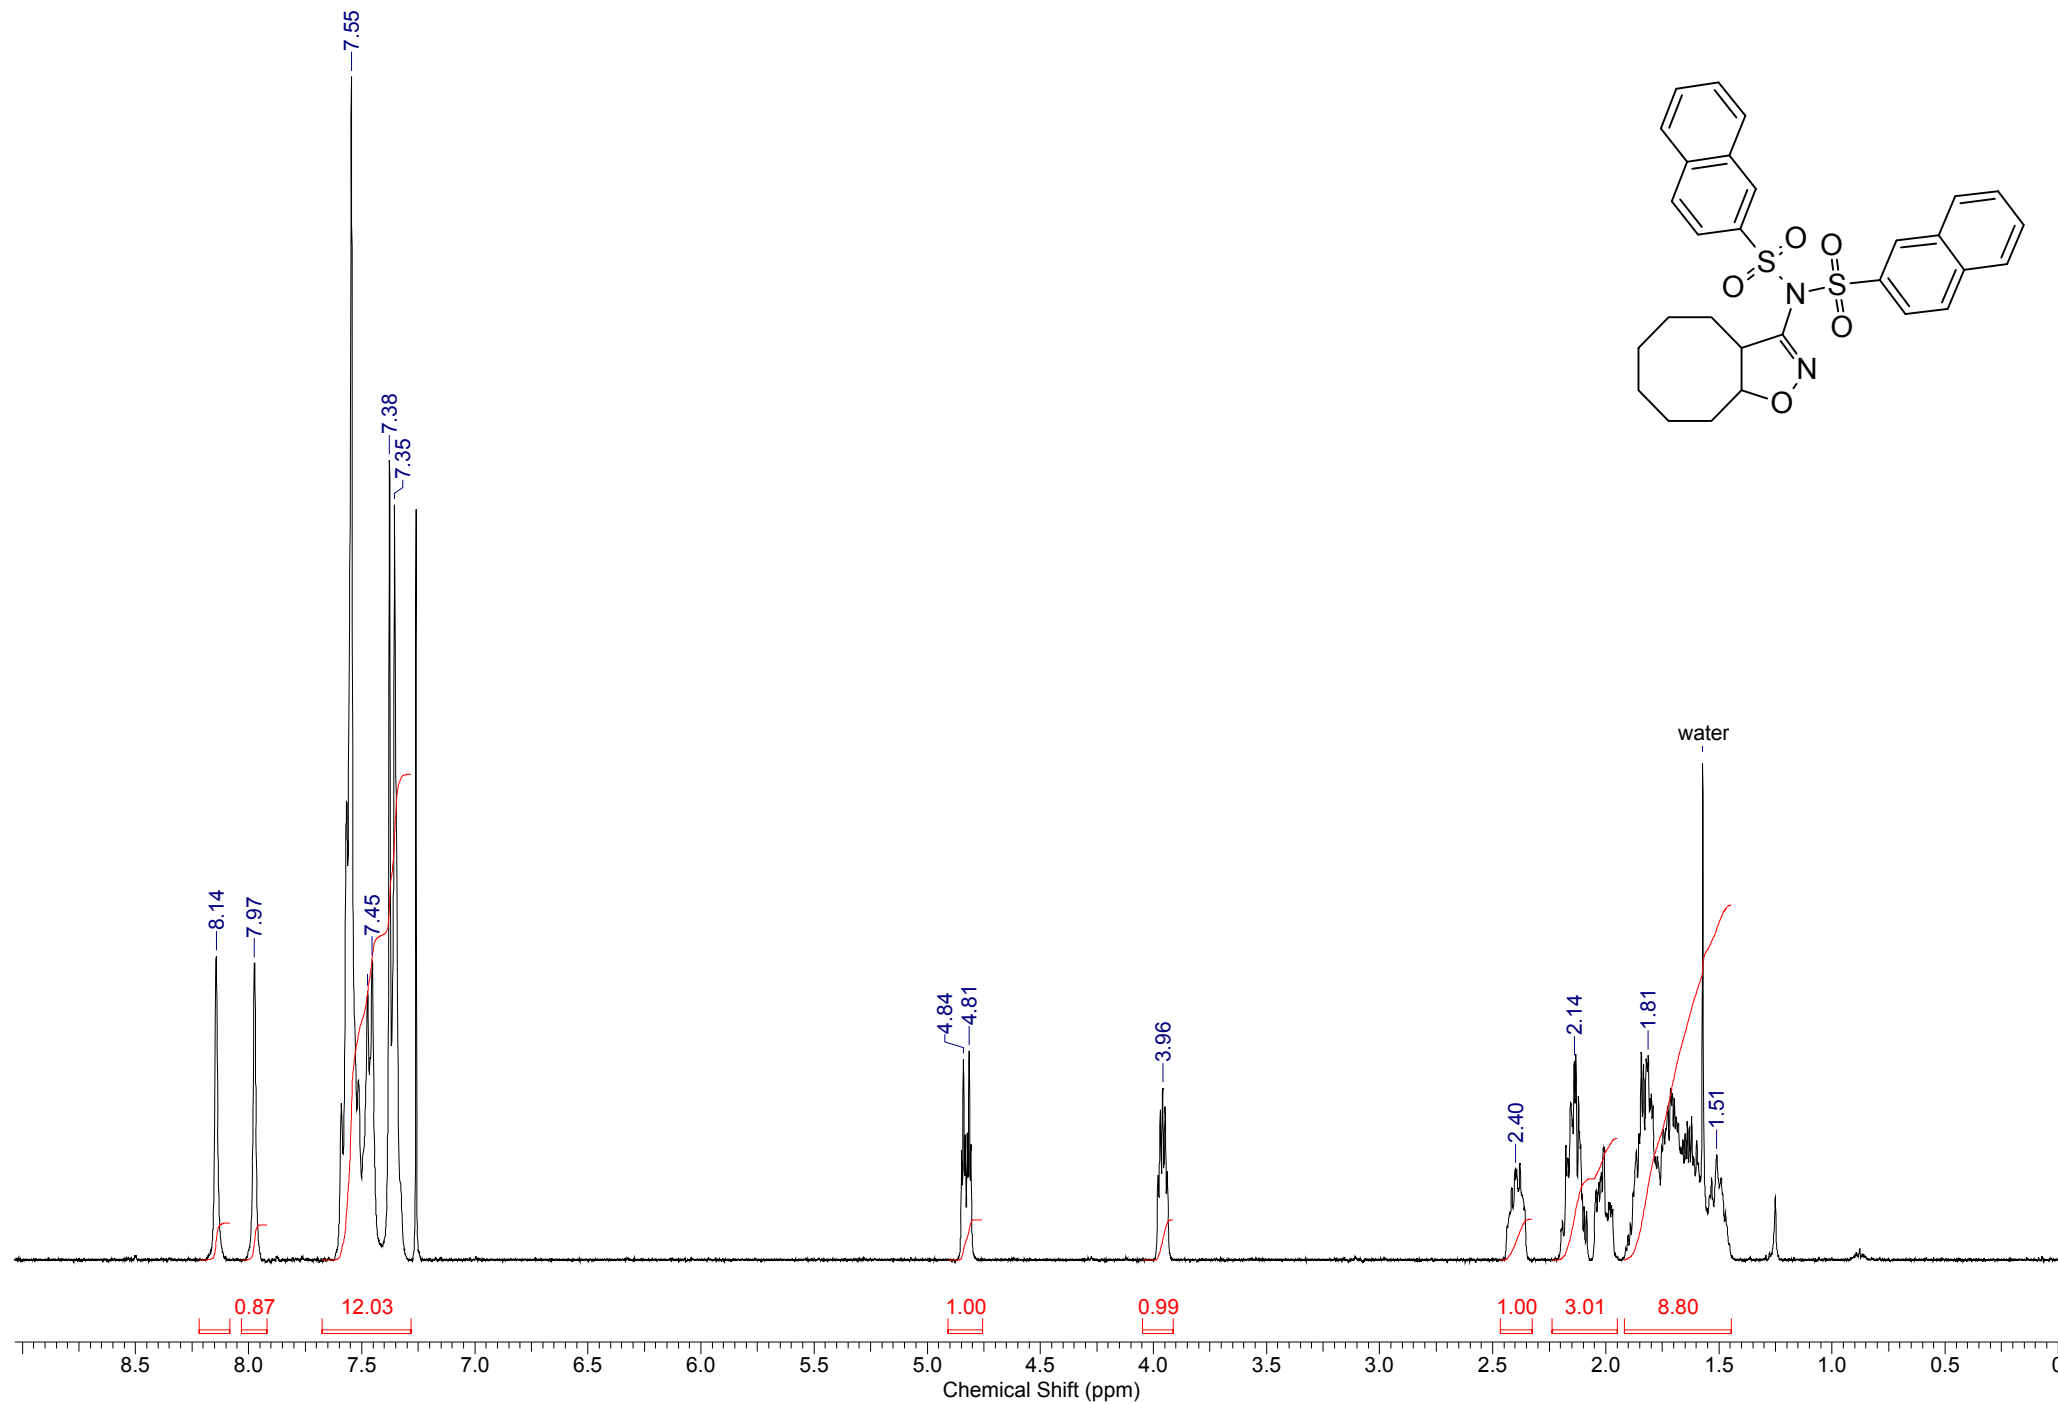

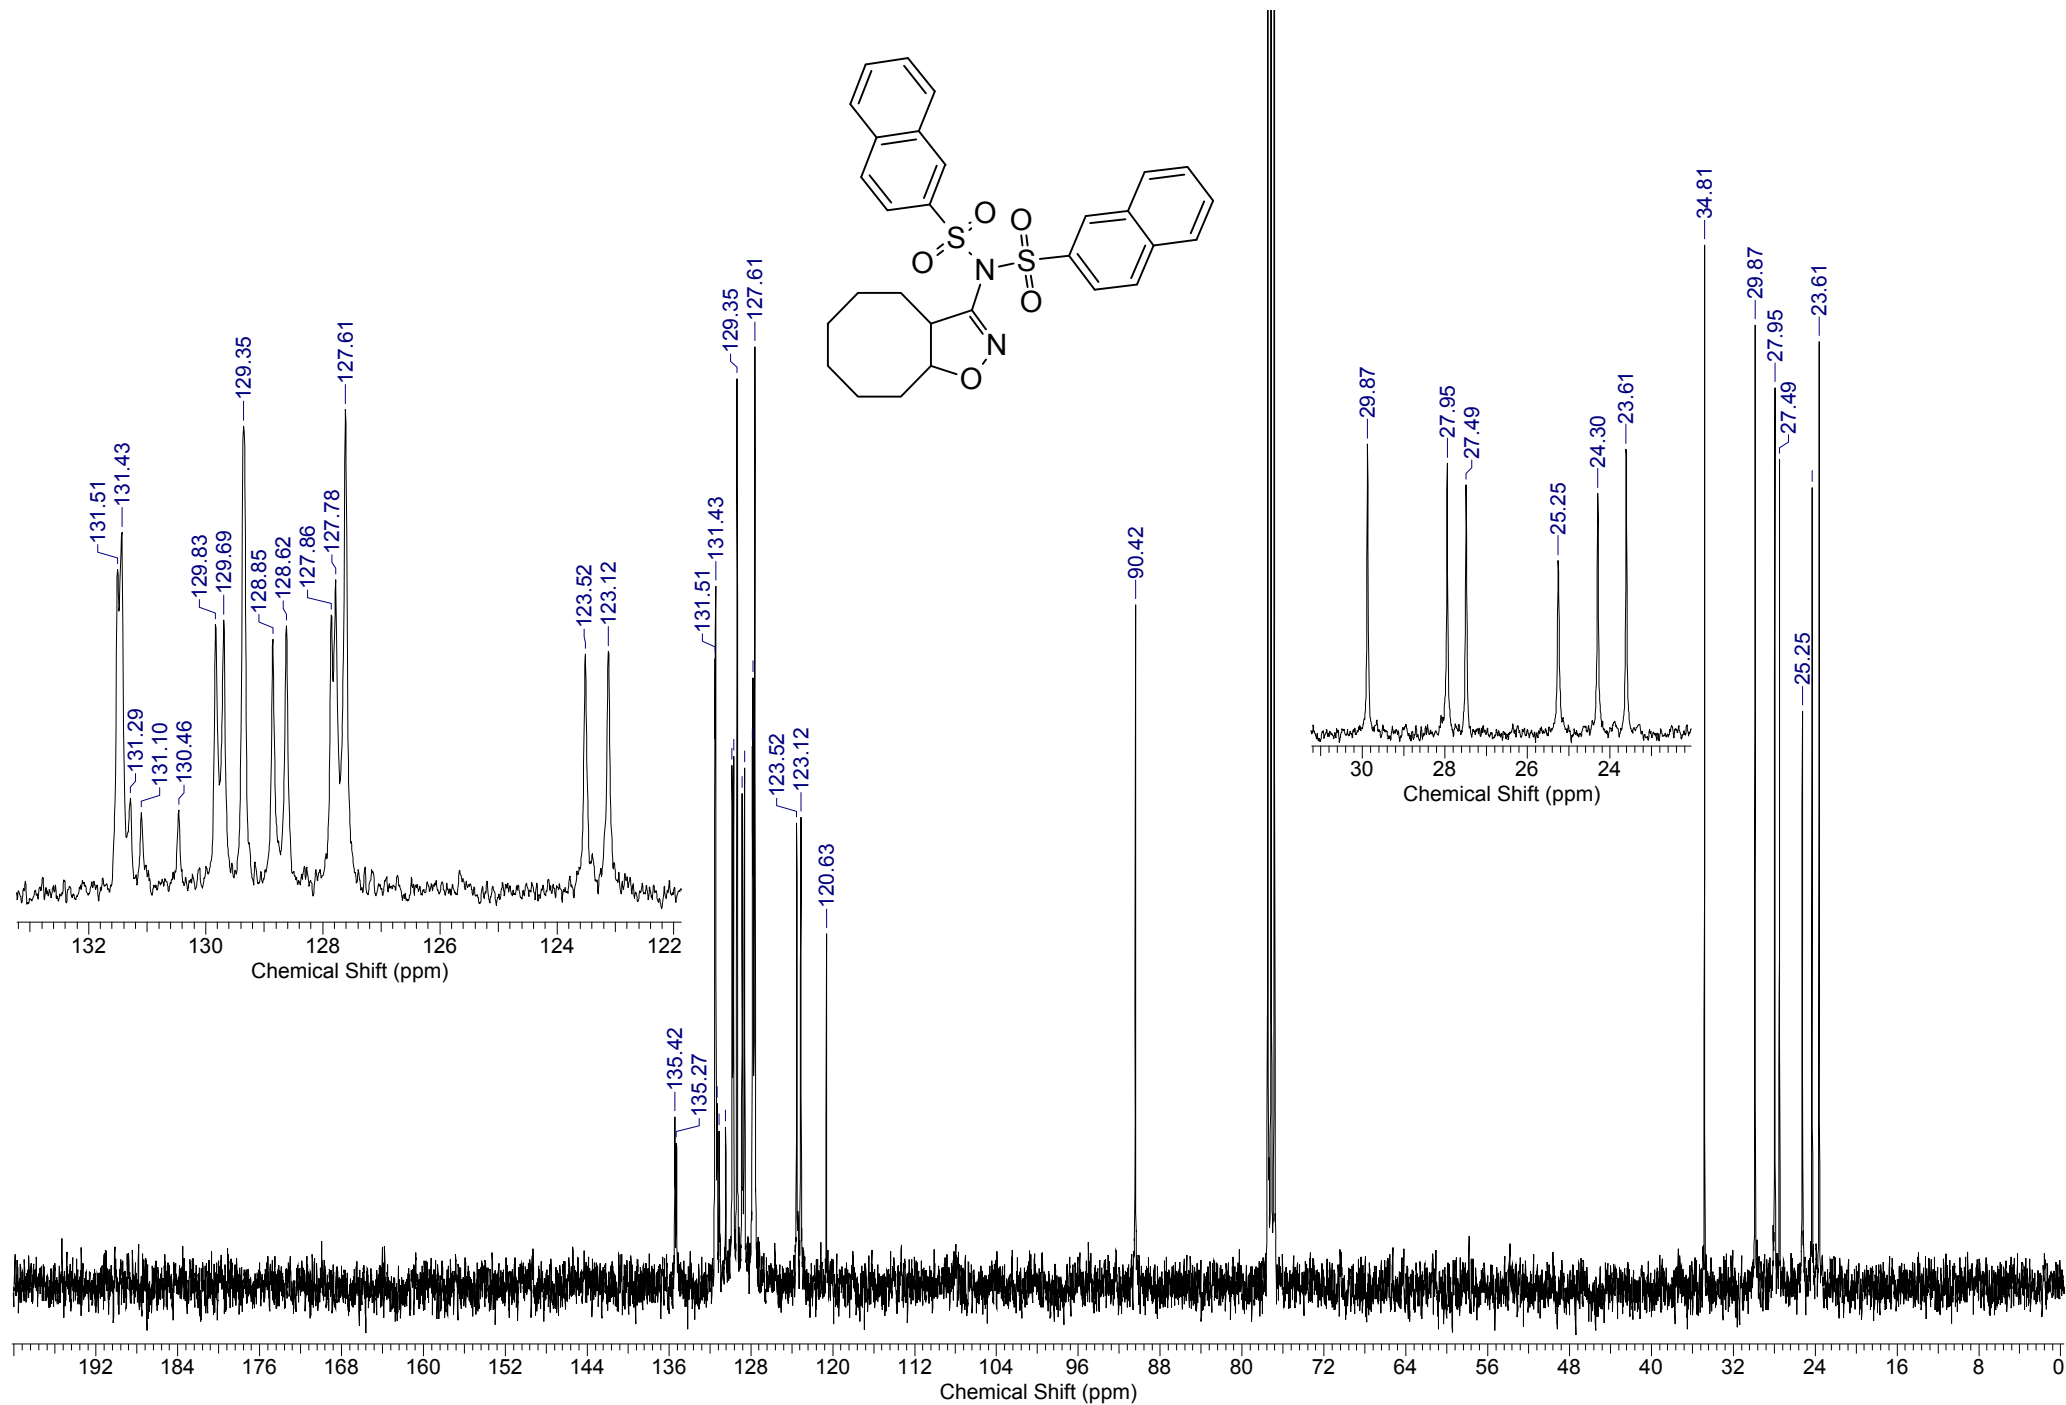

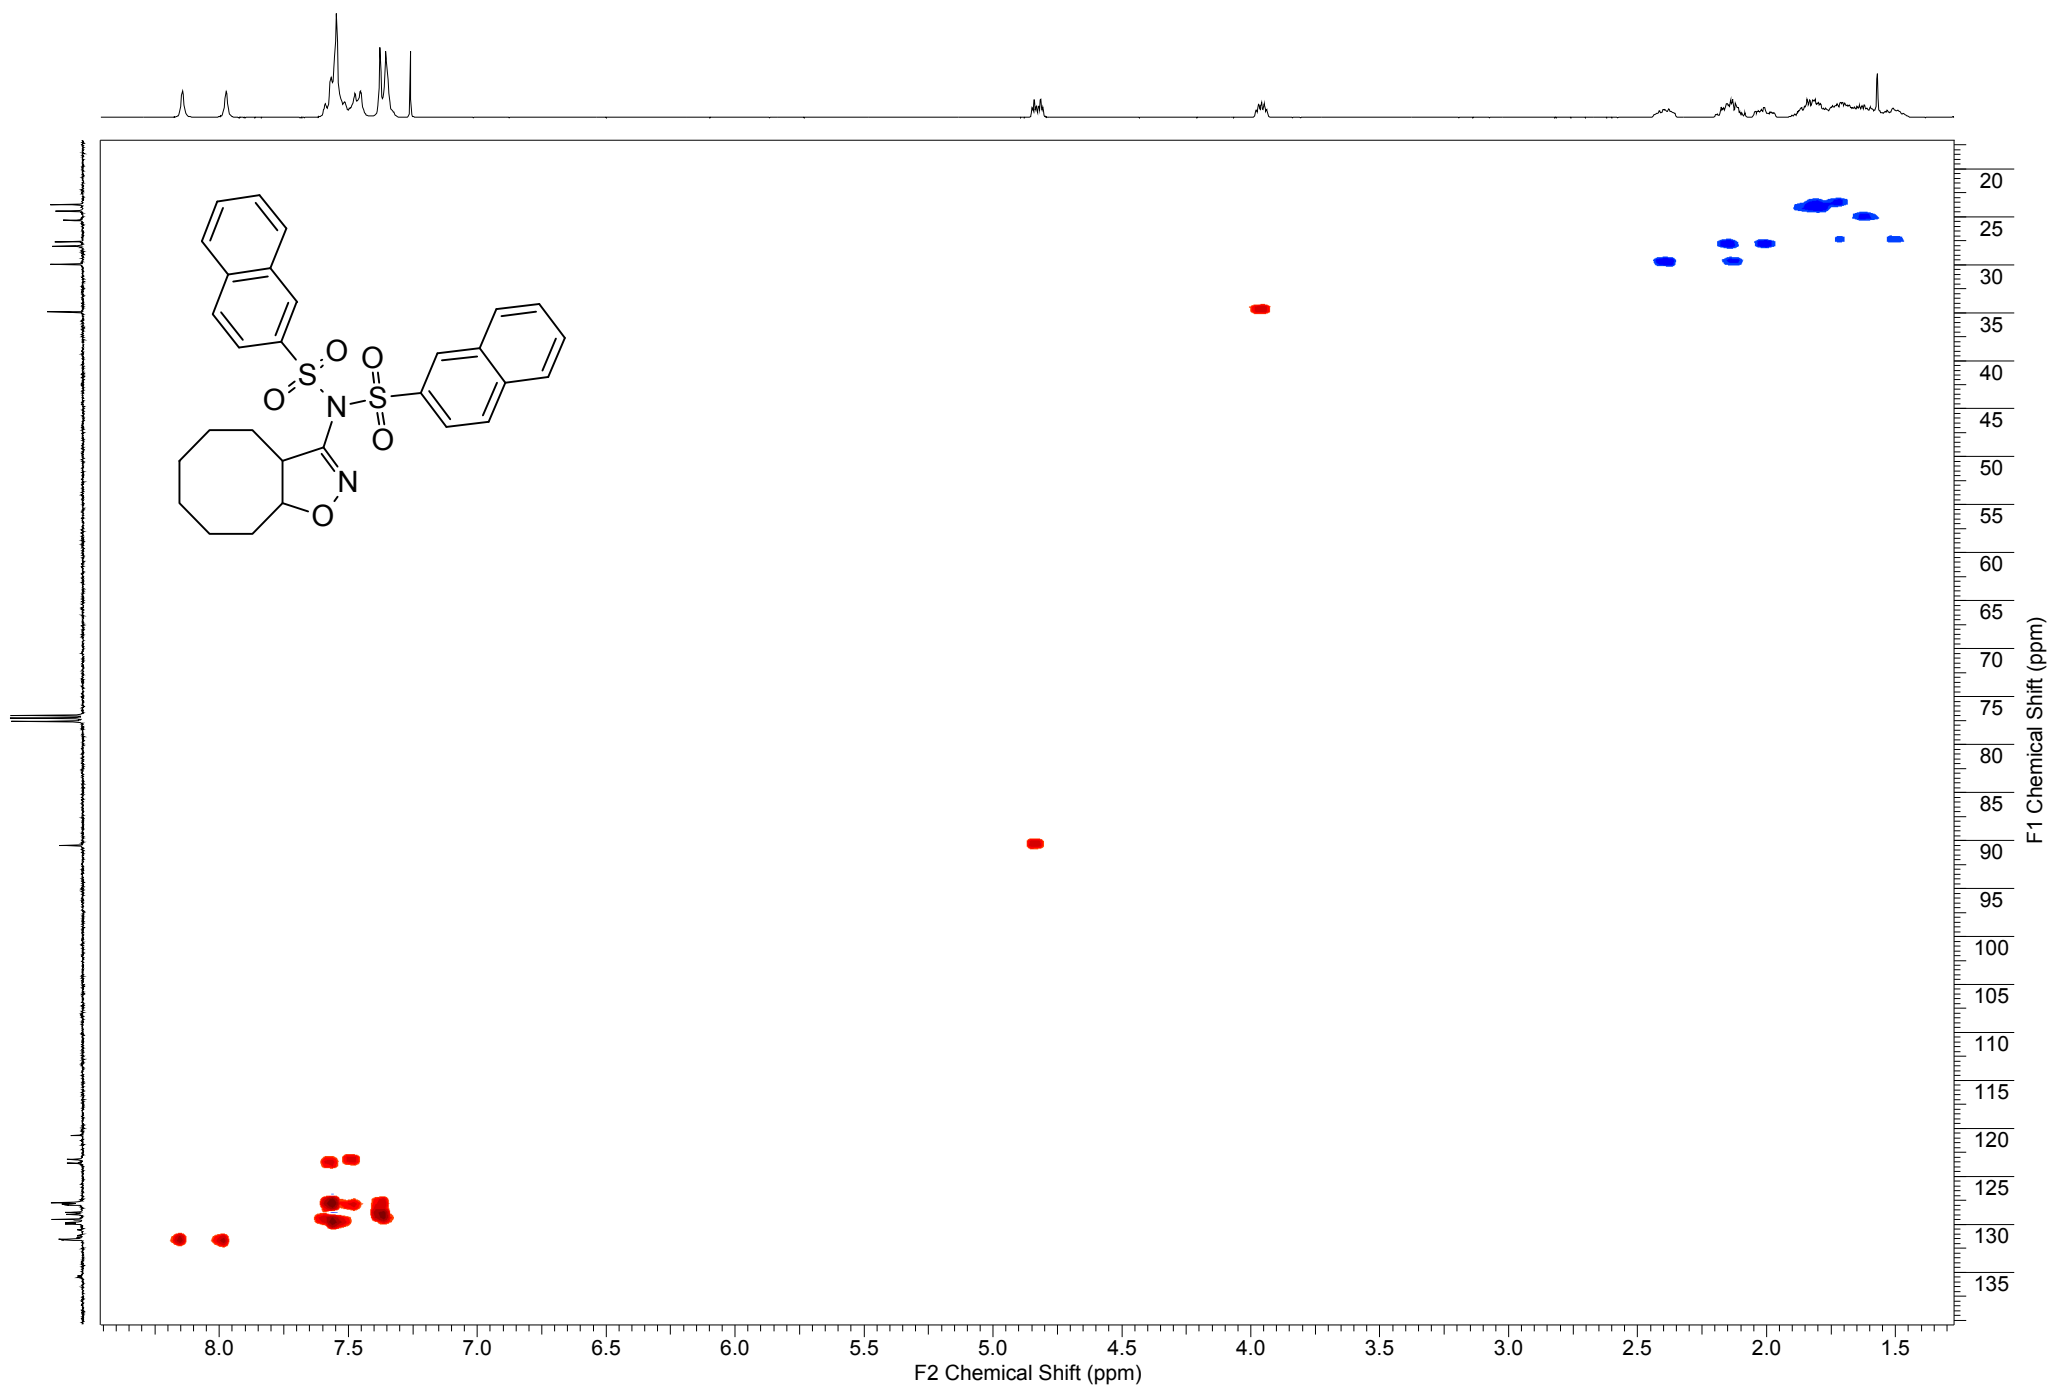

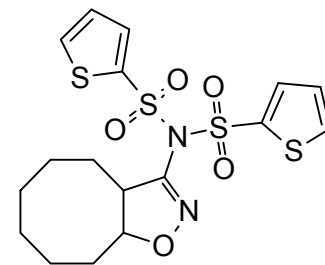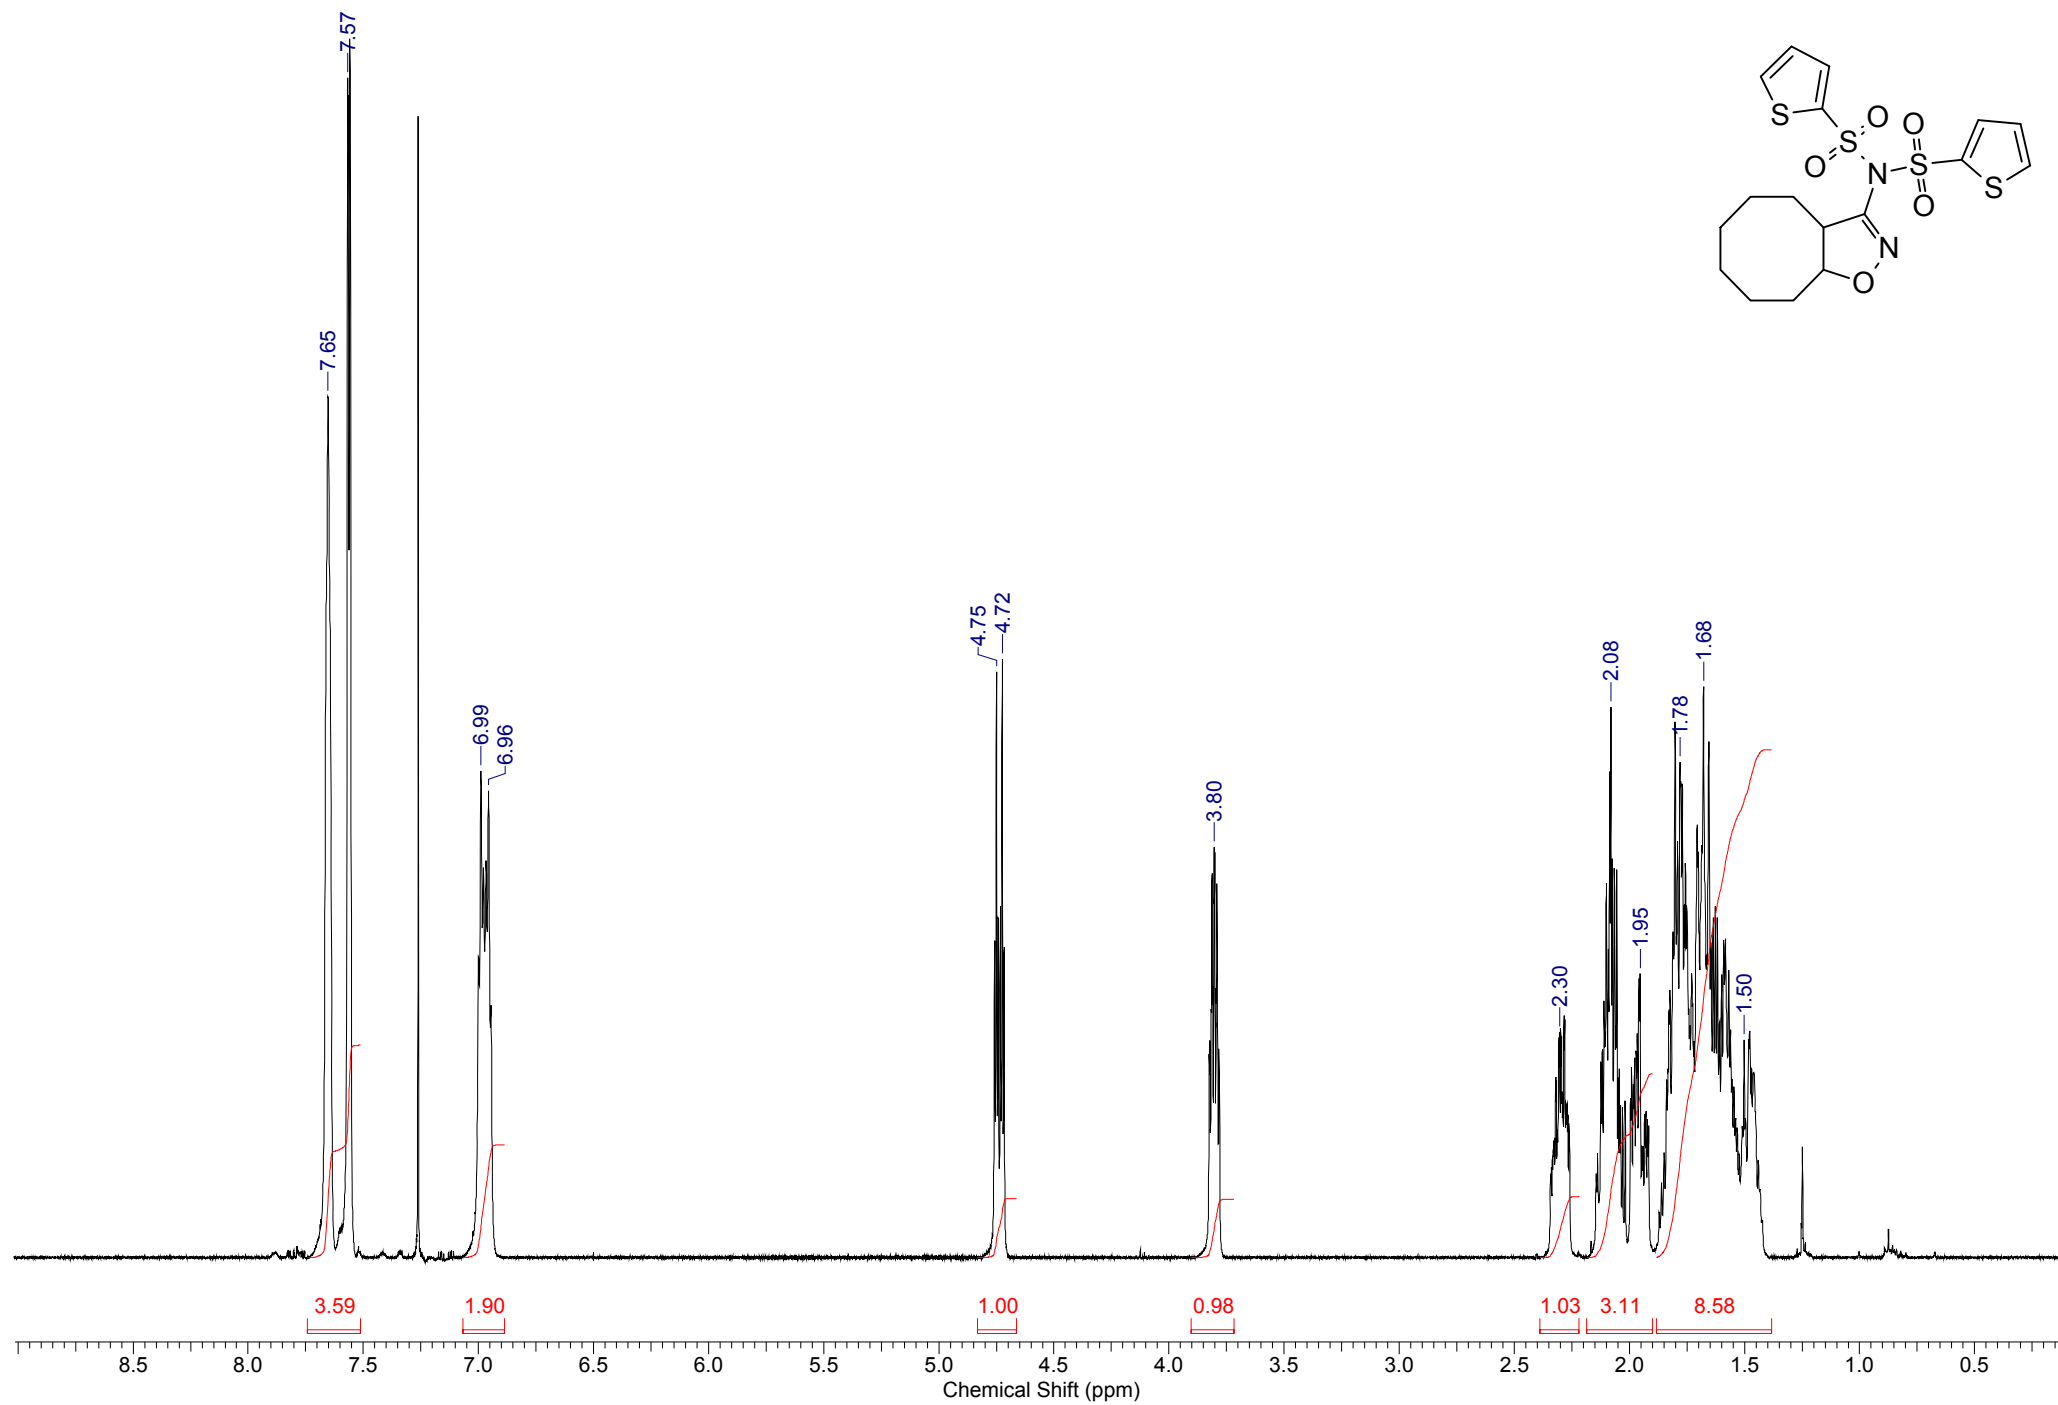

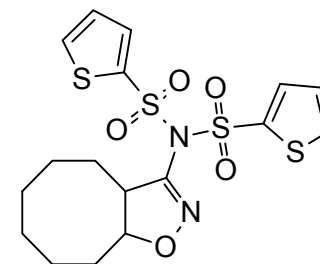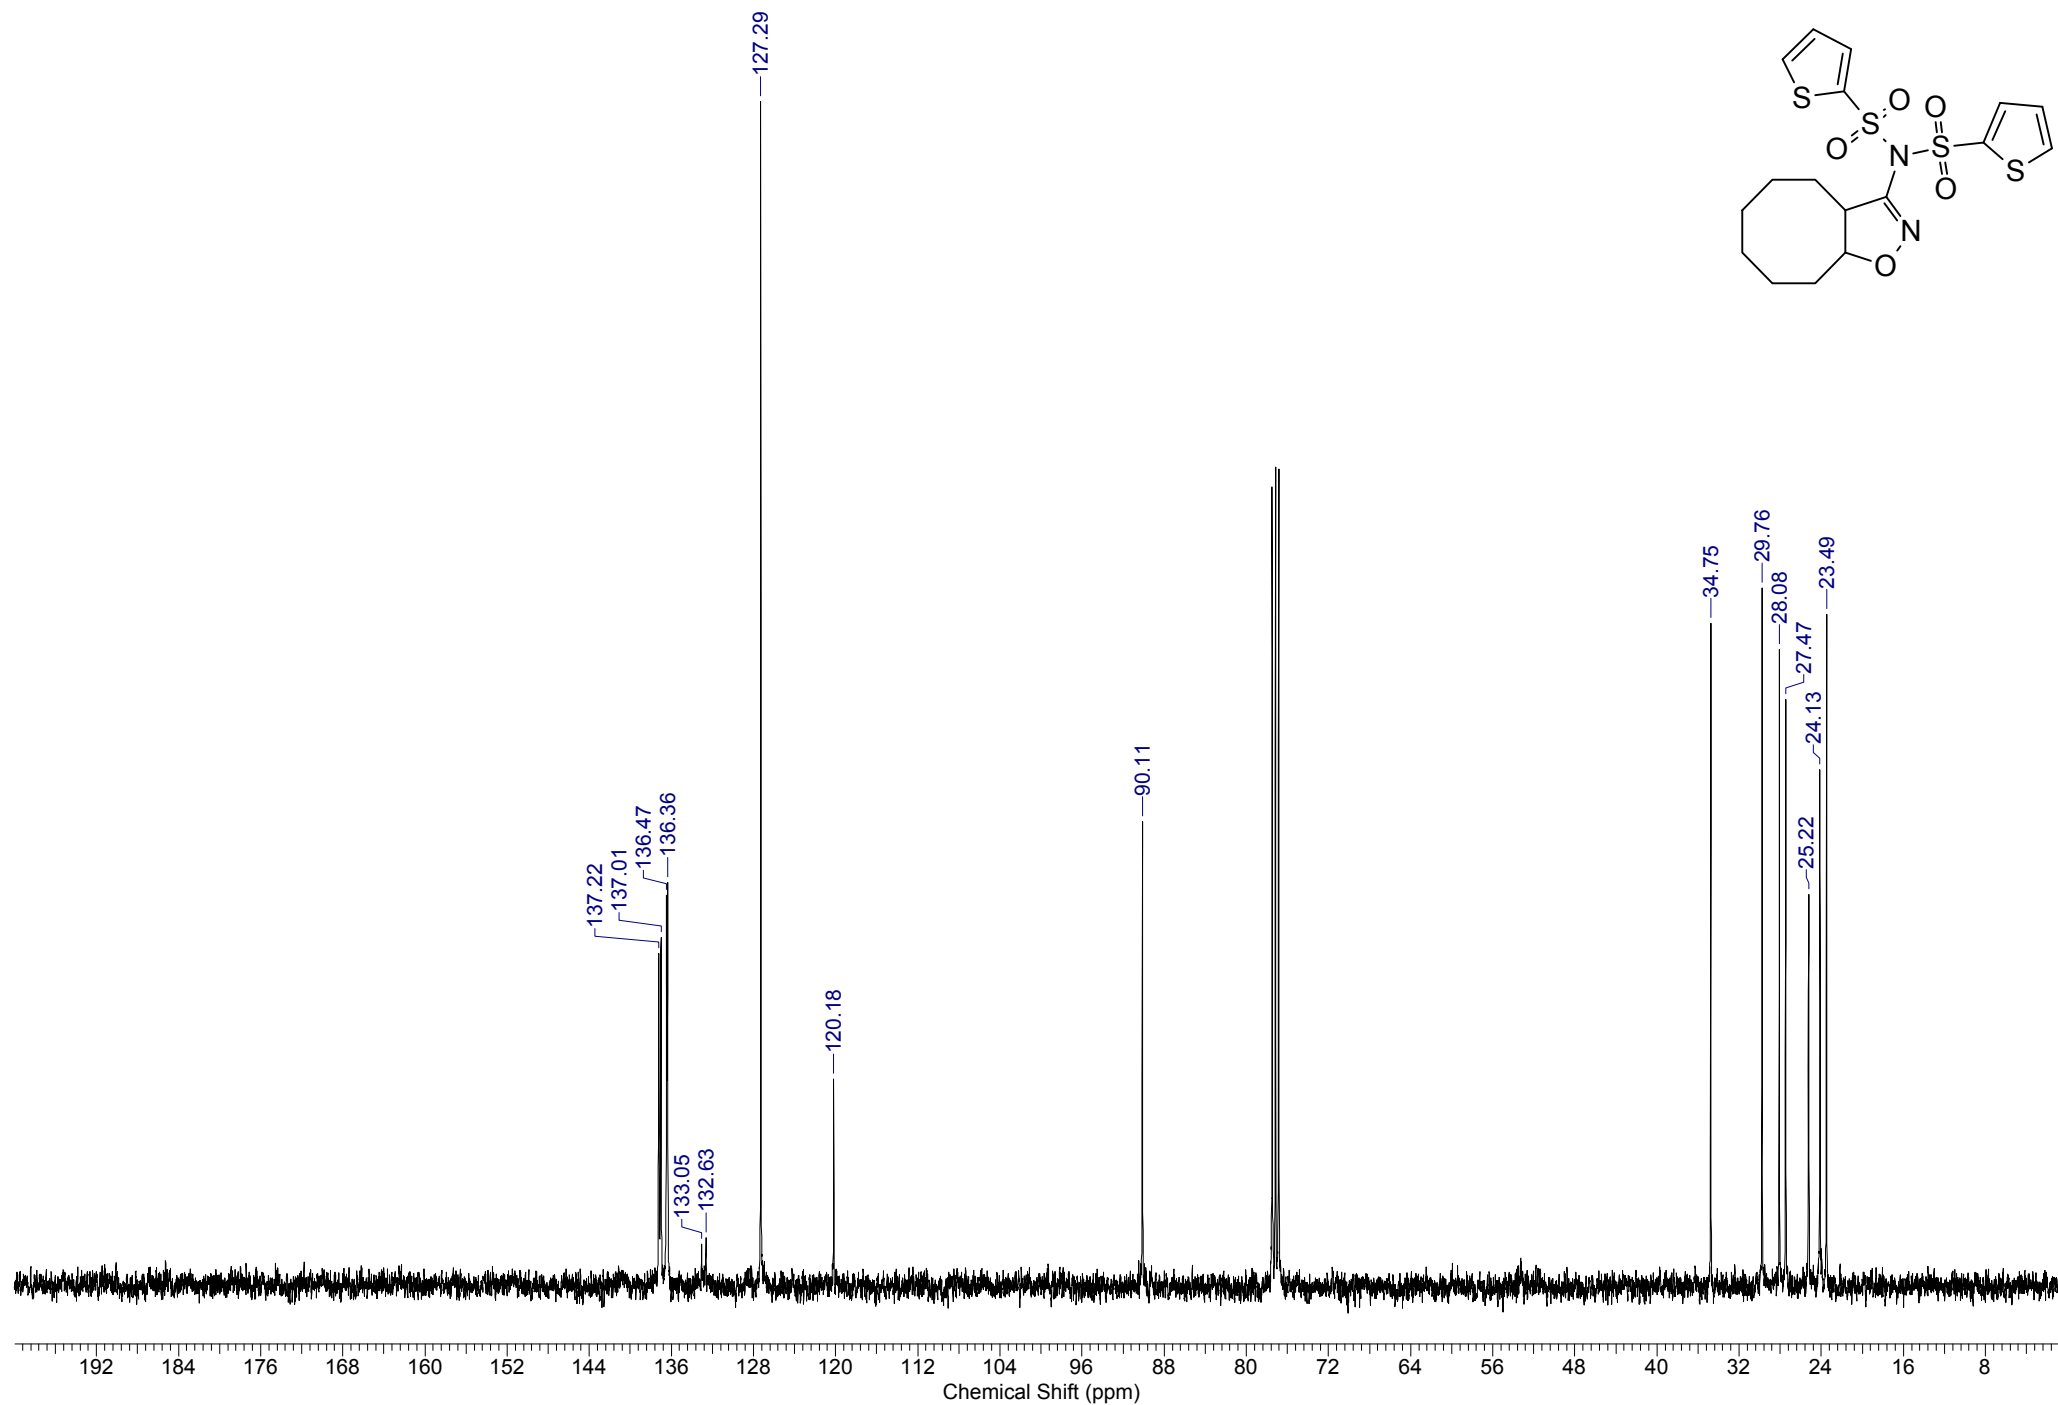



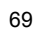

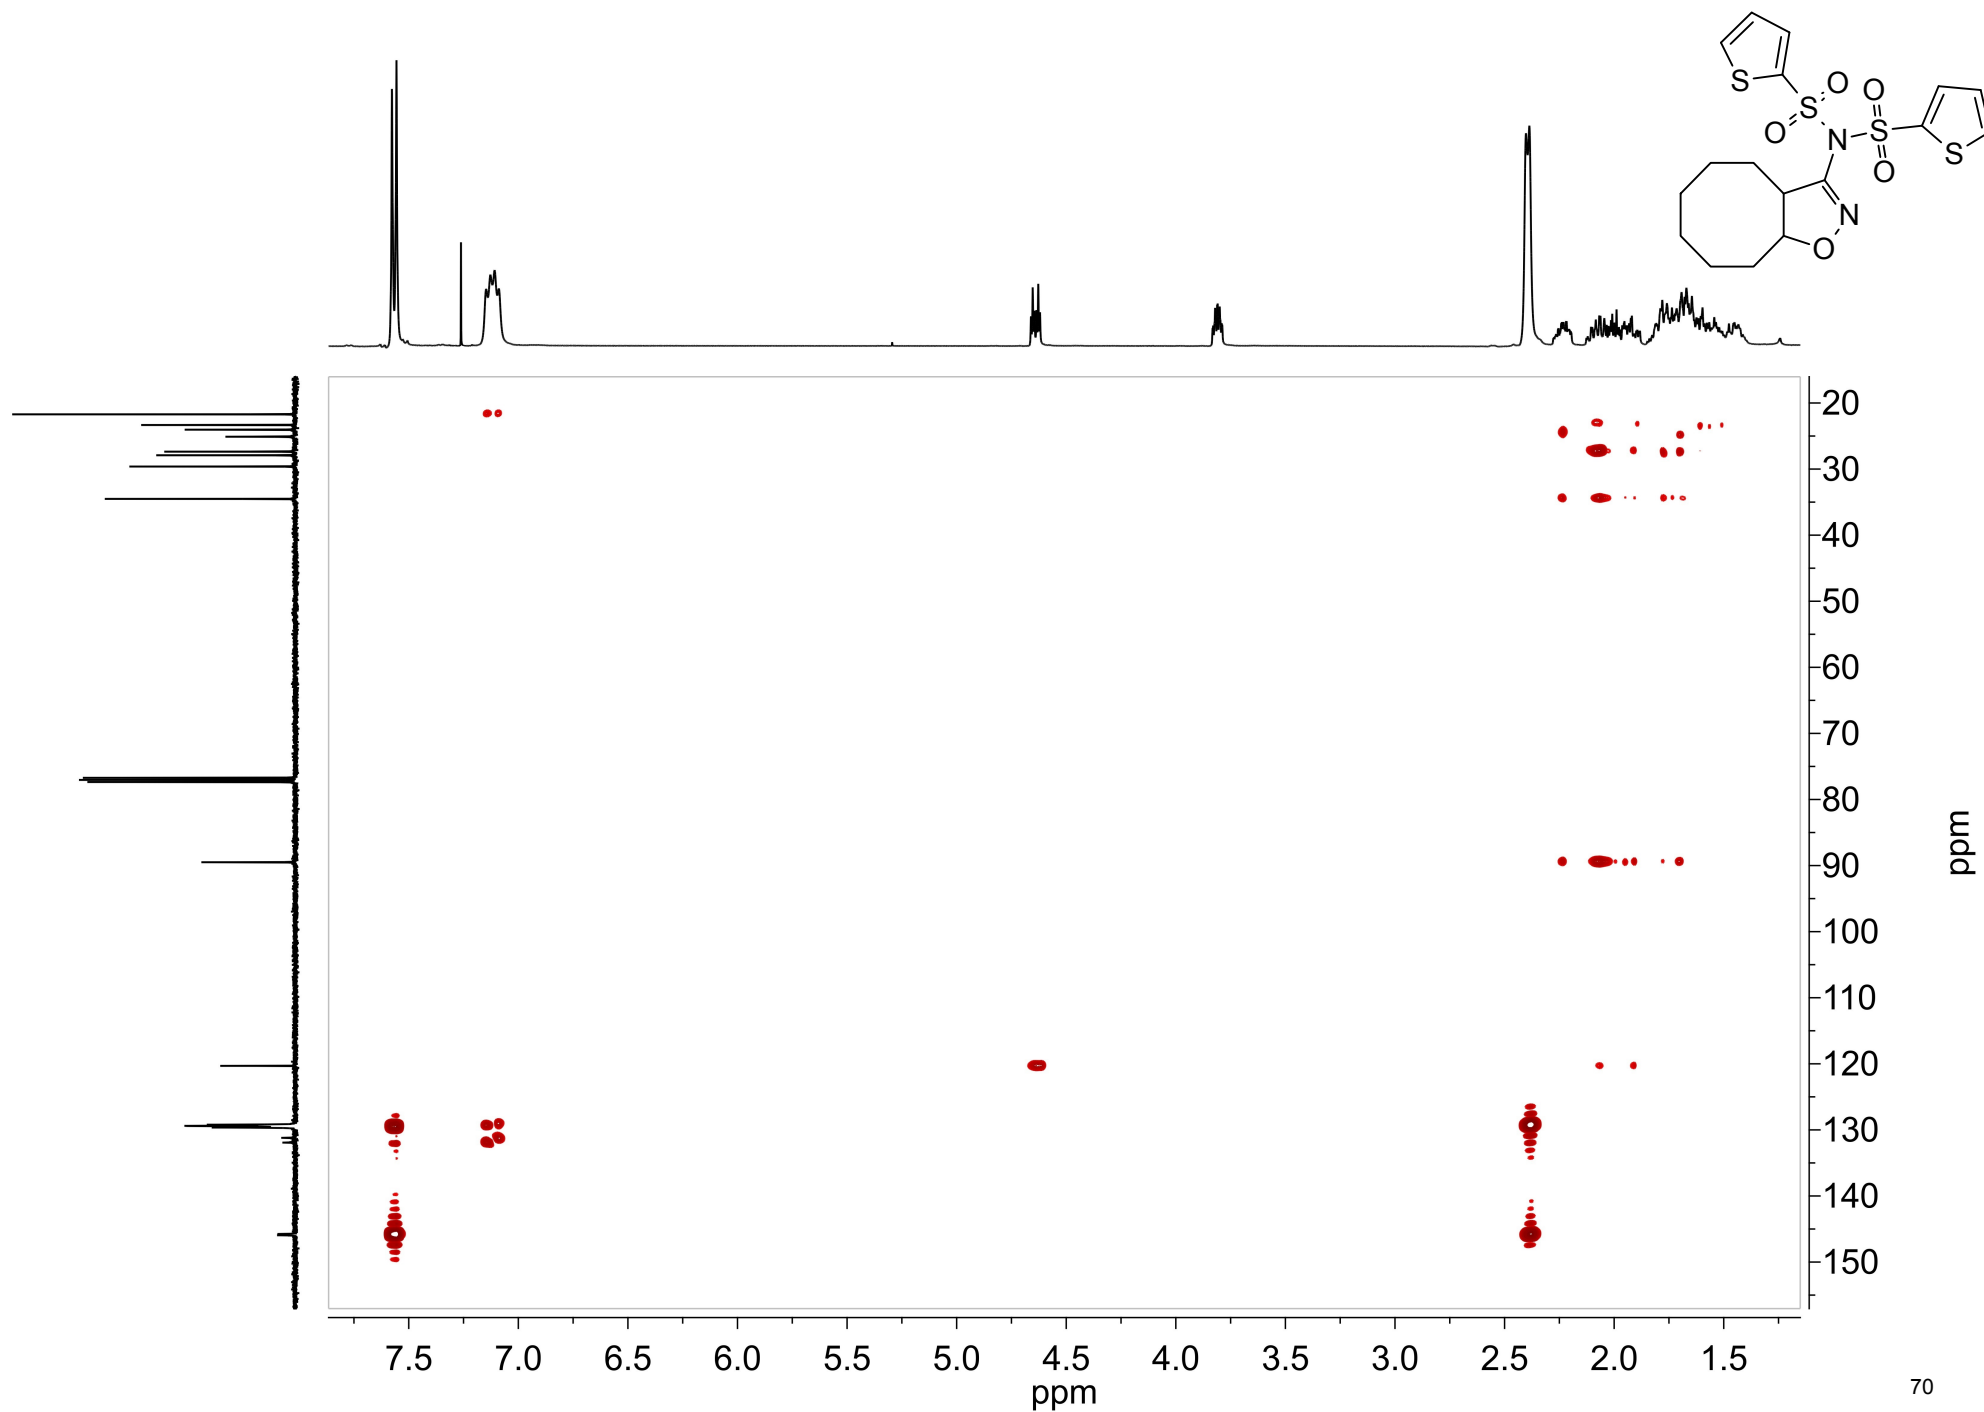

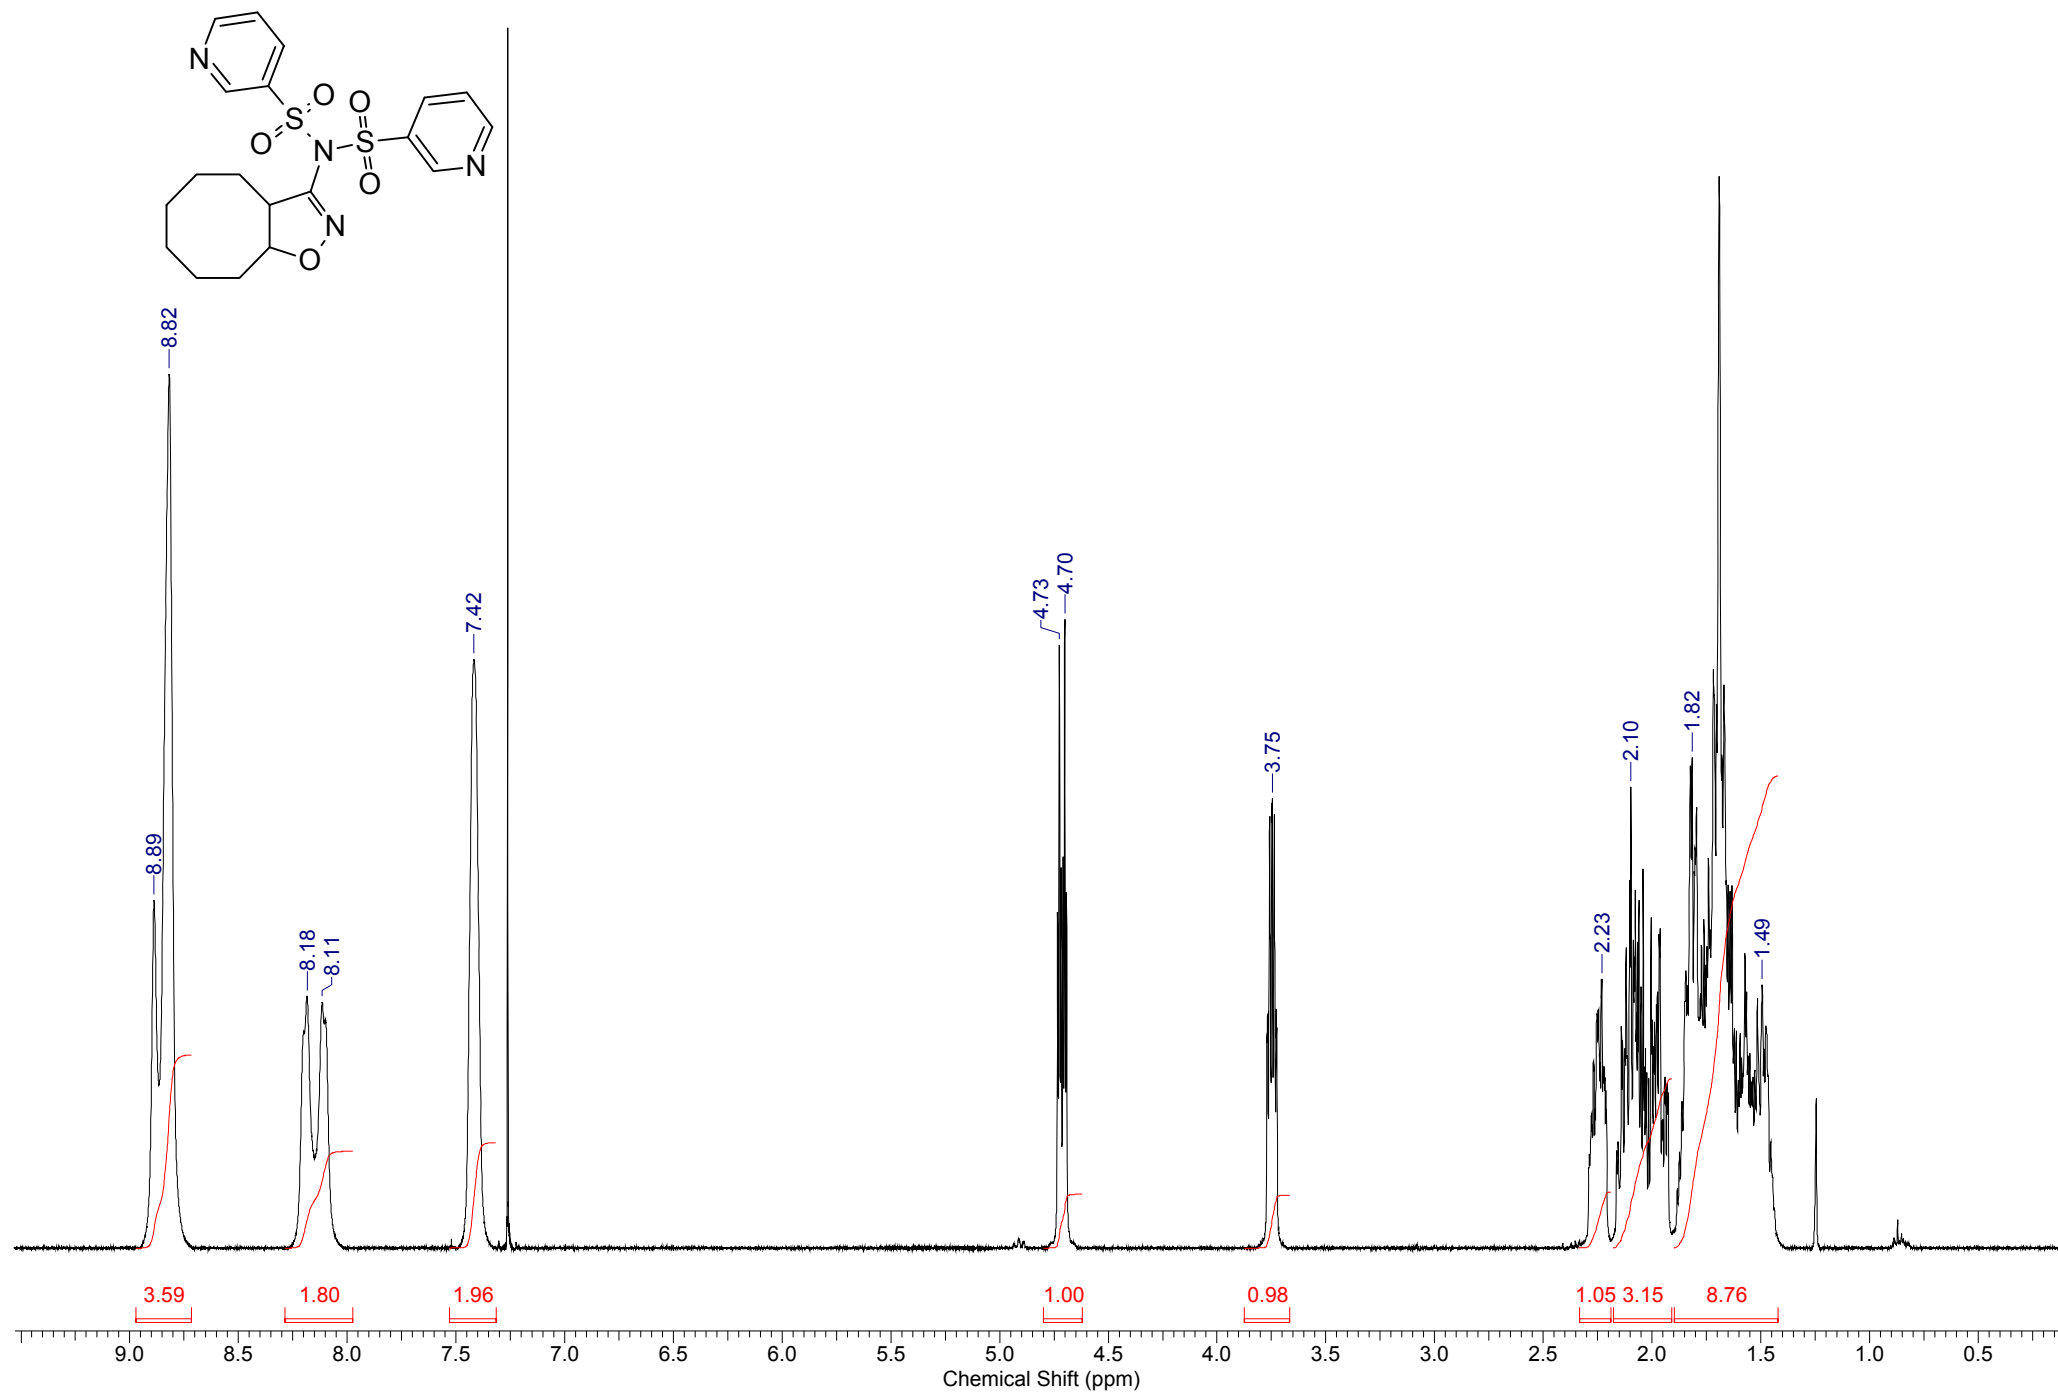

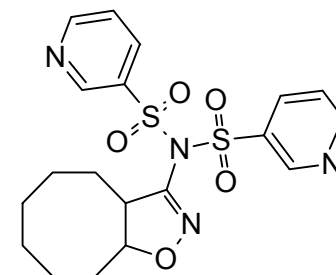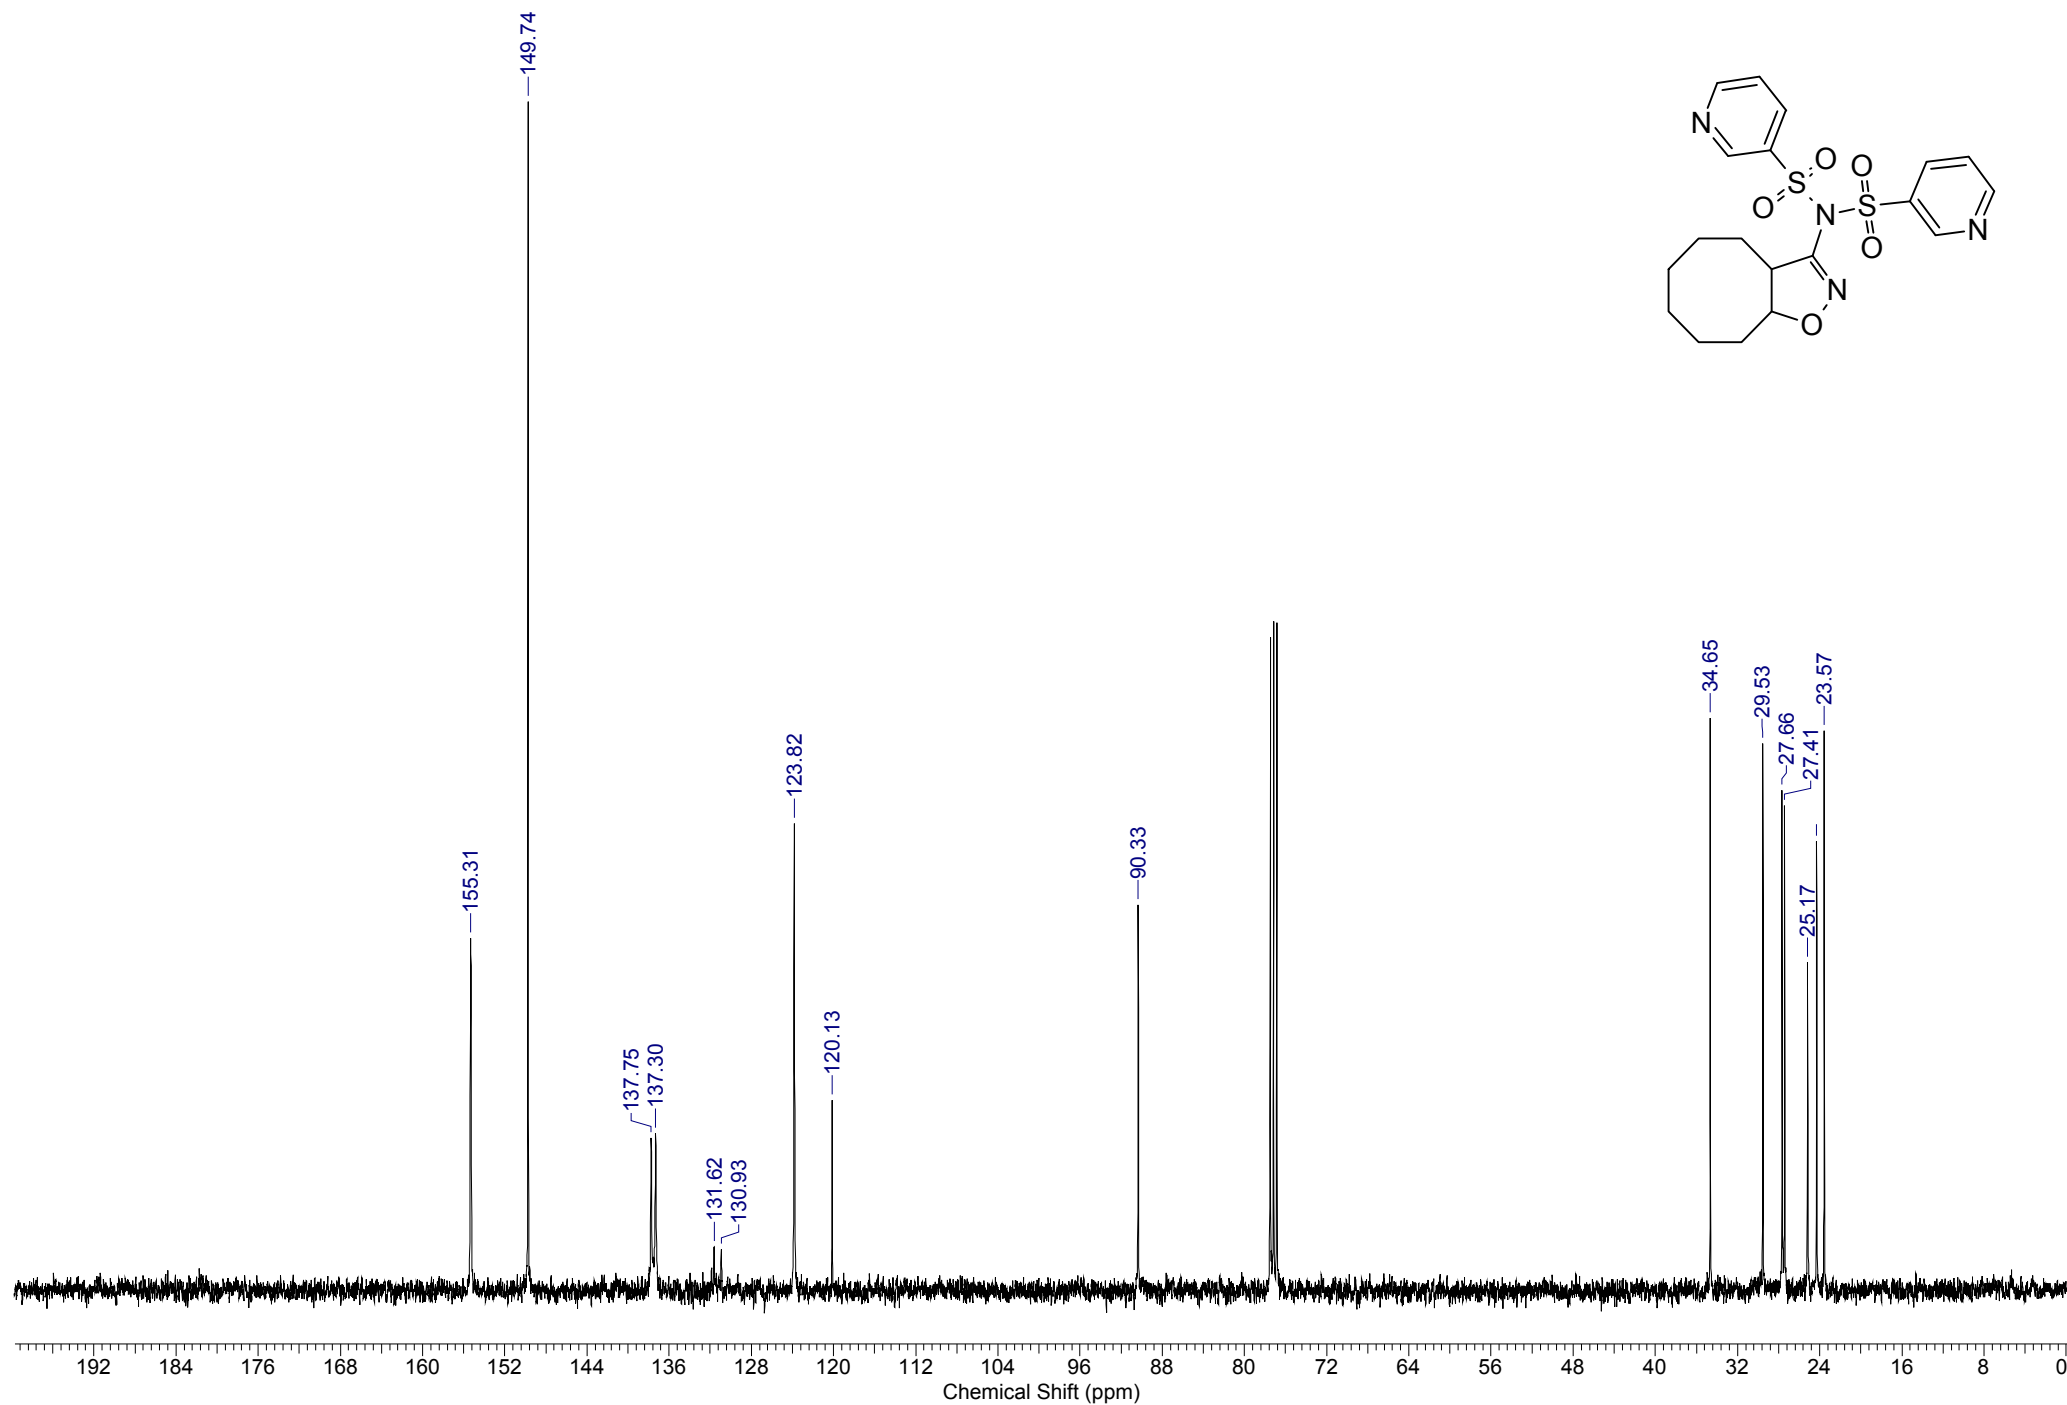

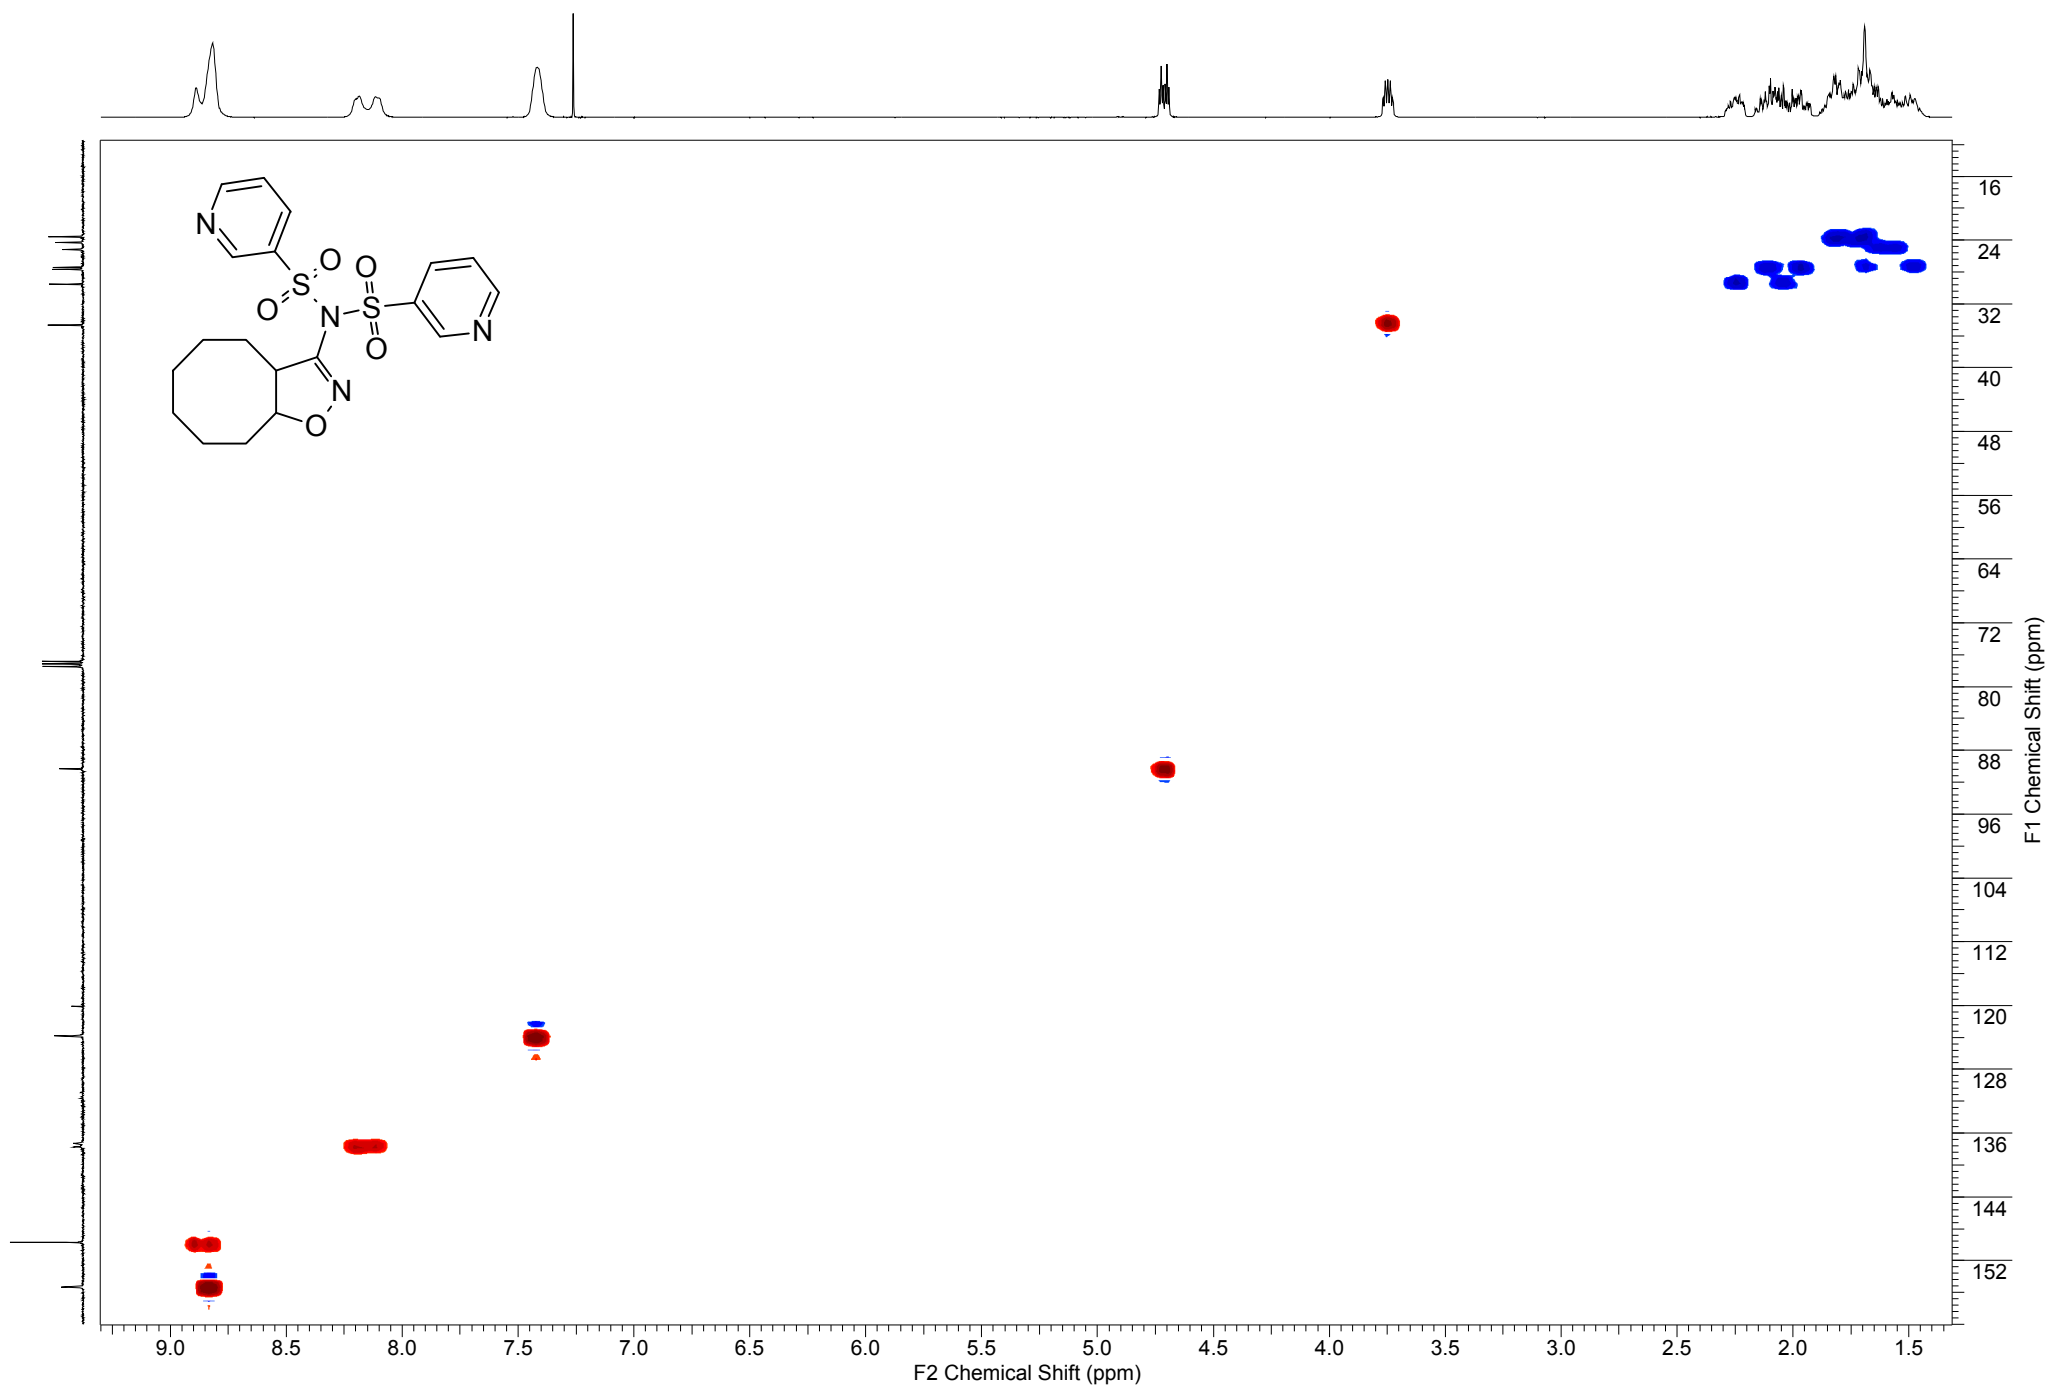

Supplement: s1 [file s1]
